# Supplementary material for: Odd-paired is a pioneer-like factor that coordinates with Zelda to control gene expression in embryos
Source: eLife. 2020 Jul 23;9:e59610. doi: 10.7554/eLife.59610 (PMC7417190; doi:10.7554/eLife.59610)
Supplement: Figure 3—source data 1. [file elife-59610-fig3-data1.xlsx]

## Sheet: Sheet1
test_id	gene_id	gene	locus	sample_1	sample_2	status	value_1	value_2	log2(fold_change)	test_stat	p_value	q_value
26-29-p	26-29-p	26-29-p	chr3L:13994230-13996571	opa RNAi_14D	control_14D	OK	44.3049	7.60523	-2.5424	-3.49373	5e-05	0.00119833
4E-T	4E-T	4E-T	chr4:951541-958392	opa RNAi_14D	control_14D	OK	76.622	31.5495	-1.28014	-2.56243	5e-05	0.00119833
AdSL	AdSL	AdSL	chr3R:17014575-17027987	opa RNAi_14D	control_14D	OK	1.36677	6.94074	2.34432	2.98105	5e-05	0.00119833
alphaTub84D	alphaTub84D	alphaTub84D	chr3R:7530752-7532732	opa RNAi_14D	control_14D	OK	24.0475	75.1524	1.64393	2.80769	5e-05	0.00119833
Ama	Ama	Ama	chr3R:6761512-6765261	opa RNAi_14D	control_14D	OK	55.089	156.363	1.50507	2.72737	5e-05	0.00119833
AP-1sigma	AP-1sigma	AP-1sigma	chr3R:23958650-23962555	opa RNAi_14D	control_14D	OK	833.807	80.5647	-3.3715	-6.50439	5e-05	0.00119833
Arf51F	Arf51F	Arf51F	chr2R:15322500-15325490	opa RNAi_14D	control_14D	OK	359.089	141.747	-1.34102	-2.82682	5e-05	0.00119833
Arfrp1	Arfrp1	Arfrp1	chrX:9107068-9108354	opa RNAi_14D	control_14D	OK	54.5783	8.60507	-2.66507	-3.72135	5e-05	0.00119833
Atox1	Atox1	Atox1	chr3L:21640994-21642599	opa RNAi_14D	control_14D	OK	583.347	258.048	-1.17671	-2.55178	5e-05	0.00119833
bam	bam	bam	chr3R:25242019-25245057	opa RNAi_14D	control_14D	OK	34.1927	6.07048	-2.49381	-3.81144	5e-05	0.00119833
beat-Vb	beat-Vb	beat-Vb	chr3R:12916055-12934813	opa RNAi_14D	control_14D	OK	0	1.79061	inf	#NAME?	5e-05	0.00119833
BigH1	BigH1	BigH1	chr3R:14663449-14664822	opa RNAi_14D	control_14D	OK	175.269	59.9369	-1.54805	-2.83094	5e-05	0.00119833
blanks	blanks	blanks	chr3L:5497522-5498958	opa RNAi_14D	control_14D	OK	16.471	90.2565	2.4541	3.92736	5e-05	0.00119833
Blos4	Blos4	Blos4	chr3L:10879084-10880188	opa RNAi_14D	control_14D	OK	375.13	156.402	-1.26213	-2.47539	5e-05	0.00119833
bnk	bnk	bnk	chr3R:31178388-31195762	opa RNAi_14D	control_14D	OK	418.914	20.636	-4.34342	-6.86532	5e-05	0.00119833
Bro	Bro	Bro	chr3L:1647868-1648612	opa RNAi_14D	control_14D	OK	457.032	65.825	-2.79559	-4.96675	5e-05	0.00119833
Bsg25A	Bsg25A	Bsg25A	chr2L:4682676-4687232	opa RNAi_14D	control_14D	OK	1500.18	437.143	-1.77896	-3.89445	5e-05	0.00119833
c(3)G	c(3)G	c(3)G	chr3R:15788520-15792579	opa RNAi_14D	control_14D	OK	55.3604	11.4825	-2.26942	-3.76839	5e-05	0.00119833
caz	caz	caz	chrX:16288809-16293520	opa RNAi_14D	control_14D	OK	4.25814	16.9546	1.99338	2.75076	5e-05	0.00119833
CG10158	CG10158	CG10158	chr2L:6943177-6945289	opa RNAi_14D	control_14D	OK	164.015	47.0089	-1.80282	-3.40209	5e-05	0.00119833
CG10395	CG10395	CG10395	chr2R:5350476-5352122	opa RNAi_14D	control_14D	OK	518.683	197.193	-1.39524	-2.91281	5e-05	0.00119833
CG11103	CG11103	CG11103	chrX:13782458-13783381	opa RNAi_14D	control_14D	OK	80.4598	30.1352	-1.41682	-2.33345	5e-05	0.00119833
CG11267	CG11267	CG11267	chr3L:13016049-13016903	opa RNAi_14D	control_14D	OK	587.631	99.8588	-2.55695	-4.85869	5e-05	0.00119833
CG11674	CG11674	CG11674	chrX:14201361-14225879	opa RNAi_14D	control_14D	OK	609.902	248.391	-1.29596	-2.8299	5e-05	0.00119833
CG11686	CG11686	CG11686	chr3R:13260355-13262227	opa RNAi_14D	control_14D	OK	41.559	8.89488	-2.22411	-2.71414	5e-05	0.00119833
CG11739	CG11739	CG11739	chr3R:4378599-4381210	opa RNAi_14D	control_14D	OK	27.4769	7.19083	-1.93399	-2.632	5e-05	0.00119833
CG11825	CG11825	CG11825	chr2R:10420413-10423650	opa RNAi_14D	control_14D	OK	562.757	91.3564	-2.62293	-4.03872	5e-05	0.00119833
CG11851	CG11851	CG11851	chr3R:25221588-25224118	opa RNAi_14D	control_14D	OK	10.1457	1.35132	-2.90844	-3.75954	5e-05	0.00119833
CG11985	CG11985	CG11985	chr3R:9014971-9015341	opa RNAi_14D	control_14D	OK	5220.74	2533.51	-1.04311	-2.36679	5e-05	0.00119833
CG11999	CG11999	CG11999	chr3R:5353716-5354747	opa RNAi_14D	control_14D	OK	339.258	82.3003	-2.04341	-3.91533	5e-05	0.00119833
CG12093	CG12093	CG12093	chr3L:2772559-2774007	opa RNAi_14D	control_14D	OK	2.68087	9.51349	1.82727	2.32821	5e-05	0.00119833
CG12207	CG12207	CG12207	chr3R:14289070-14302276	opa RNAi_14D	control_14D	OK	4.3763	0.654792	-2.7406	-2.73474	5e-05	0.00119833
CG1227	CG1227	CG1227	chr3R:7248150-7249738	opa RNAi_14D	control_14D	OK	222.426	90.9722	-1.28982	-2.63993	5e-05	0.00119833
CG12560	CG12560	CG12560	chr2L:8008301-8009477	opa RNAi_14D	control_14D	OK	29.1675	1.91237	-3.93093	-4.72002	5e-05	0.00119833
CG12567	CG12567	CG12567	chr2L:23161121-23174484	opa RNAi_14D	control_14D	OK	165.609	29.0405	-2.51164	-4.54109	5e-05	0.00119833
CG12717	CG12717	CG12717	chrX:12760641-12763611	opa RNAi_14D	control_14D	OK	0.662622	4.64135	2.80829	3.25273	5e-05	0.00119833
CG12728	CG12728	CG12728	chrX:5942605-5945250	opa RNAi_14D	control_14D	OK	20.055	56.9607	1.50601	2.67143	5e-05	0.00119833
CG12772	CG12772	CG12772	chrX:8677062-8680912	opa RNAi_14D	control_14D	OK	10.0666	2.44282	-2.04295	-2.71992	5e-05	0.00119833
CG12859	CG12859	CG12859	chr2R:14756515-14757846	opa RNAi_14D	control_14D	OK	2907.82	1486.72	-0.967806	-2.11951	5e-05	0.00119833
CG13000	CG13000	CG13000	chrX:16943289-16968679	opa RNAi_14D	control_14D	OK	1433.83	120.181	-3.57659	-5.85675	5e-05	0.00119833
CG13096	CG13096	CG13096	chr2L:8509068-8511866	opa RNAi_14D	control_14D	OK	93.0418	225.351	1.27622	2.74996	5e-05	0.00119833
CG13373	CG13373	CG13373	chrX:476983-478191	opa RNAi_14D	control_14D	OK	318.758	132.324	-1.26839	-2.50982	5e-05	0.00119833
CG13822	CG13822	CG13822	chr3R:23677357-23678421	opa RNAi_14D	control_14D	OK	116.551	17.9026	-2.70272	-4.23203	5e-05	0.00119833
CG13827	CG13827	CG13827	chr3R:23258364-23260602	opa RNAi_14D	control_14D	OK	26.7317	6.51622	-2.03644	-2.82487	5e-05	0.00119833
CG13949	CG13949	CG13949	chr2L:855336-856639	opa RNAi_14D	control_14D	OK	0	0.667343	inf	#NAME?	5e-05	0.00119833
CG14014	CG14014	CG14014	chr2L:5549708-5550835	opa RNAi_14D	control_14D	OK	53.853	13.897	-1.95425	-2.91071	5e-05	0.00119833
CG14057	CG14057	CG14057	chr3L:17042796-17045038	opa RNAi_14D	control_14D	OK	2165.25	846.254	-1.35537	-3.02286	5e-05	0.00119833
CG14103	CG14103	CG14103	chr3L:19803737-19805080	opa RNAi_14D	control_14D	OK	327.718	100.822	-1.70065	-3.37514	5e-05	0.00119833
CG14184	CG14184	CG14184	chr3L:20024686-20029020	opa RNAi_14D	control_14D	OK	454.618	171.529	-1.4062	-2.79779	5e-05	0.00119833
CG14186	CG14186	CG14186	chr3L:20098083-20103827	opa RNAi_14D	control_14D	OK	0	1.37051	inf	#NAME?	5e-05	0.00119833
CG14229	CG14229	CG14229	chrX:19693976-19695250	opa RNAi_14D	control_14D	OK	441.189	123.421	-1.8378	-3.63367	5e-05	0.00119833
CG14253	CG14253	CG14253	chr3R:26978540-26988517	opa RNAi_14D	control_14D	OK	27.5947	1.44618	-4.25407	-5.18355	5e-05	0.00119833
CG14434	CG14434	CG14434	chrX:6851908-6881580	opa RNAi_14D	control_14D	OK	829.192	189.351	-2.13064	-2.65106	5e-05	0.00119833
CG14464	CG14464	CG14464	chr2R:4829245-4830587	opa RNAi_14D	control_14D	OK	4311.14	1970.44	-1.12955	-2.61609	5e-05	0.00119833
CG14658	CG14658	CG14658	chr3R:4829910-4830513	opa RNAi_14D	control_14D	OK	0	1.19362	inf	#NAME?	5e-05	0.00119833
CG14764	CG14764	CG14764	chr2R:7942042-7955882	opa RNAi_14D	control_14D	OK	22.4798	5.58239	-2.00968	-2.55966	5e-05	0.00119833
CG14767	CG14767	CG14767	chr2R:8718016-8723839	opa RNAi_14D	control_14D	OK	14.9042	43.8008	1.55524	2.60538	5e-05	0.00119833
CG14806	CG14806	CG14806	chrX:1880281-1889950	opa RNAi_14D	control_14D	OK	397.671	163.639	-1.28106	-2.5375	5e-05	0.00119833
CG14903	CG14903	CG14903	chr3R:16573178-16573752	opa RNAi_14D	control_14D	OK	474.146	160.049	-1.56681	-2.90141	5e-05	0.00119833
CG14915	CG14915	CG14915	chr2L:11071026-11071532	opa RNAi_14D	control_14D	OK	19804.3	3975.63	-2.31656	-4.97742	5e-05	0.00119833
CG14985	CG14985	CG14985	chr3L:4003473-4006626	opa RNAi_14D	control_14D	OK	152.91	65.521	-1.22266	-2.45511	5e-05	0.00119833
CG14997	CG14997	CG14997	chr3L:4240068-4242603	opa RNAi_14D	control_14D	OK	8.84899	27.3519	1.62806	2.45672	5e-05	0.00119833
CG15019	CG15019	CG15019	chr3L:4403486-4406059	opa RNAi_14D	control_14D	OK	1251.82	607.003	-1.04425	-2.36325	5e-05	0.00119833
CG15168	CG15168	CG15168	chr2L:18987706-18990233	opa RNAi_14D	control_14D	OK	1074.49	499.546	-1.10497	-2.31214	5e-05	0.00119833
CG15213	CG15213	CG15213	chr3L:5132795-5133220	opa RNAi_14D	control_14D	OK	91.2834	18.1162	-2.33308	-2.86717	5e-05	0.00119833
CG15237	CG15237	CG15237	chr2R:6807625-6809766	opa RNAi_14D	control_14D	OK	1140.4	308.633	-1.88558	-3.98153	5e-05	0.00119833
CG15312	CG15312	CG15312	chrX:10055628-10070868	opa RNAi_14D	control_14D	OK	22.8613	6.61801	-1.78844	-2.62224	5e-05	0.00119833
CG1532	CG1532	CG1532	chrX:21026124-21028361	opa RNAi_14D	control_14D	OK	116.463	46.8861	-1.31264	-2.42154	5e-05	0.00119833
CG15345	CG15345	CG15345	chrX:8397156-8398298	opa RNAi_14D	control_14D	OK	294.549	46.6586	-2.65829	-4.8922	5e-05	0.00119833
CG15456	CG15456	CG15456	chrX:20426430-20427042	opa RNAi_14D	control_14D	OK	366.013	94.4168	-1.95478	-3.44836	5e-05	0.00119833
CG15817	CG15817	CG15817	chr3R:29229160-29235302	opa RNAi_14D	control_14D	OK	2.49539	0.526835	-2.24384	-2.68563	5e-05	0.00119833
CG15876	CG15876	CG15876	chr3L:4692782-4796253	opa RNAi_14D	control_14D	OK	439.867	77.8695	-2.49794	-3.00587	5e-05	0.00119833
CG15905	CG15905	CG15905	chr2R:19646482-19647645	opa RNAi_14D	control_14D	OK	18.3137	0.917527	-4.31903	-4.52628	5e-05	0.00119833
CG17163	CG17163	CG17163	chrX:23068300-23082709	opa RNAi_14D	control_14D	OK	104.661	39.8572	-1.3928	-2.53857	5e-05	0.00119833
CG17486	CG17486	CG17486	chr2R:4619029-4620833	opa RNAi_14D	control_14D	OK	323.976	154.805	-1.06544	-2.37749	5e-05	0.00119833
CG17508	CG17508	CG17508	chr2R:5608634-5611586	opa RNAi_14D	control_14D	OK	448.108	172.746	-1.37519	-2.88402	5e-05	0.00119833
CG17746	CG17746	CG17746	chr3L:3236804-3239578	opa RNAi_14D	control_14D	OK	106.856	38.5883	-1.46944	-2.56971	5e-05	0.00119833
CG1792	CG1792	CG1792	chr3R:31616302-31617837	opa RNAi_14D	control_14D	OK	4.79906	18.1433	1.91861	2.53829	5e-05	0.00119833
CG18258	CG18258	CG18258	chrX:17212306-17213977	opa RNAi_14D	control_14D	OK	0	0.515981	inf	#NAME?	5e-05	0.00119833
CG18269	CG18269	CG18269	chr2L:5551837-5552756	opa RNAi_14D	control_14D	OK	42.6064	8.92053	-2.25587	-3.06636	5e-05	0.00119833
CG18343	CG18343	CG18343	chr2R:12138694-12140229	opa RNAi_14D	control_14D	OK	861.979	377.199	-1.19233	-2.4281	5e-05	0.00119833
CG18812	CG18812	CG18812	chr2R:7716807-7735622	opa RNAi_14D	control_14D	OK	29.8613	5.77122	-2.37133	-3.37428	5e-05	0.00119833
CG2021	CG2021	CG2021	chr3L:1775632-1777411	opa RNAi_14D	control_14D	OK	1191.58	516.777	-1.20526	-2.44377	5e-05	0.00119833
CG2678	CG2678	CG2678	chr3R:7913850-7916550	opa RNAi_14D	control_14D	OK	21.9793	5.85311	-1.90887	-2.77996	5e-05	0.00119833
CG2921	CG2921	CG2921	chr2R:22073537-22075308	opa RNAi_14D	control_14D	OK	23.6342	7.18787	-1.71724	-2.4675	5e-05	0.00119833
CG2993	CG2993	CG2993	chr3R:7804664-7810014	opa RNAi_14D	control_14D	OK	4.41152	0.24667	-4.16062	-4.38569	5e-05	0.00119833
CG30096	CG30096	CG30096	chr2R:16320814-16322124	opa RNAi_14D	control_14D	OK	153.703	45.7429	-1.74853	-3.19893	5e-05	0.00119833
CG30345	CG30345	CG30345	chr2R:9148688-9151892	opa RNAi_14D	control_14D	OK	7.04602	1.63103	-2.11102	-2.64343	5e-05	0.00119833
CG30438	CG30438	CG30438	chr2R:5496673-5549543	opa RNAi_14D	control_14D	OK	19.7242	4.21602	-2.22602	-2.92793	5e-05	0.00119833
CG3045	CG3045	CG3045	chr2R:22136967-22174691	opa RNAi_14D	control_14D	OK	50.5689	17.3714	-1.54154	-2.46105	5e-05	0.00119833
CG31128	CG31128	CG31128	chr3R:24469396-24470310	opa RNAi_14D	control_14D	OK	0	1.71052	inf	#NAME?	5e-05	0.00119833
CG31279	CG31279	CG31279	chr3R:16430680-16432897	opa RNAi_14D	control_14D	OK	37.3203	7.40582	-2.33323	-2.92935	5e-05	0.00119833
CG3176	CG3176	CG3176	chrX:481861-482768	opa RNAi_14D	control_14D	OK	45.4254	11.2596	-2.01234	-2.6729	5e-05	0.00119833
CG31961	CG31961	CG31961	chr2L:4186249-4187793	opa RNAi_14D	control_14D	OK	96.2684	35.6124	-1.43468	-2.53314	5e-05	0.00119833
CG32088	CG32088	CG32088	chr3L:11728344-11732048	opa RNAi_14D	control_14D	OK	2.16077	0.140263	-3.94533	-3.4938	5e-05	0.00119833
CG32109	CG32109	CG32109	chr3L:12745343-12750056	opa RNAi_14D	control_14D	OK	92.3197	27.4466	-1.75001	-2.72033	5e-05	0.00119833
CG32202	CG32202	CG32202	chr3L:18682183-18682860	opa RNAi_14D	control_14D	OK	917.201	316.536	-1.53487	-3.22244	5e-05	0.00119833
CG32243	CG32243	CG32243	chr3L:4539301-4541244	opa RNAi_14D	control_14D	OK	19.379	70.6429	1.86605	3.12158	5e-05	0.00119833
CG3226	CG3226	CG3226	chrX:6653112-6654248	opa RNAi_14D	control_14D	OK	323.027	134.348	-1.26568	-2.57039	5e-05	0.00119833
CG32485	CG32485	CG32485	chr3L:3050322-3051765	opa RNAi_14D	control_14D	OK	23.4324	3.81546	-2.61857	-3.48131	5e-05	0.00119833
CG32521	CG32521	CG32521	chrX:21205309-21281171	opa RNAi_14D	control_14D	OK	32.9945	102.843	1.64015	2.80088	5e-05	0.00119833
CG32581	CG32581	CG32581	chrX:15796907-15799162	opa RNAi_14D	control_14D	OK	54.1692	17.8615	-1.60062	-2.54334	5e-05	0.00119833
CG3301	CG3301	CG3301	chr3R:21274242-21276249	opa RNAi_14D	control_14D	OK	14.2363	0	#NAME?	#NAME?	5e-05	0.00119833
CG33970	CG33970	CG33970	chr3R:26318354-26362588	opa RNAi_14D	control_14D	OK	0	0.540976	inf	#NAME?	5e-05	0.00119833
CG34008	CG34008	CG34008	chr3R:20580114-20581522	opa RNAi_14D	control_14D	OK	441.471	152.706	-1.53157	-2.50905	5e-05	0.00119833
CG34015	CG34015	CG34015	chrX:16447567-16448302	opa RNAi_14D	control_14D	OK	1122.54	413.657	-1.44026	-3.13417	5e-05	0.00119833
CG34117	CG34117	CG34117	chr3R:9399569-9400053	opa RNAi_14D	control_14D	OK	1595.09	723.673	-1.14023	-2.45109	5e-05	0.00119833
CG34137	CG34137	CG34137	chr2L:22131220-22169143	opa RNAi_14D	control_14D	OK	805.85	123.212	-2.70937	-3.79964	5e-05	0.00119833
CG34348	CG34348	CG34348	chrX:11334186-11348001	opa RNAi_14D	control_14D	OK	43.4221	13.4815	-1.68745	-2.59652	5e-05	0.00119833
CG34423	CG34423	CG34423	chr2R:23357659-23359204	opa RNAi_14D	control_14D	OK	114.381	4.21973	-4.76055	-5.3684	5e-05	0.00119833
CG34424	CG34424	CG34424	chr2R:23359214-23366355	opa RNAi_14D	control_14D	OK	85.6895	11.2885	-2.92427	-3.97269	5e-05	0.00119833
CG3457	CG3457	CG3457	chrX:2187819-2188919	opa RNAi_14D	control_14D	OK	359.913	153.511	-1.22931	-2.53327	5e-05	0.00119833
CG3726	CG3726	CG3726	chrX:5917096-5941852	opa RNAi_14D	control_14D	OK	16.6198	4.40678	-1.91511	-2.88832	5e-05	0.00119833
CG40006	CG40006	CG40006	chr2L:22622416-22756349	opa RNAi_14D	control_14D	OK	9.85817	1.64317	-2.58483	-3.21087	5e-05	0.00119833
CG40127	CG40127	CG40127	chr2R:4186834-4188127	opa RNAi_14D	control_14D	OK	9299.6	3965.8	-1.22956	-2.91381	5e-05	0.00119833
CG40228	CG40228	CG40228	chr3L:27082090-27083906	opa RNAi_14D	control_14D	OK	1676.79	491.542	-1.77031	-3.48555	5e-05	0.00119833
CG40378	CG40378	CG40378	chr2R:495143-642389	opa RNAi_14D	control_14D	OK	16.5685	3.93197	-2.07512	-2.51588	5e-05	0.00119833
CG4045	CG4045	CG4045	chrX:2066434-2075900	opa RNAi_14D	control_14D	OK	77.981	28.025	-1.47641	-2.33026	5e-05	0.00119833
CG40801	CG40801	CG40801	chrY:3266935-3267665	opa RNAi_14D	control_14D	OK	0	5.19087	inf	#NAME?	5e-05	0.00119833
CG40936	CG40936	CG40936	chrY:356354-356989	opa RNAi_14D	control_14D	OK	0	1.52505	inf	#NAME?	5e-05	0.00119833
CG41128	CG41128	CG41128	chr3R:3750362-3752353	opa RNAi_14D	control_14D	OK	6182.62	3276.34	-0.916132	-2.0999	5e-05	0.00119833
CG41378	CG41378	CG41378	chr2R:2770379-2846708	opa RNAi_14D	control_14D	OK	501.379	141.732	-1.82274	-3.55119	5e-05	0.00119833
CG41423	CG41423	CG41423	chrY:3265433-3266691	opa RNAi_14D	control_14D	OK	0	10.0867	inf	#NAME?	5e-05	0.00119833
CG41520	CG41520	CG41520	chr2R:1649060-1778937	opa RNAi_14D	control_14D	OK	9.46545	0.786803	-3.5886	-4.47753	5e-05	0.00119833
CG42565	CG42565	CG42565	chr2R:22657900-22661389	opa RNAi_14D	control_14D	OK	45.5667	3.24694	-3.81083	-4.71305	5e-05	0.00119833
CG42575	CG42575	CG42575	chr3L:11123347-11134663	opa RNAi_14D	control_14D	OK	4.05804	14.3332	1.82051	2.59241	5e-05	0.00119833
CG42598	CG42598	CG42598	chr3L:26354139-26371356	opa RNAi_14D	control_14D	OK	6.90062	0.719818	-3.26102	-3.31085	5e-05	0.00119833
CG42857	CG42857	CG42857	chr3R:9820513-9821191	opa RNAi_14D	control_14D	OK	163.64	2.85911	-5.83882	-6.23086	5e-05	0.00119833
CG43174	CG43174	CG43174	chr3L:17934007-17946114	opa RNAi_14D	control_14D	OK	0.585537	0	#NAME?	#NAME?	5e-05	0.00119833
CG43184	CG43184	CG43184	chr3L:13837755-13838080	opa RNAi_14D	control_14D	OK	257.485	70.8858	-1.86092	-2.74667	5e-05	0.00119833
CG43676	CG43676	CG43676	chr2R:673573-705848	opa RNAi_14D	control_14D	OK	25.7305	4.90961	-2.3898	-2.62405	5e-05	0.00119833
CG43725	CG43725	CG43725	chr2L:11075512-11075962	opa RNAi_14D	control_14D	OK	1527.34	287.198	-2.4109	-4.61538	5e-05	0.00119833
CG44001	CG44001	CG44001	chr2L:5037708-5051062	opa RNAi_14D	control_14D	OK	256.448	92.0521	-1.47814	-2.84266	5e-05	0.00119833
CG44005	CG44005	CG44005	chr3L:18070299-18072123	opa RNAi_14D	control_14D	OK	3.69687	0.634845	-2.54183	-2.44908	5e-05	0.00119833
CG44774	CG44774	CG44774	chrX:4921677-4938105	opa RNAi_14D	control_14D	OK	315.013	142.991	-1.13949	-2.55984	5e-05	0.00119833
CG4570	CG4570	CG4570	chr3R:10856806-10858066	opa RNAi_14D	control_14D	OK	488.922	112.994	-2.11336	-4.26577	5e-05	0.00119833
CG4747	CG4747	CG4747	chr2L:10003831-10008889	opa RNAi_14D	control_14D	OK	45.6858	114.189	1.3216	2.58087	5e-05	0.00119833
CG4935	CG4935	CG4935	chr2L:16262140-16263483	opa RNAi_14D	control_14D	OK	11.0283	2.27488	-2.27734	-2.68842	5e-05	0.00119833
CG4968	CG4968	CG4968	chr2L:10306921-10308045	opa RNAi_14D	control_14D	OK	1168.62	520.077	-1.16801	-2.71002	5e-05	0.00119833
CG5002	CG5002	CG5002	chr2R:17750292-17753214	opa RNAi_14D	control_14D	OK	2.87208	19.298	2.74829	3.54689	5e-05	0.00119833
CG5323	CG5323	CG5323	chr2R:18615059-18619328	opa RNAi_14D	control_14D	OK	387.019	172.295	-1.16752	-2.38723	5e-05	0.00119833
CG5346	CG5346	CG5346	chr3R:22520086-22528663	opa RNAi_14D	control_14D	OK	2.6696	11.5861	2.1177	2.76555	5e-05	0.00119833
CG5568	CG5568	CG5568	chr3L:5871500-5875466	opa RNAi_14D	control_14D	OK	74.1933	7.91907	-3.22789	-3.80498	5e-05	0.00119833
CG5727	CG5727	CG5727	chr2L:10209852-10210681	opa RNAi_14D	control_14D	OK	510.002	152.739	-1.73944	-3.47569	5e-05	0.00119833
CG6051	CG6051	CG6051	chr3R:27124758-27151069	opa RNAi_14D	control_14D	OK	2.66043	0.43951	-2.59769	-2.7336	5e-05	0.00119833
CG6357	CG6357	CG6357	chr2R:13840052-13841743	opa RNAi_14D	control_14D	OK	254.093	75.6198	-1.74852	-3.45318	5e-05	0.00119833
CG6567	CG6567	CG6567	chr3R:10852723-10854451	opa RNAi_14D	control_14D	OK	129.474	10.0592	-3.68608	-4.74845	5e-05	0.00119833
CG7197	CG7197	CG7197	chr3L:8297017-8299839	opa RNAi_14D	control_14D	OK	265.636	90.9237	-1.54672	-2.77034	5e-05	0.00119833
CG7220	CG7220	CG7220	chr2R:10729577-10738370	opa RNAi_14D	control_14D	OK	231.351	74.7749	-1.62946	-2.87918	5e-05	0.00119833
CG7328	CG7328	CG7328	chr3L:20139209-20140607	opa RNAi_14D	control_14D	OK	14.0533	2.66432	-2.39907	-2.99988	5e-05	0.00119833
CG7332	CG7332	CG7332	chrX:18884512-18888860	opa RNAi_14D	control_14D	OK	23.5352	8.55163	-1.46055	-2.2772	5e-05	0.00119833
CG7461	CG7461	CG7461	chr2R:19305171-19307445	opa RNAi_14D	control_14D	OK	71.8793	163.37	1.18449	2.48006	5e-05	0.00119833
CG7949	CG7949	CG7949	chr3L:10882889-10883573	opa RNAi_14D	control_14D	OK	166.167	36.1947	-2.19878	-3.55603	5e-05	0.00119833
CG8003	CG8003	CG8003	chr3L:10661474-10663157	opa RNAi_14D	control_14D	OK	2.23827	10.3446	2.20842	2.78455	5e-05	0.00119833
CG8420	CG8420	CG8420	chr3R:9246648-9251431	opa RNAi_14D	control_14D	OK	21.3906	5.5217	-1.95379	-2.43403	5e-05	0.00119833
CG8435	CG8435	CG8435	chr2R:16169599-16170861	opa RNAi_14D	control_14D	OK	712.932	221.7	-1.68515	-3.78028	5e-05	0.00119833
CG8507	CG8507	CG8507	chr3R:9791482-9793098	opa RNAi_14D	control_14D	OK	619.056	155.489	-1.99325	-4.38011	5e-05	0.00119833
CG8675	CG8675	CG8675	chrX:17232941-17305475	opa RNAi_14D	control_14D	OK	530.793	228.252	-1.21752	-2.5888	5e-05	0.00119833
CG8891	CG8891	CG8891	chr2L:4977311-4979379	opa RNAi_14D	control_14D	OK	2008.72	816.667	-1.29846	-2.95085	5e-05	0.00119833
CG8924	CG8924	CG8924	chrX:15941076-15944449	opa RNAi_14D	control_14D	OK	83.4273	21.0783	-1.98476	-3.60016	5e-05	0.00119833
CG9016	CG9016	CG9016	chr2L:5922875-5923653	opa RNAi_14D	control_14D	OK	1.73051	0	#NAME?	#NAME?	5e-05	0.00119833
CG9231	CG9231	CG9231	chr3L:19585092-19586003	opa RNAi_14D	control_14D	OK	732.427	294.237	-1.31571	-2.85255	5e-05	0.00119833
CG9272	CG9272	CG9272	chr2L:20926318-20927860	opa RNAi_14D	control_14D	OK	57.614	16.1927	-1.83108	-2.76351	5e-05	0.00119833
CG9393	CG9393	CG9393	chr3R:9561582-9563673	opa RNAi_14D	control_14D	OK	57.9018	17.0898	-1.76048	-2.85088	5e-05	0.00119833
CG9773	CG9773	CG9773	chr3R:8675282-8676613	opa RNAi_14D	control_14D	OK	124.778	51.3076	-1.28212	-2.31219	5e-05	0.00119833
CheB53a	CheB53a	CheB53a	chr2R:16466708-16467522	opa RNAi_14D	control_14D	OK	0.554624	0	#NAME?	#NAME?	5e-05	0.00119833
CheB53b	CheB53b	CheB53b	chr2R:16468208-16468934	opa RNAi_14D	control_14D	OK	8.25573	0	#NAME?	#NAME?	5e-05	0.00119833
CHIP	CHIP	CHIP	chr2L:10437547-10439240	opa RNAi_14D	control_14D	OK	586.855	207.102	-1.50266	-3.22997	5e-05	0.00119833
cib	cib	cib	chrX:4106112-4110981	opa RNAi_14D	control_14D	OK	33.0211	155.129	2.232	3.8236	5e-05	0.00119833
conu	conu	conu	chr2R:4744347-4758048	opa RNAi_14D	control_14D	OK	394.138	48.5469	-3.02125	-5.94158	5e-05	0.00119833
Cp1	Cp1	Cp1	chr2R:13960674-13967981	opa RNAi_14D	control_14D	OK	391.701	111.8	-1.80883	-3.76845	5e-05	0.00119833
CR34335	CR34335	CR34335	chrX:3373158-3573622	opa RNAi_14D	control_14D	OK	20138.6	6533.44	-1.62405	-3.11155	5e-05	0.00119833
CR40469	CR40469	CR40469	chrX:122492-122706	opa RNAi_14D	control_14D	OK	48.2409	5261.57	6.76909	9.97681	5e-05	0.00119833
CR40629	CR40629	CR40629	chrY:1122987-1123872	opa RNAi_14D	control_14D	OK	0	1.34276	inf	#NAME?	5e-05	0.00119833
CR43989	CR43989	CR43989	chr3L:11136048-11164801	opa RNAi_14D	control_14D	OK	13.5378	1.19737	-3.49906	-3.45817	5e-05	0.00119833
CR44101	CR44101	CR44101	chr2R:4621117-4622511	opa RNAi_14D	control_14D	OK	16.5176	0.36884	-5.48486	-5.02637	5e-05	0.00119833
CR44331	CR44331	CR44331	chr3R:8105331-8122294	opa RNAi_14D	control_14D	OK	19.7358	1.55754	-3.66347	-3.58615	5e-05	0.00119833
CR44525	CR44525	CR44525	chr3L:7408492-7409707	opa RNAi_14D	control_14D	OK	0	0.909666	inf	#NAME?	5e-05	0.00119833
CR44568	CR44568	CR44568	chrX:12622211-12622771	opa RNAi_14D	control_14D	OK	80.3315	1.20385	-6.06024	-6.07468	5e-05	0.00119833
CR44970	CR44970	CR44970	chr2L:12840894-12841323	opa RNAi_14D	control_14D	OK	11.872	0	#NAME?	#NAME?	5e-05	0.00119833
CR44971	CR44971	CR44971	chr2L:12841516-12841895	opa RNAi_14D	control_14D	OK	2.84525	0	#NAME?	#NAME?	5e-05	0.00119833
CR45381	CR45381	CR45381	chr3L:22643880-22644470	opa RNAi_14D	control_14D	OK	1.72317	0	#NAME?	#NAME?	5e-05	0.00119833
CR45433	CR45433	CR45433	chr3L:19861457-19861869	opa RNAi_14D	control_14D	OK	38.0558	2.62141	-3.8597	-4.04377	5e-05	0.00119833
CR45506	CR45506	CR45506	chrX:21187978-21188759	opa RNAi_14D	control_14D	OK	1.27222	0	#NAME?	#NAME?	5e-05	0.00119833
Crg-1	Crg-1	Crg-1	chrX:3792973-3797339	opa RNAi_14D	control_14D	OK	0.532293	0	#NAME?	#NAME?	5e-05	0.00119833
csw	csw	csw	chrX:2094233-2115701	opa RNAi_14D	control_14D	OK	4.48265	1.01603	-2.14141	-2.6576	5e-05	0.00119833
cta	cta	cta	chr2L:22981815-22992951	opa RNAi_14D	control_14D	OK	128.271	19.2878	-2.73343	-5.08677	5e-05	0.00119833
CycD	CycD	CycD	chrX:15906821-15909676	opa RNAi_14D	control_14D	OK	17.9407	5.20067	-1.78647	-2.48554	5e-05	0.00119833
Cyp1	Cyp1	Cyp1	chrX:16313708-16320370	opa RNAi_14D	control_14D	OK	2837.45	1280.28	-1.14813	-2.71526	5e-05	0.00119833
Cyp12c1	Cyp12c1	Cyp12c1	chr3L:18684258-18686319	opa RNAi_14D	control_14D	OK	2.88153	0	#NAME?	#NAME?	5e-05	0.00119833
Cyp4e2	Cyp4e2	Cyp4e2	chr2R:8444559-8447164	opa RNAi_14D	control_14D	OK	0.261206	3.19977	3.61471	3.27204	5e-05	0.00119833
Cyp6v1	Cyp6v1	Cyp6v1	chrX:20656890-20661425	opa RNAi_14D	control_14D	OK	38.2097	8.62724	-2.14697	-3.28731	5e-05	0.00119833
Der-2	Der-2	Der-2	chr3R:16482693-16484223	opa RNAi_14D	control_14D	OK	39.4017	12.7243	-1.63067	-2.4287	5e-05	0.00119833
Dfd	Dfd	Dfd	chr3R:6791835-6802428	opa RNAi_14D	control_14D	OK	5.19457	19.1877	1.88511	2.68576	5e-05	0.00119833
DNaseII	DNaseII	DNaseII	chr3R:18019374-18021161	opa RNAi_14D	control_14D	OK	1.07209	48.0859	5.48711	6.27722	5e-05	0.00119833
dob	dob	dob	chrX:15067006-15069091	opa RNAi_14D	control_14D	OK	10.4577	2.84499	-1.87807	-2.33502	5e-05	0.00119833
Doc2	Doc2	Doc2	chr3L:9012685-9019246	opa RNAi_14D	control_14D	OK	2.8399	14.4254	2.3447	2.76396	5e-05	0.00119833
Doc3	Doc3	Doc3	chr3L:9005195-9007249	opa RNAi_14D	control_14D	OK	10.4085	62.2688	2.58075	4.07563	5e-05	0.00119833
Dpy-30L1	Dpy-30L1	Dpy-30L1	chr2L:10732652-10736071	opa RNAi_14D	control_14D	OK	1117.12	524.625	-1.09043	-2.40968	5e-05	0.00119833
e(y)2	e(y)2	e(y)2	chrX:11573730-11576620	opa RNAi_14D	control_14D	OK	1688.59	741.827	-1.18667	-2.58688	5e-05	0.00119833
Elba2	Elba2	Elba2	chr2L:2577686-2579179	opa RNAi_14D	control_14D	OK	341.587	135.522	-1.33373	-2.70784	5e-05	0.00119833
Elba3	Elba3	Elba3	chr2L:4687510-4688956	opa RNAi_14D	control_14D	OK	73.5858	12.2386	-2.58799	-4.05458	5e-05	0.00119833
fdy	fdy	fdy	chrY:3022288-3024026	opa RNAi_14D	control_14D	OK	0	1.04652	inf	#NAME?	5e-05	0.00119833
fh	fh	fh	chrX:9148079-9149071	opa RNAi_14D	control_14D	OK	139.688	46.5791	-1.58445	-2.81013	5e-05	0.00119833
Fis1	Fis1	Fis1	chr2R:5603586-5604834	opa RNAi_14D	control_14D	OK	1362.3	585.931	-1.21724	-2.70104	5e-05	0.00119833
foi	foi	foi	chr3L:8525243-8534503	opa RNAi_14D	control_14D	OK	2.58072	8.7004	1.75331	2.5138	5e-05	0.00119833
ftz-f1	ftz-f1	ftz-f1	chr3L:18750606-18801309	opa RNAi_14D	control_14D	OK	37.2547	6.82805	-2.44788	-4.27295	5e-05	0.00119833
g	g	g	chrX:13727203-13736278	opa RNAi_14D	control_14D	OK	5.21195	0.594644	-3.13173	-3.92108	5e-05	0.00119833
geminin	geminin	geminin	chr2R:6655462-6656594	opa RNAi_14D	control_14D	OK	2014.89	940.751	-1.09881	-2.57008	5e-05	0.00119833
gk	gk	gk	chr3L:18139401-18145418	opa RNAi_14D	control_14D	OK	193.257	77.5523	-1.31728	-2.54507	5e-05	0.00119833
Gmer	Gmer	Gmer	chr2R:22886397-22888857	opa RNAi_14D	control_14D	OK	227.898	86.947	-1.39018	-2.56501	5e-05	0.00119833
Gnf1	Gnf1	Gnf1	chr3R:4906621-4910081	opa RNAi_14D	control_14D	OK	0.250701	2.2181	3.14528	3.24631	5e-05	0.00119833
Gos28	Gos28	Gos28	chr3R:18663737-18665307	opa RNAi_14D	control_14D	OK	269.979	69.6455	-1.95474	-3.60207	5e-05	0.00119833
gus	gus	gus	chr2R:5116989-5129296	opa RNAi_14D	control_14D	OK	843.231	220.385	-1.9359	-4.1832	5e-05	0.00119833
H	H	H	chr3R:20621937-20628915	opa RNAi_14D	control_14D	OK	4.49765	1.24693	-1.85079	-2.51154	5e-05	0.00119833
halo	halo	halo	chr2L:1517532-1518148	opa RNAi_14D	control_14D	OK	4720.45	943.066	-2.3235	-4.98185	5e-05	0.00119833
hng2	hng2	hng2	chr3R:8806321-8807581	opa RNAi_14D	control_14D	OK	31.121	9.57558	-1.70046	-2.37614	5e-05	0.00119833
Hsp22	Hsp22	Hsp22	chr3L:9372721-9374964	opa RNAi_14D	control_14D	OK	161.668	26.9514	-2.5846	-4.33058	5e-05	0.00119833
Hsp70Bb	Hsp70Bb	Hsp70Bb	chr3R:12505792-12508139	opa RNAi_14D	control_14D	OK	0	6.75464	inf	#NAME?	5e-05	0.00119833
HSPC300	HSPC300	HSPC300	chr2R:24027716-24028789	opa RNAi_14D	control_14D	OK	522.109	140.487	-1.89391	-3.18622	5e-05	0.00119833
ics	ics	ics	chr2L:13639446-13642602	opa RNAi_14D	control_14D	OK	367.292	164.31	-1.1605	-2.41281	5e-05	0.00119833
Ih	Ih	Ih	chr2R:14276129-14300095	opa RNAi_14D	control_14D	OK	39.5674	0.748305	-5.72454	-6.80402	5e-05	0.00119833
inaF-B	inaF-B	inaF-B	chrX:11724245-11736617	opa RNAi_14D	control_14D	OK	1.97905	31.0104	3.96988	5.12995	5e-05	0.00119833
JIL-1	JIL-1	JIL-1	chr3L:11078751-11093193	opa RNAi_14D	control_14D	OK	93.4276	35.8924	-1.38017	-2.90972	5e-05	0.00119833
Jon99Fi	Jon99Fi	Jon99Fi	chr3R:30488962-30489895	opa RNAi_14D	control_14D	OK	0	4.44548	inf	#NAME?	5e-05	0.00119833
Jon99Fii	Jon99Fii	Jon99Fii	chr3R:30487015-30487928	opa RNAi_14D	control_14D	OK	0	4.13982	inf	#NAME?	5e-05	0.00119833
JTBR	JTBR	JTBR	chr3L:1798802-1802856	opa RNAi_14D	control_14D	OK	250.55	30.6148	-3.0328	-4.7147	5e-05	0.00119833
kek1	kek1	kek1	chr2L:12816999-12822787	opa RNAi_14D	control_14D	OK	4.69302	0.988934	-2.24657	-2.87748	5e-05	0.00119833
klu	klu	klu	chr3L:10981170-11009188	opa RNAi_14D	control_14D	OK	0.310681	3.73351	3.58703	4.1788	5e-05	0.00119833
krz	krz	krz	chr3R:32045313-32051993	opa RNAi_14D	control_14D	OK	336.868	109.084	-1.62674	-3.43913	5e-05	0.00119833
l(2)35Be	l(2)35Be	l(2)35Be	chr2L:15005732-15007431	opa RNAi_14D	control_14D	OK	1387.89	610.183	-1.18558	-2.51344	5e-05	0.00119833
l(2)SH0834	l(2)SH0834	l(2)SH0834	chr2L:10311049-10312099	opa RNAi_14D	control_14D	OK	379.786	137.152	-1.46941	-2.94546	5e-05	0.00119833
lic	lic	lic	chrX:13091144-13093986	opa RNAi_14D	control_14D	OK	640.185	197.982	-1.69312	-3.74415	5e-05	0.00119833
Manf	Manf	Manf	chr3R:16349403-16357015	opa RNAi_14D	control_14D	OK	472.841	207.899	-1.18548	-2.5047	5e-05	0.00119833
Mdh1	Mdh1	Mdh1	chr2L:10393773-10396332	opa RNAi_14D	control_14D	OK	253.329	86.163	-1.55587	-2.93453	5e-05	0.00119833
MED16	MED16	MED16	chr2R:22183137-22185892	opa RNAi_14D	control_14D	OK	0.779949	3.61525	2.21264	2.59983	5e-05	0.00119833
MED21	MED21	MED21	chr3L:25107593-25115946	opa RNAi_14D	control_14D	OK	1216.06	533.454	-1.18878	-2.40687	5e-05	0.00119833
MED22	MED22	MED22	chrX:928138-930098	opa RNAi_14D	control_14D	OK	2799.55	1159.56	-1.27161	-2.93861	5e-05	0.00119833
mol	mol	mol	chr2L:14975746-14997559	opa RNAi_14D	control_14D	OK	14.8015	2.75971	-2.42315	-3.1149	5e-05	0.00119833
mrj	mrj	mrj	chr2R:16203328-16223187	opa RNAi_14D	control_14D	OK	169.891	70.6898	-1.26503	-2.61095	5e-05	0.00119833
mRpL20	mRpL20	mRpL20	chr3L:13017148-13017867	opa RNAi_14D	control_14D	OK	344.338	119.176	-1.53073	-2.86624	5e-05	0.00119833
mRpL24	mRpL24	mRpL24	chr2L:4942741-4945361	opa RNAi_14D	control_14D	OK	266.938	83.7406	-1.6725	-3.17306	5e-05	0.00119833
mRpL34	mRpL34	mRpL34	chr2R:16098947-16102608	opa RNAi_14D	control_14D	OK	1507.5	563.659	-1.41926	-2.70395	5e-05	0.00119833
mRpL39	mRpL39	mRpL39	chr3L:14997980-14999666	opa RNAi_14D	control_14D	OK	357.215	156.089	-1.19442	-2.4516	5e-05	0.00119833
mRpS14	mRpS14	mRpS14	chrX:19474155-19484643	opa RNAi_14D	control_14D	OK	552.594	225.341	-1.29411	-2.42218	5e-05	0.00119833
mRpS21	mRpS21	mRpS21	chr3R:13379841-13381809	opa RNAi_14D	control_14D	OK	1686.17	712.608	-1.24257	-2.64284	5e-05	0.00119833
MSBP	MSBP	MSBP	chrX:15887566-15890109	opa RNAi_14D	control_14D	OK	729.044	267.335	-1.44736	-3.35419	5e-05	0.00119833
msd1	msd1	msd1	chr3L:1331743-1333146	opa RNAi_14D	control_14D	OK	1309.04	472.979	-1.46866	-2.2541	5e-05	0.00119833
MtnA	MtnA	MtnA	chr3R:9783406-9784370	opa RNAi_14D	control_14D	OK	146.154	40.2728	-1.85961	-2.53659	5e-05	0.00119833
Myd88	Myd88	Myd88	chr2R:9302822-9308722	opa RNAi_14D	control_14D	OK	8.73793	2.78883	-1.64763	-2.21196	5e-05	0.00119833
Naa60	Naa60	Naa60	chr3L:9726894-9729650	opa RNAi_14D	control_14D	OK	24.2101	5.24395	-2.20688	-2.95176	5e-05	0.00119833
Nap1	Nap1	Nap1	chr2R:23903749-23907294	opa RNAi_14D	control_14D	OK	475.648	153.526	-1.63141	-3.51891	5e-05	0.00119833
Nca	Nca	Nca	chr3L:19991886-19997568	opa RNAi_14D	control_14D	OK	451.925	166.747	-1.43842	-2.8029	5e-05	0.00119833
NFAT	NFAT	NFAT	chrX:13624744-13664568	opa RNAi_14D	control_14D	OK	17.6913	42.608	1.26808	2.51035	5e-05	0.00119833
nmd	nmd	nmd	chr2L:10302172-10303947	opa RNAi_14D	control_14D	OK	447.038	144.133	-1.633	-3.48284	5e-05	0.00119833
nompC	nompC	nompC	chr2L:5346236-5365760	opa RNAi_14D	control_14D	OK	0.059799	0.94032	3.97496	3.17931	5e-05	0.00119833
Nplp2	Nplp2	Nplp2	chr3L:13356375-13357223	opa RNAi_14D	control_14D	OK	60.5301	273.323	2.17488	3.35802	5e-05	0.00119833
nrv3	nrv3	nrv3	chr2L:21379999-21393319	opa RNAi_14D	control_14D	OK	10.6765	0.251213	-5.40938	-4.09048	5e-05	0.00119833
nvd	nvd	nvd	chr3L:24324865-24401655	opa RNAi_14D	control_14D	OK	55.2971	0.54714	-6.65915	-7.73376	5e-05	0.00119833
obst-B	obst-B	obst-B	chr2L:10032689-10038954	opa RNAi_14D	control_14D	OK	14.6726	2.30112	-2.67271	-2.97199	5e-05	0.00119833
os	os	os	chrX:18305353-18309291	opa RNAi_14D	control_14D	OK	5.73184	1.43965	-1.99328	-2.44396	5e-05	0.00119833
Ost48	Ost48	Ost48	chrX:9156928-9158515	opa RNAi_14D	control_14D	OK	46.053	111.687	1.27809	2.40507	5e-05	0.00119833
Papss	Papss	Papss	chr3L:19845292-19860925	opa RNAi_14D	control_14D	OK	0.355057	2.32379	2.71035	2.47344	5e-05	0.00119833
Pde9	Pde9	Pde9	chrX:12785562-12897327	opa RNAi_14D	control_14D	OK	2.67548	0.653246	-2.0341	-2.65286	5e-05	0.00119833
pim	pim	pim	chr2L:10362988-10364092	opa RNAi_14D	control_14D	OK	556.986	243.28	-1.19503	-2.50432	5e-05	0.00119833
Pino	Pino	Pino	chr2L:1114653-1128953	opa RNAi_14D	control_14D	OK	52.2521	122.776	1.23247	2.44377	5e-05	0.00119833
plu	plu	plu	chr2R:20262957-20263684	opa RNAi_14D	control_14D	OK	999.271	378.277	-1.40143	-2.98354	5e-05	0.00119833
pncr011:3L	pncr011:3L	pncr011:3L	chr3L:11096495-11100578	opa RNAi_14D	control_14D	OK	346.357	88.5193	-1.9682	-3.54115	5e-05	0.00119833
Pp2A-29B	Pp2A-29B	Pp2A-29B	chr2L:8366037-8370090	opa RNAi_14D	control_14D	OK	99.5016	226.161	1.18456	2.54411	5e-05	0.00119833
PRL-1	PRL-1	PRL-1	chr2L:16245834-16257606	opa RNAi_14D	control_14D	OK	173.326	50.6494	-1.77488	-3.7346	5e-05	0.00119833
pum	pum	pum	chr3R:9066342-9237682	opa RNAi_14D	control_14D	OK	70.4464	22.731	-1.63186	-3.35876	5e-05	0.00119833
Pvf1	Pvf1	Pvf1	chrX:18832681-18842901	opa RNAi_14D	control_14D	OK	5.18284	0.228565	-4.50307	-3.94486	5e-05	0.00119833
Rab7	Rab7	Rab7	chr3R:23993007-23995452	opa RNAi_14D	control_14D	OK	711.116	231.709	-1.61777	-3.73229	5e-05	0.00119833
ranshi	ranshi	ranshi	chr3R:8726853-8729693	opa RNAi_14D	control_14D	OK	42.7525	5.83339	-2.8736	-4.05184	5e-05	0.00119833
Rat1	Rat1	Rat1	chr2L:6908082-6914138	opa RNAi_14D	control_14D	OK	39.6239	98.0814	1.30761	2.51695	5e-05	0.00119833
Rbp2	Rbp2	Rbp2	chrX:16448664-16454972	opa RNAi_14D	control_14D	OK	292.215	116.321	-1.32891	-2.95989	5e-05	0.00119833
rdhB	rdhB	rdhB	chr3R:22351695-22356264	opa RNAi_14D	control_14D	OK	0	0.568356	inf	#NAME?	5e-05	0.00119833
rec	rec	rec	chr3R:15804247-15832632	opa RNAi_14D	control_14D	OK	101.696	33.9647	-1.58215	-3.03709	5e-05	0.00119833
Ripalpha	Ripalpha	Ripalpha	chr2L:10199400-10200974	opa RNAi_14D	control_14D	OK	381.369	138.477	-1.46155	-2.94993	5e-05	0.00119833
rl	rl	rl	chr2R:1071461-1125927	opa RNAi_14D	control_14D	OK	248.041	66.0611	-1.90871	-3.57028	5e-05	0.00119833
roX2	roX2	roX2	chrX:11579064-11580432	opa RNAi_14D	control_14D	OK	0.605547	4.3181	2.83408	2.32247	5e-05	0.00119833
Rpd3	Rpd3	Rpd3	chr3L:4626601-4629467	opa RNAi_14D	control_14D	OK	68.4959	144.215	1.07413	2.21018	5e-05	0.00119833
Rpn10	Rpn10	Rpn10	chr3L:21536999-21538582	opa RNAi_14D	control_14D	OK	833.902	387.764	-1.1047	-2.60441	5e-05	0.00119833
Rpt6	Rpt6	Rpt6	chrX:21307585-21317663	opa RNAi_14D	control_14D	OK	1216.03	496.848	-1.2913	-3.05374	5e-05	0.00119833
Rrp47	Rrp47	Rrp47	chrX:15944896-15946249	opa RNAi_14D	control_14D	OK	551.81	276.146	-0.998738	-2.15804	5e-05	0.00119833
SamDC	SamDC	SamDC	chr2L:10339456-10341503	opa RNAi_14D	control_14D	OK	109.293	22.9857	-2.24939	-3.80342	5e-05	0.00119833
Sap-r	Sap-r	Sap-r	chr3R:30881791-30889062	opa RNAi_14D	control_14D	OK	81.8754	192.877	1.23618	2.6791	5e-05	0.00119833
scro	scro	scro	chr3L:24724161-24769123	opa RNAi_14D	control_14D	OK	11.2479	1.13308	-3.31134	-3.88749	5e-05	0.00119833
sds22	sds22	sds22	chr3R:17391501-17393020	opa RNAi_14D	control_14D	OK	325.691	119.182	-1.45033	-3.06388	5e-05	0.00119833
Sec22	Sec22	Sec22	chrX:806075-808200	opa RNAi_14D	control_14D	OK	38.5823	9.77622	-1.98059	-3.07292	5e-05	0.00119833
SelR	SelR	SelR	chr3R:10863354-10868642	opa RNAi_14D	control_14D	OK	164.953	54.2613	-1.60406	-2.88483	5e-05	0.00119833
Sgt1	Sgt1	Sgt1	chr3R:8304189-8305274	opa RNAi_14D	control_14D	OK	351.818	142.528	-1.30358	-2.67743	5e-05	0.00119833
shep	shep	shep	chr3L:5155820-5277944	opa RNAi_14D	control_14D	OK	12.1078	3.46815	-1.8037	-2.78962	5e-05	0.00119833
slam	slam	slam	chr2L:6372387-6377284	opa RNAi_14D	control_14D	OK	33.6435	8.53285	-1.97923	-3.2837	5e-05	0.00119833
snRNA:U1:82Eb	snRNA:U1:82Eb	snRNA:U1:82Eb	chr3R:4947932-4948096	opa RNAi_14D	control_14D	OK	152.932	19.635	-2.96139	-2.96153	5e-05	0.00119833
snRNA:U12:73B	snRNA:U12:73B	snRNA:U12:73B	chr3L:16648441-16661615	opa RNAi_14D	control_14D	OK	2987.22	683.362	-2.12808	-4.01472	5e-05	0.00119833
SP2637	SP2637	SP2637	chr2R:18640861-18658222	opa RNAi_14D	control_14D	OK	62.3215	14.4324	-2.11042	-3.20695	5e-05	0.00119833
Spf45	Spf45	Spf45	chr2L:23066873-23068386	opa RNAi_14D	control_14D	OK	226.181	79.1141	-1.51547	-2.97664	5e-05	0.00119833
spn-D	spn-D	spn-D	chr3R:27165715-27167122	opa RNAi_14D	control_14D	OK	38.7246	7.38204	-2.39116	-3.38712	5e-05	0.00119833
Spn43Aa	Spn43Aa	Spn43Aa	chr2R:7147691-7149677	opa RNAi_14D	control_14D	OK	0	4.14486	inf	#NAME?	5e-05	0.00119833
squ	squ	squ	chr2L:16680053-16699926	opa RNAi_14D	control_14D	OK	316.632	64.6487	-2.29211	-3.73634	5e-05	0.00119833
SrpRbeta	SrpRbeta	SrpRbeta	chr3L:8718948-8720225	opa RNAi_14D	control_14D	OK	94.488	37.2459	-1.34305	-2.22487	5e-05	0.00119833
srw	srw	srw	chr3L:4282955-4283478	opa RNAi_14D	control_14D	OK	184.499	62.6922	-1.55726	-2.57825	5e-05	0.00119833
Ssb-c31a	Ssb-c31a	Ssb-c31a	chr2L:8211346-8211938	opa RNAi_14D	control_14D	OK	955.235	391.983	-1.28507	-2.74381	5e-05	0.00119833
Stlk	Stlk	Stlk	chr2R:4546690-4565281	opa RNAi_14D	control_14D	OK	305.114	124.721	-1.29064	-2.71347	5e-05	0.00119833
sun	sun	sun	chrX:15847858-15849258	opa RNAi_14D	control_14D	OK	6248.12	2978.7	-1.06874	-2.47204	5e-05	0.00119833
Sxl	Sxl	Sxl	chrX:7074549-7098056	opa RNAi_14D	control_14D	OK	323.992	37.3902	-3.11523	-6.33789	5e-05	0.00119833
Syx13	Syx13	Syx13	chr3L:13044433-13046894	opa RNAi_14D	control_14D	OK	76.1156	28.505	-1.41698	-2.48283	5e-05	0.00119833
tan	tan	tan	chr3L:6055135-6057002	opa RNAi_14D	control_14D	OK	108.871	40.0967	-1.44107	-2.67582	5e-05	0.00119833
tef	tef	tef	chr2R:17054001-17059299	opa RNAi_14D	control_14D	OK	47.7825	16.18	-1.56227	-2.71629	5e-05	0.00119833
TfIIFbeta	TfIIFbeta	TfIIFbeta	chr3R:10761147-10767804	opa RNAi_14D	control_14D	OK	938.557	484.465	-0.954051	-2.14689	5e-05	0.00119833
Tim17b	Tim17b	Tim17b	chr3R:3734854-3745306	opa RNAi_14D	control_14D	OK	4853.61	2450.36	-0.986065	-2.28578	5e-05	0.00119833
Tina-1	Tina-1	Tina-1	chr2R:24940624-24942413	opa RNAi_14D	control_14D	OK	5.70986	0.797199	-2.84044	-2.73526	5e-05	0.00119833
tor	tor	tor	chr2R:7705182-7709184	opa RNAi_14D	control_14D	OK	7.54924	2.06626	-1.86931	-2.38396	5e-05	0.00119833
Trf4-2	Trf4-2	Trf4-2	chr3R:24925215-24927085	opa RNAi_14D	control_14D	OK	4.64751	0.98696	-2.23539	-2.51711	5e-05	0.00119833
twe	twe	twe	chr2L:16257687-16261877	opa RNAi_14D	control_14D	OK	139.58	10.8761	-3.68186	-5.31037	5e-05	0.00119833
UbcD6	UbcD6	UbcD6	chr3R:4948754-4952682	opa RNAi_14D	control_14D	OK	441.044	201.957	-1.12687	-2.39334	5e-05	0.00119833
Ubi-p5E	Ubi-p5E	Ubi-p5E	chrX:6276875-6279647	opa RNAi_14D	control_14D	OK	11.5571	65.2999	2.4983	4.19153	5e-05	0.00119833
Ubi-p63E	Ubi-p63E	Ubi-p63E	chr3L:3899258-3903184	opa RNAi_14D	control_14D	OK	0.363996	2.63295	2.85468	3.0374	5e-05	0.00119833
Ucrh	Ucrh	Ucrh	chr3L:25120708-25126171	opa RNAi_14D	control_14D	OK	14311.8	5640.29	-1.34336	-3.09185	5e-05	0.00119833
UGP	UGP	UGP	chr3L:9349608-9358935	opa RNAi_14D	control_14D	OK	24.8066	4.80522	-2.36805	-3.29912	5e-05	0.00119833
Vamp7	Vamp7	Vamp7	chr2R:9839775-9842502	opa RNAi_14D	control_14D	OK	88.6055	19.2165	-2.20505	-3.34195	5e-05	0.00119833
Vha36-1	Vha36-1	Vha36-1	chr2R:15541434-15542498	opa RNAi_14D	control_14D	OK	59.2098	14.6185	-2.01804	-3.11404	5e-05	0.00119833
yellow-e3	yellow-e3	yellow-e3	chr3R:13403422-13404870	opa RNAi_14D	control_14D	OK	5.68823	19.6206	1.78632	2.44302	5e-05	0.00119833
Yeti	Yeti	Yeti	chr2R:1343402-1345119	opa RNAi_14D	control_14D	OK	7302.87	3748.08	-0.962314	-2.16669	5e-05	0.00119833
Yippee	Yippee	Yippee	chrX:13385913-13387417	opa RNAi_14D	control_14D	OK	198.242	93.2636	-1.08788	-2.18687	5e-05	0.00119833
Z600	Z600	Z600	chr3L:15509060-15511047	opa RNAi_14D	control_14D	OK	9407.24	2974.01	-1.66136	-3.21771	5e-05	0.00119833
ZC3H3	ZC3H3	ZC3H3	chr3L:8507468-8509763	opa RNAi_14D	control_14D	OK	14.7393	40.8066	1.46914	2.49289	5e-05	0.00119833
zetaCOP	zetaCOP	zetaCOP	chr3L:16671663-16673555	opa RNAi_14D	control_14D	OK	675.396	252.149	-1.42146	-2.96878	5e-05	0.00119833
ZnT49B	ZnT49B	ZnT49B	chr2R:12652804-12655743	opa RNAi_14D	control_14D	OK	21.551	3.96027	-2.44408	-3.23898	5e-05	0.00119833
Arf102F	Arf102F	Arf102F	chr4:1124166-1125325	opa RNAi_14D	control_14D	OK	4956.46	2543.49	-0.9625	-2.26907	0.0001	0.00216093
CD98hc	CD98hc	CD98hc	chr3R:7974408-7978428	opa RNAi_14D	control_14D	OK	28.0095	70.868	1.33922	2.48011	0.0001	0.00216093
CG12163	CG12163	CG12163	chr3R:5237650-5251745	opa RNAi_14D	control_14D	OK	25.7902	66.396	1.36428	2.419	0.0001	0.00216093
CG13671	CG13671	CG13671	chr3L:8300063-8302341	opa RNAi_14D	control_14D	OK	0.328336	1.87216	2.51146	2.52433	0.0001	0.00216093
CG14100	CG14100	CG14100	chr3L:19586252-19590524	opa RNAi_14D	control_14D	OK	79.533	24.2338	-1.71453	-2.43549	0.0001	0.00216093
CG15027	CG15027	CG15027	chrX:15085158-15085827	opa RNAi_14D	control_14D	OK	267.027	110.408	-1.27414	-2.29704	0.0001	0.00216093
CG2051	CG2051	CG2051	chr3R:5781761-5789384	opa RNAi_14D	control_14D	OK	88.5807	35.6177	-1.3144	-2.39707	0.0001	0.00216093
CG31460	CG31460	CG31460	chr3R:8562672-8563798	opa RNAi_14D	control_14D	OK	269.246	108.594	-1.30998	-2.27078	0.0001	0.00216093
CG31957	CG31957	CG31957	chr2L:3867696-3872458	opa RNAi_14D	control_14D	OK	282.682	120.847	-1.226	-2.3301	0.0001	0.00216093
CG33469	CG33469	CG33469	chr2R:14605651-14606302	opa RNAi_14D	control_14D	OK	0.473959	0	#NAME?	#NAME?	0.0001	0.00216093
CG40498	CG40498	CG40498	chr2R:924635-951252	opa RNAi_14D	control_14D	OK	17.602	4.10433	-2.10052	-2.63691	0.0001	0.00216093
CG43320	CG43320	CG43320	chr3R:27695254-27696451	opa RNAi_14D	control_14D	OK	9.75628	2.00191	-2.28495	-2.64219	0.0001	0.00216093
CG4692	CG4692	CG4692	chr2R:24597994-24599821	opa RNAi_14D	control_14D	OK	3952.42	2145.41	-0.881481	-2.1113	0.0001	0.00216093
CG7692	CG7692	CG7692	chr3L:17352418-17358056	opa RNAi_14D	control_14D	OK	0.772514	2.90463	1.91072	2.4909	0.0001	0.00216093
CG8728	CG8728	CG8728	chr2R:7936865-7939114	opa RNAi_14D	control_14D	OK	0.875872	4.11057	2.23055	2.51731	0.0001	0.00216093
CG9609	CG9609	CG9609	chrX:16785114-16787008	opa RNAi_14D	control_14D	OK	8.58644	2.43466	-1.81834	-2.2971	0.0001	0.00216093
chrb	chrb	chrb	chr3L:11487549-11499055	opa RNAi_14D	control_14D	OK	7.57768	18.4075	1.28046	2.2248	0.0001	0.00216093
CR43264	CR43264	CR43264	chrX:5818558-5840823	opa RNAi_14D	control_14D	OK	98.6803	29.4734	-1.74335	-2.24324	0.0001	0.00216093
Det	Det	Det	chr3R:17149666-17150455	opa RNAi_14D	control_14D	OK	1059.29	544.435	-0.960271	-2.12417	0.0001	0.00216093
eas	eas	eas	chrX:16278327-16285618	opa RNAi_14D	control_14D	OK	16.1145	4.28308	-1.91164	-2.6159	0.0001	0.00216093
fj	fj	fj	chr2R:18232760-18236311	opa RNAi_14D	control_14D	OK	9.9218	24.9799	1.33209	2.23809	0.0001	0.00216093
Jafrac1	Jafrac1	Jafrac1	chrX:13329823-13331994	opa RNAi_14D	control_14D	OK	473.753	236.894	-0.999895	-2.11293	0.0001	0.00216093
mdlc	mdlc	mdlc	chr3R:20056417-20059750	opa RNAi_14D	control_14D	OK	151.088	39.2686	-1.94394	-2.52504	0.0001	0.00216093
mei-S332	mei-S332	mei-S332	chr2R:22106106-22124566	opa RNAi_14D	control_14D	OK	110.853	49.4533	-1.16452	-2.171	0.0001	0.00216093
mRpL17	mRpL17	mRpL17	chr3L:264778-265932	opa RNAi_14D	control_14D	OK	191.074	78.6552	-1.28052	-2.3475	0.0001	0.00216093
NUCB1	NUCB1	NUCB1	chr3L:17797737-17802279	opa RNAi_14D	control_14D	OK	130.933	259.182	0.985137	2.2007	0.0001	0.00216093
Oxp	Oxp	Oxp	chr2R:17604950-17639138	opa RNAi_14D	control_14D	OK	263.952	31.0101	-3.08946	-2.98434	0.0001	0.00216093
Pole2	Pole2	Pole2	chr3L:5895690-5897435	opa RNAi_14D	control_14D	OK	1.24108	6.29696	2.34306	2.6424	0.0001	0.00216093
Pp4-19C	Pp4-19C	Pp4-19C	chrX:20421086-20424002	opa RNAi_14D	control_14D	OK	29.0752	69.7	1.26137	2.24511	0.0001	0.00216093
Pur-alpha	Pur-alpha	Pur-alpha	chr4:558015-567257	opa RNAi_14D	control_14D	OK	205.107	83.7269	-1.29261	-2.50677	0.0001	0.00216093
Rbf2	Rbf2	Rbf2	chr3R:15965445-15972913	opa RNAi_14D	control_14D	OK	11.0449	32.9411	1.57651	2.311	0.0001	0.00216093
RIOK1	RIOK1	RIOK1	chr3L:11646233-11648474	opa RNAi_14D	control_14D	OK	21.8983	7.71821	-1.50448	-2.2025	0.0001	0.00216093
Sgf11	Sgf11	Sgf11	chr3L:18681036-18681836	opa RNAi_14D	control_14D	OK	194.34	81.4864	-1.25395	-2.32473	0.0001	0.00216093
Sp7	Sp7	Sp7	chr3R:7759785-7763573	opa RNAi_14D	control_14D	OK	4.32994	0.844524	-2.35814	-2.50501	0.0001	0.00216093
Spx	Spx	Spx	chrX:6255821-6257596	opa RNAi_14D	control_14D	OK	10.3727	29.8354	1.52423	2.29659	0.0001	0.00216093
Vha68-1	Vha68-1	Vha68-1	chr2L:13000769-13004107	opa RNAi_14D	control_14D	OK	0.805236	3.83699	2.25249	2.64815	0.0001	0.00216093
Aats-phe	Aats-phe	Aats-phe	chr2R:13968307-13969902	opa RNAi_14D	control_14D	OK	4.59732	13.5752	1.56211	2.15837	0.00015	0.00297331
Atac3	Atac3	Atac3	chr3L:324984-327992	opa RNAi_14D	control_14D	OK	2.67997	9.13807	1.76967	2.32399	0.00015	0.00297331
betaTub56D	betaTub56D	betaTub56D	chr2R:19447318-19451600	opa RNAi_14D	control_14D	OK	123.093	249.813	1.0211	2.13204	0.00015	0.00297331
CG10418	CG10418	CG10418	chr3L:12336675-12337236	opa RNAi_14D	control_14D	OK	1859.59	945.337	-0.976081	-2.16416	0.00015	0.00297331
CG12868	CG12868	CG12868	chr2R:14604548-14605297	opa RNAi_14D	control_14D	OK	41.8602	11.2338	-1.89773	-2.48574	0.00015	0.00297331
CG13994	CG13994	CG13994	chr2L:6062988-6065953	opa RNAi_14D	control_14D	OK	1529.75	777.636	-0.976126	-2.11807	0.00015	0.00297331
CG1463	CG1463	CG1463	chrX:12609976-12611667	opa RNAi_14D	control_14D	OK	414.662	200.953	-1.04508	-2.26087	0.00015	0.00297331
CG15882	CG15882	CG15882	chrX:19123754-19124388	opa RNAi_14D	control_14D	OK	0.514585	0	#NAME?	#NAME?	0.00015	0.00297331
CG1789	CG1789	CG1789	chrX:8720519-8721503	opa RNAi_14D	control_14D	OK	280.136	130.963	-1.09697	-2.2063	0.00015	0.00297331
CG1885	CG1885	CG1885	chrX:8898553-8900264	opa RNAi_14D	control_14D	OK	21.9353	7.59955	-1.52927	-2.2003	0.00015	0.00297331
CG31633	CG31633	CG31633	chr2L:6654759-6656321	opa RNAi_14D	control_14D	OK	26.5162	9.45325	-1.48799	-2.20697	0.00015	0.00297331
CG3702	CG3702	CG3702	chr2L:4224649-4227097	opa RNAi_14D	control_14D	OK	6.97926	17.9657	1.3641	2.0767	0.00015	0.00297331
CG42644	CG42644	CG42644	chr2R:432218-439012	opa RNAi_14D	control_14D	OK	35.8899	7.87899	-2.1875	-2.3216	0.00015	0.00297331
CG6726	CG6726	CG6726	chr3R:23070515-23112730	opa RNAi_14D	control_14D	OK	5.52814	17.4514	1.65848	2.37909	0.00015	0.00297331
CG8490	CG8490	CG8490	chr2R:12335315-12336205	opa RNAi_14D	control_14D	OK	194.734	82.4638	-1.23967	-2.26814	0.00015	0.00297331
CG8498	CG8498	CG8498	chr2L:8159831-8162452	opa RNAi_14D	control_14D	OK	540.551	201.859	-1.42109	-2.44962	0.00015	0.00297331
CG9328	CG9328	CG9328	chr2L:20797714-20814331	opa RNAi_14D	control_14D	OK	74.9397	31.5599	-1.24764	-2.19343	0.00015	0.00297331
CG9921	CG9921	CG9921	chrX:16331280-16333600	opa RNAi_14D	control_14D	OK	223.905	97.0961	-1.2054	-2.18645	0.00015	0.00297331
ci	ci	ci	chr4:47709-63124	opa RNAi_14D	control_14D	OK	27.6244	61.0628	1.14435	2.18218	0.00015	0.00297331
Dsp1	Dsp1	Dsp1	chrX:16333611-16340624	opa RNAi_14D	control_14D	OK	140.712	281.292	0.999318	2.21642	0.00015	0.00297331
eve	eve	eve	chr2R:9976995-9980795	opa RNAi_14D	control_14D	OK	10.4149	33.5635	1.68825	2.43251	0.00015	0.00297331
ghi	ghi	ghi	chr3L:9451875-9452790	opa RNAi_14D	control_14D	OK	845.81	442.738	-0.93388	-2.05132	0.00015	0.00297331
Ir68a	Ir68a	Ir68a	chr3L:11232971-11236218	opa RNAi_14D	control_14D	OK	1.30747	4.81178	1.87979	2.35607	0.00015	0.00297331
L	L	L	chr2R:14481186-14497312	opa RNAi_14D	control_14D	OK	2.14715	7.12755	1.73098	2.245	0.00015	0.00297331
Mipp1	Mipp1	Mipp1	chr3L:16563447-16573334	opa RNAi_14D	control_14D	OK	3.84237	16.2098	2.0768	2.83301	0.00015	0.00297331
Mis12	Mis12	Mis12	chr3L:6968034-6969048	opa RNAi_14D	control_14D	OK	55.8703	15.2324	-1.87493	-2.53812	0.00015	0.00297331
mRpL14	mRpL14	mRpL14	chrX:2343996-2344649	opa RNAi_14D	control_14D	OK	614.909	301.38	-1.02879	-2.16181	0.00015	0.00297331
mRpL54	mRpL54	mRpL54	chr2R:21060788-21061587	opa RNAi_14D	control_14D	OK	859.16	433.816	-0.985845	-2.17598	0.00015	0.00297331
Rab30	Rab30	Rab30	chr2L:7030492-7032606	opa RNAi_14D	control_14D	OK	35.2704	13.184	-1.41967	-2.17394	0.00015	0.00297331
sel	sel	sel	chr2R:10050347-10052167	opa RNAi_14D	control_14D	OK	123.484	50.8189	-1.28088	-2.29335	0.00015	0.00297331
SmG	SmG	SmG	chrX:16639809-16640419	opa RNAi_14D	control_14D	OK	1649.36	787.383	-1.06677	-2.32745	0.00015	0.00297331
TM9SF4	TM9SF4	TM9SF4	chr2L:13746951-13773905	opa RNAi_14D	control_14D	OK	4.17556	12.3023	1.55889	2.20939	0.00015	0.00297331
Tsp3A	Tsp3A	Tsp3A	chrX:2617757-2619738	opa RNAi_14D	control_14D	OK	17.1565	6.02885	-1.5088	-2.20923	0.00015	0.00297331
bru-3	bru-3	bru-3	chr3L:13521906-13803400	opa RNAi_14D	control_14D	OK	1.34754	4.19801	1.63938	2.05627	0.0002	0.00384866
CanB2	CanB2	CanB2	chr2R:7786009-7789053	opa RNAi_14D	control_14D	OK	67.8173	27.2221	-1.31687	-2.1158	0.0002	0.00384866
cav	cav	cav	chr3R:24196892-24226934	opa RNAi_14D	control_14D	OK	256.6	110.782	-1.2118	-2.21421	0.0002	0.00384866
CG11180	CG11180	CG11180	chr2R:20618502-20623429	opa RNAi_14D	control_14D	OK	139.484	66.5317	-1.06798	-2.13621	0.0002	0.00384866
CG15432	CG15432	CG15432	chr2L:4442319-4444680	opa RNAi_14D	control_14D	OK	693.083	324.794	-1.09351	-2.12319	0.0002	0.00384866
CG2574	CG2574	CG2574	chrX:12408860-12409825	opa RNAi_14D	control_14D	OK	0.661308	0	#NAME?	#NAME?	0.0002	0.00384866
CG32214	CG32214	CG32214	chr3L:19467345-19468160	opa RNAi_14D	control_14D	OK	0.64921	0	#NAME?	#NAME?	0.0002	0.00384866
CG32817	CG32817	CG32817	chrX:479065-480166	opa RNAi_14D	control_14D	OK	14.8983	3.22998	-2.20555	-2.53815	0.0002	0.00384866
CG6597	CG6597	CG6597	chr3L:20297128-20309511	opa RNAi_14D	control_14D	OK	334.379	162.873	-1.03774	-2.21519	0.0002	0.00384866
Sap30	Sap30	Sap30	chrX:16787282-16791266	opa RNAi_14D	control_14D	OK	512.163	267.954	-0.934619	-2.07855	0.0002	0.00384866
spn-F	spn-F	spn-F	chr3R:31255126-31256659	opa RNAi_14D	control_14D	OK	104.072	44.1911	-1.23576	-2.3006	0.0002	0.00384866
tsg	tsg	tsg	chrX:11988061-11988948	opa RNAi_14D	control_14D	OK	168.464	76.1238	-1.14602	-2.09468	0.0002	0.00384866
Bap60	Bap60	Bap60	chrX:13157444-13159508	opa RNAi_14D	control_14D	OK	117.776	252.333	1.09928	2.31359	0.00025	0.00457697
BEAF-32	BEAF-32	BEAF-32	chr2R:14769598-14772630	opa RNAi_14D	control_14D	OK	448.889	216.911	-1.04926	-2.2368	0.00025	0.00457697
CG10013	CG10013	CG10013	chr3R:12323520-12325210	opa RNAi_14D	control_14D	OK	39.7316	16.0511	-1.30761	-2.08383	0.00025	0.00457697
CG10809	CG10809	CG10809	chr3L:9857382-9859889	opa RNAi_14D	control_14D	OK	4.9462	14.0716	1.50839	2.14921	0.00025	0.00457697
CG14817	CG14817	CG14817	chrX:1873852-1877270	opa RNAi_14D	control_14D	OK	644.764	269.813	-1.25681	-2.17695	0.00025	0.00457697
CG16721	CG16721	CG16721	chrX:5879868-5899989	opa RNAi_14D	control_14D	OK	2.6114	12.326	2.23881	2.65209	0.00025	0.00457697
CG17684	CG17684	CG17684	chr2R:1866079-2262115	opa RNAi_14D	control_14D	OK	7.74056	2.09808	-1.88337	-2.41123	0.00025	0.00457697
CG1971	CG1971	CG1971	chr3R:31805467-31806769	opa RNAi_14D	control_14D	OK	81.5847	32.151	-1.34343	-2.20033	0.00025	0.00457697
CG40160	CG40160	CG40160	chr3L:26215814-26229433	opa RNAi_14D	control_14D	OK	101.813	40.7208	-1.32208	-2.32447	0.00025	0.00457697
CG5446	CG5446	CG5446	chr2L:12426630-12427709	opa RNAi_14D	control_14D	OK	1064.62	562.021	-0.92164	-2.04537	0.00025	0.00457697
CG7357	CG7357	CG7357	chr3R:17807406-17809222	opa RNAi_14D	control_14D	OK	170.494	80.3519	-1.08532	-2.18823	0.00025	0.00457697
dsh	dsh	dsh	chrX:11355880-11358724	opa RNAi_14D	control_14D	OK	6.71399	2.12812	-1.65759	-2.15708	0.00025	0.00457697
l(2)41Ab	l(2)41Ab	l(2)41Ab	chr2R:1349391-1443935	opa RNAi_14D	control_14D	OK	22.2886	3.05837	-2.86547	-3.09018	0.00025	0.00457697
lin-52	lin-52	lin-52	chrX:5752248-5754958	opa RNAi_14D	control_14D	OK	189.844	79.3343	-1.2588	-2.27075	0.00025	0.00457697
Lsp1beta	Lsp1beta	Lsp1beta	chr2L:898499-901316	opa RNAi_14D	control_14D	OK	1.08117	0.0838271	-3.68903	-2.62827	0.00025	0.00457697
mof	mof	mof	chrX:5873839-5876853	opa RNAi_14D	control_14D	OK	5.33646	15.701	1.5569	2.39289	0.00025	0.00457697
Nlg4	Nlg4	Nlg4	chr3R:20204808-20245473	opa RNAi_14D	control_14D	OK	0.309235	1.08415	1.80979	2.10144	0.00025	0.00457697
pncr013:4	pncr013:4	pncr013:4	chr4:467496-488994	opa RNAi_14D	control_14D	OK	428.943	164.051	-1.38664	-2.35213	0.00025	0.00457697
Rca1	Rca1	Rca1	chr2L:6852314-6853866	opa RNAi_14D	control_14D	OK	2.65885	10.1654	1.9348	2.4138	0.00025	0.00457697
Sas-4	Sas-4	Sas-4	chr3R:7151366-7154219	opa RNAi_14D	control_14D	OK	0.991463	3.40648	1.78065	2.1834	0.00025	0.00457697
Tl	Tl	Tl	chr3R:26799040-26842403	opa RNAi_14D	control_14D	OK	17.4087	7.00627	-1.31309	-2.22701	0.00025	0.00457697
Alg-2	Alg-2	Alg-2	chr3R:3623142-3627690	opa RNAi_14D	control_14D	OK	361.236	180.791	-0.998621	-2.17567	0.0003	0.00529621
CG10306	CG10306	CG10306	chr2R:21685282-21687642	opa RNAi_14D	control_14D	OK	3118.32	1630.83	-0.935167	-2.2146	0.0003	0.00529621
CG2269	CG2269	CG2269	chr2R:10085168-10096416	opa RNAi_14D	control_14D	OK	0.0929068	1.11247	3.58183	2.14423	0.0003	0.00529621
CG42455	CG42455	CG42455	chr3L:9972311-9974023	opa RNAi_14D	control_14D	OK	207.915	56.2887	-1.88507	-2.43024	0.0003	0.00529621
CG4598	CG4598	CG4598	chr2L:9918617-9920120	opa RNAi_14D	control_14D	OK	87.309	35.6073	-1.29396	-2.25042	0.0003	0.00529621
CG5235	CG5235	CG5235	chr3L:16087626-16090392	opa RNAi_14D	control_14D	OK	311.533	168.135	-0.889763	-2.06407	0.0003	0.00529621
CG8177	CG8177	CG8177	chr3L:9763543-9786466	opa RNAi_14D	control_14D	OK	5.73777	1.91026	-1.58672	-2.05523	0.0003	0.00529621
Coprox	Coprox	Coprox	chr2L:6964420-6965887	opa RNAi_14D	control_14D	OK	2.59024	8.44778	1.70549	2.11899	0.0003	0.00529621
dpr6	dpr6	dpr6	chr3L:9974650-10139360	opa RNAi_14D	control_14D	OK	1.39184	0.246723	-2.49603	-2.19898	0.0003	0.00529621
egh	egh	egh	chrX:2588502-2599111	opa RNAi_14D	control_14D	OK	42.171	19.2161	-1.13394	-2.09457	0.0003	0.00529621
GPHR	GPHR	GPHR	chr2R:15199064-15201200	opa RNAi_14D	control_14D	OK	39.6358	16.3455	-1.27791	-2.08853	0.0003	0.00529621
mth	mth	mth	chr3L:328096-356050	opa RNAi_14D	control_14D	OK	14.7843	46.4236	1.65079	2.407	0.0003	0.00529621
NetA	NetA	NetA	chrX:14604011-14653928	opa RNAi_14D	control_14D	OK	27.3294	11.4225	-1.25857	-2.06389	0.0003	0.00529621
sina	sina	sina	chr3L:16852526-16862517	opa RNAi_14D	control_14D	OK	229.354	114.518	-1.00201	-2.17813	0.0003	0.00529621
Syx7	Syx7	Syx7	chr3L:21445833-21448128	opa RNAi_14D	control_14D	OK	33.5507	13.0731	-1.35974	-2.08232	0.0003	0.00529621
Unr	Unr	Unr	chr3L:8432321-8442381	opa RNAi_14D	control_14D	OK	50.4553	25.6469	-0.976223	-2.08841	0.0003	0.00529621
cag	cag	cag	chr2R:10886809-10894414	opa RNAi_14D	control_14D	OK	37.0032	8.95289	-2.04722	-2.28899	0.00035	0.00594024
Cdc5	Cdc5	Cdc5	chr3L:357850-361383	opa RNAi_14D	control_14D	OK	1.98898	7.19125	1.85421	2.24753	0.00035	0.00594024
CG1024	CG1024	CG1024	chr3R:6377348-6380328	opa RNAi_14D	control_14D	OK	46.6169	18.1198	-1.36329	-2.31077	0.00035	0.00594024
CG10863	CG10863	CG10863	chr3L:3940518-3942465	opa RNAi_14D	control_14D	OK	43.7909	16.9537	-1.36903	-2.04925	0.00035	0.00594024
CG11456	CG11456	CG11456	chr3L:20841986-20885188	opa RNAi_14D	control_14D	OK	10.437	3.36357	-1.63364	-1.99397	0.00035	0.00594024
CG1161	CG1161	CG1161	chr3R:5355091-5356748	opa RNAi_14D	control_14D	OK	365.407	187.914	-0.959433	-2.00551	0.00035	0.00594024
GstT2	GstT2	GstT2	chr2R:9607291-9610290	opa RNAi_14D	control_14D	OK	30.9994	8.42712	-1.87913	-2.2695	0.00035	0.00594024
Hsl	Hsl	Hsl	chr2R:20257649-20261726	opa RNAi_14D	control_14D	OK	2.04651	0.491554	-2.05774	-2.08898	0.00035	0.00594024
Mcm7	Mcm7	Mcm7	chr3L:8891595-8894310	opa RNAi_14D	control_14D	OK	29.1049	65.6237	1.17296	2.21422	0.00035	0.00594024
Mco1	Mco1	Mco1	chr2L:9416587-9426342	opa RNAi_14D	control_14D	OK	0.326667	1.54881	2.24527	2.27584	0.00035	0.00594024
MED4	MED4	MED4	chr3L:7249528-7250527	opa RNAi_14D	control_14D	OK	253.109	122.357	-1.04866	-2.08861	0.00035	0.00594024
Mob3	Mob3	Mob3	chr2L:10265335-10266570	opa RNAi_14D	control_14D	OK	232.064	109.558	-1.08282	-2.12713	0.00035	0.00594024
mRpL52	mRpL52	mRpL52	chr2R:7673720-7674400	opa RNAi_14D	control_14D	OK	968.424	506.638	-0.934683	-2.038	0.00035	0.00594024
msl-3	msl-3	msl-3	chr3L:7094817-7125533	opa RNAi_14D	control_14D	OK	2.80834	10.5882	1.91467	2.37792	0.00035	0.00594024
Prosalpha3	Prosalpha3	Prosalpha3	chr2R:20994899-20996118	opa RNAi_14D	control_14D	OK	1994.02	1082.76	-0.880966	-2.08377	0.00035	0.00594024
Rlip	Rlip	Rlip	chr3R:21017683-21020753	opa RNAi_14D	control_14D	OK	1.17778	4.28075	1.86179	2.21719	0.00035	0.00594024
Sgf29	Sgf29	Sgf29	chr2R:21292238-21293646	opa RNAi_14D	control_14D	OK	144.191	63.1086	-1.19207	-2.23696	0.00035	0.00594024
Tom40	Tom40	Tom40	chrX:7736892-7739978	opa RNAi_14D	control_14D	OK	23.2977	60.1141	1.36752	2.31995	0.00035	0.00594024
CG10914	CG10914	CG10914	chr2R:18158256-18160310	opa RNAi_14D	control_14D	OK	2.80751	8.63881	1.62154	2.13464	0.0004	0.00659083
CG11034	CG11034	CG11034	chr2L:5805394-5809063	opa RNAi_14D	control_14D	OK	1.61754	0.252199	-2.68116	-2.37116	0.0004	0.00659083
CG11984	CG11984	CG11984	chr3R:9010281-9014909	opa RNAi_14D	control_14D	OK	2.86791	0.692785	-2.04952	-2.14851	0.0004	0.00659083
CG13760	CG13760	CG13760	chrX:2580957-2585699	opa RNAi_14D	control_14D	OK	3.14115	0.395079	-2.99108	-2.41672	0.0004	0.00659083
CG17883	CG17883	CG17883	chr2R:4671852-4673639	opa RNAi_14D	control_14D	OK	188.059	92.7051	-1.02047	-2.06192	0.0004	0.00659083
CG18766	CG18766	CG18766	chr3R:27242334-27245249	opa RNAi_14D	control_14D	OK	5.33227	16.1046	1.59465	2.17143	0.0004	0.00659083
CG3448	CG3448	CG3448	chr3L:9446863-9451572	opa RNAi_14D	control_14D	OK	127.231	54.7252	-1.21717	-2.21202	0.0004	0.00659083
CG42709	CG42709	CG42709	chr3L:12784428-12805116	opa RNAi_14D	control_14D	OK	22.3695	62.5748	1.48405	2.32201	0.0004	0.00659083
CG44532	CG44532	CG44532	chrX:9162091-9163153	opa RNAi_14D	control_14D	OK	13.8712	4.28066	-1.69618	-1.98549	0.0004	0.00659083
CR42861	CR42861	CR42861	chrX:13744927-13745476	opa RNAi_14D	control_14D	OK	63.3547	22.2005	-1.51286	-2.17277	0.0004	0.00659083
GstZ1	GstZ1	GstZ1	chr3R:9455516-9456546	opa RNAi_14D	control_14D	OK	411.98	217.093	-0.924261	-1.95467	0.0004	0.00659083
MED25	MED25	MED25	chr3R:20008946-20011712	opa RNAi_14D	control_14D	OK	0.689236	2.70279	1.97138	2.24332	0.0004	0.00659083
Pex1	Pex1	Pex1	chr3L:14071891-14083229	opa RNAi_14D	control_14D	OK	2.13462	6.64627	1.63856	2.13675	0.0004	0.00659083
vito	vito	vito	chr3L:5776323-5777333	opa RNAi_14D	control_14D	OK	410.107	206.2	-0.991953	-2.09508	0.0004	0.00659083
CG14427	CG14427	CG14427	chrX:7021607-7066052	opa RNAi_14D	control_14D	OK	1806.56	1013.75	-0.833538	-1.99761	0.00045	0.00721917
CG17681	CG17681	CG17681	chr2L:18153122-18154516	opa RNAi_14D	control_14D	OK	0.767528	3.49437	2.18674	2.234	0.00045	0.00721917
Clbn	Clbn	Clbn	chr3R:25127501-25131155	opa RNAi_14D	control_14D	OK	4.47772	13.0102	1.5388	2.24433	0.00045	0.00721917
Drep-1	Drep-1	Drep-1	chr2R:12044611-12050172	opa RNAi_14D	control_14D	OK	43.4973	20.1343	-1.11127	-1.94064	0.00045	0.00721917
gbb	gbb	gbb	chr2R:23851561-23853247	opa RNAi_14D	control_14D	OK	19.3028	48.4046	1.32634	2.20803	0.00045	0.00721917
GstO1	GstO1	GstO1	chr3L:8523741-8524866	opa RNAi_14D	control_14D	OK	135.938	61.4889	-1.14456	-2.05915	0.00045	0.00721917
Mlc-c	Mlc-c	Mlc-c	chrX:5619135-5622539	opa RNAi_14D	control_14D	OK	145.932	295.885	1.01974	2.16598	0.00045	0.00721917
NimC4	NimC4	NimC4	chr2L:14040169-14094401	opa RNAi_14D	control_14D	OK	1.16577	6.35244	2.44603	2.366	0.00045	0.00721917
Pect	Pect	Pect	chr2L:13203761-13211814	opa RNAi_14D	control_14D	OK	97.6028	46.6695	-1.06444	-2.09711	0.00045	0.00721917
prd	prd	prd	chr2L:12082994-12086413	opa RNAi_14D	control_14D	OK	2.05877	6.5626	1.67249	2.179	0.00045	0.00721917
RhoGAP18B	RhoGAP18B	RhoGAP18B	chrX:19136106-19167082	opa RNAi_14D	control_14D	OK	8.16756	2.24701	-1.8619	-2.16833	0.00045	0.00721917
RpLP2	RpLP2	RpLP2	chr2R:16586128-16586732	opa RNAi_14D	control_14D	OK	8873.31	4864.93	-0.867053	-2.04828	0.00045	0.00721917
UK114	UK114	UK114	chr2L:15274180-15275091	opa RNAi_14D	control_14D	OK	582.722	293.125	-0.991295	-2.05908	0.00045	0.00721917
AdSS	AdSS	AdSS	chr3R:20824666-20830580	opa RNAi_14D	control_14D	OK	48.9145	99.1702	1.01965	1.95916	0.0005	0.00789321
CG13896	CG13896	CG13896	chr3L:710819-711850	opa RNAi_14D	control_14D	OK	15.8672	4.28034	-1.89025	-2.21516	0.0005	0.00789321
CG2147	CG2147	CG2147	chrX:8240683-8241483	opa RNAi_14D	control_14D	OK	32.6683	11.3073	-1.53063	-2.12953	0.0005	0.00789321
CG5037	CG5037	CG5037	chr2L:10331470-10333129	opa RNAi_14D	control_14D	OK	129.291	62.8977	-1.03954	-1.99887	0.0005	0.00789321
CG5734	CG5734	CG5734	chr2L:10204756-10206961	opa RNAi_14D	control_14D	OK	3.2643	9.19642	1.4943	2.08692	0.0005	0.00789321
CG5776	CG5776	CG5776	chr2L:12700948-12704451	opa RNAi_14D	control_14D	OK	0.520484	2.01983	1.95631	2.212	0.0005	0.00789321
pio	pio	pio	chr2R:24581244-24597862	opa RNAi_14D	control_14D	OK	0.322388	1.54538	2.26109	2.10459	0.0005	0.00789321
Spp	Spp	Spp	chr2L:542785-544653	opa RNAi_14D	control_14D	OK	30.7071	70.0024	1.18883	2.11352	0.0005	0.00789321
aos	aos	aos	chr3L:16419596-16543370	opa RNAi_14D	control_14D	OK	6.06821	21.5457	1.82806	2.4253	0.00055	0.00841383
Cbp20	Cbp20	Cbp20	chr3R:18164660-18165439	opa RNAi_14D	control_14D	OK	1407.27	745.642	-0.916342	-2.084	0.00055	0.00841383
CG1275	CG1275	CG1275	chr3L:2252743-2257423	opa RNAi_14D	control_14D	OK	7.95366	21.2855	1.42018	2.06915	0.00055	0.00841383
CG32767	CG32767	CG32767	chrX:5071026-5084768	opa RNAi_14D	control_14D	OK	32.2668	15.9714	-1.01456	-1.96016	0.00055	0.00841383
CG34200	CG34200	CG34200	chr2R:5757661-5760407	opa RNAi_14D	control_14D	OK	873.499	413.466	-1.07904	-2.00065	0.00055	0.00841383
CG5022	CG5022	CG5022	chr2L:10344441-10347706	opa RNAi_14D	control_14D	OK	0.184796	1.55964	3.07721	2.76806	0.00055	0.00841383
CG6985	CG6985	CG6985	chr3R:22741149-22745581	opa RNAi_14D	control_14D	OK	41.7269	15.482	-1.43038	-2.07716	0.00055	0.00841383
CG9399	CG9399	CG9399	chr3R:9571910-9574211	opa RNAi_14D	control_14D	OK	110.527	48.0865	-1.2007	-2.07263	0.00055	0.00841383
CR44263	CR44263	CR44263	chr3R:31758709-31759360	opa RNAi_14D	control_14D	OK	9.25882	0.652987	-3.8257	-2.92767	0.00055	0.00841383
Crk	Crk	Crk	chr4:210223-213165	opa RNAi_14D	control_14D	OK	1718.14	959.544	-0.840424	-1.93809	0.00055	0.00841383
gnu	gnu	gnu	chr3L:14802379-14803360	opa RNAi_14D	control_14D	OK	115.775	50.5139	-1.19658	-1.97923	0.00055	0.00841383
Ilk	Ilk	Ilk	chr3L:21216900-21219240	opa RNAi_14D	control_14D	OK	135.309	53.6364	-1.33497	-1.98094	0.00055	0.00841383
MED10	MED10	MED10	chr3L:16232083-16232777	opa RNAi_14D	control_14D	OK	1678.1	929.986	-0.851544	-1.92879	0.00055	0.00841383
nAChRalpha4	nAChRalpha4	nAChRalpha4	chr3L:23206668-23287448	opa RNAi_14D	control_14D	OK	142.148	66.2442	-1.10152	-2.0851	0.00055	0.00841383
Ptp99A	Ptp99A	Ptp99A	chr3R:29377645-29489265	opa RNAi_14D	control_14D	OK	0.0989302	0.674256	2.76881	2.24328	0.00055	0.00841383
Vha13	Vha13	Vha13	chr3R:19643017-19644386	opa RNAi_14D	control_14D	OK	525.051	264.255	-0.990527	-2.08183	0.00055	0.00841383
cathD	cathD	cathD	chr2R:7822110-7823569	opa RNAi_14D	control_14D	OK	58.2869	123.609	1.08454	2.05761	0.0006	0.00905611
CG15601	CG15601	CG15601	chrX:15710646-15712309	opa RNAi_14D	control_14D	OK	69.5254	29.0354	-1.25973	-2.04522	0.0006	0.00905611
CG15766	CG15766	CG15766	chrX:5814863-5815820	opa RNAi_14D	control_14D	OK	3.63814	0.37018	-3.2969	-2.77188	0.0006	0.00905611
CG18528	CG18528	CG18528	chr3R:24358094-24360144	opa RNAi_14D	control_14D	OK	5.0957	15.5186	1.60664	2.17673	0.0006	0.00905611
CG7101	CG7101	CG7101	chrX:18830590-18832123	opa RNAi_14D	control_14D	OK	19.4013	7.49068	-1.37298	-2.00494	0.0006	0.00905611
klg	klg	klg	chr3R:22899283-22961731	opa RNAi_14D	control_14D	OK	0.463879	2.2581	2.28329	2.34985	0.0006	0.00905611
tkv	tkv	tkv	chr2L:5216700-5271384	opa RNAi_14D	control_14D	OK	19.6932	8.22555	-1.25952	-2.06242	0.0006	0.00905611
CG14965	CG14965	CG14965	chr3L:3189977-3192491	opa RNAi_14D	control_14D	OK	90.77	43.8536	-1.04952	-2.00009	0.00065	0.00960907
CR45631	CR45631	CR45631	chr3R:16428303-16428976	opa RNAi_14D	control_14D	OK	23.781	7.72751	-1.62174	-2.05242	0.00065	0.00960907
CtBP	CtBP	CtBP	chr3R:13011648-13026275	opa RNAi_14D	control_14D	OK	66.7291	132.76	0.992431	2.0448	0.00065	0.00960907
Mcm10	Mcm10	Mcm10	chr2L:21179932-21198762	opa RNAi_14D	control_14D	OK	10.8095	27.6515	1.35506	2.08394	0.00065	0.00960907
PSR	PSR	PSR	chr3R:22360781-22362371	opa RNAi_14D	control_14D	OK	7.45111	21.2566	1.51238	2.15278	0.00065	0.00960907
qjt	qjt	qjt	chr3L:17479095-17486230	opa RNAi_14D	control_14D	OK	9.16979	1.15059	-2.99452	-2.62481	0.00065	0.00960907
RpL41	RpL41	RpL41	chr2R:24891613-24928275	opa RNAi_14D	control_14D	OK	17560.2	9700.32	-0.856208	-1.93901	0.00065	0.00960907
Sdr	Sdr	Sdr	chr3R:14918627-14923083	opa RNAi_14D	control_14D	OK	1.88292	5.25527	1.4808	2.00315	0.00065	0.00960907
tai	tai	tai	chr2L:9166777-9251042	opa RNAi_14D	control_14D	OK	0.237516	1.12814	2.24785	2.37667	0.00065	0.00960907
Tmhs	Tmhs	Tmhs	chr3L:1885656-1891462	opa RNAi_14D	control_14D	OK	1.25314	4.7626	1.92621	2.08145	0.00065	0.00960907
wnd	wnd	wnd	chr3L:19624405-19635783	opa RNAi_14D	control_14D	OK	0.738833	0.143193	-2.36729	-2.17991	0.00065	0.00960907
bc10	bc10	bc10	chr3L:5565230-5566765	opa RNAi_14D	control_14D	OK	273.658	141.675	-0.949787	-2.01838	0.0007	0.010066
CG14478	CG14478	CG14478	chr2R:17457662-17465795	opa RNAi_14D	control_14D	OK	159.637	82.3504	-0.954946	-2.12318	0.0007	0.010066
CG31262	CG31262	CG31262	chr3R:17217115-17223074	opa RNAi_14D	control_14D	OK	0.38016	1.59596	2.06974	2.1084	0.0007	0.010066
CG31360	CG31360	CG31360	chr3R:17685096-17687071	opa RNAi_14D	control_14D	OK	55.5175	13.4056	-2.05011	-2.22372	0.0007	0.010066
CG6171	CG6171	CG6171	chr3R:15361691-15367665	opa RNAi_14D	control_14D	OK	156.907	55.2302	-1.50638	-1.99311	0.0007	0.010066
CG6617	CG6617	CG6617	chrX:18648181-18650444	opa RNAi_14D	control_14D	OK	686.557	304.781	-1.17161	-2.05057	0.0007	0.010066
CG9987	CG9987	CG9987	chr2L:19430642-19432444	opa RNAi_14D	control_14D	OK	0.525458	2.12965	2.01897	1.97492	0.0007	0.010066
CR44519	CR44519	CR44519	chr3L:5501101-5501469	opa RNAi_14D	control_14D	OK	0	0.703656	inf	#NAME?	0.0007	0.010066
Hem	Hem	Hem	chr3L:22284353-22288195	opa RNAi_14D	control_14D	OK	1.61954	5.18573	1.67896	2.20402	0.0007	0.010066
lark	lark	lark	chr3L:7335441-7345183	opa RNAi_14D	control_14D	OK	19.1482	49.2214	1.36208	2.17739	0.0007	0.010066
MFS15	MFS15	MFS15	chr2R:18794617-18796678	opa RNAi_14D	control_14D	OK	2.10061	6.46922	1.62278	2.08503	0.0007	0.010066
Reph	Reph	Reph	chr2L:3803544-3810671	opa RNAi_14D	control_14D	OK	1.88545	5.36282	1.50808	1.92471	0.0007	0.010066
Sod2	Sod2	Sod2	chr2R:16772784-16773915	opa RNAi_14D	control_14D	OK	432.885	233.004	-0.89363	-1.91634	0.0007	0.010066
TfIIA-S-2	TfIIA-S-2	TfIIA-S-2	chrX:1011100-1011643	opa RNAi_14D	control_14D	OK	23.1009	0.502377	-5.52303	-3.95449	0.0007	0.010066
Tsp66E	Tsp66E	Tsp66E	chr3L:8905917-8932065	opa RNAi_14D	control_14D	OK	5.32258	1.55973	-1.77083	-2.02526	0.0007	0.010066
atms	atms	atms	chr3R:4750034-4777490	opa RNAi_14D	control_14D	OK	15.0095	35.0387	1.22307	1.94938	0.00075	0.0105547
CG16957	CG16957	CG16957	chr2L:13395359-13396184	opa RNAi_14D	control_14D	OK	0.941928	6.46333	2.77859	2.42492	0.00075	0.0105547
CG17737	CG17737	CG17737	chr3L:3223340-3224650	opa RNAi_14D	control_14D	OK	2753.08	1602.85	-0.780409	-1.84614	0.00075	0.0105547
CG32708	CG32708	CG32708	chrX:9085931-9086864	opa RNAi_14D	control_14D	OK	386.264	203.383	-0.925389	-1.92024	0.00075	0.0105547
CG4133	CG4133	CG4133	chr2L:455530-458745	opa RNAi_14D	control_14D	OK	0.142591	0.656013	2.20184	1.82628	0.00075	0.0105547
CG5281	CG5281	CG5281	chr3R:11435849-11437523	opa RNAi_14D	control_14D	OK	2.30577	7.56495	1.71408	2.02334	0.00075	0.0105547
CG7656	CG7656	CG7656	chr3L:15585430-15588175	opa RNAi_14D	control_14D	OK	23.0529	55.6324	1.27098	2.14031	0.00075	0.0105547
CG9391	CG9391	CG9391	chr3L:21266679-21268335	opa RNAi_14D	control_14D	OK	26.1173	9.31981	-1.48663	-2.05677	0.00075	0.0105547
CR44126	CR44126	CR44126	chr2R:5937399-5938994	opa RNAi_14D	control_14D	OK	5.67893	19.8193	1.80321	2.17911	0.00075	0.0105547
Cul1	Cul1	Cul1	chr2R:7916855-7922604	opa RNAi_14D	control_14D	OK	72.3721	145.367	1.00619	2.0447	0.00075	0.0105547
Mkrn1	Mkrn1	Mkrn1	chr3L:21529958-21533713	opa RNAi_14D	control_14D	OK	714.245	405.374	-0.817164	-1.94186	0.00075	0.0105547
PH4alphaEFB	PH4alphaEFB	PH4alphaEFB	chr3R:30466049-30485799	opa RNAi_14D	control_14D	OK	0.289655	2.16345	2.90093	2.68553	0.00075	0.0105547
CG32344	CG32344	CG32344	chr3L:321232-324720	opa RNAi_14D	control_14D	OK	17.5908	36.445	1.0509	1.88459	0.0008	0.0111788
Pdsw	Pdsw	Pdsw	chr2L:3466156-3467334	opa RNAi_14D	control_14D	OK	2108.56	1170.71	-0.848867	-1.96067	0.0008	0.0111788
U2af38	U2af38	U2af38	chr2L:292418-294681	opa RNAi_14D	control_14D	OK	83.6143	186.617	1.15826	1.92436	0.0008	0.0111788
xit	xit	xit	chrX:6821015-6822840	opa RNAi_14D	control_14D	OK	0.750476	4.32103	2.5255	2.48415	0.0008	0.0111788
CG14657	CG14657	CG14657	chr3R:4817979-4821432	opa RNAi_14D	control_14D	OK	10.5061	24.5	1.22155	2.04101	0.00085	0.0116713
CG31373	CG31373	CG31373	chr3R:10708486-10709364	opa RNAi_14D	control_14D	OK	19.6222	5.79426	-1.75979	-2.12592	0.00085	0.0116713
dnt	dnt	dnt	chr2L:19338668-19363227	opa RNAi_14D	control_14D	OK	12.1437	28.3756	1.22445	2.04196	0.00085	0.0116713
Hexim	Hexim	Hexim	chr3R:14659437-14663197	opa RNAi_14D	control_14D	OK	62.2587	7.87871	-2.98225	-2.49633	0.00085	0.0116713
IntS6	IntS6	IntS6	chrX:5738662-5747254	opa RNAi_14D	control_14D	OK	3.02213	1.11511	-1.43839	-1.95376	0.00085	0.0116713
Maf1	Maf1	Maf1	chr2R:1512809-1527095	opa RNAi_14D	control_14D	OK	1031.48	560.854	-0.879015	-2.00677	0.00085	0.0116713
mRpL23	mRpL23	mRpL23	chr3L:2372198-2373704	opa RNAi_14D	control_14D	OK	625.668	312.645	-1.00087	-1.93365	0.00085	0.0116713
primo-1	primo-1	primo-1	chr3R:13710016-13711835	opa RNAi_14D	control_14D	OK	1109.65	600.606	-0.885612	-1.94431	0.00085	0.0116713
SH3PX1	SH3PX1	SH3PX1	chr3L:9710421-9713827	opa RNAi_14D	control_14D	OK	1.19869	4.38195	1.87012	2.16881	0.00085	0.0116713
Snap24	Snap24	Snap24	chr3R:9761304-9763150	opa RNAi_14D	control_14D	OK	4.65471	1.52253	-1.61223	-1.98117	0.00085	0.0116713
CG13142	CG13142	CG13142	chr2L:10439439-10441047	opa RNAi_14D	control_14D	OK	175.583	89.8565	-0.966455	-1.86887	0.0009	0.0122726
CR44764	CR44764	CR44764	chr2R:22690494-22691895	opa RNAi_14D	control_14D	OK	4.2609	11.8002	1.46958	1.95229	0.0009	0.0122726
Rala	Rala	Rala	chrX:3704609-3719635	opa RNAi_14D	control_14D	OK	20.6428	8.15992	-1.33901	-2.01824	0.0009	0.0122726
Sar1	Sar1	Sar1	chr3R:22356684-22360711	opa RNAi_14D	control_14D	OK	118.285	58.832	-1.00759	-1.96039	0.0009	0.0122726
CG31809	CG31809	CG31809	chr2L:16853619-16858714	opa RNAi_14D	control_14D	OK	0.179038	2.67504	3.90122	2.82584	0.00095	0.0127781
CG6180	CG6180	CG6180	chr2L:12706798-12708680	opa RNAi_14D	control_14D	OK	6.6229	76.0257	3.52095	2.35899	0.00095	0.0127781
CG6321	CG6321	CG6321	chr3L:11054034-11061224	opa RNAi_14D	control_14D	OK	178.879	92.9499	-0.944456	-1.95422	0.00095	0.0127781
CR43704	CR43704	CR43704	chr2L:3769925-3770454	opa RNAi_14D	control_14D	OK	4.61594	17.64	1.93416	2.11287	0.00095	0.0127781
l(2)37Cb	l(2)37Cb	l(2)37Cb	chr2L:19123997-19126976	opa RNAi_14D	control_14D	OK	0.851503	2.93104	1.78333	2.00231	0.00095	0.0127781
mRpS18A	mRpS18A	mRpS18A	chr3R:8561916-8562593	opa RNAi_14D	control_14D	OK	821.738	435.113	-0.91729	-1.96173	0.00095	0.0127781
Roe1	Roe1	Roe1	chr2R:13554076-13555606	opa RNAi_14D	control_14D	OK	127.289	59.875	-1.08808	-2.00855	0.00095	0.0127781
ZnT41F	ZnT41F	ZnT41F	chr2R:5774775-5782858	opa RNAi_14D	control_14D	OK	0.49252	0.0537829	-3.19496	-1.59259	0.00095	0.0127781
CG4511	CG4511	CG4511	chr3R:10854500-10856412	opa RNAi_14D	control_14D	OK	96.642	48.6347	-0.990664	-1.88081	0.001	0.0132701
CG6498	CG6498	CG6498	chr3L:15566012-15576313	opa RNAi_14D	control_14D	OK	1.02941	0.344987	-1.57721	-1.98466	0.001	0.0132701
CG7772	CG7772	CG7772	chrX:17906030-17907261	opa RNAi_14D	control_14D	OK	19.5073	6.73301	-1.53469	-1.99318	0.001	0.0132701
Cpr	Cpr	Cpr	chr2L:6338835-6346280	opa RNAi_14D	control_14D	OK	17.0664	6.91622	-1.3031	-1.9943	0.001	0.0132701
EF2	EF2	EF2	chr2L:21677912-21682164	opa RNAi_14D	control_14D	OK	296.481	522.248	0.816794	1.92323	0.001	0.0132701
fd19B	fd19B	fd19B	chrX:20091427-20092408	opa RNAi_14D	control_14D	OK	5.26708	0.320229	-4.03983	-2.99677	0.001	0.0132701
Hex-A	Hex-A	Hex-A	chrX:9585674-9589813	opa RNAi_14D	control_14D	OK	4.43417	1.24678	-1.83045	-1.99932	0.001	0.0132701
Lrr47	Lrr47	Lrr47	chr2L:10517334-10519269	opa RNAi_14D	control_14D	OK	3.31611	10.3236	1.63838	2.11247	0.001	0.0132701
CanA-14F	CanA-14F	CanA-14F	chrX:16560683-16587172	opa RNAi_14D	control_14D	OK	0.0687863	0.698044	3.34313	2.24343	0.00105	0.0137948
CG10600	CG10600	CG10600	chr2L:18833709-18841310	opa RNAi_14D	control_14D	OK	2.08508	5.30714	1.34783	1.96243	0.00105	0.0137948
CG15706	CG15706	CG15706	chr2R:16223217-16234087	opa RNAi_14D	control_14D	OK	0.811003	3.0607	1.91608	2.0755	0.00105	0.0137948
CG32163	CG32163	CG32163	chr3L:16587156-16588143	opa RNAi_14D	control_14D	OK	193.731	97.4009	-0.992047	-1.84733	0.00105	0.0137948
CG4996	CG4996	CG4996	chr2R:17739900-17743969	opa RNAi_14D	control_14D	OK	1.11524	3.37109	1.59586	2.0437	0.00105	0.0137948
mRpL10	mRpL10	mRpL10	chr2L:203778-210725	opa RNAi_14D	control_14D	OK	236.515	116.606	-1.02028	-1.88842	0.00105	0.0137948
Arc1	Arc1	Arc1	chr2R:14357926-14360297	opa RNAi_14D	control_14D	OK	1.833	0.156839	-3.54686	-2.88506	0.0011	0.014309
CG10877	CG10877	CG10877	chr3R:20560864-20573000	opa RNAi_14D	control_14D	OK	3.26349	17.131	2.39212	2.48793	0.0011	0.014309
CG12171	CG12171	CG12171	chr3R:5633626-5635624	opa RNAi_14D	control_14D	OK	63.5274	28.5408	-1.15435	-1.84948	0.0011	0.014309
CG5003	CG5003	CG5003	chr3R:27912446-27916516	opa RNAi_14D	control_14D	OK	10.8501	25.3025	1.22157	1.9267	0.0011	0.014309
l(3)j2D3	l(3)j2D3	l(3)j2D3	chr3L:12116100-12118055	opa RNAi_14D	control_14D	OK	82.9458	41.3544	-1.00413	-1.85386	0.0011	0.014309
Oseg6	Oseg6	Oseg6	chr2R:19487045-19491846	opa RNAi_14D	control_14D	OK	7.9519	3.25869	-1.28701	-1.934	0.0011	0.014309
CG30046	CG30046	CG30046	chr2R:12314116-12317573	opa RNAi_14D	control_14D	OK	0.553045	0.0737556	-2.90657	-2.28648	0.00115	0.0147412
CG32068	CG32068	CG32068	chr3L:10663375-10664435	opa RNAi_14D	control_14D	OK	262.495	134.3	-0.966836	-1.86614	0.00115	0.0147412
CG4975	CG4975	CG4975	chr2R:17726913-17732987	opa RNAi_14D	control_14D	OK	54.387	25.4345	-1.09648	-1.888	0.00115	0.0147412
CG8654	CG8654	CG8654	chr2R:19979241-19984895	opa RNAi_14D	control_14D	OK	6.59029	16.6542	1.33747	2.01093	0.00115	0.0147412
Dis3	Dis3	Dis3	chr3R:24333432-24340645	opa RNAi_14D	control_14D	OK	6.86139	16.4267	1.25947	2.02217	0.00115	0.0147412
mRpL35	mRpL35	mRpL35	chr3R:22023526-22025506	opa RNAi_14D	control_14D	OK	516.16	277.891	-0.893297	-1.80873	0.00115	0.0147412
RpS5b	RpS5b	RpS5b	chr3R:14900431-14901563	opa RNAi_14D	control_14D	OK	160.844	312.171	0.956677	1.92657	0.00115	0.0147412
SMC2	SMC2	SMC2	chr2R:14848620-14852653	opa RNAi_14D	control_14D	OK	29.5181	57.5646	0.963581	1.9351	0.00115	0.0147412
sofe	sofe	sofe	chrX:10854999-10857413	opa RNAi_14D	control_14D	OK	1.97365	5.83022	1.56269	1.94762	0.00115	0.0147412
CG12896	CG12896	CG12896	chr2R:10426879-10427915	opa RNAi_14D	control_14D	OK	9.50223	2.39577	-1.98778	-2.12	0.0012	0.0151853
CG32364	CG32364	CG32364	chr3L:8209576-8210743	opa RNAi_14D	control_14D	OK	4.53346	0.395371	-3.51934	-2.77617	0.0012	0.0151853
CG6674	CG6674	CG6674	chr3L:9971150-9972054	opa RNAi_14D	control_14D	OK	119.78	55.827	-1.10135	-1.91817	0.0012	0.0151853
Cnb	Cnb	Cnb	chr3L:1947564-1950262	opa RNAi_14D	control_14D	OK	3.35229	9.09566	1.44003	1.91307	0.0012	0.0151853
CR45082	CR45082	CR45082	chrX:21496525-21520017	opa RNAi_14D	control_14D	OK	8.69003	1.89229	-2.19922	-2.12704	0.0012	0.0151853
Non1	Non1	Non1	chr2R:9396264-9398734	opa RNAi_14D	control_14D	OK	35.9753	74.2331	1.04506	1.97661	0.0012	0.0151853
Nup133	Nup133	Nup133	chr3R:22690606-22694772	opa RNAi_14D	control_14D	OK	4.00631	9.72896	1.28001	1.89713	0.0012	0.0151853
Spn	Spn	Spn	chr3L:2505244-2554292	opa RNAi_14D	control_14D	OK	3.81891	1.43349	-1.41362	-1.91343	0.0012	0.0151853
CG10445	CG10445	CG10445	chr3R:7916598-7920299	opa RNAi_14D	control_14D	OK	0.91347	2.71731	1.57275	1.89751	0.00125	0.0155935
CG7637	CG7637	CG7637	chr2R:10809396-10810936	opa RNAi_14D	control_14D	OK	1760.52	790.528	-1.15511	-1.95343	0.00125	0.0155935
EndoB	EndoB	EndoB	chr2R:19307446-19310665	opa RNAi_14D	control_14D	OK	109.088	56.5924	-0.946808	-1.92119	0.00125	0.0155935
net	net	net	chr2L:82420-87387	opa RNAi_14D	control_14D	OK	28.6148	57.8828	1.01637	1.84624	0.00125	0.0155935
pit	pit	pit	chr3R:22034297-22038925	opa RNAi_14D	control_14D	OK	40.1465	97.8399	1.28515	2.15332	0.00125	0.0155935
Rpi	Rpi	Rpi	chr2R:23354366-23357565	opa RNAi_14D	control_14D	OK	46.2991	11.2105	-2.04614	-2.31547	0.00125	0.0155935
Src42A	Src42A	Src42A	chr2R:5981843-6012795	opa RNAi_14D	control_14D	OK	18.0882	36.8185	1.02539	1.87855	0.00125	0.0155935
stc	stc	stc	chr2L:15113479-15118069	opa RNAi_14D	control_14D	OK	3.91986	1.52823	-1.35894	-1.82039	0.00125	0.0155935
trn	trn	trn	chr3L:13114270-13118077	opa RNAi_14D	control_14D	OK	7.00036	17.3535	1.30972	1.93625	0.00125	0.0155935
CG17129	CG17129	CG17129	chr3L:677878-680326	opa RNAi_14D	control_14D	OK	27.0285	11.9624	-1.17598	-1.85008	0.0013	0.0161155
CG7900	CG7900	CG7900	chr3R:8094123-8105083	opa RNAi_14D	control_14D	OK	0.216113	1.22389	2.50161	2.07905	0.0013	0.0161155
CG9578	CG9578	CG9578	chrX:20170221-20173514	opa RNAi_14D	control_14D	OK	25.4869	9.02581	-1.49763	-1.99148	0.0013	0.0161155
mRpS5	mRpS5	mRpS5	chr3L:24537235-24543534	opa RNAi_14D	control_14D	OK	954.232	421.073	-1.18027	-1.75931	0.0013	0.0161155
CG32039	CG32039	CG32039	chr3L:9358998-9359996	opa RNAi_14D	control_14D	OK	168.989	78.639	-1.10361	-1.9204	0.00135	0.0166052
CG4901	CG4901	CG4901	chr2L:10211169-10213721	opa RNAi_14D	control_14D	OK	0.804508	2.68316	1.73775	2.00544	0.00135	0.0166052
CG5953	CG5953	CG5953	chr2L:16508077-16532877	opa RNAi_14D	control_14D	OK	0.763907	0.161617	-2.24082	-1.89129	0.00135	0.0166052
insc	insc	insc	chr2R:20821261-20836028	opa RNAi_14D	control_14D	OK	16.8197	5.632	-1.57843	-2.07346	0.00135	0.0166052
Poc1	Poc1	Poc1	chr3L:13388298-13390006	opa RNAi_14D	control_14D	OK	7.77978	18.8763	1.27878	1.89281	0.00135	0.0166052
B52	B52	B52	chr3R:13661310-13666891	opa RNAi_14D	control_14D	OK	84.1348	158.429	0.913061	1.86066	0.0014	0.0170348
CG12343	CG12343	CG12343	chr2R:10822399-10823372	opa RNAi_14D	control_14D	OK	1882.94	1092.06	-0.785934	-1.8482	0.0014	0.0170348
CG8892	CG8892	CG8892	chr2L:4979512-4981592	opa RNAi_14D	control_14D	OK	2.25772	6.57891	1.54298	1.91652	0.0014	0.0170348
gkt	gkt	gkt	chr2L:3159949-3162399	opa RNAi_14D	control_14D	OK	1.69126	4.71007	1.47765	1.83058	0.0014	0.0170348
Inx3	Inx3	Inx3	chr3R:28845269-28870439	opa RNAi_14D	control_14D	OK	138.09	254.315	0.881013	1.86489	0.0014	0.0170348
nesd	nesd	nesd	chr2L:20093971-20096253	opa RNAi_14D	control_14D	OK	5.06143	12.489	1.30305	1.84952	0.0014	0.0170348
Tango4	Tango4	Tango4	chrX:12021067-12022746	opa RNAi_14D	control_14D	OK	4.9276	12.8663	1.38464	1.87965	0.0014	0.0170348
Acph-1	Acph-1	Acph-1	chr3R:29991143-29993411	opa RNAi_14D	control_14D	OK	22.1803	9.28883	-1.25571	-1.80164	0.00145	0.0174552
CG11107	CG11107	CG11107	chr2R:7387186-7393161	opa RNAi_14D	control_14D	OK	14.1049	30.5546	1.11519	1.84102	0.00145	0.0174552
CR44386	CR44386	CR44386	chr2R:17140494-17141194	opa RNAi_14D	control_14D	OK	7.30511	1.5103	-2.27407	-2.03538	0.00145	0.0174552
mRpL28	mRpL28	mRpL28	chr2L:4973975-4977023	opa RNAi_14D	control_14D	OK	550.474	312.122	-0.818564	-1.81144	0.00145	0.0174552
Neb-cGP	Neb-cGP	Neb-cGP	chrX:10460735-10477201	opa RNAi_14D	control_14D	OK	3940.61	2263.93	-0.799591	-1.83881	0.00145	0.0174552
Psn	Psn	Psn	chr3L:20432467-20436209	opa RNAi_14D	control_14D	OK	24.8179	61.7867	1.31592	2.02221	0.00145	0.0174552
Trf4-1	Trf4-1	Trf4-1	chrX:8560321-8570159	opa RNAi_14D	control_14D	OK	8.40403	3.11907	-1.42997	-1.98785	0.00145	0.0174552
CG11781	CG11781	CG11781	chr3R:25023255-25025017	opa RNAi_14D	control_14D	OK	2863.09	1671.29	-0.776609	-1.78057	0.0015	0.0178937
CG17162	CG17162	CG17162	chrX:23084671-23096735	opa RNAi_14D	control_14D	OK	23.5236	10.1291	-1.2156	-1.96791	0.0015	0.0178937
CG42232	CG42232	CG42232	chr3R:16458279-16469663	opa RNAi_14D	control_14D	OK	2.03285	4.56729	1.16784	1.86957	0.0015	0.0178937
ox	ox	ox	chr2R:12756433-12757529	opa RNAi_14D	control_14D	OK	2254.21	876.711	-1.36245	-2.1003	0.0015	0.0178937
PHGPx	PHGPx	PHGPx	chr3L:3319554-3328871	opa RNAi_14D	control_14D	OK	320.748	145.104	-1.14436	-1.99438	0.0015	0.0178937
Sec61gamma	Sec61gamma	Sec61gamma	chrX:19643326-19644518	opa RNAi_14D	control_14D	OK	939.918	516.743	-0.863088	-1.83893	0.0015	0.0178937
Cat	Cat	Cat	chr3L:18822603-18828188	opa RNAi_14D	control_14D	OK	4.69974	12.0162	1.35433	1.90478	0.00155	0.0182969
CG11306	CG11306	CG11306	chr3L:21625805-21634446	opa RNAi_14D	control_14D	OK	25.4576	59.202	1.21755	1.96369	0.00155	0.0182969
CG17691	CG17691	CG17691	chr2R:1590483-1596457	opa RNAi_14D	control_14D	OK	1125.83	646.81	-0.799574	-1.87597	0.00155	0.0182969
CG3085	CG3085	CG3085	chr2R:23074822-23079038	opa RNAi_14D	control_14D	OK	14.7387	5.00713	-1.55756	-1.95441	0.00155	0.0182969
CG6115	CG6115	CG6115	chr2L:16887108-16887966	opa RNAi_14D	control_14D	OK	53.9239	23.5961	-1.19238	-1.82602	0.00155	0.0182969
CG7048	CG7048	CG7048	chr3R:22487038-22488955	opa RNAi_14D	control_14D	OK	2808.03	1647.73	-0.769081	-1.78374	0.00155	0.0182969
Cyp6d4	Cyp6d4	Cyp6d4	chr3R:22698318-22700307	opa RNAi_14D	control_14D	OK	3.73015	1.09625	-1.76666	-1.90349	0.00155	0.0182969
apt	apt	apt	chr2R:23564890-23600787	opa RNAi_14D	control_14D	OK	41.679	19.5256	-1.09396	-1.82402	0.0016	0.0185821
CG10495	CG10495	CG10495	chr2L:19063294-19064726	opa RNAi_14D	control_14D	OK	3.52977	9.83954	1.47902	1.91024	0.0016	0.0185821
CG12929	CG12929	CG12929	chr2R:9584642-9586714	opa RNAi_14D	control_14D	OK	252.419	91.8469	-1.45852	-2.02127	0.0016	0.0185821
CG33993	CG33993	CG33993	chr3L:5933035-5950658	opa RNAi_14D	control_14D	OK	0.0542908	0.813234	3.90489	2.10853	0.0016	0.0185821
CG3679	CG3679	CG3679	chrX:16303869-16308687	opa RNAi_14D	control_14D	OK	22.6414	9.40561	-1.26737	-1.84867	0.0016	0.0185821
CG44194	CG44194	CG44194	chr3R:12995619-12997726	opa RNAi_14D	control_14D	OK	707.274	390.954	-0.855271	-1.81672	0.0016	0.0185821
CG8860	CG8860	CG8860	chr2R:12179013-12179902	opa RNAi_14D	control_14D	OK	7031.43	4097.98	-0.778904	-1.78638	0.0016	0.0185821
CG9376	CG9376	CG9376	chr3L:19612454-19618521	opa RNAi_14D	control_14D	OK	85.0396	30.6688	-1.47136	-2.08195	0.0016	0.0185821
Ef1alpha100E	Ef1alpha100E	Ef1alpha100E	chr3R:31738467-31743306	opa RNAi_14D	control_14D	OK	0.281982	1.12706	1.9989	1.93476	0.0016	0.0185821
Ephrin	Ephrin	Ephrin	chr4:571754-580122	opa RNAi_14D	control_14D	OK	155.828	86.3112	-0.852339	-1.8133	0.0016	0.0185821
pyd3	pyd3	pyd3	chr3R:7747912-7750079	opa RNAi_14D	control_14D	OK	3.83314	0.901487	-2.08815	-2.1094	0.0016	0.0185821
Ac3	Ac3	Ac3	chr2L:21632586-21647964	opa RNAi_14D	control_14D	OK	5.11289	1.44859	-1.81949	-1.81781	0.00165	0.0190231
CG7580	CG7580	CG7580	chr3L:17474760-17476124	opa RNAi_14D	control_14D	OK	7222.45	4209.32	-0.778902	-1.78281	0.00165	0.0190231
CG9044	CG9044	CG9044	chr2L:5949449-5955235	opa RNAi_14D	control_14D	OK	1.20921	3.3615	1.47504	1.88344	0.00165	0.0190231
Mkp3	Mkp3	Mkp3	chr3L:19066154-19086426	opa RNAi_14D	control_14D	OK	35.3512	67.8264	0.940091	1.82441	0.00165	0.0190231
N	N	N	chrX:3134869-3172221	opa RNAi_14D	control_14D	OK	59.5108	34.1181	-0.802616	-1.81348	0.00165	0.0190231
CG30159	CG30159	CG30159	chr2R:6992675-6997971	opa RNAi_14D	control_14D	OK	47.5104	21.7424	-1.12773	-1.84122	0.0017	0.0195142
CG34012	CG34012	CG34012	chr3L:11108819-11109505	opa RNAi_14D	control_14D	OK	6.42338	0.408025	-3.9766	-2.67264	0.0017	0.0195142
comt	comt	comt	chrX:13259020-13262488	opa RNAi_14D	control_14D	OK	0.664828	0.065756	-3.33779	-2.37564	0.0017	0.0195142
CG14210	CG14210	CG14210	chrX:19616195-19618537	opa RNAi_14D	control_14D	OK	619.287	303.551	-1.02867	-1.8371	0.00175	0.0199722
mbo	mbo	mbo	chr3R:12676486-12679052	opa RNAi_14D	control_14D	OK	42.446	82.0338	0.950591	1.86864	0.00175	0.0199722
modSP	modSP	modSP	chr3R:16652445-16655662	opa RNAi_14D	control_14D	OK	0.382627	1.7478	2.19153	2.11843	0.00175	0.0199722
Vps24	Vps24	Vps24	chr3R:4307907-4310947	opa RNAi_14D	control_14D	OK	132.1	66.5358	-0.989431	-1.84928	0.00175	0.0199722
CG14314	CG14314	CG14314	chr3R:18216141-18218014	opa RNAi_14D	control_14D	OK	2.06678	0.406615	-2.34565	-2.1975	0.0018	0.0204837
LSm3	LSm3	LSm3	chr3R:23995658-24031827	opa RNAi_14D	control_14D	OK	4734.58	2761.68	-0.77769	-1.79891	0.0018	0.0204837
CG31715	CG31715	CG31715	chr2L:10341615-10342523	opa RNAi_14D	control_14D	OK	916.954	512.893	-0.838193	-1.82299	0.00185	0.0209323
CG4089	CG4089	CG4089	chr3R:10815287-10817490	opa RNAi_14D	control_14D	OK	7.21843	2.65247	-1.44435	-1.81084	0.00185	0.0209323
CG9669	CG9669	CG9669	chr3L:16842293-16844991	opa RNAi_14D	control_14D	OK	1890.78	953.842	-0.987156	-1.88115	0.00185	0.0209323
Cyp6u1	Cyp6u1	Cyp6u1	chr2R:6971995-6975133	opa RNAi_14D	control_14D	OK	1.45286	4.55267	1.64782	1.93473	0.00185	0.0209323
Dysb	Dysb	Dysb	chr3L:18867770-18869219	opa RNAi_14D	control_14D	OK	4.28533	1.20414	-1.8314	-1.90636	0.0019	0.0214673
CG13364	CG13364	CG13364	chrX:623467-625203	opa RNAi_14D	control_14D	OK	6267.35	3582.97	-0.806702	-1.85462	0.00195	0.0217833
CG14435	CG14435	CG14435	chrX:6838173-6843921	opa RNAi_14D	control_14D	OK	1.0216	0.215932	-2.24217	-2.0448	0.00195	0.0217833
CG2260	CG2260	CG2260	chrX:8117011-8121147	opa RNAi_14D	control_14D	OK	52.3957	102.141	0.963044	1.85849	0.00195	0.0217833
CG40045	CG40045	CG40045	chr3L:24028514-24035859	opa RNAi_14D	control_14D	OK	997.347	584.283	-0.771428	-1.76007	0.00195	0.0217833
CG8316	CG8316	CG8316	chrX:17629790-17632047	opa RNAi_14D	control_14D	OK	8.58039	19.8388	1.20921	1.81924	0.00195	0.0217833
GstE14	GstE14	GstE14	chr2R:13239728-13241013	opa RNAi_14D	control_14D	OK	7.1548	17.7782	1.31313	1.74677	0.00195	0.0217833
lgs	lgs	lgs	chr4:436956-443911	opa RNAi_14D	control_14D	OK	40.504	21.7396	-0.897741	-1.80135	0.00195	0.0217833
mRpL33	mRpL33	mRpL33	chrX:4321763-4322231	opa RNAi_14D	control_14D	OK	627.331	330.068	-0.926464	-1.73	0.00195	0.0217833
Rassf	Rassf	Rassf	chr3R:23114013-23117931	opa RNAi_14D	control_14D	OK	6.54478	2.78737	-1.23144	-1.72067	0.002	0.0222475
Taf12L	Taf12L	Taf12L	chr2L:4694720-4722465	opa RNAi_14D	control_14D	OK	6.90431	1.36639	-2.33713	-2.13337	0.002	0.0222475
Uch	Uch	Uch	chr2L:2212737-2214211	opa RNAi_14D	control_14D	OK	23.0815	51.7791	1.16563	1.83283	0.002	0.0222475
CG14482	CG14482	CG14482	chr2R:17568731-17572784	opa RNAi_14D	control_14D	OK	615.379	305.98	-1.00804	-1.77126	0.00205	0.0226445
CG5969	CG5969	CG5969	chr3L:20473782-20477003	opa RNAi_14D	control_14D	OK	401.806	221.277	-0.860642	-1.7723	0.00205	0.0226445
Cnx99A	Cnx99A	Cnx99A	chr3R:29315253-29319644	opa RNAi_14D	control_14D	OK	19.0367	40.3207	1.08274	1.86051	0.00205	0.0226445
CR44524	CR44524	CR44524	chrX:10893188-10893676	opa RNAi_14D	control_14D	OK	0.524028	0	#NAME?	#NAME?	0.00205	0.0226445
heix	heix	heix	chr2L:16294182-16299858	opa RNAi_14D	control_14D	OK	3.97923	9.56052	1.2646	1.85763	0.00205	0.0226445
bl	bl	bl	chr2R:20587550-20606854	opa RNAi_14D	control_14D	OK	46.5053	89.5454	0.945226	1.7808	0.0021	0.0231
Cyp310a1	Cyp310a1	Cyp310a1	chr2L:18617255-18661776	opa RNAi_14D	control_14D	OK	49.4972	102.96	1.05667	1.8931	0.0021	0.0231
VhaAC39-1	VhaAC39-1	VhaAC39-1	chrX:3880747-3882967	opa RNAi_14D	control_14D	OK	158.916	87.3736	-0.862998	-1.73462	0.0021	0.0231
CG6412	CG6412	CG6412	chr2L:17499267-17501106	opa RNAi_14D	control_14D	OK	11.9667	26.0491	1.12221	1.74648	0.00215	0.0234543
l(2)k14710	l(2)k14710	l(2)k14710	chr2R:6209781-6214122	opa RNAi_14D	control_14D	OK	1.81336	4.53624	1.32284	1.7494	0.00215	0.0234543
Mcm2	Mcm2	Mcm2	chr3R:8264969-8267924	opa RNAi_14D	control_14D	OK	8.12593	18.1001	1.15539	1.81586	0.00215	0.0234543
mRpL36	mRpL36	mRpL36	chr3L:8124583-8125132	opa RNAi_14D	control_14D	OK	511.768	262.407	-0.963685	-1.88345	0.00215	0.0234543
polo	polo	polo	chr3L:20309653-20313466	opa RNAi_14D	control_14D	OK	90.7869	160.557	0.822534	1.76589	0.00215	0.0234543
SmE	SmE	SmE	chr2L:7883281-7887513	opa RNAi_14D	control_14D	OK	3018.66	1785.13	-0.757878	-1.77466	0.00215	0.0234543
CG2186	CG2186	CG2186	chrX:10857654-10866246	opa RNAi_14D	control_14D	OK	2.64106	1.02157	-1.37033	-1.81499	0.0022	0.0238027
Gadd34	Gadd34	Gadd34	chr2R:23975598-23977255	opa RNAi_14D	control_14D	OK	153.391	83.6996	-0.873923	-1.78251	0.0022	0.0238027
GstE7	GstE7	GstE7	chr2R:18406923-18407688	opa RNAi_14D	control_14D	OK	111.022	53.0685	-1.06492	-1.82039	0.0022	0.0238027
HP5	HP5	HP5	chrX:11454785-11459227	opa RNAi_14D	control_14D	OK	32.2713	63.6642	0.980232	1.79523	0.0022	0.0238027
mRpL48	mRpL48	mRpL48	chr2L:1710461-1715851	opa RNAi_14D	control_14D	OK	295.439	150.138	-0.976576	-1.80211	0.0022	0.0238027
pdm2	pdm2	pdm2	chr2L:12657164-12686306	opa RNAi_14D	control_14D	OK	2.24455	6.69352	1.57634	1.9053	0.0022	0.0238027
bora	bora	bora	chr3L:18622691-18624751	opa RNAi_14D	control_14D	OK	15.6176	33.4038	1.09684	1.81776	0.00225	0.0242112
CG3609	CG3609	CG3609	chr2L:2372454-2374627	opa RNAi_14D	control_14D	OK	290.633	162.862	-0.835553	-1.80148	0.00225	0.0242112
roX1	roX1	roX1	chrX:3811697-3862697	opa RNAi_14D	control_14D	OK	236.575	138.135	-0.776214	-1.76107	0.00225	0.0242112
Snx6	Snx6	Snx6	chr2L:8218070-8220741	opa RNAi_14D	control_14D	OK	96.6275	52.0501	-0.892533	-1.71899	0.00225	0.0242112
CG32441	CG32441	CG32441	chr3L:21574130-21575874	opa RNAi_14D	control_14D	OK	547.63	315.311	-0.796428	-1.74092	0.0023	0.0246153
CG43085	CG43085	CG43085	chr3L:17645485-17646737	opa RNAi_14D	control_14D	OK	213.32	113.48	-0.910582	-1.7497	0.0023	0.0246153
CG8378	CG8378	CG8378	chr2R:12140630-12144552	opa RNAi_14D	control_14D	OK	15.2973	32.638	1.09328	1.80383	0.0023	0.0246153
shi	shi	shi	chrX:15892115-15906716	opa RNAi_14D	control_14D	OK	27.2844	53.7622	0.978517	1.85661	0.0023	0.0246153
ATPsyn-d	ATPsyn-d	ATPsyn-d	chr3R:19094999-19096271	opa RNAi_14D	control_14D	OK	5794.52	3465.83	-0.74149	-1.74035	0.00235	0.0248811
CG5516	CG5516	CG5516	chr3R:15963883-15965351	opa RNAi_14D	control_14D	OK	451.137	232.581	-0.955829	-1.78235	0.00235	0.0248811
CG7911	CG7911	CG7911	chr3R:30003680-30010352	opa RNAi_14D	control_14D	OK	3161.63	1473.83	-1.10109	-1.82135	0.00235	0.0248811
l(3)72Dn	l(3)72Dn	l(3)72Dn	chr3L:16226125-16228737	opa RNAi_14D	control_14D	OK	4.93686	11.313	1.19632	1.7315	0.00235	0.0248811
lsn	lsn	lsn	chr3R:21865167-21867919	opa RNAi_14D	control_14D	OK	237.864	129.465	-0.87758	-1.72517	0.00235	0.0248811
mats	mats	mats	chr3R:22421160-22423302	opa RNAi_14D	control_14D	OK	36.583	17.3456	-1.07661	-1.71029	0.00235	0.0248811
Rpb10	Rpb10	Rpb10	chr3R:24717510-24719364	opa RNAi_14D	control_14D	OK	1940.71	1068.24	-0.86135	-1.77887	0.00235	0.0248811
TMS1	TMS1	TMS1	chr3L:16412721-16417177	opa RNAi_14D	control_14D	OK	46.2643	97.3225	1.07287	1.84868	0.00235	0.0248811
CG6683	CG6683	CG6683	chr3L:8510002-8518738	opa RNAi_14D	control_14D	OK	77.8956	36.6716	-1.08688	-1.79112	0.0024	0.0252415
CG9630	CG9630	CG9630	chr3R:8267942-8269896	opa RNAi_14D	control_14D	OK	1.79315	5.39769	1.58985	1.87058	0.0024	0.0252415
Cyp312a1	Cyp312a1	Cyp312a1	chr3L:18128939-18132689	opa RNAi_14D	control_14D	OK	7.65281	2.74381	-1.47981	-1.81725	0.0024	0.0252415
lqf	lqf	lqf	chr3L:7528779-7540012	opa RNAi_14D	control_14D	OK	2.6338	6.51895	1.3075	1.81607	0.0024	0.0252415
Tsp42Ee	Tsp42Ee	Tsp42Ee	chr2R:7012253-7018362	opa RNAi_14D	control_14D	OK	603.155	358.384	-0.751024	-1.71377	0.0024	0.0252415
CG8187	CG8187	CG8187	chr2R:15538174-15541363	opa RNAi_14D	control_14D	OK	87.1711	41.0088	-1.08791	-1.76824	0.00245	0.025699
Rbm13	Rbm13	Rbm13	chrX:8901698-8903761	opa RNAi_14D	control_14D	OK	241.636	135.531	-0.834213	-1.75119	0.00245	0.025699
Aats-met	Aats-met	Aats-met	chr3R:14251382-14259991	opa RNAi_14D	control_14D	OK	3.7927	9.92211	1.38742	1.82354	0.0025	0.0260507
Pez	Pez	Pez	chr2L:6332880-6338671	opa RNAi_14D	control_14D	OK	2.24067	0.790218	-1.50361	-1.79191	0.0025	0.0260507
Rtf1	Rtf1	Rtf1	chr2R:22375089-22379007	opa RNAi_14D	control_14D	OK	5.12848	11.8994	1.21428	1.72573	0.0025	0.0260507
Tsp26A	Tsp26A	Tsp26A	chr2L:6000227-6006827	opa RNAi_14D	control_14D	OK	5.05479	2.03418	-1.3132	-1.69472	0.0025	0.0260507
unc-45	unc-45	unc-45	chr3R:8033300-8036652	opa RNAi_14D	control_14D	OK	0.0962961	0.805413	3.06418	2.40528	0.0025	0.0260507
CG13894	CG13894	CG13894	chr3L:693082-699144	opa RNAi_14D	control_14D	OK	2.39772	5.94939	1.31108	1.67283	0.00255	0.0265368
CG8369	CG8369	CG8369	chr3R:8822007-8822838	opa RNAi_14D	control_14D	OK	25.0295	8.45864	-1.56513	-1.75713	0.0026	0.0269507
Rab14	Rab14	Rab14	chr2L:14355144-14358764	opa RNAi_14D	control_14D	OK	271.857	152.041	-0.838383	-1.71454	0.0026	0.0269507
Rab8	Rab8	Rab8	chr3L:19867487-19871078	opa RNAi_14D	control_14D	OK	269.176	150.301	-0.840693	-1.74045	0.0026	0.0269507
CG7427	CG7427	CG7427	chr3L:15563426-15565559	opa RNAi_14D	control_14D	OK	256.314	143.181	-0.840075	-1.72759	0.00265	0.0270786
CG8677	CG8677	CG8677	chr2L:21221311-21232059	opa RNAi_14D	control_14D	OK	12.8548	23.2142	0.852696	1.73047	0.00265	0.0270786
CR44589	CR44589	CR44589	chr2L:12046441-12046679	opa RNAi_14D	control_14D	OK	0.472599	3.37696	2.83704	1.76314	0.00265	0.0270786
CR45276	CR45276	CR45276	chr2R:12206091-12207196	opa RNAi_14D	control_14D	OK	11.2325	25.6546	1.19153	1.70888	0.00265	0.0270786
DppIII	DppIII	DppIII	chr3R:8344399-8347465	opa RNAi_14D	control_14D	OK	1.25136	3.5879	1.51965	1.77042	0.00265	0.0270786
Fit2	Fit2	Fit2	chr3L:17024327-17027117	opa RNAi_14D	control_14D	OK	0.520754	1.88291	1.85429	1.96089	0.00265	0.0270786
GlyP	GlyP	GlyP	chr2L:2130812-2137296	opa RNAi_14D	control_14D	OK	0.855237	2.73791	1.67868	1.86987	0.00265	0.0270786
GstE11	GstE11	GstE11	chr2R:18503607-18505025	opa RNAi_14D	control_14D	OK	6.53128	2.25973	-1.53121	-1.82737	0.00265	0.0270786
mRpS11	mRpS11	mRpS11	chr3R:17072731-17073795	opa RNAi_14D	control_14D	OK	428.602	239.957	-0.83686	-1.72562	0.00265	0.0270786
mRpS23	mRpS23	mRpS23	chr2L:13833336-13835072	opa RNAi_14D	control_14D	OK	215.837	93.1329	-1.21258	-1.81548	0.00265	0.0270786
sra	sra	sra	chr3R:16186998-16197584	opa RNAi_14D	control_14D	OK	9.17877	3.03832	-1.59503	-1.808	0.00265	0.0270786
CG3224	CG3224	CG3224	chrX:6660551-6661462	opa RNAi_14D	control_14D	OK	183.81	95.0525	-0.951416	-1.7823	0.0027	0.0274125
CG6424	CG6424	CG6424	chr2R:17699096-17719346	opa RNAi_14D	control_14D	OK	14.3564	0.563703	-4.67061	-2.44185	0.0027	0.0274125
Dip3	Dip3	Dip3	chr2R:18128493-18130246	opa RNAi_14D	control_14D	OK	76.5642	39.2561	-0.963752	-1.75315	0.0027	0.0274125
rumi	rumi	rumi	chr3R:22747689-22750597	opa RNAi_14D	control_14D	OK	9.78601	3.49123	-1.48699	-1.83753	0.0027	0.0274125
Srp19	Srp19	Srp19	chr3L:7347309-7348034	opa RNAi_14D	control_14D	OK	301.61	159.887	-0.915631	-1.78124	0.0027	0.0274125
CG42259	CG42259	CG42259	chrX:1046223-1047009	opa RNAi_14D	control_14D	OK	529.595	276.418	-0.938038	-1.81881	0.00275	0.0277775
Chd3	Chd3	Chd3	chr3L:19447172-19450238	opa RNAi_14D	control_14D	OK	1.45846	3.88267	1.4126	1.79643	0.00275	0.0277775
ida	ida	ida	chr3L:3905343-3907813	opa RNAi_14D	control_14D	OK	0.184852	1.45696	2.97852	2.2978	0.00275	0.0277775
Su(var)3-3	Su(var)3-3	Su(var)3-3	chr3L:20226380-20230250	opa RNAi_14D	control_14D	OK	7.35152	3.14043	-1.22708	-1.73867	0.00275	0.0277775
CG14898	CG14898	CG14898	chr3R:16481166-16482452	opa RNAi_14D	control_14D	OK	213.242	105.207	-1.01926	-1.74558	0.0028	0.0281388
CG6005	CG6005	CG6005	chr3R:19022457-19024030	opa RNAi_14D	control_14D	OK	69.7088	35.2879	-0.982169	-1.75903	0.0028	0.0281388
Cyt-b5	Cyt-b5	Cyt-b5	chr2R:7533505-7539696	opa RNAi_14D	control_14D	OK	492.134	277.065	-0.828826	-1.74679	0.0028	0.0281388
SmF	SmF	SmF	chr2R:12182638-12185506	opa RNAi_14D	control_14D	OK	6285.97	3829.91	-0.714826	-1.69853	0.0028	0.0281388
CG32473	CG32473	CG32473	chr3R:13302647-13312785	opa RNAi_14D	control_14D	OK	3.9604	1.56355	-1.34083	-1.72471	0.00285	0.0284604
GstE5	GstE5	GstE5	chr2R:18404604-18405338	opa RNAi_14D	control_14D	OK	7.24567	2.41348	-1.58601	-1.72947	0.00285	0.0284604
msl-2	msl-2	msl-2	chr2L:3462217-3466112	opa RNAi_14D	control_14D	OK	2.62303	6.88222	1.39164	1.87045	0.00285	0.0284604
norpA	norpA	norpA	chrX:4322625-4365408	opa RNAi_14D	control_14D	OK	1.30305	0.490344	-1.41002	-1.72674	0.00285	0.0284604
S6k	S6k	S6k	chr3L:5797548-5810931	opa RNAi_14D	control_14D	OK	9.74542	20.1474	1.0478	1.7499	0.00285	0.0284604
Bsg25D	Bsg25D	Bsg25D	chr2L:5271727-5278548	opa RNAi_14D	control_14D	OK	197.92	111.376	-0.829478	-1.73444	0.0029	0.0288142
CG4911	CG4911	CG4911	chr3L:9067194-9072731	opa RNAi_14D	control_14D	OK	153.844	84.8843	-0.857894	-1.70469	0.0029	0.0288142
hbs	hbs	hbs	chr2R:15011395-15042134	opa RNAi_14D	control_14D	OK	0.0808223	0.476203	2.55875	1.87522	0.0029	0.0288142
mRpS7	mRpS7	mRpS7	chr2L:10386661-10387652	opa RNAi_14D	control_14D	OK	739.434	431.108	-0.778371	-1.71372	0.0029	0.0288142
CG6796	CG6796	CG6796	chr2R:17001993-17005149	opa RNAi_14D	control_14D	OK	34.5484	12.8463	-1.42727	-1.68986	0.00295	0.0292742
CG6145	CG6145	CG6145	chr2R:13537370-13547577	opa RNAi_14D	control_14D	OK	2.7822	7.3261	1.39682	1.83486	0.003	0.0295848
CG6712	CG6712	CG6712	chr2L:12091821-12096511	opa RNAi_14D	control_14D	OK	217.814	113.137	-0.945029	-1.747	0.003	0.0295848
Doc1	Doc1	Doc1	chr3L:9041374-9045042	opa RNAi_14D	control_14D	OK	13.5349	30.0572	1.15102	1.75481	0.003	0.0295848
rig	rig	rig	chr2R:20633875-20640681	opa RNAi_14D	control_14D	OK	5.04022	2.00211	-1.33197	-1.79528	0.003	0.0295848
tank	tank	tank	chr2L:4835334-4837999	opa RNAi_14D	control_14D	OK	1.48845	4.01364	1.4311	1.7792	0.003	0.0295848
Cen	Cen	Cen	chr2L:20676044-20681846	opa RNAi_14D	control_14D	OK	112.755	59.5338	-0.92141	-1.73034	0.00305	0.0297441
CG12082	CG12082	CG12082	chr3L:3145404-3148358	opa RNAi_14D	control_14D	OK	2.75275	0.920785	-1.57994	-1.83278	0.00305	0.0297441
CG13365	CG13365	CG13365	chrX:620281-621215	opa RNAi_14D	control_14D	OK	347.8	182.546	-0.929993	-1.72723	0.00305	0.0297441
CG13423	CG13423	CG13423	chr2R:20536577-20538264	opa RNAi_14D	control_14D	OK	2.87992	7.47402	1.37585	1.75416	0.00305	0.0297441
CR41602	CR41602	CR41602	chrX:23211191-23217217	opa RNAi_14D	control_14D	OK	206.29	336.978	0.707982	1.71549	0.00305	0.0297441
Pex6	Pex6	Pex6	chr2R:10879973-10883202	opa RNAi_14D	control_14D	OK	2.9658	6.72407	1.18091	1.67684	0.00305	0.0297441
rdgBbeta	rdgBbeta	rdgBbeta	chr2R:17695775-17698796	opa RNAi_14D	control_14D	OK	14.0522	5.68313	-1.30604	-1.69084	0.00305	0.0297441
Sirt2	Sirt2	Sirt2	chr3R:20328464-20330915	opa RNAi_14D	control_14D	OK	6.99728	2.43013	-1.52576	-1.76551	0.00305	0.0297441
sle	sle	sle	chr3R:10333114-10338265	opa RNAi_14D	control_14D	OK	0.600035	1.66356	1.47116	1.68602	0.00305	0.0297441
CG12010	CG12010	CG12010	chr3L:3374281-3376649	opa RNAi_14D	control_14D	OK	3.57475	8.51872	1.2528	1.74135	0.0031	0.0300464
CG14414	CG14414	CG14414	chrX:14580599-14582982	opa RNAi_14D	control_14D	OK	83.3298	33.228	-1.32643	-1.77172	0.0031	0.0300464
CG17816	CG17816	CG17816	chr3R:7855581-7886733	opa RNAi_14D	control_14D	OK	0.190399	0.688349	1.85412	1.41065	0.0031	0.0300464
dpa	dpa	dpa	chr2R:7496701-7500145	opa RNAi_14D	control_14D	OK	3.81499	8.86314	1.21614	1.72439	0.0031	0.0300464
east	east	east	chrX:2010859-2061915	opa RNAi_14D	control_14D	OK	18.6017	9.73236	-0.934574	-1.7233	0.0031	0.0300464
alphaTub84B	alphaTub84B	alphaTub84B	chr3R:7086598-7088839	opa RNAi_14D	control_14D	OK	247.099	415.328	0.749162	1.68843	0.00315	0.0303821
CG6066	CG6066	CG6066	chr3R:27115151-27116707	opa RNAi_14D	control_14D	OK	308.971	181.347	-0.768717	-1.67157	0.00315	0.0303821
fend	fend	fend	chrX:9121972-9135099	opa RNAi_14D	control_14D	OK	9.78067	4.62529	-1.08039	-1.67756	0.00315	0.0303821
Thor	Thor	Thor	chr2L:3478433-3479612	opa RNAi_14D	control_14D	OK	5.696	14.9521	1.39232	1.7028	0.00315	0.0303821
CG10089	CG10089	CG10089	chr3L:13465551-13474787	opa RNAi_14D	control_14D	OK	2.87494	0.764064	-1.91177	-1.82724	0.0032	0.0306402
CG1074	CG1074	CG1074	chr3R:4433964-4436175	opa RNAi_14D	control_14D	OK	52.9877	98.4761	0.894114	1.73934	0.0032	0.0306402
CG1550	CG1550	CG1550	chr2R:7810067-7812028	opa RNAi_14D	control_14D	OK	3.75166	8.70441	1.21422	1.65394	0.0032	0.0306402
MED15	MED15	MED15	chr2L:458875-476170	opa RNAi_14D	control_14D	OK	11.5663	24.0897	1.05849	1.71753	0.0032	0.0306402
Sema-2a	Sema-2a	Sema-2a	chr2R:16500177-16533459	opa RNAi_14D	control_14D	OK	19.5455	36.7568	0.911173	1.70258	0.0032	0.0306402
XRCC1	XRCC1	XRCC1	chrX:5329875-5332435	opa RNAi_14D	control_14D	OK	60.6403	31.6881	-0.936336	-1.73803	0.0032	0.0306402
CG14977	CG14977	CG14977	chr3L:3896899-3899156	opa RNAi_14D	control_14D	OK	1038.57	592.271	-0.810268	-1.69387	0.00325	0.0308945
CG1890	CG1890	CG1890	chr3R:31743489-31744248	opa RNAi_14D	control_14D	OK	12.6494	31.0865	1.29722	1.7197	0.00325	0.0308945
CG2852	CG2852	CG2852	chr2R:22644645-22646344	opa RNAi_14D	control_14D	OK	862.896	1417.74	0.716331	1.68687	0.00325	0.0308945
CG3262	CG3262	CG3262	chr2L:22239915-22246988	opa RNAi_14D	control_14D	OK	444.909	250.101	-0.830998	-1.75538	0.00325	0.0308945
CG34214	CG34214	CG34214	chr2R:24664397-24666022	opa RNAi_14D	control_14D	OK	1414.31	722.811	-0.968405	-1.76221	0.00325	0.0308945
CG6091	CG6091	CG6091	chr3L:11605435-11609465	opa RNAi_14D	control_14D	OK	4.69503	10.4347	1.15218	1.7318	0.00325	0.0308945
CG7191	CG7191	CG7191	chr2L:7767627-7775033	opa RNAi_14D	control_14D	OK	0.186703	1.12263	2.58806	1.98049	0.0033	0.0312946
sni	sni	sni	chrX:8241500-8248033	opa RNAi_14D	control_14D	OK	3.30677	11.948	1.85327	1.86458	0.0033	0.0312946
CG10157	CG10157	CG10157	chr3R:23678894-23679855	opa RNAi_14D	control_14D	OK	305.014	166.433	-0.873935	-1.70405	0.00335	0.0315418
CG11880	CG11880	CG11880	chr3R:29123369-29128247	opa RNAi_14D	control_14D	OK	1.68628	4.84718	1.5233	1.82153	0.00335	0.0315418
CG42362	CG42362	CG42362	chr2R:21664125-21666579	opa RNAi_14D	control_14D	OK	14.6099	4.24377	-1.78352	-1.86553	0.00335	0.0315418
CG43444	CG43444	CG43444	chr3L:2786206-2879158	opa RNAi_14D	control_14D	OK	2.33678	5.07837	1.11984	1.79499	0.00335	0.0315418
CheB38c	CheB38c	CheB38c	chr2L:20820088-20820867	opa RNAi_14D	control_14D	OK	5.24239	0.671087	-2.96565	-2.19319	0.00335	0.0315418
Tom7	Tom7	Tom7	chr2R:8951594-8952242	opa RNAi_14D	control_14D	OK	2159.9	1256.52	-0.781531	-1.68911	0.00335	0.0315418
CR40962	CR40962	CR40962	chrX:23278931-23279139	opa RNAi_14D	control_14D	OK	4.40958	21.1861	2.26441	1.87842	0.0034	0.0318609
l(3)72Dp	l(3)72Dp	l(3)72Dp	chr3L:16233126-16236999	opa RNAi_14D	control_14D	OK	3.34367	23.7737	2.82986	2.0022	0.0034	0.0318609
th	th	th	chr3L:16038409-16051034	opa RNAi_14D	control_14D	OK	3.08286	8.64152	1.48702	1.84174	0.0034	0.0318609
ths	ths	ths	chr2R:11756816-11814424	opa RNAi_14D	control_14D	OK	1.28042	4.13018	1.68959	1.71454	0.0034	0.0318609
CG8336	CG8336	CG8336	chr3L:9624236-9631795	opa RNAi_14D	control_14D	OK	147.269	64.1102	-1.19983	-1.8041	0.00345	0.032139
ImpL1	ImpL1	ImpL1	chr3L:13382764-13383999	opa RNAi_14D	control_14D	OK	2.32021	0.397661	-2.54465	-2.03434	0.00345	0.032139
LpR1	LpR1	LpR1	chr3R:25741347-25763105	opa RNAi_14D	control_14D	OK	0.699708	0.194933	-1.84377	-1.62366	0.00345	0.032139
tmod	tmod	tmod	chr3R:30532606-30578905	opa RNAi_14D	control_14D	OK	12.0281	40.4185	1.74861	2.09982	0.00345	0.032139
Ude	Ude	Ude	chr3R:24788053-24799668	opa RNAi_14D	control_14D	OK	3.90968	1.35667	-1.52698	-1.69662	0.00345	0.032139
nero	nero	nero	chr3R:31746444-31747558	opa RNAi_14D	control_14D	OK	87.2424	45.2836	-0.946042	-1.68811	0.0035	0.0325282
pon	pon	pon	chrX:4636317-4639112	opa RNAi_14D	control_14D	OK	0.068551	0.789112	3.52498	2.46361	0.0035	0.0325282
CG8032	CG8032	CG8032	chr3R:8664114-8667772	opa RNAi_14D	control_14D	OK	0.627574	1.86629	1.57231	1.71008	0.00355	0.0329155
Sld5	Sld5	Sld5	chr3R:26055656-26056547	opa RNAi_14D	control_14D	OK	225.009	122.935	-0.872088	-1.67645	0.00355	0.0329155
CG18789	CG18789	CG18789	chr2L:11992901-11995432	opa RNAi_14D	control_14D	OK	16.529	3.94355	-2.06743	-1.98013	0.0036	0.0332233
CG9849	CG9849	CG9849	chr2R:22937278-22941169	opa RNAi_14D	control_14D	OK	54.9223	24.9097	-1.14068	-1.75315	0.0036	0.0332233
p120ctn	p120ctn	p120ctn	chr2R:4595287-4609492	opa RNAi_14D	control_14D	OK	398.743	239.632	-0.734641	-1.71775	0.0036	0.0332233
Rcp	Rcp	Rcp	chrX:16884580-16886612	opa RNAi_14D	control_14D	OK	310.189	136.08	-1.18869	-1.72014	0.0036	0.0332233
CG33116	CG33116	CG33116	chr2L:19533478-19537363	opa RNAi_14D	control_14D	OK	7.20858	15.9512	1.14588	1.70442	0.00365	0.0334506
MFS16	MFS16	MFS16	chr2R:21282297-21290343	opa RNAi_14D	control_14D	OK	15.8074	33.9049	1.1009	1.6983	0.00365	0.0334506
Oatp74D	Oatp74D	Oatp74D	chr3L:17487117-17511693	opa RNAi_14D	control_14D	OK	0.492333	1.69129	1.78042	1.88719	0.00365	0.0334506
robl	robl	robl	chr2R:17456471-17457129	opa RNAi_14D	control_14D	OK	1473.35	880.292	-0.743046	-1.67369	0.00365	0.0334506
Sec10	Sec10	Sec10	chr3R:24134830-24137538	opa RNAi_14D	control_14D	OK	59.2062	31.171	-0.925544	-1.74406	0.00365	0.0334506
Tgt	Tgt	Tgt	chr2L:1184064-1185698	opa RNAi_14D	control_14D	OK	2.57264	7.96974	1.63129	1.8174	0.00365	0.0334506
CG11263	CG11263	CG11263	chr3L:13006816-13007881	opa RNAi_14D	control_14D	OK	167.84	91.8266	-0.870099	-1.69089	0.0037	0.0337135
mRpS10	mRpS10	mRpS10	chr3R:15229664-15230516	opa RNAi_14D	control_14D	OK	976.047	582.369	-0.745019	-1.68434	0.0037	0.0337135
r-l	r-l	r-l	chr3R:21065240-21073319	opa RNAi_14D	control_14D	OK	29.2681	72.068	1.30003	1.78034	0.0037	0.0337135
Sbp2	Sbp2	Sbp2	chr3L:8304156-8305325	opa RNAi_14D	control_14D	OK	186.393	100.755	-0.887497	-1.73454	0.0037	0.0337135
tun	tun	tun	chr2R:15762564-15855645	opa RNAi_14D	control_14D	OK	34.6978	67.7088	0.964499	1.7503	0.0037	0.0337135
Rop	Rop	Rop	chr3L:4136358-4138996	opa RNAi_14D	control_14D	OK	8.65135	17.8254	1.04293	1.65582	0.00375	0.0341297
CG12877	CG12877	CG12877	chr3R:27707099-27710857	opa RNAi_14D	control_14D	OK	15.7807	30.8923	0.96909	1.72438	0.0038	0.0344658
Pnn	Pnn	Pnn	chr3R:9740898-9742844	opa RNAi_14D	control_14D	OK	61.5807	30.9618	-0.991987	-1.68585	0.0038	0.0344658
RpL35	RpL35	RpL35	chrX:5672400-5673545	opa RNAi_14D	control_14D	OK	6162.49	3760.19	-0.712706	-1.66838	0.0038	0.0344658
CR44318	CR44318	CR44318	chr3R:8287168-8287698	opa RNAi_14D	control_14D	OK	5.02425	0.518951	-3.27524	-2.18248	0.00385	0.0347996
Ir25a	Ir25a	Ir25a	chr2L:4830845-4835300	opa RNAi_14D	control_14D	OK	0.497051	1.58863	1.67632	1.72393	0.00385	0.0347996
ltd	ltd	ltd	chr2R:9177863-9186342	opa RNAi_14D	control_14D	OK	11.1793	3.05386	-1.87213	-1.76786	0.00385	0.0347996
CG4848	CG4848	CG4848	chr3R:12213791-12219686	opa RNAi_14D	control_14D	OK	0.2798	1.16019	2.05189	1.87173	0.00395	0.0356221
nahoda	nahoda	nahoda	chr2R:22896173-22916719	opa RNAi_14D	control_14D	OK	0.115949	0.536386	2.20978	1.77154	0.00395	0.0356221
Arpc1	Arpc1	Arpc1	chr2L:13827940-13829741	opa RNAi_14D	control_14D	OK	8.45364	20.6087	1.28561	1.76851	0.004	0.0358685
beta'COP	beta'COP	beta'COP	chr2L:13378901-13382382	opa RNAi_14D	control_14D	OK	3.69321	8.71993	1.23944	1.68698	0.004	0.0358685
CG15514	CG15514	CG15514	chr3R:29860054-29861494	opa RNAi_14D	control_14D	OK	27.0568	12.4656	-1.11804	-1.67566	0.004	0.0358685
CG9135	CG9135	CG9135	chr2L:6050799-6053877	opa RNAi_14D	control_14D	OK	11.3685	23.2912	1.03475	1.66143	0.004	0.0358685
dgt4	dgt4	dgt4	chrX:4111155-4130016	opa RNAi_14D	control_14D	OK	197.765	69.1471	-1.51604	-1.87815	0.004	0.0358685
CG10217	CG10217	CG10217	chr3R:23760736-23763263	opa RNAi_14D	control_14D	OK	47.8324	85.7588	0.842298	1.66622	0.00405	0.0361529
CG3597	CG3597	CG3597	chr2L:2370151-2371524	opa RNAi_14D	control_14D	OK	2.10122	0.519616	-2.01571	-1.8445	0.00405	0.0361529
mbc	mbc	mbc	chr3R:23781764-23801634	opa RNAi_14D	control_14D	OK	1.49827	4.08176	1.4459	1.84444	0.00405	0.0361529
Vha14-1	Vha14-1	Vha14-1	chr2R:15679425-15680084	opa RNAi_14D	control_14D	OK	1000.58	602.861	-0.730943	-1.64961	0.00405	0.0361529
CG42535	CG42535	CG42535	chr3L:10629082-10630935	opa RNAi_14D	control_14D	OK	5.75866	1.64263	-1.80972	-1.82165	0.0041	0.0365168
TBPH	TBPH	TBPH	chr2R:23859066-23862593	opa RNAi_14D	control_14D	OK	27.5867	52.6444	0.932305	1.64168	0.0041	0.0365168
Rint1	Rint1	Rint1	chr3L:7323618-7326255	opa RNAi_14D	control_14D	OK	0.217347	0.895658	2.04295	1.78792	0.00415	0.0369205
CG11417	CG11417	CG11417	chrX:1354013-1356473	opa RNAi_14D	control_14D	OK	21.8393	10.7971	-1.01628	-1.66159	0.0042	0.037198
out	out	out	chrX:19310512-19322106	opa RNAi_14D	control_14D	OK	0.741026	0.191415	-1.95282	-1.65558	0.0042	0.037198
UbcD10	UbcD10	UbcD10	chr2R:17786134-17789410	opa RNAi_14D	control_14D	OK	319.997	184.896	-0.791345	-1.65209	0.0042	0.037198
yki	yki	yki	chr2R:24065974-24068485	opa RNAi_14D	control_14D	OK	5.5723	13.442	1.2704	1.69967	0.0042	0.037198
CG12279	CG12279	CG12279	chr3R:12705093-12712299	opa RNAi_14D	control_14D	OK	115.197	48.9203	-1.23559	-1.7098	0.00425	0.0375567
CR43461	CR43461	CR43461	chrX:6720003-6739986	opa RNAi_14D	control_14D	OK	6.93476	1.23683	-2.4872	-2.09986	0.00425	0.0375567
Su(var)3-9	Su(var)3-9	Su(var)3-9	chr3R:15257843-15263458	opa RNAi_14D	control_14D	OK	26.8365	60.3113	1.16824	1.69737	0.0043	0.0379561
CG4942	CG4942	CG4942	chr3L:9073104-9074467	opa RNAi_14D	control_14D	OK	24.5883	11.2565	-1.12721	-1.62569	0.00435	0.0381421
CG6259	CG6259	CG6259	chr3L:17620122-17621625	opa RNAi_14D	control_14D	OK	197.215	108.729	-0.859034	-1.67096	0.00435	0.0381421
CG9948	CG9948	CG9948	chr3L:6955990-6958108	opa RNAi_14D	control_14D	OK	288.266	145.588	-0.985509	-1.66276	0.00435	0.0381421
Lac	Lac	Lac	chr2R:12453189-12465630	opa RNAi_14D	control_14D	OK	47.6351	84.7235	0.830737	1.6387	0.00435	0.0381421
sog	sog	sog	chrX:15603282-15633434	opa RNAi_14D	control_14D	OK	133.49	79.5841	-0.746177	-1.66499	0.00435	0.0381421
Tfb4	Tfb4	Tfb4	chr2L:1147821-1150677	opa RNAi_14D	control_14D	OK	137.428	71.0009	-0.952763	-1.63928	0.00435	0.0381421
CIAPIN1	CIAPIN1	CIAPIN1	chr2L:15035393-15038861	opa RNAi_14D	control_14D	OK	130.85	77.6833	-0.752233	-1.59604	0.0044	0.0384526
CycT	CycT	CycT	chr3L:17551003-17557788	opa RNAi_14D	control_14D	OK	29.7174	51.0365	0.780223	1.61683	0.0044	0.0384526
mav	mav	mav	chr4:623218-626031	opa RNAi_14D	control_14D	OK	324.276	197.249	-0.717205	-1.66783	0.0044	0.0384526
CG3847	CG3847	CG3847	chrX:6347102-6349236	opa RNAi_14D	control_14D	OK	96.0744	164.69	0.777533	1.64047	0.00445	0.0386759
CR43870	CR43870	CR43870	chr3L:17245881-17264290	opa RNAi_14D	control_14D	OK	1.87253	8.15863	2.12334	1.89481	0.00445	0.0386759
dib	dib	dib	chr3L:4062291-4071717	opa RNAi_14D	control_14D	OK	12.1541	27.5618	1.18123	1.71141	0.00445	0.0386759
MED17	MED17	MED17	chr3R:18189071-18191967	opa RNAi_14D	control_14D	OK	4.86128	11.0239	1.18123	1.65632	0.00445	0.0386759
Spase12	Spase12	Spase12	chr3R:29489467-29491383	opa RNAi_14D	control_14D	OK	1324.49	799.876	-0.727586	-1.59063	0.00445	0.0386759
CG4730	CG4730	CG4730	chr3R:25665808-25678682	opa RNAi_14D	control_14D	OK	75.3297	40.2566	-0.903994	-1.64406	0.0045	0.0389819
CG7945	CG7945	CG7945	chr3L:15521710-15524137	opa RNAi_14D	control_14D	OK	663.861	406.591	-0.707303	-1.64407	0.0045	0.0389819
CG9267	CG9267	CG9267	chr2L:13415430-13500427	opa RNAi_14D	control_14D	OK	54.9271	100.966	0.878277	1.65241	0.0045	0.0389819
2020-09-02	2020-09-02	2020-09-02	chr3R:20586128-20588356	opa RNAi_14D	control_14D	OK	40.6192	75.2664	0.889845	1.63904	0.00455	0.0393289
CG12379	CG12379	CG12379	chrX:15732177-15733996	opa RNAi_14D	control_14D	OK	98.8097	46.5643	-1.08543	-1.59584	0.00455	0.0393289
Bx42	Bx42	Bx42	chrX:9103869-9106604	opa RNAi_14D	control_14D	OK	13.9905	27.8556	0.993522	1.72168	0.0046	0.0396312
CG6398	CG6398	CG6398	chrX:17828095-17841705	opa RNAi_14D	control_14D	OK	49.2331	88.6214	0.848027	1.61848	0.0046	0.0396312
Fem-1	Fem-1	Fem-1	chr2R:20661584-20667306	opa RNAi_14D	control_14D	OK	0.606882	1.65083	1.4437	1.57873	0.0046	0.0396312
CG6568	CG6568	CG6568	chr2R:17405303-17407427	opa RNAi_14D	control_14D	OK	4.38755	11.0985	1.33888	1.67322	0.00465	0.0400183
alpha-Est6	alpha-Est6	alpha-Est6	chr3R:7524566-7528777	opa RNAi_14D	control_14D	OK	0.228118	0.969918	2.08809	1.76319	0.0047	0.0401863
CG18787	CG18787	CG18787	chr2L:11996808-11999340	opa RNAi_14D	control_14D	OK	26.2142	12.1248	-1.11239	-1.64136	0.0047	0.0401863
CG31141	CG31141	CG31141	chr3R:23923299-23924319	opa RNAi_14D	control_14D	OK	5.4647	14.6479	1.42248	1.70295	0.0047	0.0401863
CG41518	CG41518	CG41518	chr3R:1588294-1588538	opa RNAi_14D	control_14D	OK	0	1.69053	inf	#NAME?	0.0047	0.0401863
E(z)	E(z)	E(z)	chr3L:10631078-10638130	opa RNAi_14D	control_14D	OK	9.57557	23.1506	1.27362	1.67376	0.0047	0.0401863
Trap1	Trap1	Trap1	chr2R:6633646-6636262	opa RNAi_14D	control_14D	OK	1.96954	4.95776	1.33183	1.67467	0.0047	0.0401863
CG18012	CG18012	CG18012	chr3R:17809400-17811126	opa RNAi_14D	control_14D	OK	12.7707	26.1202	1.03233	1.6292	0.00475	0.0405262
sced	sced	sced	chr2R:6657325-6660624	opa RNAi_14D	control_14D	OK	3.14115	1.13814	-1.46461	-1.65103	0.00475	0.0405262
Ars2	Ars2	Ars2	chr2R:6080827-6085625	opa RNAi_14D	control_14D	OK	217.147	350.695	0.691542	1.62727	0.0048	0.0406458
Atxn7	Atxn7	Atxn7	chr2L:2375840-2380506	opa RNAi_14D	control_14D	OK	6.49514	2.91238	-1.15716	-1.68284	0.0048	0.0406458
CG14798	CG14798	CG14798	chrX:1692823-1695889	opa RNAi_14D	control_14D	OK	8.70037	2.0719	-2.07012	-1.84711	0.0048	0.0406458
CG3560	CG3560	CG3560	chrX:16285952-16288533	opa RNAi_14D	control_14D	OK	3733.33	2238.2	-0.738126	-1.61046	0.0048	0.0406458
Nedd8	Nedd8	Nedd8	chr2L:18951005-18951837	opa RNAi_14D	control_14D	OK	4555.42	2789.15	-0.707759	-1.6428	0.0048	0.0406458
NHP2	NHP2	NHP2	chr3L:14801327-14802168	opa RNAi_14D	control_14D	OK	2531.04	1569.44	-0.68948	-1.64443	0.0048	0.0406458
vnc	vnc	vnc	chr3L:9972311-9974023	opa RNAi_14D	control_14D	OK	271.094	132.49	-1.0329	-1.6764	0.0048	0.0406458
CG11961	CG11961	CG11961	chr2R:19357531-19363124	opa RNAi_14D	control_14D	OK	0.537548	1.68748	1.65041	1.71907	0.00485	0.0409377
CG14480	CG14480	CG14480	chr2R:17563605-17568456	opa RNAi_14D	control_14D	OK	742.115	434.023	-0.773872	-1.63528	0.00485	0.0409377
CG5989	CG5989	CG5989	chr3L:8602410-8604149	opa RNAi_14D	control_14D	OK	8.58267	19.4104	1.17733	1.68407	0.00485	0.0409377
CG12091	CG12091	CG12091	chr3L:1534928-1536835	opa RNAi_14D	control_14D	OK	11.8361	24.3636	1.04153	1.66366	0.0049	0.0411402
CG13653	CG13653	CG13653	chr3R:25195526-25196531	opa RNAi_14D	control_14D	OK	41.5172	82.1019	0.983707	1.64725	0.0049	0.0411402
CG4306	CG4306	CG4306	chr3L:18461956-18463163	opa RNAi_14D	control_14D	OK	0.429291	2.66458	2.63388	2.09175	0.0049	0.0411402
Rim2	Rim2	Rim2	chr2L:1716243-1724388	opa RNAi_14D	control_14D	OK	0.700916	2.16962	1.63013	1.77789	0.0049	0.0411402
VhaM9.7-c	VhaM9.7-c	VhaM9.7-c	chr3L:4173883-4193788	opa RNAi_14D	control_14D	OK	662.142	394.805	-0.746	-1.631	0.0049	0.0411402
ced-6	ced-6	ced-6	chr2R:9434668-9444937	opa RNAi_14D	control_14D	OK	9.50191	4.07364	-1.2219	-1.68856	0.00495	0.0413843
CG7630	CG7630	CG7630	chr3L:17425476-17426282	opa RNAi_14D	control_14D	OK	7135.48	4407.55	-0.695034	-1.63336	0.00495	0.0413843
drm	drm	drm	chr2L:3539246-3548423	opa RNAi_14D	control_14D	OK	0.0879852	0.612914	2.80035	1.73026	0.00495	0.0413843
OstDelta	OstDelta	OstDelta	chr2R:17764573-17767145	opa RNAi_14D	control_14D	OK	46.2027	81.636	0.821228	1.62709	0.00495	0.0413843
CG33199	CG33199	CG33199	chr2R:8947680-8951086	opa RNAi_14D	control_14D	OK	163.28	87.7251	-0.896283	-1.65453	0.005	0.0417141
CG3939	CG3939	CG3939	chrX:3175017-3176223	opa RNAi_14D	control_14D	OK	55.1296	26.2382	-1.07116	-1.62633	0.005	0.0417141
Incenp	Incenp	Incenp	chr2R:7278466-7281795	opa RNAi_14D	control_14D	OK	12.1718	24.5621	1.01289	1.65826	0.0051	0.0424142
pigeon	pigeon	pigeon	chr2L:19186042-19189938	opa RNAi_14D	control_14D	OK	0.309949	0.946622	1.61076	1.59637	0.0051	0.0424142
siz	siz	siz	chr3L:21034534-21075444	opa RNAi_14D	control_14D	OK	9.35633	4.42115	-1.08152	-1.68061	0.0051	0.0424142
CG12818	CG12818	CG12818	chr3R:10331580-10332695	opa RNAi_14D	control_14D	OK	61.659	30.9309	-0.995264	-1.6432	0.00515	0.0427401
pont	pont	pont	chr3R:10262122-10263899	opa RNAi_14D	control_14D	OK	66.1438	117.137	0.824518	1.62477	0.00515	0.0427401
CG31898	CG31898	CG31898	chr2L:8400420-8403280	opa RNAi_14D	control_14D	OK	91.5644	38.6058	-1.24597	-1.74018	0.0052	0.0431099
for	for	for	chr2L:3622073-3656953	opa RNAi_14D	control_14D	OK	13.6025	6.67879	-1.02621	-1.66496	0.00525	0.0434333
Prx2540-2	Prx2540-2	Prx2540-2	chr2R:10418717-10419761	opa RNAi_14D	control_14D	OK	11.8598	27.1553	1.19515	1.65769	0.00525	0.0434333
ck	ck	ck	chr2L:15044962-15057862	opa RNAi_14D	control_14D	OK	2.49488	1.06242	-1.23162	-1.63737	0.0053	0.0437098
MAN1	MAN1	MAN1	chr2R:24033973-24036707	opa RNAi_14D	control_14D	OK	20.8692	9.64484	-1.11355	-1.71866	0.0053	0.0437098
wb	wb	wb	chr2L:14263026-14328262	opa RNAi_14D	control_14D	OK	0.850561	2.23432	1.39335	1.76074	0.0053	0.0437098
CG7609	CG7609	CG7609	chr3R:29741971-29745092	opa RNAi_14D	control_14D	OK	0.32284	1.301	2.01073	1.81331	0.00535	0.0440762
Cog7	Cog7	Cog7	chr3R:29930550-29933057	opa RNAi_14D	control_14D	OK	0.350442	1.1783	1.74947	1.67848	0.0054	0.0443495
KLHL18	KLHL18	KLHL18	chr3R:12007475-12010434	opa RNAi_14D	control_14D	OK	6.40551	14.6882	1.19728	1.67313	0.0054	0.0443495
pinta	pinta	pinta	chr3R:22423315-22424929	opa RNAi_14D	control_14D	OK	3.52143	1.30981	-1.42681	-1.62135	0.0054	0.0443495
CG4210	CG4210	CG4210	chr3R:15213973-15218874	opa RNAi_14D	control_14D	OK	139.302	70.6453	-0.97955	-1.63288	0.00545	0.0446212
CG5941	CG5941	CG5941	chrX:6037891-6039576	opa RNAi_14D	control_14D	OK	603.232	362.339	-0.735374	-1.6156	0.00545	0.0446212
Rpn12	Rpn12	Rpn12	chr3L:16583027-16584022	opa RNAi_14D	control_14D	OK	1159.5	726.65	-0.674168	-1.59716	0.00545	0.0446212
CG3731	CG3731	CG3731	chr3R:14890230-14892387	opa RNAi_14D	control_14D	OK	7.24397	17.1495	1.24331	1.6464	0.0055	0.0448448
CG5707	CG5707	CG5707	chr3L:2189159-2192221	opa RNAi_14D	control_14D	OK	1.38865	0.321366	-2.1114	-1.7731	0.0055	0.0448448
CG9257	CG9257	CG9257	chr2L:21102585-21104321	opa RNAi_14D	control_14D	OK	5.03809	11.2341	1.15693	1.58029	0.0055	0.0448448
REG	REG	REG	chrX:13212324-13214408	opa RNAi_14D	control_14D	OK	553.72	344.977	-0.682659	-1.57694	0.0055	0.0448448
Atf6	Atf6	Atf6	chr2R:5144732-5154756	opa RNAi_14D	control_14D	OK	117.227	68.3899	-0.777449	-1.60433	0.00555	0.0449743
CG31467	CG31467	CG31467	chr3R:10705169-10706863	opa RNAi_14D	control_14D	OK	0.784026	2.40656	1.618	1.69206	0.00555	0.0449743
CG5555	CG5555	CG5555	chr3R:19178084-19180538	opa RNAi_14D	control_14D	OK	3.3682	7.51622	1.15803	1.56934	0.00555	0.0449743
CG9288	CG9288	CG9288	chr3R:13779623-13780795	opa RNAi_14D	control_14D	OK	214.154	122.498	-0.805897	-1.64536	0.00555	0.0449743
janA	janA	janA	chr3R:30037983-30039533	opa RNAi_14D	control_14D	OK	1918.32	1182.05	-0.698547	-1.6059	0.00555	0.0449743
wdb	wdb	wdb	chr3R:27561674-27582241	opa RNAi_14D	control_14D	OK	10.8426	20.5844	0.924842	1.65817	0.00555	0.0449743
COQ7	COQ7	COQ7	chrX:6771224-6779659	opa RNAi_14D	control_14D	OK	45.2508	22.0669	-1.03606	-1.59751	0.0056	0.0453331
CG12129	CG12129	CG12129	chr2R:10033303-10050066	opa RNAi_14D	control_14D	OK	478.295	210.763	-1.18228	-1.6797	0.00565	0.0456911
Act87E	Act87E	Act87E	chr3R:13425832-13428375	opa RNAi_14D	control_14D	OK	0.410443	2.16808	2.40116	1.88752	0.0057	0.0459544
CG44303	CG44303	CG44303	chrX:6683797-6687420	opa RNAi_14D	control_14D	OK	304.509	118.484	-1.3618	-1.84332	0.0057	0.0459544
nrv2	nrv2	nrv2	chr2L:6789769-6798862	opa RNAi_14D	control_14D	OK	6.45279	18.9237	1.5522	1.82036	0.0057	0.0459544
CG11342	CG11342	CG11342	chr3L:4365433-4367458	opa RNAi_14D	control_14D	OK	40.0462	18.9862	-1.07671	-1.61204	0.00575	0.0460757
CG12986	CG12986	CG12986	chrX:17819154-17819685	opa RNAi_14D	control_14D	OK	54.9252	25.6368	-1.09925	-1.56466	0.00575	0.0460757
CG31064	CG31064	CG31064	chr3R:27229504-27239085	opa RNAi_14D	control_14D	OK	1.10008	2.86124	1.37903	1.63595	0.00575	0.0460757
CG42495	CG42495	CG42495	chr3L:18667360-18668135	opa RNAi_14D	control_14D	OK	67.9269	33.5968	-1.01566	-1.57559	0.00575	0.0460757
Dip2	Dip2	Dip2	chr3R:4644648-4645655	opa RNAi_14D	control_14D	OK	562.975	339.702	-0.728802	-1.59495	0.00575	0.0460757
viaf	viaf	viaf	chr3L:11990735-11993179	opa RNAi_14D	control_14D	OK	54.7845	28.1675	-0.959736	-1.5465	0.00575	0.0460757
GstE1	GstE1	GstE1	chr2R:18396637-18399223	opa RNAi_14D	control_14D	OK	453.809	269.787	-0.750268	-1.57588	0.0058	0.0464294
CG10621	CG10621	CG10621	chr2L:18952205-18954431	opa RNAi_14D	control_14D	OK	1.35497	0.294004	-2.20435	-1.59161	0.00585	0.0466408
CG10635	CG10635	CG10635	chr3L:5366454-5368008	opa RNAi_14D	control_14D	OK	378.82	200.82	-0.915611	-1.59991	0.00585	0.0466408
GckIII	GckIII	GckIII	chr3R:17085512-17087988	opa RNAi_14D	control_14D	OK	1.27657	3.13648	1.29688	1.59444	0.00585	0.0466408
RhoGAP71E	RhoGAP71E	RhoGAP71E	chr3L:15588859-15610386	opa RNAi_14D	control_14D	OK	21.6136	42.7634	0.984439	1.65239	0.00585	0.0466408
CG33635	CG33635	CG33635	chr2L:157835-158664	opa RNAi_14D	control_14D	OK	120.857	64.3715	-0.908808	-1.59315	0.0059	0.0469448
CG42337	CG42337	CG42337	chr3L:21183312-21193363	opa RNAi_14D	control_14D	OK	0.239047	0.898578	1.91035	1.75918	0.0059	0.0469448
CG12384	CG12384	CG12384	chr2R:11357901-11359176	opa RNAi_14D	control_14D	OK	100.676	49.127	-1.03513	-1.61732	0.00595	0.0472475
me31B	me31B	me31B	chr2L:10239340-10242172	opa RNAi_14D	control_14D	OK	2841.38	1778.23	-0.676153	-1.58987	0.00595	0.0472475
CG10924	CG10924	CG10924	chr2R:18527429-18535749	opa RNAi_14D	control_14D	OK	0.437499	1.53064	1.80678	1.80346	0.006	0.0474066
CG8184	CG8184	CG8184	chrX:15712627-15731935	opa RNAi_14D	control_14D	OK	0.954776	0.415223	-1.20127	-1.56845	0.006	0.0474066
Npl4	Npl4	Npl4	chr3R:25611012-25624662	opa RNAi_14D	control_14D	OK	2.70749	6.78363	1.3251	1.6624	0.006	0.0474066
p47	p47	p47	chr2R:7465017-7466759	opa RNAi_14D	control_14D	OK	4.12369	9.92609	1.26729	1.64269	0.006	0.0474066
Sym	Sym	Sym	chr3R:5738177-5742476	opa RNAi_14D	control_14D	OK	1.23723	2.77357	1.16463	1.52702	0.006	0.0474066
CG7156	CG7156	CG7156	chr3R:18236191-18242159	opa RNAi_14D	control_14D	OK	10.6725	4.57356	-1.2225	-1.64632	0.00605	0.0477539
ntc	ntc	ntc	chr3L:3714825-3806459	opa RNAi_14D	control_14D	OK	23.1863	7.53392	-1.6218	-1.79407	0.0061	0.0481006
CG42554	CG42554	CG42554	chr3L:835682-837821	opa RNAi_14D	control_14D	OK	138.578	59.7171	-1.21449	-1.67587	0.00615	0.0483502
CG7668	CG7668	CG7668	chr3L:20002735-20004834	opa RNAi_14D	control_14D	OK	583.725	366.188	-0.672705	-1.56365	0.00615	0.0483502
VhaAC45	VhaAC45	VhaAC45	chr2R:9207560-9209774	opa RNAi_14D	control_14D	OK	11.999	25.7898	1.10388	1.6498	0.00615	0.0483502
Ance-2	Ance-2	Ance-2	chr2L:13909332-13911719	opa RNAi_14D	control_14D	OK	0.148874	0.670028	2.17012	1.7442	0.0062	0.0485984
lap	lap	lap	chr3R:7186993-7200941	opa RNAi_14D	control_14D	OK	0.378048	1.13786	1.58969	1.57806	0.0062	0.0485984
Srp14	Srp14	Srp14	chr3R:20580114-20581522	opa RNAi_14D	control_14D	OK	442.335	183.626	-1.26837	-1.54821	0.0062	0.0485984
CG30401	CG30401	CG30401	chr2R:21985625-21986938	opa RNAi_14D	control_14D	OK	0.380088	1.42616	1.90774	1.66764	0.00625	0.0488934
myo	myo	myo	chr4:690685-696055	opa RNAi_14D	control_14D	OK	33.8014	18.197	-0.893379	-1.58603	0.00625	0.0488934
Cht11	Cht11	Cht11	chrX:6847876-6849517	opa RNAi_14D	control_14D	OK	14.533	6.37199	-1.18952	-1.6093	0.0063	0.0491388
smid	smid	smid	chr3L:7381613-7385637	opa RNAi_14D	control_14D	OK	16.243	31.1301	0.938489	1.60718	0.0063	0.0491388
Taf6	Taf6	Taf6	chr3L:19599087-19601382	opa RNAi_14D	control_14D	OK	3.38335	7.7463	1.19505	1.62968	0.0063	0.0491388
bxd	bxd	bxd	chr3R:16742124-16773189	opa RNAi_14D	control_14D	OK	10.4852	28.5547	1.44537	1.79917	0.00635	0.0494312
Liprin-beta	Liprin-beta	Liprin-beta	chr3L:13513253-13519605	opa RNAi_14D	control_14D	OK	57.5887	97.0051	0.752275	1.56212	0.00635	0.0494312
CG4586	CG4586	CG4586	chrX:6969917-6972265	opa RNAi_14D	control_14D	OK	1.75292	4.71924	1.4288	1.56998	0.0064	0.0497715
CR44560	CR44560	CR44560	chr3L:14245992-14247011	opa RNAi_14D	control_14D	OK	0.368242	1.73995	2.24032	1.74959	0.00645	0.0500619
Nop60B	Nop60B	Nop60B	chr2R:24174876-24186343	opa RNAi_14D	control_14D	OK	318.742	199.412	-0.676634	-1.54634	0.00645	0.0500619
CG14646	CG14646	CG14646	chr3R:4390365-4394259	opa RNAi_14D	control_14D	OK	43.2451	21.2099	-1.0278	-1.57717	0.0065	0.0503019
CG43783	CG43783	CG43783	chr3L:8932234-8954463	opa RNAi_14D	control_14D	OK	0.92527	0.149355	-2.63113	-1.88007	0.0065	0.0503019
ssx	ssx	ssx	chrX:1370579-1375257	opa RNAi_14D	control_14D	OK	9.23073	18.0505	0.967524	1.58111	0.0065	0.0503019
CG32625	CG32625	CG32625	chrX:13756163-13756826	opa RNAi_14D	control_14D	OK	1072.26	646.675	-0.729541	-1.58525	0.00655	0.050442
CG5780	CG5780	CG5780	chr2L:12692992-12694988	opa RNAi_14D	control_14D	OK	63.6134	25.427	-1.32297	-1.65713	0.00655	0.050442
f-cup	f-cup	f-cup	chr3R:13694052-13705402	opa RNAi_14D	control_14D	OK	7.70561	16.1256	1.06537	1.60069	0.00655	0.050442
l(2)35Cc	l(2)35Cc	l(2)35Cc	chr2L:15256580-15264692	opa RNAi_14D	control_14D	OK	825.129	487.146	-0.760266	-1.59744	0.00655	0.050442
slim	slim	slim	chr2R:18440964-18445526	opa RNAi_14D	control_14D	OK	3.40951	7.12562	1.06345	1.54006	0.00655	0.050442
Msp300	Msp300	Msp300	chr2L:5100876-5206993	opa RNAi_14D	control_14D	OK	0.804144	0.400066	-1.00722	-1.33117	0.0066	0.050679
TH1	TH1	TH1	chrX:16388819-16391438	opa RNAi_14D	control_14D	OK	208.44	335.068	0.684819	1.58418	0.0066	0.050679
Tob	Tob	Tob	chrX:16074716-16091495	opa RNAi_14D	control_14D	OK	14.1444	7.04729	-1.00509	-1.61149	0.0066	0.050679
CG11755	CG11755	CG11755	chr3R:8676914-8680034	opa RNAi_14D	control_14D	OK	62.2954	30.611	-1.02507	-1.59175	0.00665	0.0509147
CG31694	CG31694	CG31694	chr2L:2868626-2874489	opa RNAi_14D	control_14D	OK	19.7111	35.7321	0.858213	1.53284	0.00665	0.0509147
CG31997	CG31997	CG31997	chr4:154653-156060	opa RNAi_14D	control_14D	OK	0.433044	2.58367	2.57684	1.9405	0.00665	0.0509147
CG2116	CG2116	CG2116	chrX:8121279-8135713	opa RNAi_14D	control_14D	OK	21.147	8.908	-1.24728	-1.66261	0.0067	0.0510013
CG32590	CG32590	CG32590	chrX:14838351-14839106	opa RNAi_14D	control_14D	OK	140.165	75.6623	-0.889484	-1.57506	0.0067	0.0510013
Fhos	Fhos	Fhos	chr3L:8753618-8798719	opa RNAi_14D	control_14D	OK	0.679033	0.189728	-1.83955	-1.73715	0.0067	0.0510013
Pep	Pep	Pep	chr3L:17638102-17645036	opa RNAi_14D	control_14D	OK	79.7923	133.354	0.74094	1.60074	0.0067	0.0510013
qtc	qtc	qtc	chr2L:5060814-5070750	opa RNAi_14D	control_14D	OK	0.175994	0.507133	1.52684	1.05839	0.0067	0.0510013
retn	retn	retn	chr2R:23632609-23654820	opa RNAi_14D	control_14D	OK	63.7903	36.0144	-0.824763	-1.58399	0.0067	0.0510013
PpD3	PpD3	PpD3	chr3R:9747874-9754686	opa RNAi_14D	control_14D	OK	77.4436	41.8905	-0.886522	-1.62559	0.00675	0.0512831
vig	vig	vig	chr2L:15061655-15074383	opa RNAi_14D	control_14D	OK	36.3124	65.4541	0.850021	1.56681	0.00675	0.0512831
CG31517	CG31517	CG31517	chr3R:13948419-13949742	opa RNAi_14D	control_14D	OK	109.158	59.8023	-0.868144	-1.52544	0.0068	0.0516134
CG33774	CG33774	CG33774	chr2R:9399079-9400329	opa RNAi_14D	control_14D	OK	1360.3	792.507	-0.779429	-1.54105	0.00685	0.0518933
zen	zen	zen	chr3R:6752863-6754194	opa RNAi_14D	control_14D	OK	48.0382	23.9537	-1.00393	-1.58784	0.00685	0.0518933
Tis11	Tis11	Tis11	chrX:12659414-12682554	opa RNAi_14D	control_14D	OK	32.1237	12.5978	-1.35046	-1.46764	0.0069	0.0521223
CG13993	CG13993	CG13993	chr2L:6069078-6070686	opa RNAi_14D	control_14D	OK	999.311	598.795	-0.738872	-1.56471	0.0069	0.0521224
Nup75	Nup75	Nup75	chr2R:18160719-18167140	opa RNAi_14D	control_14D	OK	13.6401	26.8841	0.978894	1.57145	0.0069	0.0521224
CR43836	CR43836	CR43836	chrX:8907067-9054575	opa RNAi_14D	control_14D	OK	32.851	9.51966	-1.78696	-1.79315	0.00695	0.0524
cype	cype	cype	chr2L:5327226-5327969	opa RNAi_14D	control_14D	OK	8283.34	5177.65	-0.677915	-1.55542	0.00695	0.0524
alphagamma-element:CR32865	alphagamma-element:CR32865	alphagamma-element:CR32865	chr3R:12475335-12478267	opa RNAi_14D	control_14D	OK	20.1057	42.4348	1.07764	1.61554	0.007	0.0524768
CG2016	CG2016	CG2016	chr3R:4956998-4961351	opa RNAi_14D	control_14D	OK	2.27982	6.77242	1.57075	1.61595	0.007	0.0524768
CG5167	CG5167	CG5167	chr3R:12406531-12408107	opa RNAi_14D	control_14D	OK	5.99875	13.6185	1.18284	1.64566	0.007	0.0524768
CG7922	CG7922	CG7922	chr3R:21482324-21487444	opa RNAi_14D	control_14D	OK	0.256458	0.787724	1.61897	1.5435	0.007	0.0524768
ix	ix	ix	chr2R:11359436-11360163	opa RNAi_14D	control_14D	OK	381.785	225.303	-0.760896	-1.55635	0.007	0.0524768
Kmn1	Kmn1	Kmn1	chrX:11570454-11572442	opa RNAi_14D	control_14D	OK	133.173	53.735	-1.30937	-1.64554	0.007	0.0524768
CG12659	CG12659	CG12659	chrX:8590774-8591729	opa RNAi_14D	control_14D	OK	431.457	256.05	-0.75279	-1.58603	0.00705	0.0527017
CG7407	CG7407	CG7407	chr3L:21823460-21824571	opa RNAi_14D	control_14D	OK	195.857	113.892	-0.782131	-1.55211	0.00705	0.0527017
Pih1D1	Pih1D1	Pih1D1	chr2L:12713275-12744807	opa RNAi_14D	control_14D	OK	122.646	63.4198	-0.951498	-1.57098	0.00705	0.0527017
ATPsyn-beta	ATPsyn-beta	ATPsyn-beta	chr4:1029710-1034917	opa RNAi_14D	control_14D	OK	1504.76	940.943	-0.677357	-1.55997	0.0071	0.0528756
CG17712	CG17712	CG17712	chr2L:1750686-1752122	opa RNAi_14D	control_14D	OK	3.26102	7.53896	1.20904	1.53029	0.0071	0.0528756
CG6310	CG6310	CG6310	chr3L:11069045-11069864	opa RNAi_14D	control_14D	OK	31.9438	14.7206	-1.11769	-1.53986	0.0071	0.0528756
Zyx	Zyx	Zyx	chr4:1057364-1077273	opa RNAi_14D	control_14D	OK	133.816	79.5816	-0.74974	-1.56165	0.0071	0.0528756
Upf3	Upf3	Upf3	chr2R:23890511-23894987	opa RNAi_14D	control_14D	OK	127.182	74.342	-0.774647	-1.55202	0.00715	0.0531979
Acsl	Acsl	Acsl	chr2R:8665812-8683022	opa RNAi_14D	control_14D	OK	0.70674	1.85196	1.3898	1.54972	0.0072	0.0534191
CG34261	CG34261	CG34261	chr3L:21194753-21208092	opa RNAi_14D	control_14D	OK	376.83	207.441	-0.861217	-1.58384	0.0072	0.0534191
CG5355	CG5355	CG5355	chr2L:10410536-10413463	opa RNAi_14D	control_14D	OK	73.3775	124.043	0.757432	1.59617	0.0072	0.0534191
CG10283	CG10283	CG10283	chr2L:18455716-18484513	opa RNAi_14D	control_14D	OK	2.78331	6.74204	1.27638	1.63169	0.00725	0.053589
CG7414	CG7414	CG7414	chr3L:21824739-21828480	opa RNAi_14D	control_14D	OK	29.1128	60.977	1.06661	1.63103	0.00725	0.053589
Pex2	Pex2	Pex2	chr3L:8339050-8340276	opa RNAi_14D	control_14D	OK	394.615	239.78	-0.718735	-1.56131	0.00725	0.053589
ScpX	ScpX	ScpX	chr2L:18831228-18833630	opa RNAi_14D	control_14D	OK	0.430955	1.71604	1.99347	1.82616	0.00725	0.053589
CG9821	CG9821	CG9821	chr3R:8807678-8821098	opa RNAi_14D	control_14D	OK	1665.01	1037.88	-0.681895	-1.5696	0.0073	0.0538579
PDCD-5	PDCD-5	PDCD-5	chr3L:16229099-16232038	opa RNAi_14D	control_14D	OK	827.172	424.44	-0.962625	-1.60714	0.0073	0.0538579
CG12104	CG12104	CG12104	chr3L:1576698-1602674	opa RNAi_14D	control_14D	OK	180.354	87.6713	-1.04065	-1.65114	0.00735	0.0541763
CG14508	CG14508	CG14508	chr3R:29202659-29204133	opa RNAi_14D	control_14D	OK	3.85895	1.10537	-1.80368	-1.65883	0.0074	0.0544433
CR42875	CR42875	CR42875	chr3R:7128086-7129067	opa RNAi_14D	control_14D	OK	2.10431	0.423929	-2.31145	-1.83106	0.0074	0.0544433
CR44994	CR44994	CR44994	chr2L:16490223-16490890	opa RNAi_14D	control_14D	OK	3.3926	0.762512	-2.15356	-1.72036	0.00745	0.0547603
CG10465	CG10465	CG10465	chr2R:5339705-5340995	opa RNAi_14D	control_14D	OK	1116.19	712.778	-0.647053	-1.5368	0.0075	0.0549236
CG5703	CG5703	CG5703	chrX:17632088-17633509	opa RNAi_14D	control_14D	OK	154.804	89.0586	-0.797613	-1.51612	0.0075	0.0549236
DNApol-alpha73	DNApol-alpha73	DNApol-alpha73	chr3R:27239162-27241228	opa RNAi_14D	control_14D	OK	1.68278	4.16384	1.30707	1.5157	0.0075	0.0549236
Tao	Tao	Tao	chrX:19569720-19579800	opa RNAi_14D	control_14D	OK	281.513	169.387	-0.732875	-1.59051	0.0075	0.0549236
Atx-1	Atx-1	Atx-1	chrX:6823203-6824203	opa RNAi_14D	control_14D	OK	82.4293	150.395	0.867527	1.56029	0.00755	0.0551366
CG12253	CG12253	CG12253	chr2L:10987805-10989241	opa RNAi_14D	control_14D	OK	130.697	74.5377	-0.810187	-1.5468	0.00755	0.0551366
HIP	HIP	HIP	chrX:3799149-3801574	opa RNAi_14D	control_14D	OK	275.958	172.461	-0.678177	-1.53623	0.00755	0.0551366
CG32803	CG32803	CG32803	chrX:1900692-1901911	opa RNAi_14D	control_14D	OK	248.681	141.808	-0.810361	-1.58502	0.00765	0.0558154
Arl1	Arl1	Arl1	chr3L:15983134-15988041	opa RNAi_14D	control_14D	OK	200.49	112.425	-0.834567	-1.55271	0.0077	0.0558709
bcn92	bcn92	bcn92	chrX:2145135-2149647	opa RNAi_14D	control_14D	OK	538.99	326.461	-0.72335	-1.54454	0.0077	0.0558709
CG15930	CG15930	CG15930	chrX:5313257-5317295	opa RNAi_14D	control_14D	OK	1.7192	0.392033	-2.13269	-1.82687	0.0077	0.0558709
fws	fws	fws	chr2L:17478441-17481029	opa RNAi_14D	control_14D	OK	13.1275	25.4281	0.95384	1.58629	0.0077	0.0558709
mRpS33	mRpS33	mRpS33	chr3R:16434898-16436597	opa RNAi_14D	control_14D	OK	679.171	390.618	-0.798015	-1.52832	0.0077	0.0558709
Rad23	Rad23	Rad23	chr4:308092-310822	opa RNAi_14D	control_14D	OK	1227.15	781.002	-0.651916	-1.56002	0.0077	0.0558709
CG31999	CG31999	CG31999	chr4:215008-227748	opa RNAi_14D	control_14D	OK	6.56612	2.91926	-1.16944	-1.62878	0.00775	0.0561822
CG7172	CG7172	CG7172	chr3L:21568058-21568898	opa RNAi_14D	control_14D	OK	342.208	203.566	-0.749377	-1.54495	0.0078	0.0564412
Marcal1	Marcal1	Marcal1	chr2L:4955508-4958292	opa RNAi_14D	control_14D	OK	9.45563	4.51714	-1.06576	-1.53627	0.0078	0.0564412
Bdbt	Bdbt	Bdbt	chr3R:21116253-21118856	opa RNAi_14D	control_14D	OK	473.304	182.611	-1.37399	-1.62702	0.00785	0.0566992
CG7979	CG7979	CG7979	chr3L:8180922-8186671	opa RNAi_14D	control_14D	OK	5.35504	1.24715	-2.10226	-1.7762	0.00785	0.0566992
CG11127	CG11127	CG11127	chr2R:7463503-7464987	opa RNAi_14D	control_14D	OK	57.0899	98.34	0.784541	1.50339	0.0079	0.0568527
CG17002	CG17002	CG17002	chr2R:6986042-6988922	opa RNAi_14D	control_14D	OK	2.3475	5.86289	1.32049	1.57355	0.0079	0.0568527
CG2818	CG2818	CG2818	chr2L:3713359-3717773	opa RNAi_14D	control_14D	OK	4.12883	9.02572	1.12831	1.55944	0.0079	0.0568527
RASSF8	RASSF8	RASSF8	chr3R:25661711-25665640	opa RNAi_14D	control_14D	OK	28.6727	15.6463	-0.873861	-1.5142	0.0079	0.0568527
CG5880	CG5880	CG5880	chr3R:27116744-27118532	opa RNAi_14D	control_14D	OK	214.08	131.474	-0.703372	-1.50875	0.008	0.0574678
CkIIalpha-i1	CkIIalpha-i1	CkIIalpha-i1	chr3L:15816978-15818621	opa RNAi_14D	control_14D	OK	6.97813	16.2179	1.21668	1.64349	0.008	0.0574678
CG32365	CG32365	CG32365	chr3L:7869041-7894814	opa RNAi_14D	control_14D	OK	1.40229	0.476027	-1.55867	-1.48636	0.00805	0.0577221
cpx	cpx	cpx	chr3R:4280220-4304604	opa RNAi_14D	control_14D	OK	0.559958	1.54127	1.46073	1.34918	0.00805	0.0577221
CG5111	CG5111	CG5111	chr3R:25506274-25508279	opa RNAi_14D	control_14D	OK	9.66936	4.2892	-1.17271	-1.54034	0.0081	0.0579231
danr	danr	danr	chr3R:25138071-25139903	opa RNAi_14D	control_14D	OK	8.70259	18.3739	1.07814	1.57053	0.0081	0.0579231
Xpd	Xpd	Xpd	chr2R:21171000-21174504	opa RNAi_14D	control_14D	OK	2.05419	4.80979	1.2274	1.55747	0.0081	0.0579231
Ho	Ho	Ho	chr3R:11679742-11684342	opa RNAi_14D	control_14D	OK	109.403	61.9446	-0.820605	-1.52588	0.00815	0.0581229
nudE	nudE	nudE	chr3L:9898702-9903031	opa RNAi_14D	control_14D	OK	140.826	79.3408	-0.827779	-1.63501	0.00815	0.0581229
Scamp	Scamp	Scamp	chrX:15446178-15449883	opa RNAi_14D	control_14D	OK	106.098	63.4109	-0.742598	-1.53192	0.00815	0.0581229
CG34242	CG34242	CG34242	chr3L:12533995-12534403	opa RNAi_14D	control_14D	OK	242.532	126.992	-0.933434	-1.53098	0.0082	0.0584268
dnc	dnc	dnc	chrX:3176439-3348400	opa RNAi_14D	control_14D	OK	13.6015	7.65449	-0.829385	-1.49998	0.00825	0.0587302
CG10916	CG10916	CG10916	chr2R:18173668-18180197	opa RNAi_14D	control_14D	OK	16.675	2.37381	-2.81241	-2.10217	0.0083	0.05898
fwe	fwe	fwe	chr3L:15810080-15816410	opa RNAi_14D	control_14D	OK	80.9646	45.187	-0.841384	-1.52908	0.0083	0.05898
CG10463	CG10463	CG10463	chr2L:19758878-19760986	opa RNAi_14D	control_14D	OK	6.07378	12.4481	1.03526	1.47772	0.00835	0.059282
CG2187	CG2187	CG2187	chr3R:31755355-31758637	opa RNAi_14D	control_14D	OK	0.762751	0.172244	-2.14676	-1.71465	0.0084	0.0595301
Su(fu)	Su(fu)	Su(fu)	chr3R:12689872-12691468	opa RNAi_14D	control_14D	OK	36.5398	65.7683	0.847922	1.50561	0.0084	0.0595301
CG11505	CG11505	CG11505	chr3L:3224837-3236604	opa RNAi_14D	control_14D	OK	2.00785	4.20818	1.06755	1.52123	0.0085	0.0599701
CG4768	CG4768	CG4768	chrX:16792118-16796756	opa RNAi_14D	control_14D	OK	61.5718	35.1429	-0.809038	-1.53497	0.0085	0.0599701
CG6325	CG6325	CG6325	chr3R:10402966-10407285	opa RNAi_14D	control_14D	OK	4.45903	2.05399	-1.1183	-1.54262	0.0085	0.0599701
CG8503	CG8503	CG8503	chr2R:14243777-14246066	opa RNAi_14D	control_14D	OK	8.1449	17.1219	1.07188	1.53412	0.0085	0.0599701
Mvl	Mvl	Mvl	chr3R:21051382-21060800	opa RNAi_14D	control_14D	OK	0.715841	1.88114	1.39389	1.56604	0.0085	0.0599701
CG42668	CG42668	CG42668	chr3R:20309343-20324196	opa RNAi_14D	control_14D	OK	3.0653	1.33793	-1.19602	-1.51983	0.00855	0.0602154
CG18549	CG18549	CG18549	chr3R:12449295-12456355	opa RNAi_14D	control_14D	OK	2.03674	4.81358	1.24085	1.54412	0.00855	0.0602155
Ate1	Ate1	Ate1	chr2R:20254965-20257390	opa RNAi_14D	control_14D	OK	63.3608	35.5372	-0.834261	-1.46881	0.0086	0.0604062
CG34439	CG34439	CG34439	chr2R:13152884-13163948	opa RNAi_14D	control_14D	OK	2891.24	1786.14	-0.694845	-1.51797	0.0086	0.0604062
CG5535	CG5535	CG5535	chr3L:17852623-17856794	opa RNAi_14D	control_14D	OK	29.5439	14.6668	-1.01031	-1.52552	0.0086	0.0604062
CG5377	CG5377	CG5377	chr3R:22466904-22468157	opa RNAi_14D	control_14D	OK	1.53982	3.99541	1.37559	1.52297	0.00865	0.0606497
Hen1	Hen1	Hen1	chr2R:12145709-12152752	opa RNAi_14D	control_14D	OK	48.9875	92.083	0.91052	1.54206	0.00865	0.0606497
mbl	mbl	mbl	chr2R:17216548-17379376	opa RNAi_14D	control_14D	OK	2.32624	0.884849	-1.3945	-1.5121	0.0087	0.0608923
pic	pic	pic	chr3R:13052244-13056725	opa RNAi_14D	control_14D	OK	14.2814	25.4349	0.832669	1.51387	0.0087	0.0608923
Bet3	Bet3	Bet3	chr3L:9430311-9442267	opa RNAi_14D	control_14D	OK	141.728	80.5138	-0.815814	-1.50792	0.00875	0.0610801
CG4424	CG4424	CG4424	chr3R:20026486-20028040	opa RNAi_14D	control_14D	OK	54.9078	29.8024	-0.881583	-1.5108	0.00875	0.0610801
vtd	vtd	vtd	chr3L:27136524-27157999	opa RNAi_14D	control_14D	OK	159.538	97.3448	-0.712721	-1.51404	0.00875	0.0610801
CG5986	CG5986	CG5986	chr3R:24043055-24049168	opa RNAi_14D	control_14D	OK	1613.51	990.213	-0.704394	-1.54388	0.00885	0.0616693
CG9331	CG9331	CG9331	chr2L:20822827-20827744	opa RNAi_14D	control_14D	OK	11.2748	5.06032	-1.1558	-1.55827	0.00885	0.0616693
CG4702	CG4702	CG4702	chr3R:12121582-12128201	opa RNAi_14D	control_14D	OK	35.5102	16.7629	-1.08296	-1.62037	0.0089	0.0618542
Pa1	Pa1	Pa1	chrX:11359235-11360929	opa RNAi_14D	control_14D	OK	240.573	148.852	-0.692596	-1.5098	0.0089	0.0618542
Rpb4	Rpb4	Rpb4	chr3R:18252842-18255487	opa RNAi_14D	control_14D	OK	870.125	541.268	-0.68488	-1.5128	0.0089	0.0618542
CR42646	CR42646	CR42646	chr2R:5363252-5367357	opa RNAi_14D	control_14D	OK	0.603156	1.72452	1.51559	1.56357	0.00895	0.0621471
CG4537	CG4537	CG4537	chr2L:9890884-9893446	opa RNAi_14D	control_14D	OK	312.396	159.337	-0.971294	-1.52123	0.00905	0.0626764
Hsp27	Hsp27	Hsp27	chr3L:9384062-9385694	opa RNAi_14D	control_14D	OK	282.754	166.173	-0.766864	-1.51308	0.00905	0.0626764
Nnf1a	Nnf1a	Nnf1a	chr2R:20586221-20587238	opa RNAi_14D	control_14D	OK	220.184	124.683	-0.820441	-1.52726	0.00905	0.0626764
CG10479	CG10479	CG10479	chr3L:5967544-5976007	opa RNAi_14D	control_14D	OK	5.27376	12.6043	1.25701	1.56914	0.00915	0.0632582
CG10638	CG10638	CG10638	chr3L:12498105-12501311	opa RNAi_14D	control_14D	OK	60.0104	31.4694	-0.931262	-1.50994	0.00915	0.0632582
CG12848	CG12848	CG12848	chr2R:24760663-24763094	opa RNAi_14D	control_14D	OK	1042.53	646.395	-0.689601	-1.47463	0.0092	0.0634375
ptc	ptc	ptc	chr2R:8649648-8665223	opa RNAi_14D	control_14D	OK	28.7955	47.7732	0.730359	1.49256	0.0092	0.0634375
twr	twr	twr	chr3R:6657881-6660100	opa RNAi_14D	control_14D	OK	512.295	309.714	-0.72604	-1.49132	0.0092	0.0634375
Roc1a	Roc1a	Roc1a	chrX:647303-656033	opa RNAi_14D	control_14D	OK	3526.85	2282.11	-0.628012	-1.4822	0.00925	0.0636712
Spec2	Spec2	Spec2	chr3R:5616643-5624125	opa RNAi_14D	control_14D	OK	53.571	27.7171	-0.950678	-1.5163	0.00925	0.0636712
CG32221	CG32221	CG32221	chr3L:19834669-19836413	opa RNAi_14D	control_14D	OK	2.88824	0.97075	-1.57302	-1.62017	0.0093	0.0638487
Ublcp1	Ublcp1	Ublcp1	chr3R:23061492-23067259	opa RNAi_14D	control_14D	OK	327.589	204.059	-0.682899	-1.47551	0.0093	0.0638487
VhaSFD	VhaSFD	VhaSFD	chr2L:16722882-16727826	opa RNAi_14D	control_14D	OK	48.9441	85.4384	0.803749	1.55963	0.0093	0.0638487
CG7770	CG7770	CG7770	chr3L:19923670-19924688	opa RNAi_14D	control_14D	OK	438.369	264.638	-0.728123	-1.48846	0.00935	0.0641363
smg	smg	smg	chr3L:8990316-8997989	opa RNAi_14D	control_14D	OK	7.37059	3.42925	-1.10389	-1.55452	0.0094	0.0644234
CG1738	CG1738	CG1738	chrX:11349048-11349847	opa RNAi_14D	control_14D	OK	64.9367	34.5634	-0.909789	-1.47464	0.00945	0.0645981
CG2656	CG2656	CG2656	chr3R:7144723-7151270	opa RNAi_14D	control_14D	OK	141.018	80.914	-0.801414	-1.49587	0.00945	0.0645981
CG9536	CG9536	CG9536	chr2L:6474437-6476975	opa RNAi_14D	control_14D	OK	0.880632	2.2755	1.36957	1.51369	0.00945	0.0645981
scb	scb	scb	chr2R:15248783-15258498	opa RNAi_14D	control_14D	OK	0.424157	1.15847	1.44955	1.6091	0.0095	0.0648839
CG11885	CG11885	CG11885	chr2L:420894-421450	opa RNAi_14D	control_14D	OK	583.892	353.854	-0.722548	-1.48768	0.0096	0.0653974
CG32486	CG32486	CG32486	chr3L:3055907-3070839	opa RNAi_14D	control_14D	OK	3.60034	7.76617	1.10907	1.50342	0.0096	0.0653974
ico	ico	ico	chr2L:7220368-7223081	opa RNAi_14D	control_14D	OK	2.40525	5.73707	1.25413	1.52762	0.0096	0.0653974
CG43867	CG43867	CG43867	chrX:808216-927975	opa RNAi_14D	control_14D	OK	0.93654	0.404228	-1.21217	-1.44193	0.00965	0.0656815
CG10425	CG10425	CG10425	chr3R:25260962-25262498	opa RNAi_14D	control_14D	OK	32.5677	16.5748	-0.974449	-1.49814	0.0097	0.0657953
CG32230	CG32230	CG32230	chr3L:23339227-23345936	opa RNAi_14D	control_14D	OK	5252.06	3365.41	-0.6421	-1.46668	0.0097	0.0657953
noi	noi	noi	chr3R:5588872-5591459	opa RNAi_14D	control_14D	OK	45.564	78.8903	0.791953	1.51067	0.0097	0.0657953
spi	spi	spi	chr2L:19567899-19577315	opa RNAi_14D	control_14D	OK	103.781	174.725	0.75155	1.49561	0.0097	0.0657953
dream	dream	dream	chr2R:6017738-6023144	opa RNAi_14D	control_14D	OK	6.72435	1.97973	-1.76409	-1.4241	0.00975	0.0660778
Idgf4	Idgf4	Idgf4	chrX:9927972-9930948	opa RNAi_14D	control_14D	OK	176.51	285.887	0.695699	1.50244	0.0098	0.0663598
Ibf2	Ibf2	Ibf2	chr3R:9257726-9258501	opa RNAi_14D	control_14D	OK	1027.89	651.578	-0.657677	-1.48323	0.00985	0.0665275
peb	peb	peb	chrX:4617563-4627206	opa RNAi_14D	control_14D	OK	4.583	1.8591	-1.30169	-1.58149	0.00985	0.0665275
RpS17	RpS17	RpS17	chr3L:9428794-9429821	opa RNAi_14D	control_14D	OK	1317.35	833.4	-0.660557	-1.49364	0.00985	0.0665275
CG12512	CG12512	CG12512	chr2L:5339131-5342234	opa RNAi_14D	control_14D	OK	0.827611	0.154054	-2.42552	-1.87206	0.00995	0.0671455
CG13784	CG13784	CG13784	chr2L:7204537-7220033	opa RNAi_14D	control_14D	OK	22.5562	45.89	1.02466	1.47067	0.01	0.0673106
CG5056	CG5056	CG5056	chr2L:10366691-10367946	opa RNAi_14D	control_14D	OK	109.338	63.7448	-0.778411	-1.47927	0.01	0.0673106
CG6353	CG6353	CG6353	chr3R:21661185-21662972	opa RNAi_14D	control_14D	OK	77.1235	43.2256	-0.835285	-1.50319	0.01	0.0673106
hbn	hbn	hbn	chr2R:20954667-20960909	opa RNAi_14D	control_14D	OK	2.13496	4.8836	1.19373	1.46356	0.01005	0.0675322
sty	sty	sty	chr3L:3401152-3424935	opa RNAi_14D	control_14D	OK	7.23845	15.8658	1.13217	1.63683	0.01005	0.0675322
CG3800	CG3800	CG3800	chr2R:22934568-22937077	opa RNAi_14D	control_14D	OK	947.263	620.657	-0.609969	-1.48632	0.0101	0.0678106
jnj	jnj	jnj	chr3R:24189049-24193423	opa RNAi_14D	control_14D	OK	1.09561	2.49808	1.18908	1.40812	0.01015	0.0680885
CG14710	CG14710	CG14710	chr3R:11620089-11626638	opa RNAi_14D	control_14D	OK	110.806	55.6417	-0.9938	-1.49171	0.0102	0.0682503
CG8009	CG8009	CG8009	chr3L:10638145-10639678	opa RNAi_14D	control_14D	OK	1044.55	663.692	-0.654297	-1.47217	0.0102	0.0682503
ubl	ubl	ubl	chr2R:6810010-6810530	opa RNAi_14D	control_14D	OK	1358.83	836.842	-0.699337	-1.47611	0.0102	0.0682503
CG4404	CG4404	CG4404	chrX:12903744-12906018	opa RNAi_14D	control_14D	OK	6.28386	2.61668	-1.26391	-1.5243	0.01025	0.0684112
frj	frj	frj	chr2L:6456051-6459008	opa RNAi_14D	control_14D	OK	4.09777	8.31813	1.02142	1.44951	0.01025	0.0684112
Usp7	Usp7	Usp7	chrX:12022836-12029032	opa RNAi_14D	control_14D	OK	13.3942	7.44645	-0.846978	-1.46967	0.01025	0.0684112
CG31674	CG31674	CG31674	chr2L:20831261-20835840	opa RNAi_14D	control_14D	OK	19.3056	6.45488	-1.58055	-1.76536	0.0103	0.0686291
Nopp140	Nopp140	Nopp140	chr3L:21832773-21841356	opa RNAi_14D	control_14D	OK	66.1506	110.9	0.745434	1.53636	0.0103	0.0686291
Fas3	Fas3	Fas3	chr2L:18320101-18393441	opa RNAi_14D	control_14D	OK	0.0448357	0.471824	3.39553	0.559021	0.01035	0.0689042
l(1)G0289	l(1)G0289	l(1)G0289	chrX:10356828-10366273	opa RNAi_14D	control_14D	OK	22.5772	40.0101	0.8255	1.50384	0.0104	0.0690626
Naam	Naam	Naam	chr3R:19671449-19698742	opa RNAi_14D	control_14D	OK	6.30574	2.78063	-1.18125	-1.48929	0.0104	0.0690626
Rm62	Rm62	Rm62	chr3R:6000425-6008579	opa RNAi_14D	control_14D	OK	64.6008	107.001	0.727997	1.5004	0.0104	0.0690626
CG4825	CG4825	CG4825	chr3L:20522439-20526174	opa RNAi_14D	control_14D	OK	5.99376	12.0813	1.01124	1.49922	0.01045	0.0693365
pen-2	pen-2	pen-2	chr2R:18277438-18357296	opa RNAi_14D	control_14D	OK	1233.18	741.573	-0.733726	-1.45264	0.0105	0.0696098
Gtp-bp	Gtp-bp	Gtp-bp	chrX:11126876-11129087	opa RNAi_14D	control_14D	OK	0.132744	0.748018	2.49442	1.86472	0.01055	0.0698242
Txl	Txl	Txl	chr3L:5765845-5768794	opa RNAi_14D	control_14D	OK	473.709	298.335	-0.667068	-1.44877	0.01055	0.0698242
CG8613	CG8613	CG8613	chr2R:14352230-14355674	opa RNAi_14D	control_14D	OK	0.376317	1.11906	1.57227	1.57729	0.01065	0.0704271
CG42308	CG42308	CG42308	chrX:7011356-7012137	opa RNAi_14D	control_14D	OK	204.406	113.701	-0.846193	-1.47204	0.0107	0.0705807
CG6865	CG6865	CG6865	chr3L:18863646-18865514	opa RNAi_14D	control_14D	OK	1.63676	0.470937	-1.79724	-1.45995	0.0107	0.0705807
Cyp6a13	Cyp6a13	Cyp6a13	chr2R:8570498-8572147	opa RNAi_14D	control_14D	OK	1.14164	0.232226	-2.2975	-1.87426	0.0107	0.0705807
CG13252	CG13252	CG13252	chr3L:20730590-20744508	opa RNAi_14D	control_14D	OK	0.485224	0.0592239	-3.0344	-1.97476	0.01075	0.0707336
CG5626	CG5626	CG5626	chr3L:12204122-12206022	opa RNAi_14D	control_14D	OK	294.292	185.701	-0.664267	-1.45736	0.01075	0.0707336
csul	csul	csul	chr2R:16264651-16266959	opa RNAi_14D	control_14D	OK	34.5139	59.5676	0.787352	1.47055	0.01075	0.0707336
su(Hw)	su(Hw)	su(Hw)	chr3R:14302427-14308589	opa RNAi_14D	control_14D	OK	44.3259	72.8856	0.717485	1.48308	0.0108	0.0710035
Cap	Cap	Cap	chrX:16588995-16593439	opa RNAi_14D	control_14D	OK	2.11752	4.37947	1.04838	1.4396	0.01085	0.0712138
CG42855	CG42855	CG42855	chr2R:18687371-18705805	opa RNAi_14D	control_14D	OK	23.6312	9.75628	-1.27629	-1.47183	0.01085	0.0712138
Mst85C	Mst85C	Mst85C	chr3R:9042507-9052231	opa RNAi_14D	control_14D	OK	825.921	527.383	-0.647152	-1.47701	0.0109	0.0713643
PPP4R2r	PPP4R2r	PPP4R2r	chrX:10478837-10481943	opa RNAi_14D	control_14D	OK	32.2353	55.6183	0.78692	1.48562	0.0109	0.0713643
Rac2	Rac2	Rac2	chr3L:7423826-7454717	opa RNAi_14D	control_14D	OK	27.4758	50.8693	0.888634	1.47979	0.0109	0.0713643
rnh1	rnh1	rnh1	chr2R:7931053-7932380	opa RNAi_14D	control_14D	OK	97.5606	56.5437	-0.786932	-1.44795	0.011	0.0719
veil	veil	veil	chr2R:17477564-17493169	opa RNAi_14D	control_14D	OK	1.4177	4.25408	1.58529	1.49265	0.011	0.0719
CG9775	CG9775	CG9775	chr3R:4638009-4641838	opa RNAi_14D	control_14D	OK	43.4894	24.2325	-0.843722	-1.46821	0.0111	0.0724937
Nrt	Nrt	Nrt	chr3L:16766071-16779736	opa RNAi_14D	control_14D	OK	49.0386	85.965	0.809832	1.49488	0.0112	0.0730865
mRpL32	mRpL32	mRpL32	chr3R:31252871-31254900	opa RNAi_14D	control_14D	OK	423.764	257.351	-0.719525	-1.47037	0.01125	0.0733522
CG17556	CG17556	CG17556	chr3R:16994541-16996071	opa RNAi_14D	control_14D	OK	46.9174	81.8197	0.802326	1.46434	0.0113	0.073557
Gasp	Gasp	Gasp	chr3R:6088798-6100887	opa RNAi_14D	control_14D	OK	0.682799	2.15236	1.65639	1.5851	0.0113	0.073557
CG32506	CG32506	CG32506	chrX:20449330-20467065	opa RNAi_14D	control_14D	OK	0.557054	0.191309	-1.54191	-1.52003	0.01135	0.073761
CG32772	CG32772	CG32772	chrX:4909101-4915161	opa RNAi_14D	control_14D	OK	2.02383	4.74259	1.22858	1.51523	0.01135	0.073761
Ent2	Ent2	Ent2	chr2L:6562324-6566181	opa RNAi_14D	control_14D	OK	42.8545	83.6351	0.964661	1.55649	0.0114	0.0740251
CG1671	CG1671	CG1671	chr2R:9848060-9850642	opa RNAi_14D	control_14D	OK	1.21412	2.82072	1.21615	1.4117	0.01145	0.0741671
mop	mop	mop	chr3L:14769340-14776129	opa RNAi_14D	control_14D	OK	1.96842	0.908989	-1.1147	-1.41898	0.01145	0.0741671
san	san	san	chr2R:11360705-11361871	opa RNAi_14D	control_14D	OK	1749.34	1134.89	-0.624262	-1.46942	0.01145	0.0741671
T-cp1	T-cp1	T-cp1	chr3R:22489104-22491439	opa RNAi_14D	control_14D	OK	7.37116	15.5012	1.07241	1.48291	0.0115	0.0743692
Top3beta	Top3beta	Top3beta	chrX:6284137-6287990	opa RNAi_14D	control_14D	OK	1.83994	0.811682	-1.18067	-1.4183	0.0115	0.0743692
CG1602	CG1602	CG1602	chr2R:7516922-7518936	opa RNAi_14D	control_14D	OK	18.3211	9.64325	-0.925918	-1.39049	0.01155	0.0745097
Keap1	Keap1	Keap1	chr3R:17073941-17079945	opa RNAi_14D	control_14D	OK	16.6794	28.9808	0.797034	1.43289	0.01155	0.0745097
snRNA:U11	snRNA:U11	snRNA:U11	chr3L:3892573-3894833	opa RNAi_14D	control_14D	OK	16.4001	4.86758	-1.75243	-1.54685	0.01155	0.0745097
amd	amd	amd	chr2L:19110153-19114110	opa RNAi_14D	control_14D	OK	0.464768	1.78187	1.93881	1.51005	0.0116	0.0746496
CG13713	CG13713	CG13713	chr3L:4692782-4796253	opa RNAi_14D	control_14D	OK	302.439	100.557	-1.58863	-1.38875	0.0116	0.0746496
CG15525	CG15525	CG15525	chr3R:29995356-29997676	opa RNAi_14D	control_14D	OK	808.445	503.175	-0.68409	-1.45647	0.0116	0.0746496
CG17333	CG17333	CG17333	chrX:10847437-10848534	opa RNAi_14D	control_14D	OK	181.717	108.237	-0.747502	-1.42679	0.01165	0.0747888
MED19	MED19	MED19	chr3L:17843724-17846501	opa RNAi_14D	control_14D	OK	9.16772	17.3096	0.916938	1.40954	0.01165	0.0747888
SdhC	SdhC	SdhC	chr3R:11208886-11209849	opa RNAi_14D	control_14D	OK	1233.41	785.366	-0.651217	-1.44419	0.01165	0.0747888
CG5110	CG5110	CG5110	chr2L:17481230-17484307	opa RNAi_14D	control_14D	OK	315.218	151.925	-1.05299	-1.53001	0.01175	0.0753696
CG10959	CG10959	CG10959	chrX:8148782-8150686	opa RNAi_14D	control_14D	OK	0.24686	0.907844	1.87875	1.64322	0.0118	0.0755678
CG4119	CG4119	CG4119	chrX:5666051-5670652	opa RNAi_14D	control_14D	OK	4.46826	2.10234	-1.08772	-1.46138	0.0118	0.0755678
CR45362	CR45362	CR45362	chr2L:21889757-21891095	opa RNAi_14D	control_14D	OK	0.161452	1.20554	2.9005	2.05592	0.01185	0.0757653
Dref	Dref	Dref	chr2L:9964146-9967229	opa RNAi_14D	control_14D	OK	65.6444	105.749	0.687895	1.45399	0.01185	0.0757653
hts	hts	hts	chr2R:19397031-19424903	opa RNAi_14D	control_14D	OK	31.1789	55.5267	0.832614	1.48592	0.0119	0.0759621
RpS26	RpS26	RpS26	chr2L:18441334-18443277	opa RNAi_14D	control_14D	OK	3486.25	2286.44	-0.608574	-1.46109	0.0119	0.0759621
CG10584	CG10584	CG10584	chr3L:21030279-21031360	opa RNAi_14D	control_14D	OK	39.4247	20.7693	-0.924649	-1.45844	0.01195	0.0759747
CG40002	CG40002	CG40002	chr3L:24976253-24977118	opa RNAi_14D	control_14D	OK	1238.04	766.485	-0.691734	-1.45814	0.01195	0.0759747
Hpr1	Hpr1	Hpr1	chr3R:5813608-5821440	opa RNAi_14D	control_14D	OK	27.3508	46.8214	0.775584	1.40987	0.01195	0.0759747
prominin-like	prominin-like	prominin-like	chr3L:3114449-3127724	opa RNAi_14D	control_14D	OK	7.41678	13.3979	0.853147	1.4733	0.01195	0.0759747
SKIP	SKIP	SKIP	chr3R:22133829-22296126	opa RNAi_14D	control_14D	OK	8.72113	25.0798	1.52394	1.40115	0.01195	0.0759747
CG40486	CG40486	CG40486	chrX:22958855-22960091	opa RNAi_14D	control_14D	OK	3.08935	0.778215	-1.98906	-1.63266	0.01205	0.0764262
CG42239	CG42239	CG42239	chr2R:17572828-17573330	opa RNAi_14D	control_14D	OK	1260.53	791.955	-0.670535	-1.45019	0.01205	0.0764262
Cyp12e1	Cyp12e1	Cyp12e1	chr3R:10434788-10436704	opa RNAi_14D	control_14D	OK	0.514302	0.0305021	-4.07564	-1.88502	0.01205	0.0764262
CG5214	CG5214	CG5214	chr3R:11244301-11246862	opa RNAi_14D	control_14D	OK	11.2488	22.0806	0.973006	1.43628	0.0121	0.0766818
CG34191	CG34191	CG34191	chr2R:16948295-16955266	opa RNAi_14D	control_14D	OK	375.721	208.984	-0.846268	-1.49581	0.01215	0.0768755
CG4619	CG4619	CG4619	chr2L:9938862-9947648	opa RNAi_14D	control_14D	OK	15.2726	7.38346	-1.04857	-1.47897	0.01215	0.0768755
VhaM9.7-b	VhaM9.7-b	VhaM9.7-b	chr3L:21539861-21541215	opa RNAi_14D	control_14D	OK	335.136	202.137	-0.729414	-1.45284	0.0122	0.0771301
CG13933	CG13933	CG13933	chr3L:1771808-1775147	opa RNAi_14D	control_14D	OK	0.622529	2.10605	1.75832	1.78376	0.01225	0.077261
CG6182	CG6182	CG6182	chr3R:24161726-24163545	opa RNAi_14D	control_14D	OK	94.8686	43.197	-1.135	-1.49086	0.01225	0.077261
Mesh1	Mesh1	Mesh1	chr3R:29200453-29202525	opa RNAi_14D	control_14D	OK	122.508	66.4369	-0.882822	-1.45399	0.01225	0.077261
Ald	Ald	Ald	chr3R:26254068-26261591	opa RNAi_14D	control_14D	OK	85.7976	151.339	0.818776	1.53326	0.01235	0.0777676
CG17209	CG17209	CG17209	chrX:15762955-15769514	opa RNAi_14D	control_14D	OK	0.53317	0.0938661	-2.50592	-1.83941	0.01235	0.0777676
CG32066	CG32066	CG32066	chr3L:10640285-10661013	opa RNAi_14D	control_14D	OK	24.0911	42.1682	0.807654	1.4209	0.0124	0.0780204
CG8117	CG8117	CG8117	chrX:15644221-15644991	opa RNAi_14D	control_14D	OK	4.3352	1.29991	-1.73768	-1.61134	0.01245	0.0782727
alpha-Est1	alpha-Est1	alpha-Est1	chr3R:7545732-7549124	opa RNAi_14D	control_14D	OK	1.02612	0.350875	-1.54817	-1.49852	0.0127	0.0795914
cbx	cbx	cbx	chr2R:9863650-9875072	opa RNAi_14D	control_14D	OK	282.024	158.619	-0.830258	-1.47777	0.0127	0.0795914
CG32425	CG32425	CG32425	chr3L:20497322-20514107	opa RNAi_14D	control_14D	OK	7.31039	3.01382	-1.27836	-1.55124	0.0127	0.0795914
RPA2	RPA2	RPA2	chr2L:20924974-20926147	opa RNAi_14D	control_14D	OK	141.469	83.7647	-0.756068	-1.43623	0.0127	0.0795914
Scgdelta	Scgdelta	Scgdelta	chrX:1735944-1754065	opa RNAi_14D	control_14D	OK	1.83373	4.16868	1.18481	1.45256	0.01275	0.0798414
His1:CG33840	His1:CG33840	His1:CG33840	chr2L:21501632-21502655	opa RNAi_14D	control_14D	OK	1.2801	0.216438	-2.56423	-1.71616	0.0128	0.0800278
mus81	mus81	mus81	chrX:941074-945773	opa RNAi_14D	control_14D	OK	2.95014	0.868818	-1.76366	-1.63434	0.0128	0.0800278
CG11699	CG11699	CG11699	chrX:11570454-11572442	opa RNAi_14D	control_14D	OK	161.191	51.916	-1.63452	-1.53644	0.01285	0.0802136
CG42371	CG42371	CG42371	chr2L:2216502-2217246	opa RNAi_14D	control_14D	OK	169.87	97.1272	-0.806481	-1.45748	0.01285	0.0802136
Sod	Sod	Sod	chr3L:11112280-11113740	opa RNAi_14D	control_14D	OK	4013.25	2650.52	-0.598494	-1.42799	0.0129	0.0804622
dmpd	dmpd	dmpd	chr2R:10117693-10121451	opa RNAi_14D	control_14D	OK	5.4717	11.2368	1.03817	1.45962	0.01295	0.0805834
mrn	mrn	mrn	chr3L:15578768-15580537	opa RNAi_14D	control_14D	OK	2.03705	4.60072	1.17538	1.47213	0.01295	0.0805834
Rpb8	Rpb8	Rpb8	chr3L:21728931-21730454	opa RNAi_14D	control_14D	OK	288.677	171.569	-0.750663	-1.44712	0.01295	0.0805834
CG17494	CG17494	CG17494	chr2L:22579071-22585843	opa RNAi_14D	control_14D	OK	200.696	129.072	-0.636838	-1.43251	0.013	0.0807041
CR45367	CR45367	CR45367	chr2L:305934-358174	opa RNAi_14D	control_14D	OK	8.26278	21.369	1.37082	1.50441	0.013	0.0807041
Smn	Smn	Smn	chr3L:16580397-16581547	opa RNAi_14D	control_14D	OK	1500.4	981.698	-0.611998	-1.44473	0.013	0.0807041
CG14407	CG14407	CG14407	chrX:14837470-14838198	opa RNAi_14D	control_14D	OK	124.757	69.8665	-0.836453	-1.44609	0.01305	0.0809509
DNApol-eta	DNApol-eta	DNApol-eta	chr3L:21934703-21941812	opa RNAi_14D	control_14D	OK	1.27291	2.89842	1.18714	1.47299	0.0131	0.0811338
GAA1	GAA1	GAA1	chrX:5870840-5873357	opa RNAi_14D	control_14D	OK	0.773245	2.1078	1.44674	1.5377	0.0131	0.0811338
ft	ft	ft	chr2L:4198403-4221796	opa RNAi_14D	control_14D	OK	0.169201	0.511785	1.5968	1.62334	0.01315	0.0813161
thr	thr	thr	chr2R:17860759-17865963	opa RNAi_14D	control_14D	OK	6.3205	3.14747	-1.00585	-1.44911	0.01315	0.0813161
LpR2	LpR2	LpR2	chr3R:25698726-25740465	opa RNAi_14D	control_14D	OK	5.5755	2.4347	-1.19535	-1.4499	0.0133	0.0821795
mod(r)	mod(r)	mod(r)	chrX:621529-623051	opa RNAi_14D	control_14D	OK	75.5525	41.5075	-0.864106	-1.48477	0.01335	0.082424
CR45258	CR45258	CR45258	chr2L:19327366-19327963	opa RNAi_14D	control_14D	OK	28.0549	13.3383	-1.07268	-1.31835	0.0134	0.0826037
kuk	kuk	kuk	chr3R:17080243-17084781	opa RNAi_14D	control_14D	OK	436.917	666.672	0.60962	1.42433	0.0134	0.0826037
mthl7	mthl7	mthl7	chr3L:8178674-8180514	opa RNAi_14D	control_14D	OK	0.57698	0.123731	-2.22131	-1.38004	0.01345	0.0827829
oc	oc	oc	chrX:8630158-8650681	opa RNAi_14D	control_14D	OK	1.81437	0.744855	-1.28444	-1.45028	0.01345	0.0827829
Nup93-2	Nup93-2	Nup93-2	chr3R:14894783-14898372	opa RNAi_14D	control_14D	OK	4.12858	9.0183	1.12721	1.47373	0.0135	0.083026
rad50	rad50	rad50	chr2R:22421012-22425482	opa RNAi_14D	control_14D	OK	2.34114	4.8802	1.05973	1.4446	0.01355	0.0832688
nmo	nmo	nmo	chr3L:7979045-8054147	opa RNAi_14D	control_14D	OK	58.8176	94.3195	0.681309	1.38759	0.01365	0.0838182
CG32368	CG32368	CG32368	chr3L:7915436-7915846	opa RNAi_14D	control_14D	OK	9.59162	3.51544	-1.44807	-1.41949	0.01385	0.0849803
CG6201	CG6201	CG6201	chr2L:11106942-11113061	opa RNAi_14D	control_14D	OK	0.264541	1.18185	2.15948	1.66554	0.0139	0.085221
GalNAc-T2	GalNAc-T2	GalNAc-T2	chrX:18495066-18499986	opa RNAi_14D	control_14D	OK	4.20458	2.00318	-1.06967	-1.4221	0.01395	0.0854613
CG9368	CG9368	CG9368	chr3L:19601632-19604120	opa RNAi_14D	control_14D	OK	0.153564	0.723729	2.23661	1.75824	0.01405	0.0859408
Sr-CI	Sr-CI	Sr-CI	chr2L:4121701-4124153	opa RNAi_14D	control_14D	OK	0.299867	0.887606	1.5656	1.42071	0.01405	0.0859408
S	S	S	chr2L:1049673-1077815	opa RNAi_14D	control_14D	OK	3.75403	7.20221	0.939999	1.39565	0.0141	0.08618
alt	alt	alt	chr3R:17671270-17682515	opa RNAi_14D	control_14D	OK	128.054	81.8899	-0.644999	-1.42461	0.0142	0.0863906
CG14005	CG14005	CG14005	chr2L:5800516-5801975	opa RNAi_14D	control_14D	OK	48.2413	25.6829	-0.909459	-1.43951	0.0142	0.0863906
CG4562	CG4562	CG4562	chr3R:19864495-19875678	opa RNAi_14D	control_14D	OK	7.72673	3.41882	-1.17636	-1.443	0.01415	0.0863906
CG7638	CG7638	CG7638	chr3L:11109689-11112117	opa RNAi_14D	control_14D	OK	210.511	133.915	-0.652579	-1.39165	0.0142	0.0863906
Paip2	Paip2	Paip2	chr3R:12980791-12985488	opa RNAi_14D	control_14D	OK	282.363	181.185	-0.640091	-1.41912	0.0142	0.0863906
TpnC41C	TpnC41C	TpnC41C	chr2R:5065236-5070210	opa RNAi_14D	control_14D	OK	1.41474	0.255682	-2.46811	-1.64082	0.0142	0.0863906
CycH	CycH	CycH	chr3L:21821996-21823309	opa RNAi_14D	control_14D	OK	10.4024	4.70374	-1.14504	-1.45669	0.01425	0.0865616
PI31	PI31	PI31	chr2R:11939556-11970115	opa RNAi_14D	control_14D	OK	34.4318	62.1687	0.852446	1.43301	0.01425	0.0865616
CG5757	CG5757	CG5757	chr2R:18093722-18094900	opa RNAi_14D	control_14D	OK	186.57	113.296	-0.719618	-1.39915	0.0143	0.0867987
mGluR	mGluR	mGluR	chr4:936818-949441	opa RNAi_14D	control_14D	OK	1.48014	3.2332	1.12722	1.41113	0.0144	0.0872717
Tsf2	Tsf2	Tsf2	chr3L:12530435-12533724	opa RNAi_14D	control_14D	OK	1.85016	4.00162	1.11293	1.37393	0.0144	0.0872717
Pi3K21B	Pi3K21B	Pi3K21B	chr2L:297879-305233	opa RNAi_14D	control_14D	OK	0.647682	1.61715	1.32009	1.48471	0.01445	0.0875077
CG1785	CG1785	CG1785	chrX:8714935-8720277	opa RNAi_14D	control_14D	OK	25.1921	13.0705	-0.946663	-1.43639	0.01455	0.0879786
drpr	drpr	drpr	chr3L:1715594-1735767	opa RNAi_14D	control_14D	OK	2.57104	5.50727	1.09899	1.4699	0.01455	0.0879786
eIF-3p66	eIF-3p66	eIF-3p66	chr3R:23680038-23682317	opa RNAi_14D	control_14D	OK	74.6276	122.381	0.713593	1.43415	0.0146	0.0881461
Hip14	Hip14	Hip14	chr3L:15988235-15992464	opa RNAi_14D	control_14D	OK	2.63025	1.28445	-1.03405	-1.35506	0.0146	0.0881461
CG13163	CG13163	CG13163	chr2R:12321237-12326258	opa RNAi_14D	control_14D	OK	168.268	101.581	-0.728135	-1.43201	0.01465	0.0883805
CG42837	CG42837	CG42837	chr2R:16197041-16202884	opa RNAi_14D	control_14D	OK	10.1944	24.5963	1.27067	1.60728	0.0147	0.0885471
Spindly	Spindly	Spindly	chr2L:3525130-3530317	opa RNAi_14D	control_14D	OK	13.4599	25.0101	0.893842	1.43804	0.0147	0.0885471
Br140	Br140	Br140	chr2R:7272274-7278101	opa RNAi_14D	control_14D	OK	0.551519	0.208567	-1.4029	-1.45269	0.01475	0.0887131
spin	spin	spin	chr2R:16124980-16138238	opa RNAi_14D	control_14D	OK	1.8016	0.738398	-1.28681	-1.40736	0.01475	0.0887131
vih	vih	vih	chr3L:12504291-12507840	opa RNAi_14D	control_14D	OK	143.559	253.304	0.81923	1.43748	0.0148	0.0889462
CG33230	CG33230	CG33230	chr3L:1618413-1629301	opa RNAi_14D	control_14D	OK	7.97368	15.8948	0.995237	1.39361	0.01495	0.0897113
Prosbeta2	Prosbeta2	Prosbeta2	chr3L:14999950-15014062	opa RNAi_14D	control_14D	OK	451.182	286.674	-0.654301	-1.42192	0.01495	0.0897113
eIF-4a	eIF-4a	eIF-4a	chr2L:5981763-5985909	opa RNAi_14D	control_14D	OK	764.571	1142.48	0.57945	1.38496	0.015	0.089875
Mtor	Mtor	Mtor	chr2R:11852616-11861202	opa RNAi_14D	control_14D	OK	10.8095	17.9313	0.730173	1.40756	0.015	0.089875
Cyp6a14	Cyp6a14	Cyp6a14	chr2R:8564186-8567202	opa RNAi_14D	control_14D	OK	1.01125	2.20842	1.12687	1.36206	0.01505	0.0900382
Nedd4	Nedd4	Nedd4	chr3L:17529867-17546660	opa RNAi_14D	control_14D	OK	4.80147	2.3069	-1.05752	-1.404	0.01505	0.0900382
mys	mys	mys	chrX:8061644-8070237	opa RNAi_14D	control_14D	OK	6.56299	11.7575	0.841158	1.4091	0.0151	0.090269
CG8441	CG8441	CG8441	chr2R:16185121-16186506	opa RNAi_14D	control_14D	OK	817.213	534.616	-0.612208	-1.38967	0.01515	0.0904995
SmD2	SmD2	SmD2	chr3R:6344028-6345911	opa RNAi_14D	control_14D	OK	2933.13	1954.51	-0.585633	-1.39244	0.01525	0.0910281
pix	pix	pix	chr3L:8972055-8974765	opa RNAi_14D	control_14D	OK	57.9522	94.9426	0.712192	1.42576	0.0153	0.0912577
CR45175	CR45175	CR45175	chr3L:17841539-17843544	opa RNAi_14D	control_14D	OK	11.7192	4.56139	-1.36133	-1.409	0.0154	0.0917849
ApepP	ApepP	ApepP	chr2L:16888489-16917052	opa RNAi_14D	control_14D	OK	67.3106	120.599	0.841307	1.43235	0.01545	0.0918062
CG17734	CG17734	CG17734	chr3R:11242207-11243999	opa RNAi_14D	control_14D	OK	143.025	83.5102	-0.776248	-1.39868	0.01545	0.0918062
CG9099	CG9099	CG9099	chrX:16884580-16886612	opa RNAi_14D	control_14D	OK	608.241	332.157	-0.872776	-1.44606	0.01545	0.0918062
CG9318	CG9318	CG9318	chr2L:20730415-20734309	opa RNAi_14D	control_14D	OK	14.7616	25.7961	0.805305	1.40125	0.01545	0.0918062
CR31451	CR31451	CR31451	chr3R:23983502-23985065	opa RNAi_14D	control_14D	OK	0.685551	1.81654	1.40585	1.3529	0.0156	0.0926279
CR45187	CR45187	CR45187	chr3R:4402428-4402928	opa RNAi_14D	control_14D	OK	3.64431	1.0252	-1.82974	-1.46726	0.01565	0.0928551
CG30105	CG30105	CG30105	chr2R:17590963-17592509	opa RNAi_14D	control_14D	OK	1012.49	558.938	-0.857144	-1.43587	0.0157	0.0929426
Pglym78	Pglym78	Pglym78	chr3R:29148247-29151794	opa RNAi_14D	control_14D	OK	75.8032	37.0296	-1.03358	-1.50281	0.0157	0.0929426
Sirup	Sirup	Sirup	chr2L:7998868-8004286	opa RNAi_14D	control_14D	OK	86.5086	40.5223	-1.09413	-1.38234	0.0157	0.0929426
CG14545	CG14545	CG14545	chr3R:25850409-25851291	opa RNAi_14D	control_14D	OK	1.3675	3.72002	1.44377	1.41666	0.01575	0.0930297
CG34250	CG34250	CG34250	chr3L:17476221-17477103	opa RNAi_14D	control_14D	OK	20.5794	7.61599	-1.4341	-1.44104	0.01575	0.0930297
l(2)05714	l(2)05714	l(2)05714	chr2L:4969003-4973921	opa RNAi_14D	control_14D	OK	180.019	94.7718	-0.925621	-1.47113	0.01575	0.0930297
CG1523	CG1523	CG1523	chr3R:28812101-28819668	opa RNAi_14D	control_14D	OK	8.97288	23.4041	1.38312	1.45727	0.0158	0.0931858
TpnC4	TpnC4	TpnC4	chr2R:5496673-5549543	opa RNAi_14D	control_14D	OK	38.2339	0.317694	-6.91107	-1.88481	0.0158	0.0931858
CG8839	CG8839	CG8839	chr2R:12339609-12344617	opa RNAi_14D	control_14D	OK	1.97565	0.720235	-1.45579	-1.3812	0.01585	0.0934111
tko	tko	tko	chrX:2442312-2443976	opa RNAi_14D	control_14D	OK	1063.18	692.276	-0.618961	-1.3985	0.0159	0.093636
CG30108	CG30108	CG30108	chr2R:17669394-17670000	opa RNAi_14D	control_14D	OK	14.1645	6.04154	-1.22929	-1.41289	0.016	0.0941548
mRpS30	mRpS30	mRpS30	chrX:15786046-15788288	opa RNAi_14D	control_14D	OK	64.8417	38.8264	-0.739886	-1.37181	0.0161	0.0946728
CG14671	CG14671	CG14671	chr3R:5563976-5564815	opa RNAi_14D	control_14D	OK	441.974	274.54	-0.686944	-1.39667	0.01615	0.0948962
CG14438	CG14438	CG14438	chrX:6756321-6770712	opa RNAi_14D	control_14D	OK	3.18041	6.58286	1.0495	1.46543	0.0162	0.0951194
CG14512	CG14512	CG14512	chr3R:29131192-29138573	opa RNAi_14D	control_14D	OK	125.601	57.6752	-1.12283	-1.47119	0.01625	0.0953422
CR44020	CR44020	CR44020	chr3R:8934278-8938395	opa RNAi_14D	control_14D	OK	17.7953	5.76061	-1.6272	-1.4838	0.0163	0.0954939
rost	rost	rost	chr2L:8985935-8989539	opa RNAi_14D	control_14D	OK	0.772462	0.194459	-1.99	-1.29695	0.0163	0.0954939
CG14650	CG14650	CG14650	chr3R:4437386-4441328	opa RNAi_14D	control_14D	OK	7.72095	13.813	0.839176	1.37454	0.0164	0.0958667
CG4686	CG4686	CG4686	chr3R:19864495-19875678	opa RNAi_14D	control_14D	OK	64.028	28.7001	-1.15765	-1.43575	0.0164	0.0958667
spd-2	spd-2	spd-2	chr3L:16591206-16595014	opa RNAi_14D	control_14D	OK	0.81533	1.90661	1.22555	1.42986	0.0164	0.0958667
rept	rept	rept	chr3L:19255339-19257111	opa RNAi_14D	control_14D	OK	31.6686	55.0757	0.798364	1.40424	0.01645	0.0960879
CG40485	CG40485	CG40485	chrX:22960608-22962360	opa RNAi_14D	control_14D	OK	0.892655	0.182138	-2.29307	-1.53533	0.0165	0.0963089
Eph	Eph	Eph	chr4:610683-622470	opa RNAi_14D	control_14D	OK	56.0309	34.793	-0.687427	-1.38259	0.01655	0.0965295
CG2694	CG2694	CG2694	chrX:2714078-2720327	opa RNAi_14D	control_14D	OK	0.246367	2.81072	3.51206	2.37875	0.0166	0.0966074
Pis	Pis	Pis	chrX:15701450-15703770	opa RNAi_14D	control_14D	OK	26.8991	14.5631	-0.885242	-1.38165	0.0166	0.0966074
Sec61alpha	Sec61alpha	Sec61alpha	chr2L:6477181-6480575	opa RNAi_14D	control_14D	OK	15.6223	29.2542	0.90504	1.36402	0.0166	0.0966074
CG6439	CG6439	CG6439	chr3R:22016390-22019382	opa RNAi_14D	control_14D	OK	34.681	58.7458	0.760342	1.34886	0.01665	0.096756
Ino80	Ino80	Ino80	chr3R:19368994-19403153	opa RNAi_14D	control_14D	OK	0.591442	1.3461	1.18648	1.4071	0.01665	0.096756
CG42488	CG42488	CG42488	chr3R:25483097-25490936	opa RNAi_14D	control_14D	OK	3.61384	8.85802	1.29345	1.46777	0.0167	0.0969753
CG7322	CG7322	CG7322	chrX:18855872-18857757	opa RNAi_14D	control_14D	OK	0.24053	0.935063	1.95884	1.28839	0.01675	0.0971942
Eaf6	Eaf6	Eaf6	chr3L:5604789-5608300	opa RNAi_14D	control_14D	OK	199.78	119.22	-0.744793	-1.38999	0.0169	0.0978493
Elp2	Elp2	Elp2	chr2R:10645734-10648634	opa RNAi_14D	control_14D	OK	0.560336	1.49625	1.41699	1.34472	0.0169	0.0978493
snoRNA:Me18S-A1806	snoRNA:Me18S-A1806	snoRNA:Me18S-A1806	chr3L:7639716-7639794	opa RNAi_14D	control_14D	OK	0	25.7578	inf	#NAME?	0.0169	0.0978493
CG12547	CG12547	CG12547	chr2R:4785854-4788965	opa RNAi_14D	control_14D	OK	283.321	187.953	-0.592066	-1.35441	0.017	0.0982844
Pdi	Pdi	Pdi	chr3L:15137737-15142840	opa RNAi_14D	control_14D	OK	71.0173	114.58	0.690117	1.37931	0.017	0.0982844
CG11858	CG11858	CG11858	chr3R:25262740-25265721	opa RNAi_14D	control_14D	OK	588.286	357.549	-0.718375	-1.41935	0.01705	0.0983577
CG14317	CG14317	CG14317	chr3R:18081047-18082583	opa RNAi_14D	control_14D	OK	1069.42	704.196	-0.602777	-1.36546	0.01705	0.0983577
wge	wge	wge	chr3R:22710882-22721150	opa RNAi_14D	control_14D	OK	1.74992	0.846809	-1.04718	-1.36527	0.01705	0.0983577
CG17361	CG17361	CG17361	chr3L:13997190-13999251	opa RNAi_14D	control_14D	OK	49.1181	20.7162	-1.24549	-1.42893	0.01715	0.0986468
CG4294	CG4294	CG4294	chr2R:22597244-22605667	opa RNAi_14D	control_14D	OK	7.53834	13.2808	0.81702	1.38056	0.01715	0.0986468
ND23	ND23	ND23	chr3R:15836047-15837117	opa RNAi_14D	control_14D	OK	398.59	256.846	-0.634003	-1.34802	0.01715	0.0986468
Pde11	Pde11	Pde11	chr2L:18532024-18590342	opa RNAi_14D	control_14D	OK	0.57954	0.230411	-1.3307	-1.37588	0.01715	0.0986468
CR40677	CR40677	CR40677	chrX:23205195-23206126	opa RNAi_14D	control_14D	OK	14.2851	27.9144	0.966501	1.34333	0.0172	0.0987907
Pmm45A	Pmm45A	Pmm45A	chr2R:9107150-9109718	opa RNAi_14D	control_14D	OK	16.4824	28.8673	0.808513	1.38295	0.0172	0.0987907
CG32982	CG32982	CG32982	chr2L:9125736-9163721	opa RNAi_14D	control_14D	OK	12.5205	24.0739	0.943182	1.44827	0.01725	0.0987909
CG3527	CG3527	CG3527	chrX:4387675-4611385	opa RNAi_14D	control_14D	OK	1043.41	399.591	-1.38471	-1.46616	0.01725	0.0987909
MED31	MED31	MED31	chr3R:4641962-4644636	opa RNAi_14D	control_14D	OK	223.448	127.412	-0.810442	-1.4221	0.01725	0.0987909
Pex3	Pex3	Pex3	chr3L:15144354-15146379	opa RNAi_14D	control_14D	OK	95.3691	56.8468	-0.746443	-1.36022	0.01725	0.0987909
aPKC	aPKC	aPKC	chr2R:14942397-14962969	opa RNAi_14D	control_14D	OK	11.6654	21.1559	0.858829	1.40358	0.0173	0.0990056
CG11555	CG11555	CG11555	chr2L:273835-283269	opa RNAi_14D	control_14D	OK	515.836	286.114	-0.850321	-1.41055	0.01735	0.0992199
CG7519	CG7519	CG7519	chr3L:21493082-21493907	opa RNAi_14D	control_14D	OK	763.003	493.839	-0.627648	-1.37578	0.01755	0.100219
spen	spen	spen	chr2L:159031-203397	opa RNAi_14D	control_14D	OK	10.6117	16.6308	0.648203	1.36937	0.01755	0.100219
CG2811	CG2811	CG2811	chr2R:24938180-24940483	opa RNAi_14D	control_14D	OK	644.075	397.645	-0.695748	-1.39357	0.0176	0.100359
Klp68D	Klp68D	Klp68D	chr3L:11795613-11798875	opa RNAi_14D	control_14D	OK	0.585837	1.35639	1.2112	1.40017	0.0176	0.100359
CG14615	CG14615	CG14615	chrX:22444226-22449491	opa RNAi_14D	control_14D	OK	3.16909	0.772416	-2.03662	-1.59473	0.01765	0.1005
Lsp1gamma	Lsp1gamma	Lsp1gamma	chr3L:66429-68995	opa RNAi_14D	control_14D	OK	0.547838	1.46501	1.41909	1.4778	0.01765	0.1005
CG14701	CG14701	CG14701	chr3R:11231911-11235013	opa RNAi_14D	control_14D	OK	54.9713	23.4516	-1.22899	-1.40431	0.01775	0.100562
CG17068	CG17068	CG17068	chrX:20248308-20251093	opa RNAi_14D	control_14D	OK	1.08311	0.465268	-1.21905	-1.3227	0.0177	0.100562
CG3358	CG3358	CG3358	chr2R:6923365-6971637	opa RNAi_14D	control_14D	OK	23.2464	53.2876	1.19679	1.5779	0.0177	0.100562
CG7484	CG7484	CG7484	chr3L:17654616-17655645	opa RNAi_14D	control_14D	OK	161.992	94.6059	-0.775919	-1.38502	0.01775	0.100562
CG7946	CG7946	CG7946	chr3R:30052513-30056603	opa RNAi_14D	control_14D	OK	65.7627	112.045	0.768737	1.38539	0.0177	0.100562
slmb	slmb	slmb	chr3R:21119251-21127485	opa RNAi_14D	control_14D	OK	5.47473	10.1292	0.887661	1.37816	0.01775	0.100562
slpr	slpr	slpr	chrX:8165832-8177185	opa RNAi_14D	control_14D	OK	20.3498	11.8475	-0.780427	-1.39552	0.01775	0.100562
CG14341	CG14341	CG14341	chr2L:1166505-1172805	opa RNAi_14D	control_14D	OK	981.187	621.149	-0.659589	-1.39786	0.0178	0.100701
Neu2	Neu2	Neu2	chr3L:21484890-21490586	opa RNAi_14D	control_14D	OK	9.34005	4.31408	-1.11438	-1.39127	0.0178	0.100701
CG14591	CG14591	CG14591	chr2R:6036556-6040647	opa RNAi_14D	control_14D	OK	0.498418	0.101302	-2.29869	-1.34598	0.0179	0.101122
pygo	pygo	pygo	chr3R:31575834-31580699	opa RNAi_14D	control_14D	OK	8.00771	4.38136	-0.870012	-1.36128	0.0179	0.101122
CG34216	CG34216	CG34216	chr2R:7703505-7705095	opa RNAi_14D	control_14D	OK	1.72657	0.6283	-1.45839	-1.44901	0.01795	0.10126
CoVIII	CoVIII	CoVIII	chr3L:21538858-21539447	opa RNAi_14D	control_14D	OK	4337.83	2897.11	-0.58236	-1.3487	0.01795	0.10126
Rheb	Rheb	Rheb	chr3R:5568920-5570491	opa RNAi_14D	control_14D	OK	129.051	79.6026	-0.697049	-1.35405	0.018	0.10147
CG18858	CG18858,CG31683	CG18858,CG31683	chr2L:20426198-20449964	opa RNAi_14D	control_14D	OK	8.47622	2.39398	-1.14637	-2.48063	0.01805	0.101607
CG2862	CG2862	CG2862	chr2L:2770134-2771776	opa RNAi_14D	control_14D	OK	1093.7	707.442	-0.628537	-1.37454	0.01805	0.101607
CG17294	CG17294	CG17294	chr2L:8377034-8378206	opa RNAi_14D	control_14D	OK	7.15174	3.18564	-1.16671	-1.36348	0.01815	0.102097
eEF1delta	eEF1delta	eEF1delta	chr2L:10232506-10234450	opa RNAi_14D	control_14D	OK	2472.64	1673.72	-0.562992	-1.34182	0.0182	0.10216
Ir40a	Ir40a	Ir40a	chr2L:22189525-22214376	opa RNAi_14D	control_14D	OK	1.72398	0.552054	-1.64286	-1.36026	0.0182	0.10216
RpL27A	RpL27A	RpL27A	chr2L:4457185-4458364	opa RNAi_14D	control_14D	OK	56987.5	40918.3	-0.477899	-1.39849	0.0182	0.10216
CG31156	CG31156	CG31156	chr3R:22587754-22613656	opa RNAi_14D	control_14D	OK	8.29137	16.7905	1.01797	1.40527	0.01825	0.102368
RpIII128	RpIII128	RpIII128	chr2R:12039040-12042623	opa RNAi_14D	control_14D	OK	0.238597	0.654594	1.45602	1.42304	0.0183	0.102576
CG30447	CG30447	CG30447	chr2R:19947195-19948080	opa RNAi_14D	control_14D	OK	4.55551	11.0176	1.27413	1.38396	0.01845	0.103197
CR43463	CR43463	CR43463	chr2L:14359251-14361411	opa RNAi_14D	control_14D	OK	0.608414	1.56172	1.36001	1.36964	0.01845	0.103197
Trs33	Trs33	Trs33	chr3R:15348047-15350995	opa RNAi_14D	control_14D	OK	126.223	60.3176	-1.06532	-1.4004	0.01845	0.103197
cdc2c	cdc2c	cdc2c	chr3R:20735622-20739100	opa RNAi_14D	control_14D	OK	169.865	104.881	-0.695627	-1.3553	0.0185	0.103331
CG13631	CG13631	CG13631	chr3R:24769350-24770933	opa RNAi_14D	control_14D	OK	2.18302	0.591411	-1.88409	-1.51262	0.0185	0.103331
CG42368	CG42368	CG42368	chr2L:6377770-6411326	opa RNAi_14D	control_14D	OK	0.828842	1.92401	1.21495	1.37482	0.01855	0.103537
CG9305	CG9305	CG9305	chr2L:13371426-13373890	opa RNAi_14D	control_14D	OK	0.979971	2.3378	1.25434	1.37558	0.01865	0.104022
PCNA	PCNA	PCNA	chr2R:20261753-20262883	opa RNAi_14D	control_14D	OK	979.692	655.702	-0.579288	-1.35977	0.0187	0.104227
Herp	Herp	Herp	chr2L:7796313-7800058	opa RNAi_14D	control_14D	OK	1.33975	3.07052	1.19652	1.39433	0.01875	0.104432
Syp	Syp	Syp	chr3R:20756728-20810726	opa RNAi_14D	control_14D	OK	0.109374	0.572608	2.38827	0.842787	0.01895	0.105472
CG11902	CG11902	CG11902	chr3R:25335256-25340088	opa RNAi_14D	control_14D	OK	0.375249	0.973028	1.37463	1.44104	0.019	0.105676
CG4972	CG4972	CG4972	chr2L:10314791-10324990	opa RNAi_14D	control_14D	OK	29.5725	17.0019	-0.798565	-1.35146	0.01905	0.105805
CG7384	CG7384	CG7384	chr2L:10507080-10510453	opa RNAi_14D	control_14D	OK	14.5699	2.77089	-2.39457	-1.93836	0.01905	0.105805
CG9917	CG9917	CG9917	chrX:16321430-16323231	opa RNAi_14D	control_14D	OK	9.1002	4.12512	-1.14146	-1.35586	0.0191	0.106008
CG7049	CG7049	CG7049	chr3L:175111-176228	opa RNAi_14D	control_14D	OK	88.8354	53.3372	-0.735992	-1.3246	0.01915	0.106211
CG10672	CG10672	CG10672	chr3L:5139618-5141646	opa RNAi_14D	control_14D	OK	24.2788	10.6757	-1.18537	-1.38089	0.0192	0.106265
cpo	cpo	cpo	chr3R:17919831-18018892	opa RNAi_14D	control_14D	OK	0.27538	0.713413	1.37331	1.23916	0.0192	0.106265
loj	loj	loj	chr3L:6094986-6096517	opa RNAi_14D	control_14D	OK	185.737	117.123	-0.665238	-1.33775	0.0192	0.106265
CG12075	CG12075	CG12075	chrX:8838322-8872774	opa RNAi_14D	control_14D	OK	0.181878	0.525528	1.5308	1.34044	0.0193	0.106744
Wdr82	Wdr82	Wdr82	chr2L:8374460-8376797	opa RNAi_14D	control_14D	OK	289.179	186.586	-0.632126	-1.31247	0.01935	0.106946
CG13248	CG13248	CG13248	chr3L:20407102-20410566	opa RNAi_14D	control_14D	OK	1.67719	0.729827	-1.20042	-1.36704	0.0194	0.107072
CG32373	CG32373	CG32373	chr3L:7650547-7759123	opa RNAi_14D	control_14D	OK	21.3739	5.14881	-2.05354	-1.5743	0.0194	0.107072
CG42389	CG42389	CG42389	chr2L:16545015-16663218	opa RNAi_14D	control_14D	OK	0.777386	1.58648	1.02913	1.35812	0.0196	0.108025
Moca-cyp	Moca-cyp	Moca-cyp	chr3R:28340333-28345169	opa RNAi_14D	control_14D	OK	13.9444	23.7477	0.768103	1.33722	0.0196	0.108025
eIF4E-5	eIF4E-5	eIF4E-5	chr3L:7894879-7896009	opa RNAi_14D	control_14D	OK	0.215642	1.21237	2.49112	1.72775	0.0197	0.108501
app	app	app	chr3L:12206237-12266841	opa RNAi_14D	control_14D	OK	2.10867	0.886759	-1.24972	-1.38471	0.01975	0.108701
CG8358	CG8358	CG8358	chr3R:9675522-9677778	opa RNAi_14D	control_14D	OK	0.0493948	0.91563	4.21233	2.44347	0.01985	0.109175
CG40005	CG40005	CG40005	chr2L:22949037-22950476	opa RNAi_14D	control_14D	OK	0.826665	0.12325	-2.74572	-1.7417	0.0199	0.109298
RpII140	RpII140	RpII140	chr3R:14125790-14130111	opa RNAi_14D	control_14D	OK	12.0828	20.2634	0.745917	1.34314	0.0199	0.109298
Phf7	Phf7	Phf7	chrX:20160354-20165830	opa RNAi_14D	control_14D	OK	0.32257	0.932536	1.53155	1.35301	0.01995	0.109497
CG6401	CG6401	CG6401	chr2R:17737621-17739685	opa RNAi_14D	control_14D	OK	0.581832	1.55743	1.42049	1.40236	0.02	0.109695
CG32267	CG32267	CG32267	chr3L:3471554-3472113	opa RNAi_14D	control_14D	OK	2173.41	1456.37	-0.577584	-1.33923	0.02015	0.110365
CG42557	CG42557	CG42557	chr3R:29933286-29935888	opa RNAi_14D	control_14D	OK	96.7279	51.458	-0.910535	-1.36911	0.02015	0.110365
CaMKII	CaMKII	CaMKII	chr4:1035287-1053703	opa RNAi_14D	control_14D	OK	177.893	113.286	-0.651037	-1.35143	0.0203	0.110573
CG12974	CG12974	CG12974	chr3L:21281751-21285962	opa RNAi_14D	control_14D	OK	0.520166	1.42736	1.45631	1.36771	0.0203	0.110573
CG18596	CG18596	CG18596	chr3R:22375922-22379955	opa RNAi_14D	control_14D	OK	1.44516	2.95657	1.03269	1.32868	0.0203	0.110573
CG34025	CG34025	CG34025	chr3L:2959721-2961049	opa RNAi_14D	control_14D	OK	2.16287	0.278858	-2.95534	-1.77616	0.02025	0.110573
CG6750	CG6750	CG6750	chr2L:10731399-10732423	opa RNAi_14D	control_14D	OK	225.503	142.424	-0.662955	-1.34691	0.0203	0.110573
fd102C	fd102C	fd102C	chr4:836985-844529	opa RNAi_14D	control_14D	OK	9.89022	19.6849	0.993016	1.3692	0.02025	0.110573
kra	kra	kra	chr3R:5595363-5601136	opa RNAi_14D	control_14D	OK	2345.29	1574.17	-0.575173	-1.34461	0.0203	0.110573
Ranbp21	Ranbp21	Ranbp21	chrX:19646305-19652269	opa RNAi_14D	control_14D	OK	0.801813	0.332928	-1.26805	-1.4444	0.02025	0.110573
Atac2	Atac2	Atac2	chr2L:18609575-18612249	opa RNAi_14D	control_14D	OK	3.53146	7.33475	1.05448	1.39161	0.02035	0.110693
CR44299	CR44299	CR44299	chr2R:10740053-10798709	opa RNAi_14D	control_14D	OK	3.44969	1.44677	-1.25363	-1.37666	0.02035	0.110693
Hph	Hph	Hph	chr3R:5257036-5269507	opa RNAi_14D	control_14D	OK	3.94629	8.09655	1.03681	1.38354	0.0204	0.110889
CG4281	CG4281	CG4281	chrX:2062312-2065142	opa RNAi_14D	control_14D	OK	14.3382	24.7389	0.786923	1.3574	0.02045	0.111085
CG13895	CG13895	CG13895	chr3L:705947-708205	opa RNAi_14D	control_14D	OK	3.12708	6.51144	1.05816	1.35042	0.0205	0.111127
CG45263	CG45263	CG45263	chr3R:8364327-8477617	opa RNAi_14D	control_14D	OK	2.04123	4.73269	1.21322	1.3916	0.0205	0.111127
CG8461	CG8461	CG8461	chr3R:14511837-14513637	opa RNAi_14D	control_14D	OK	437.628	263.437	-0.732249	-1.34517	0.0205	0.111127
CG10470	CG10470	CG10470	chr2L:19049075-19051612	opa RNAi_14D	control_14D	OK	483.587	311.318	-0.635385	-1.32009	0.02055	0.111322
CG15480	CG15480	CG15480	chr2L:13224619-13225275	opa RNAi_14D	control_14D	OK	677.334	438.321	-0.62788	-1.34564	0.0206	0.11144
Not10	Not10	Not10	chr3R:12630646-12633025	opa RNAi_14D	control_14D	OK	1.36695	3.01413	1.14079	1.33425	0.0206	0.11144
phr6-4	phr6-4	phr6-4	chr2L:20643350-20645791	opa RNAi_14D	control_14D	OK	3.44229	7.19287	1.0632	1.36843	0.0207	0.111905
jumu	jumu	jumu	chr3R:10350181-10361612	opa RNAi_14D	control_14D	OK	15.9678	26.4981	0.730719	1.31465	0.02075	0.112098
CG15347	CG15347	CG15347	chrX:8458493-8460898	opa RNAi_14D	control_14D	OK	0.685379	2.03483	1.56994	1.3712	0.0208	0.112292
CG33978	CG33978	CG33978	chr4:157574-175874	opa RNAi_14D	control_14D	OK	0.523935	1.19042	1.18401	1.44703	0.0209	0.112371
CG4447	CG4447	CG4447	chr3L:9362107-9367046	opa RNAi_14D	control_14D	OK	232.418	120.626	-0.94618	-1.41519	0.02085	0.112371
CG7372	CG7372	CG7372	chr3L:15613183-15647762	opa RNAi_14D	control_14D	OK	20.9066	33.2695	0.670245	1.30219	0.0209	0.112371
CG9515	CG9515	CG9515	chr2L:8937389-8943257	opa RNAi_14D	control_14D	OK	112.259	66.6714	-0.75169	-1.34103	0.02085	0.112371
Rpb12	Rpb12	Rpb12	chr2R:15144967-15145519	opa RNAi_14D	control_14D	OK	2084.21	1358.91	-0.617045	-1.34367	0.0209	0.112371
scyl	scyl	scyl	chr3L:11252306-11256172	opa RNAi_14D	control_14D	OK	283.438	423.158	0.578163	1.33115	0.0209	0.112371
ppan	ppan	ppan	chr3R:21116253-21118856	opa RNAi_14D	control_14D	OK	634.484	399.498	-0.667398	-1.32695	0.02095	0.112564
CG13004	CG13004	CG13004	chrX:16826680-16835520	opa RNAi_14D	control_14D	OK	0.934644	2.19417	1.23119	1.38454	0.02105	0.112718
CG17374	CG17374	CG17374	chr3L:25752858-25762779	opa RNAi_14D	control_14D	OK	3.78323	1.96351	-0.946184	-1.31602	0.02105	0.112718
CG3860	CG3860	CG3860	chr2R:23992137-23995055	opa RNAi_14D	control_14D	OK	8.12778	3.87529	-1.06856	-1.34839	0.021	0.112718
ppa	ppa	ppa	chr2R:22684967-22688987	opa RNAi_14D	control_14D	OK	103.17	67.4297	-0.613562	-1.33445	0.02105	0.112718
Zif	Zif	Zif	chr3R:6457087-6458822	opa RNAi_14D	control_14D	OK	123.245	77.7764	-0.664123	-1.32013	0.02105	0.112718
CG1440	CG1440	CG1440	chrX:8433922-8442348	opa RNAi_14D	control_14D	OK	166.955	255.073	0.611454	1.33393	0.02115	0.112795
CG31950	CG31950	CG31950	chr2L:2878343-2879001	opa RNAi_14D	control_14D	OK	152.414	87.1478	-0.80646	-1.32014	0.02115	0.112795
CG5787	CG5787	CG5787	chr2L:12708791-12712952	opa RNAi_14D	control_14D	OK	12.5899	21.2031	0.752003	1.32772	0.02115	0.112795
RfC38	RfC38	RfC38	chr2L:11123776-11130645	opa RNAi_14D	control_14D	OK	217.998	137.821	-0.661521	-1.35002	0.0211	0.112795
ste24a	ste24a	ste24a	chr2R:17000243-17001941	opa RNAi_14D	control_14D	OK	108.75	68.1296	-0.674658	-1.33489	0.02115	0.112795
Xbp1	Xbp1	Xbp1	chr2R:21143544-21145750	opa RNAi_14D	control_14D	OK	1.45049	3.16783	1.12695	1.36508	0.0211	0.112795
Tpi	Tpi	Tpi	chr3R:30132980-30134599	opa RNAi_14D	control_14D	OK	2.14934	5.08979	1.24371	1.37608	0.0212	0.112986
Pten	Pten	Pten	chr2L:10256318-10261049	opa RNAi_14D	control_14D	OK	43.3184	26.0061	-0.736132	-1.34208	0.0213	0.113442
Bet5	Bet5	Bet5	chr3R:30180231-30181486	opa RNAi_14D	control_14D	OK	95.7212	58.7592	-0.704024	-1.28437	0.02135	0.113632
CG42671	CG42671	CG42671	chr3L:11214504-11230745	opa RNAi_14D	control_14D	OK	0.617906	0.271876	-1.18444	-1.24529	0.0214	0.113822
Cortactin	Cortactin	Cortactin	chr3R:21061679-21064471	opa RNAi_14D	control_14D	OK	19.0858	32.4761	0.766876	1.34451	0.02145	0.113858
Gdi	Gdi	Gdi	chr2L:9491175-9494876	opa RNAi_14D	control_14D	OK	13.0752	23.9389	0.872528	1.35753	0.02145	0.113858
Nab2	Nab2	Nab2	chr3R:24314659-24318419	opa RNAi_14D	control_14D	OK	9.61941	17.3633	0.852022	1.33726	0.02145	0.113858
CG33217	CG33217	CG33217	chr3L:23126024-23132209	opa RNAi_14D	control_14D	OK	603.431	406.75	-0.569047	-1.34194	0.0215	0.113894
GstT4	GstT4	GstT4	chrX:13404748-13409323	opa RNAi_14D	control_14D	OK	4.2652	9.5027	1.15572	1.29725	0.0215	0.113894
spt4	spt4	spt4	chr2R:12633588-12636141	opa RNAi_14D	control_14D	OK	939.106	594.442	-0.659753	-1.32554	0.0215	0.113894
mRpL16	mRpL16	mRpL16	chrX:1890255-1900646	opa RNAi_14D	control_14D	OK	215.672	127.157	-0.762227	-1.34089	0.0216	0.114347
CG9171	CG9171	CG9171	chr2L:5767001-5800253	opa RNAi_14D	control_14D	OK	1.13812	2.41104	1.083	1.33953	0.0217	0.1148
dod	dod	dod	chrX:21345357-21349843	opa RNAi_14D	control_14D	OK	416.491	270.352	-0.623445	-1.30864	0.02175	0.114987
CG10011	CG10011	CG10011	chr3R:28606078-28635099	opa RNAi_14D	control_14D	OK	0.706094	1.96173	1.47419	1.53234	0.0218	0.115098
CG3995	CG3995	CG3995	chr3R:17041895-17043136	opa RNAi_14D	control_14D	OK	145.232	88.782	-0.710018	-1.36501	0.0218	0.115098
Nf-YB	Nf-YB	Nf-YB	chr2L:19736043-19737088	opa RNAi_14D	control_14D	OK	374.352	241.874	-0.630142	-1.32157	0.02185	0.115285
CG12014	CG12014	CG12014	chr3L:3378267-3380083	opa RNAi_14D	control_14D	OK	0.0666386	0.571393	3.10005	1.982	0.0219	0.115394
Sps2	Sps2	Sps2	chr2L:10342593-10344223	opa RNAi_14D	control_14D	OK	114.739	70.6462	-0.699675	-1.3579	0.0219	0.115394
CG17574	CG17574	CG17574	chr2R:12849357-12869782	opa RNAi_14D	control_14D	OK	36.9052	18.0652	-1.03061	-1.3366	0.02195	0.115427
CG31472	CG31472	CG31472	chr3R:7810531-7813009	opa RNAi_14D	control_14D	OK	132.894	82.8742	-0.681285	-1.30164	0.02195	0.115427
RpI12	RpI12	RpI12	chr3R:21776137-21777847	opa RNAi_14D	control_14D	OK	85.7987	47.3143	-0.858681	-1.33349	0.02195	0.115427
CG2790	CG2790	CG2790	chr2R:24943391-24948378	opa RNAi_14D	control_14D	OK	34.8824	18.9615	-0.879427	-1.31812	0.02205	0.115799
RecQ4	RecQ4	RecQ4	chr3L:8170639-8175978	opa RNAi_14D	control_14D	OK	1.7487	3.4708	0.988984	1.31052	0.02205	0.115799
GlcAT-P	GlcAT-P	GlcAT-P	chr3L:11176953-11197536	opa RNAi_14D	control_14D	OK	0.805178	1.79264	1.1547	1.36045	0.0222	0.116509
CG4159	CG4159	CG4159	chr3R:20588710-20592671	opa RNAi_14D	control_14D	OK	44.5581	75.2437	0.755884	1.2978	0.02225	0.11654
CstF-64	CstF-64	CstF-64	chr3R:18659617-18663552	opa RNAi_14D	control_14D	OK	38.182	65.1929	0.771821	1.31545	0.02225	0.11654
Liprin-alpha	Liprin-alpha	Liprin-alpha	chr2L:6723902-6732766	opa RNAi_14D	control_14D	OK	0.565068	0.23883	-1.24244	-1.28449	0.02225	0.11654
Sema-1b	Sema-1b	Sema-1b	chr2R:17672838-17683499	opa RNAi_14D	control_14D	OK	5.92612	10.6421	0.844619	1.33664	0.02235	0.116986
fs(1)h	fs(1)h	fs(1)h	chrX:8037807-8061436	opa RNAi_14D	control_14D	OK	69.475	44.6488	-0.637873	-1.31992	0.02245	0.117432
CG42694	CG42694	CG42694	chr2R:22941876-22945147	opa RNAi_14D	control_14D	OK	49.1985	29.1821	-0.753529	-1.29074	0.0225	0.117616
Hsp23	Hsp23	Hsp23	chr3L:9381881-9382765	opa RNAi_14D	control_14D	OK	115.782	70.1215	-0.723484	-1.3002	0.02255	0.117644
schlank	schlank	schlank	chrX:6257667-6267228	opa RNAi_14D	control_14D	OK	29.2929	14.0406	-1.06094	-1.35614	0.02255	0.117644
Tim9a	Tim9a	Tim9a	chrX:13385209-13385893	opa RNAi_14D	control_14D	OK	796.713	516.632	-0.624923	-1.30593	0.02255	0.117644
CG6885	CG6885	CG6885	chr3L:18744487-18745699	opa RNAi_14D	control_14D	OK	131.478	82.6164	-0.670318	-1.28517	0.0226	0.117827
Ice	Ice	Ice	chr3R:29799657-29801584	opa RNAi_14D	control_14D	OK	68.1486	106.749	0.647471	1.31004	0.02265	0.11801
nct	nct	nct	chr3R:24851600-24856243	opa RNAi_14D	control_14D	OK	58.6711	95.6532	0.705162	1.36215	0.0227	0.118192
CG13220	CG13220	CG13220	chr2R:11284282-11285098	opa RNAi_14D	control_14D	OK	544.044	356.401	-0.610222	-1.30417	0.02275	0.118375
GlcAT-I	GlcAT-I	GlcAT-I	chrX:4131210-4132833	opa RNAi_14D	control_14D	OK	7.87995	3.47063	-1.18299	-1.35674	0.02285	0.118817
CG5367	CG5367	CG5367	chr2L:10354742-10356597	opa RNAi_14D	control_14D	OK	6.03914	2.79603	-1.11096	-1.31906	0.0229	0.118921
gb	gb	gb	chr3R:27108466-27112270	opa RNAi_14D	control_14D	OK	5.93795	11.6638	0.973996	1.34146	0.0229	0.118921
cbs	cbs	cbs	chr2R:13450585-13453393	opa RNAi_14D	control_14D	OK	0.908287	2.06239	1.1831	1.33579	0.02295	0.119102
pr	pr	pr	chr2L:20066390-20075458	opa RNAi_14D	control_14D	OK	302.563	455.006	0.588648	1.30089	0.02315	0.119983
RhoL	RhoL	RhoL	chr3R:9497100-9502581	opa RNAi_14D	control_14D	OK	3.77404	9.6329	1.35186	1.40192	0.02315	0.119983
CG43736	CG43736	CG43736	chrX:6851908-6881580	opa RNAi_14D	control_14D	OK	89.6746	41.8984	-1.0978	-1.49848	0.0232	0.120084
CSN7	CSN7	CSN7	chr2R:8421032-8428577	opa RNAi_14D	control_14D	OK	302.564	199.046	-0.604139	-1.30961	0.0232	0.120084
CG10075	CG10075	CG10075	chr3L:6955990-6958108	opa RNAi_14D	control_14D	OK	104.534	39.0226	-1.42158	-1.34672	0.02335	0.120782
CG12391	CG12391	CG12391	chr2R:11135922-11217394	opa RNAi_14D	control_14D	OK	113.609	71.082	-0.67652	-1.30948	0.0234	0.120961
Dd	Dd	Dd	chrX:21319790-21324009	opa RNAi_14D	control_14D	OK	91.1902	58.8064	-0.632905	-1.32507	0.02345	0.12114
alphaSnap	alphaSnap	alphaSnap	chr3L:20313631-20320116	opa RNAi_14D	control_14D	OK	201.397	129.986	-0.631687	-1.30002	0.0235	0.12124
CG8230	CG8230	CG8230	chr2R:8944297-8947344	opa RNAi_14D	control_14D	OK	0.441074	1.24315	1.49491	1.38443	0.0235	0.12124
Prosalpha4	Prosalpha4	Prosalpha4	chrX:16276269-16277587	opa RNAi_14D	control_14D	OK	1194.11	822.088	-0.538571	-1.28801	0.02355	0.121419
CG9636	CG9636	CG9636	chr3R:8240746-8243792	opa RNAi_14D	control_14D	OK	10.4276	18.1349	0.798365	1.30793	0.0236	0.121518
pasha	pasha	pasha	chr3R:31617976-31664646	opa RNAi_14D	control_14D	OK	12.2986	21.7209	0.820591	1.29536	0.0236	0.121518
CkIIalpha	CkIIalpha	CkIIalpha	chr3L:23097071-23103460	opa RNAi_14D	control_14D	OK	397.142	266.751	-0.57416	-1.29644	0.0237	0.121954
crm	crm	crm	chrX:2732468-2738773	opa RNAi_14D	control_14D	OK	1.47084	0.526614	-1.48182	-1.36181	0.0238	0.122309
La	La	La	chr2L:20348392-20350012	opa RNAi_14D	control_14D	OK	9.87841	18.185	0.880401	1.29892	0.0238	0.122309
RpS16	RpS16	RpS16	chr2R:22605744-22607995	opa RNAi_14D	control_14D	OK	2312.77	1585.63	-0.544563	-1.28846	0.0239	0.122744
Dph5	Dph5	Dph5	chr3R:22580772-22583225	opa RNAi_14D	control_14D	OK	311.028	158.339	-0.97403	-1.35917	0.024	0.123097
Rrp4	Rrp4	Rrp4	chr2R:23555017-23556217	opa RNAi_14D	control_14D	OK	11.7589	22.2127	0.917638	1.28595	0.024	0.123097
Nmda1	Nmda1	Nmda1	chr2R:12875163-12883253	opa RNAi_14D	control_14D	OK	34.3201	58.5999	0.771845	1.30684	0.02405	0.123274
CG34125	CG34125	CG34125	chr2L:4965672-4967775	opa RNAi_14D	control_14D	OK	1757.41	930.565	-0.917269	-1.33799	0.02415	0.123626
CG7200	CG7200	CG7200	chr2L:18156042-18159272	opa RNAi_14D	control_14D	OK	163.74	106.43	-0.621503	-1.28839	0.02415	0.123626
CG4278	CG4278	CG4278	chr2L:16327068-16329132	opa RNAi_14D	control_14D	OK	145.846	78.5876	-0.892074	-1.3003	0.0245	0.125337
CG7239	CG7239	CG7239	chr2L:5802219-5804030	opa RNAi_14D	control_14D	OK	6.19322	11.8845	0.940317	1.30665	0.02455	0.12543
GstD1	GstD1	GstD1	chr3R:12367816-12369268	opa RNAi_14D	control_14D	OK	3.82901	9.05689	1.24205	1.34799	0.02455	0.12543
CG18624	CG18624	CG18624	chrX:7893052-7893798	opa RNAi_14D	control_14D	OK	270.826	117.057	-1.21015	-1.24706	0.0248	0.126462
CG6209	CG6209	CG6209	chr2R:13623043-13749367	opa RNAi_14D	control_14D	OK	0.450695	6.22068	3.78685	2.88805	0.0248	0.126462
Rpt6R	Rpt6R	Rpt6R	chr3R:30582197-30583697	opa RNAi_14D	control_14D	OK	0.239472	0.887316	1.88959	1.39323	0.0248	0.126462
CG7927	CG7927	CG7927	chr3L:8110367-8113406	opa RNAi_14D	control_14D	OK	79.7599	121.243	0.604172	1.28518	0.02485	0.126636
noc	noc	noc	chr2L:14490858-14494019	opa RNAi_14D	control_14D	OK	8.26713	15.3212	0.890074	1.30527	0.0249	0.126727
RanGAP	RanGAP	RanGAP	chr2L:19435849-19447317	opa RNAi_14D	control_14D	OK	200.789	303.893	0.597884	1.31117	0.0249	0.126727
Cad74A	Cad74A	Cad74A	chr3L:17367752-17379530	opa RNAi_14D	control_14D	OK	0.394671	0.973115	1.30196	1.36044	0.0252	0.128172
CG12007	CG12007	CG12007	chr3R:5128086-5129939	opa RNAi_14D	control_14D	OK	18.6775	31.3231	0.745925	1.26446	0.0253	0.128597
cin	cin	cin	chrX:255673-267253	opa RNAi_14D	control_14D	OK	129.169	193.097	0.580063	1.26746	0.02535	0.128686
JhI-1	JhI-1	JhI-1	chr2R:10307029-10309794	opa RNAi_14D	control_14D	OK	1.90335	3.84998	1.01631	1.29822	0.02535	0.128686
CG5721	CG5721	CG5721	chr2R:18180495-18184090	opa RNAi_14D	control_14D	OK	8.19158	18.3259	1.16167	1.28772	0.02545	0.129111
Sec63	Sec63	Sec63	chr3L:7360560-7364366	opa RNAi_14D	control_14D	OK	4.72566	2.44657	-0.949755	-1.23324	0.0255	0.129282
CG31495	CG31495	CG31495	chr3R:13838239-13839934	opa RNAi_14D	control_14D	OK	46.2827	27.2564	-0.763878	-1.28824	0.02575	0.130466
Hel25E	Hel25E	Hel25E	chr2L:5539325-5542314	opa RNAi_14D	control_14D	OK	373.407	550.462	0.559893	1.29582	0.0258	0.130635
CG9140	CG9140	CG9140	chr2L:6060509-6062757	opa RNAi_14D	control_14D	OK	9.912	18.3082	0.885242	1.26035	0.02585	0.130805
CR32207	CR32207	CR32207	chr3L:19477328-19478720	opa RNAi_14D	control_14D	OK	1.52983	3.78911	1.30848	1.28411	0.02595	0.131143
Nnp-1	Nnp-1	Nnp-1	chr2L:13363307-13366189	opa RNAi_14D	control_14D	OK	57.495	87.6037	0.607556	1.2723	0.02595	0.131143
l(3)07882	l(3)07882	l(3)07882	chr3R:17534814-17539963	opa RNAi_14D	control_14D	OK	23.4951	38.3639	0.707389	1.29495	0.026	0.131312
CG17168	CG17168	CG17168	chrX:23082737-23084576	opa RNAi_14D	control_14D	OK	109.609	69.8261	-0.650533	-1.29166	0.0261	0.131649
CG9143	CG9143	CG9143	chr2R:20274596-20278915	opa RNAi_14D	control_14D	OK	6.94504	14.7083	1.08257	1.39149	0.0261	0.131649
mRpS16	mRpS16	mRpS16	chr2R:14170461-14173628	opa RNAi_14D	control_14D	OK	265.065	155.537	-0.769082	-1.32919	0.02625	0.132321
miple2	miple2	miple2	chr3L:271199-275018	opa RNAi_14D	control_14D	OK	8.66574	3.951	-1.1331	-1.28772	0.0264	0.132992
BtbVII	BtbVII	BtbVII	chr3L:3148645-3158408	opa RNAi_14D	control_14D	OK	1.56401	3.06495	0.970613	1.26991	0.02645	0.133074
Cdk4	Cdk4	Cdk4	chr2R:16579469-16585448	opa RNAi_14D	control_14D	OK	27.7361	14.6785	-0.918059	-1.3522	0.02645	0.133074
CG12655	CG12655	CG12655	chrX:19958392-19959403	opa RNAi_14D	control_14D	OK	2.50003	0.165752	-3.91484	-2.32955	0.0265	0.133241
Cpr57A	Cpr57A	Cpr57A	chr2R:20548367-20550117	opa RNAi_14D	control_14D	OK	0.463793	1.96226	2.08096	1.45112	0.02655	0.133408
thoc6	thoc6	thoc6	chr3L:12190732-12193688	opa RNAi_14D	control_14D	OK	418.677	281.035	-0.575089	-1.27107	0.0266	0.133489
wfs1	wfs1	wfs1	chr3R:22687541-22690380	opa RNAi_14D	control_14D	OK	0.431851	1.00534	1.21908	1.29692	0.0266	0.133489
Aats-leu	Aats-leu	Aats-leu	chr3L:4825852-4829038	opa RNAi_14D	control_14D	OK	0.59334	1.30329	1.13523	1.25424	0.02665	0.133656
snoRNA:185	snoRNA:185	snoRNA:185	chr2R:19727097-19727152	opa RNAi_14D	control_14D	OK	4795.61	1697.52	-1.49828	-1.37473	0.0267	0.133821
CG11537	CG11537	CG11537	chr3L:3128033-3143457	opa RNAi_14D	control_14D	OK	0.344604	0.809875	1.23276	1.26516	0.02675	0.133987
CG2022	CG2022	CG2022	chr3R:4986499-5011031	opa RNAi_14D	control_14D	OK	0.174676	1.40575	3.00859	1.86747	0.0268	0.134068
CR44712	CR44712	CR44712	chrX:21630935-21631433	opa RNAi_14D	control_14D	OK	4.25456	1.45399	-1.549	-1.2436	0.0268	0.134068
CG15908	CG15908	CG15908	chr2R:6668149-6668738	opa RNAi_14D	control_14D	OK	43.5899	22.8425	-0.932275	-1.29667	0.02685	0.134148
lace	lace	lace	chr2L:15499126-15505018	opa RNAi_14D	control_14D	OK	4.62285	2.12135	-1.1238	-1.32971	0.02685	0.134148
Ipk2	Ipk2	Ipk2	chr2L:573032-574264	opa RNAi_14D	control_14D	OK	3.1711	6.52723	1.04148	1.29391	0.0269	0.134313
CG33977	CG33977	CG33977	chr3R:13402558-13403051	opa RNAi_14D	control_14D	OK	15.6907	6.92069	-1.18092	-1.32271	0.027	0.134558
CG3618	CG3618	CG3618	chr3L:20813352-20816075	opa RNAi_14D	control_14D	OK	5.37081	9.89328	0.881311	1.29779	0.027	0.134558
Su(H)	Su(H)	Su(H)	chr2L:15039487-15043334	opa RNAi_14D	control_14D	OK	13.9815	23.2571	0.734152	1.25573	0.027	0.134558
Atg16	Atg16	Atg16	chr3R:29827280-29835101	opa RNAi_14D	control_14D	OK	8.36885	4.40338	-0.926417	-1.2895	0.02705	0.134722
Taf13	Taf13	Taf13	chr2L:20091434-20093849	opa RNAi_14D	control_14D	OK	1365.91	922.689	-0.565945	-1.27674	0.0271	0.134886
CG8066	CG8066	CG8066	chr3R:14567610-14568847	opa RNAi_14D	control_14D	OK	26.2751	13.4119	-0.970184	-1.29086	0.0272	0.135299
CG14829	CG14829	CG14829	chr3L:7236799-7238122	opa RNAi_14D	control_14D	OK	0.322421	1.04826	1.70098	1.29519	0.02725	0.135462
ac	ac	ac	chrX:268508-470726	opa RNAi_14D	control_14D	OK	20.4752	67.1878	1.71432	1.33553	0.02735	0.135874
Dak1	Dak1	Dak1	chr3R:26054236-26055438	opa RNAi_14D	control_14D	OK	156.629	99.2116	-0.658769	-1.30405	0.02745	0.136029
Gpdh	Gpdh	Gpdh	chr2L:5943642-5948968	opa RNAi_14D	control_14D	OK	11.5705	5.70242	-1.02081	-1.29855	0.02745	0.136029
mTerf5	mTerf5	mTerf5	chr3R:18221521-18223682	opa RNAi_14D	control_14D	OK	3.8477	7.77545	1.01493	1.3089	0.02745	0.136029
Rb97D	Rb97D	Rb97D	chr3R:26872128-26875742	opa RNAi_14D	control_14D	OK	1.94406	3.88859	1.00018	1.28213	0.02745	0.136029
AlkB	AlkB	AlkB	chrX:15858133-15859379	opa RNAi_14D	control_14D	OK	142.44	91.781	-0.63409	-1.242	0.02755	0.136354
l(2)06225	l(2)06225	l(2)06225	chr2L:10975521-10976399	opa RNAi_14D	control_14D	OK	4490.7	3075.16	-0.546281	-1.26573	0.02755	0.136354
CG15443	CG15443	CG15443	chr2L:4459728-4463447	opa RNAi_14D	control_14D	OK	81.0533	47.3524	-0.775432	-1.29355	0.0276	0.136516
RhoGAP19D	RhoGAP19D	RhoGAP19D	chrX:20469954-20510694	opa RNAi_14D	control_14D	OK	21.5122	13.7582	-0.644864	-1.2736	0.02765	0.136677
CG6000	CG6000	CG6000	chr3R:24054390-24057310	opa RNAi_14D	control_14D	OK	269.293	166.856	-0.690573	-1.26344	0.0278	0.137333
alpha4GT1	alpha4GT1	alpha4GT1	chr2L:3018507-3023141	opa RNAi_14D	control_14D	OK	21.7915	11.654	-0.902936	-1.29018	0.02795	0.137473
Atg3	Atg3	Atg3	chr3L:18748686-18750483	opa RNAi_14D	control_14D	OK	332.193	224.64	-0.564406	-1.24453	0.02795	0.137473
Cdc16	Cdc16	Cdc16	chr3R:23281200-23286041	opa RNAi_14D	control_14D	OK	35.9063	55.6767	0.632839	1.23687	0.02795	0.137473
CG10764	CG10764	CG10764	chr2R:17453398-17455729	opa RNAi_14D	control_14D	OK	0.574255	1.59631	1.47498	1.37921	0.02795	0.137473
Ect3	Ect3	Ect3	chr3R:11994174-12005473	opa RNAi_14D	control_14D	OK	0.554396	1.30502	1.23508	1.20702	0.02795	0.137473
p38c	p38c	p38c	chr3R:24149019-24150203	opa RNAi_14D	control_14D	OK	4.08018	9.13981	1.16353	1.31605	0.02795	0.137473
P5CDh2	P5CDh2	P5CDh2	chr3R:21877869-21884454	opa RNAi_14D	control_14D	OK	20.7905	10.6695	-0.962425	-1.30356	0.0279	0.137473
CG10973	CG10973	CG10973	chr3L:12750118-12754774	opa RNAi_14D	control_14D	OK	247.347	146.949	-0.751222	-1.28857	0.028	0.137633
CG1360	CG1360	CG1360	chr2R:7587772-7590109	opa RNAi_14D	control_14D	OK	4.32787	8.36258	0.950292	1.29609	0.02815	0.137942
CG9281	CG9281	CG9281	chrX:15704124-15710539	opa RNAi_14D	control_14D	OK	40.2749	24.4078	-0.722538	-1.29035	0.0281	0.137942
Dlic	Dlic	Dlic	chrX:11154420-11164670	opa RNAi_14D	control_14D	OK	14.7824	7.55836	-0.967733	-1.32317	0.02815	0.137942
gny	gny	gny	chr2L:10380102-10384723	opa RNAi_14D	control_14D	OK	71.9772	44.755	-0.685491	-1.2614	0.02815	0.137942
Ppcs	Ppcs	Ppcs	chr3R:19139053-19147910	opa RNAi_14D	control_14D	OK	0.714039	0.290366	-1.29813	-1.27943	0.02815	0.137942
CG7337	CG7337	CG7337	chr2L:1884621-1944289	opa RNAi_14D	control_14D	OK	1.88275	0.981659	-0.939552	-1.24528	0.02825	0.138261
P5cr	P5cr	P5cr	chr3R:19028930-19031271	opa RNAi_14D	control_14D	OK	20.7384	1.37323	-3.91666	-1.06753	0.02825	0.138261
CG11695	CG11695	CG11695	chrX:11576882-11578806	opa RNAi_14D	control_14D	OK	0.264636	0.939866	1.82845	1.35829	0.02835	0.138579
CR45036	CR45036	CR45036	chr3L:11361985-11365897	opa RNAi_14D	control_14D	OK	2.5239	0.875487	-1.5275	-1.38574	0.02835	0.138579
CG8270	CG8270	CG8270	chr3L:6488680-6491210	opa RNAi_14D	control_14D	OK	10.4353	18.7999	0.849258	1.28529	0.0285	0.13914
Esp	Esp	Esp	chr3R:24841934-24850412	opa RNAi_14D	control_14D	OK	0.183842	0.546073	1.57063	1.18097	0.0285	0.13914
CG9304	CG9304	CG9304	chr2R:21973121-21976386	opa RNAi_14D	control_14D	OK	4.33942	7.88162	0.86099	1.24816	0.0286	0.139542
fd64A	fd64A	fd64A	chr3L:4018877-4021279	opa RNAi_14D	control_14D	OK	0.441973	1.56546	1.82456	1.39761	0.02865	0.1397
CG14894	CG14894	CG14894	chr3R:16441842-16443007	opa RNAi_14D	control_14D	OK	503.239	341.722	-0.558419	-1.24257	0.0288	0.140086
MED18	MED18	MED18	chrX:1865908-1873565	opa RNAi_14D	control_14D	OK	173.88	91.0714	-0.933019	-1.27733	0.0288	0.140086
Snx1	Snx1	Snx1	chr2L:3449682-3452106	opa RNAi_14D	control_14D	OK	0.175353	0.608068	1.79397	1.33995	0.02875	0.140086
tra	tra	tra	chr3L:16588474-16591050	opa RNAi_14D	control_14D	OK	96.5899	42.0612	-1.19938	-1.25917	0.0288	0.140086
l(3)neo18	l(3)neo18	l(3)neo18	chr3L:12136966-12138584	opa RNAi_14D	control_14D	OK	877.338	595.524	-0.558975	-1.24789	0.02885	0.140243
CG34159	CG34159	CG34159	chr2L:10202519-10204317	opa RNAi_14D	control_14D	OK	2204.51	1524.99	-0.531656	-1.26774	0.029	0.140799
Use1	Use1	Use1	chr3L:9134559-9137181	opa RNAi_14D	control_14D	OK	86.7948	51.1093	-0.764024	-1.25607	0.029	0.140799
CG12926	CG12926	CG12926	chr2R:9607291-9610290	opa RNAi_14D	control_14D	OK	5.61382	1.58671	-1.82294	-1.24808	0.02905	0.140955
Corp	Corp	Corp	chrX:8252669-8367169	opa RNAi_14D	control_14D	OK	131.225	64.7369	-1.01938	-1.30184	0.0291	0.141024
Ugt35a	Ugt35a	Ugt35a	chr3R:11170816-11172664	opa RNAi_14D	control_14D	OK	0.647406	0.0963489	-2.74833	-1.63444	0.0291	0.141024
CG7593	CG7593	CG7593	chr3R:29723162-29724950	opa RNAi_14D	control_14D	OK	350.276	227.598	-0.622003	-1.24137	0.02915	0.14118
CG9132	CG9132	CG9132	chrX:16796901-16800710	opa RNAi_14D	control_14D	OK	3.27805	6.73173	1.03814	1.31614	0.02925	0.141578
CG3408	CG3408	CG3408	chr3L:9506817-9509583	opa RNAi_14D	control_14D	OK	21.0934	11.5159	-0.873162	-1.26904	0.02935	0.141888
CG5946	CG5946	CG5946	chr3L:11815443-11822275	opa RNAi_14D	control_14D	OK	64.315	35.3887	-0.861866	-1.28167	0.02935	0.141888
lin-28	lin-28	lin-28	chr3L:5654680-5657384	opa RNAi_14D	control_14D	OK	14.7132	27.6693	0.911176	1.29145	0.02945	0.142285
CG8944	CG8944	CG8944	chrX:15741342-15746231	opa RNAi_14D	control_14D	OK	6.33992	3.57777	-0.825404	-1.22131	0.0295	0.142439
Dcp2	Dcp2	Dcp2	chr3L:15818733-15826423	opa RNAi_14D	control_14D	OK	17.7371	27.6164	0.638759	1.24473	0.02965	0.142989
NP15.6	NP15.6	NP15.6	chr3R:19025098-19028857	opa RNAi_14D	control_14D	OK	899.219	609.447	-0.561172	-1.24474	0.02965	0.142989
CG5886	CG5886	CG5886	chr3R:25851631-25853989	opa RNAi_14D	control_14D	OK	52.7169	32.9146	-0.679538	-1.23875	0.02975	0.143384
Aats-asn	Aats-asn	Aats-asn	chr2L:19129468-19131954	opa RNAi_14D	control_14D	OK	5.16317	10.1143	0.970073	1.29449	0.0298	0.14345
l(3)76BDr	l(3)76BDr	l(3)76BDr	chr3L:19544344-19552290	opa RNAi_14D	control_14D	OK	0.92655	1.94512	1.06992	1.28442	0.0298	0.14345
Brca2	Brca2	Brca2	chr2R:24526171-24531272	opa RNAi_14D	control_14D	OK	0.839368	1.91056	1.18662	1.29172	0.0299	0.143844
CG12721	CG12721	CG12721	chrX:12043697-12335214	opa RNAi_14D	control_14D	OK	371.883	221.083	-0.750263	-1.2416	0.02995	0.143909
nAChRbeta2	nAChRbeta2	nAChRbeta2	chr3R:24509227-24515106	opa RNAi_14D	control_14D	OK	0.487673	1.41244	1.53421	1.38265	0.02995	0.143909
Tom20	Tom20	Tom20	chr3L:19997713-20002446	opa RNAi_14D	control_14D	OK	3224.77	2143.86	-0.58899	-1.25428	0.03	0.144062
CG11966	CG11966	CG11966	chr3R:8950245-8963037	opa RNAi_14D	control_14D	OK	0.965978	2.33058	1.27062	1.30923	0.03005	0.144192
CG7737	CG7737	CG7737	chr2R:11222870-11232516	opa RNAi_14D	control_14D	OK	5.85846	10.9051	0.896414	1.25386	0.0301	0.144192
mtacp1	mtacp1	mtacp1	chr3L:1329948-1331631	opa RNAi_14D	control_14D	OK	146.27	87.7496	-0.737165	-1.26056	0.0301	0.144192
wls	wls	wls	chr3L:11164970-11169625	opa RNAi_14D	control_14D	OK	17.6109	29.3756	0.738149	1.26626	0.0301	0.144192
vnd	vnd	vnd	chrX:582120-620195	opa RNAi_14D	control_14D	OK	12.8538	7.22592	-0.830945	-1.24591	0.03025	0.144823
Dip1	Dip1	Dip1	chrX:9158621-9159375	opa RNAi_14D	control_14D	OK	28.7907	14.8751	-0.952703	-1.25747	0.0304	0.145453
CG1116	CG1116	CG1116	chr3R:5219656-5221548	opa RNAi_14D	control_14D	OK	8.46871	15.4455	0.86697	1.25221	0.03045	0.145516
SMC1	SMC1	SMC1	chr3R:24058286-24062815	opa RNAi_14D	control_14D	OK	1.40385	2.76464	0.977697	1.25899	0.03045	0.145516
CG1091	CG1091	CG1091	chr3R:7082181-7086083	opa RNAi_14D	control_14D	OK	66.5112	129.993	0.966759	1.35705	0.0305	0.145579
CG5706	CG5706	CG5706	chr3R:24250459-24252679	opa RNAi_14D	control_14D	OK	0.864925	2.04519	1.24159	1.29756	0.0305	0.145579
CG6729	CG6729	CG6729	chr2L:10740781-10743935	opa RNAi_14D	control_14D	OK	0.224137	0.610468	1.44553	1.28449	0.03055	0.14573
CG14907	CG14907	CG14907	chr3R:16651216-16652319	opa RNAi_14D	control_14D	OK	17.7387	9.91395	-0.839367	-1.18938	0.03065	0.146119
CG7182	CG7182	CG7182	chr3L:8344420-8346382	opa RNAi_14D	control_14D	OK	15.9784	26.9144	0.752258	1.20794	0.0308	0.146657
pip	pip	pip	chr3L:19294766-19337609	opa RNAi_14D	control_14D	OK	0.450824	2.70284	2.58384	0.74448	0.0308	0.146657
Tak1	Tak1	Tak1	chrX:20515907-20524928	opa RNAi_14D	control_14D	OK	7.01766	3.34017	-1.07107	-1.18231	0.03085	0.146807
Pp2B-14D	Pp2B-14D	Pp2B-14D	chrX:16554626-16560016	opa RNAi_14D	control_14D	OK	1.02521	0.385265	-1.412	-1.38542	0.0309	0.146956
His1:CG33813	His1:CG33813	His1:CG33813	chr2L:21421854-21422877	opa RNAi_14D	control_14D	OK	7.7236	3.70735	-1.05889	-1.26489	0.031	0.147343
Sdc	Sdc	Sdc	chr2R:21389404-21481176	opa RNAi_14D	control_14D	OK	214.681	320.642	0.578767	1.27851	0.03105	0.147492
GLaz	GLaz	GLaz	chr2R:13163958-13168032	opa RNAi_14D	control_14D	OK	3.62024	7.63465	1.07648	1.30562	0.0312	0.147938
Ntf-2	Ntf-2	Ntf-2	chrX:21035468-21041467	opa RNAi_14D	control_14D	OK	4674.97	3222.71	-0.536682	-1.24346	0.0312	0.147938
Prosbeta1	Prosbeta1	Prosbeta1	chr2R:16008338-16014787	opa RNAi_14D	control_14D	OK	1561.23	1074.71	-0.538729	-1.2461	0.0312	0.147938
CG42542	CG42542	CG42542	chr3R:15196597-15206447	opa RNAi_14D	control_14D	OK	290.806	195.376	-0.573804	-1.24471	0.0313	0.148146
CG6404	CG6404	CG6404	chr3L:10884260-10886471	opa RNAi_14D	control_14D	OK	4.89657	9.18034	0.906777	1.23709	0.0313	0.148146
CG6927	CG6927	CG6927	chrX:4906899-4908821	opa RNAi_14D	control_14D	OK	0.181518	0.55642	1.61606	1.26893	0.0313	0.148146
mnb	mnb	mnb	chrX:17861001-17887222	opa RNAi_14D	control_14D	OK	207.53	143.257	-0.534716	-1.24964	0.03155	0.14924
CG3678	CG3678	CG3678	chr3R:16988565-16991878	opa RNAi_14D	control_14D	OK	103.157	65.2567	-0.660639	-1.22776	0.0316	0.149298
S1P	S1P	S1P	chr3L:21613796-21617376	opa RNAi_14D	control_14D	OK	2.2054	4.31503	0.968331	1.25981	0.0316	0.149298
CG42553	CG42553	CG42553	chr3L:834092-835515	opa RNAi_14D	control_14D	OK	17.8934	9.91884	-0.851185	-1.23185	0.03165	0.149445
CG18508	CG18508	CG18508	chrX:3172267-3173140	opa RNAi_14D	control_14D	OK	518.802	343.219	-0.596055	-1.2159	0.0317	0.149502
Eap	Eap	Eap	chr2R:24780916-24783500	opa RNAi_14D	control_14D	OK	65.7896	34.6873	-0.92345	-1.25614	0.0317	0.149502
CG13428	CG13428	CG13428	chr2R:20539511-20540448	opa RNAi_14D	control_14D	OK	61.4084	33.1665	-0.888706	-1.25761	0.03175	0.149649
CG33090	CG33090	CG33090	chr2L:14334157-14345795	opa RNAi_14D	control_14D	OK	0.619689	0.238096	-1.38	-1.22268	0.0318	0.149795
CG7394	CG7394	CG7394	chr3L:11522756-11564312	opa RNAi_14D	control_14D	OK	726.571	465.042	-0.643743	-1.25751	0.03185	0.149941
CG7166	CG7166	CG7166	chr3L:21619999-21625647	opa RNAi_14D	control_14D	OK	0.170183	0.519736	1.6107	1.31928	0.0319	0.149998
r2d2	r2d2	r2d2	chr2L:7800146-7810703	opa RNAi_14D	control_14D	OK	170.733	106.62	-0.679259	-1.22863	0.0319	0.149998
CG13890	CG13890	CG13890	chr3L:851345-852673	opa RNAi_14D	control_14D	OK	25.2748	14.4059	-0.811038	-1.19839	0.03205	0.150614
CG6656	CG6656	CG6656	chr3R:21875292-21877788	opa RNAi_14D	control_14D	OK	1.77829	0.71853	-1.30737	-1.28775	0.0321	0.150759
cdi	cdi	cdi	chr3R:19044881-19094270	opa RNAi_14D	control_14D	OK	4.93608	2.74564	-0.846224	-1.26087	0.03215	0.150905
CG4610	CG4610	CG4610	chr2R:22492196-22494295	opa RNAi_14D	control_14D	OK	1.72337	3.61882	1.07029	1.2538	0.0322	0.15105
CG1888	CG1888	CG1888	chr2R:9541946-9548135	opa RNAi_14D	control_14D	OK	5.77837	11.37	0.976495	1.28992	0.03225	0.151105
ear	ear	ear	chr3R:15320755-15325279	opa RNAi_14D	control_14D	OK	5.16691	2.74375	-0.913149	-1.24878	0.03225	0.151105
amos	amos	amos	chr2L:18596135-18596921	opa RNAi_14D	control_14D	OK	4.60364	1.90874	-1.27015	-1.28015	0.0324	0.15127
CG34148	CG34148	CG34148	chr3R:21877869-21884454	opa RNAi_14D	control_14D	OK	74.5344	30.2235	-1.30224	-1.34097	0.03235	0.15127
CG6463	CG6463	CG6463	chr3L:10693183-10694108	opa RNAi_14D	control_14D	OK	233.744	147.481	-0.664403	-1.23308	0.0324	0.15127
CG6659	CG6659	CG6659	chrX:18653391-18657286	opa RNAi_14D	control_14D	OK	2.18687	1.06763	-1.03445	-1.26429	0.03235	0.15127
CR43470	CR43470	CR43470	chr3L:7250639-7263920	opa RNAi_14D	control_14D	OK	0.0480794	0.570213	3.56801	1.32551	0.03235	0.15127
Etl1	Etl1	Etl1	chr2L:9908829-9912608	opa RNAi_14D	control_14D	OK	4.8671	8.75358	0.84681	1.2561	0.0324	0.15127
CG33695	CG33695	CG33695	chr2L:11278020-11279982	opa RNAi_14D	control_14D	OK	38.6436	62.328	0.689651	1.21254	0.03245	0.151414
Snoo	Snoo	Snoo	chr2L:7891186-7986785	opa RNAi_14D	control_14D	OK	0.501609	0.205459	-1.28771	-1.25754	0.0325	0.151558
Synd	Synd	Synd	chr3R:20832798-20840118	opa RNAi_14D	control_14D	OK	8.50359	4.54274	-0.904509	-1.24785	0.0326	0.151935
CG42394	CG42394	CG42394	chr3R:10849824-10851788	opa RNAi_14D	control_14D	OK	1226.74	822.228	-0.577218	-1.21209	0.03265	0.151989
Syb	Syb	Syb	chr2R:10247813-10255495	opa RNAi_14D	control_14D	OK	748.682	509.847	-0.554288	-1.22405	0.03265	0.151989
CG8960	CG8960	CG8960	chr3L:2197012-2198089	opa RNAi_14D	control_14D	OK	1497.7	1034.46	-0.53387	-1.22696	0.0327	0.152132
CG1503	CG1503	CG1503	chrX:21093843-21116914	opa RNAi_14D	control_14D	OK	4.05003	7.96854	0.976383	1.2355	0.03275	0.152275
CG13484	CG13484	CG13484	chr3L:14051205-14053079	opa RNAi_14D	control_14D	OK	282.462	157.468	-0.843	-1.23638	0.0328	0.152328
iPLA2-VIA	iPLA2-VIA	iPLA2-VIA	chr3L:9860216-9864349	opa RNAi_14D	control_14D	OK	0.538851	1.20833	1.16505	1.23088	0.0328	0.152328
CG8931	CG8931	CG8931	chrX:15983771-15985405	opa RNAi_14D	control_14D	OK	59.9781	36.6831	-0.709322	-1.25372	0.0329	0.152614
Cp15	Cp15	Cp15	chr3L:8728480-8729066	opa RNAi_14D	control_14D	OK	0.843962	2.81591	1.73835	1.3455	0.0329	0.152614
CG3295	CG3295	CG3295	chr2R:21011969-21017446	opa RNAi_14D	control_14D	OK	15.9425	28.3293	0.829417	1.25398	0.033	0.152988
Fur2	Fur2	Fur2	chrX:16373085-16381782	opa RNAi_14D	control_14D	OK	0.499337	0.202456	-1.3024	-1.2174	0.03305	0.15313
CG42637	CG42637,Gyc76C	CG42637,Gyc76C	chr3L:19750942-19793569	opa RNAi_14D	control_14D	OK	1.1878	0.386186	-1.62092	-1.29708	0.0331	0.153272
abd-A	abd-A	abd-A	chr3R:16807213-16830049	opa RNAi_14D	control_14D	OK	1.04302	2.47174	1.24476	1.25036	0.0332	0.153645
sip2	sip2	sip2	chr2L:6960376-6964074	opa RNAi_14D	control_14D	OK	33.1336	55.5983	0.746744	1.25018	0.03325	0.153786
CG14204	CG14204	CG14204	chrX:19583616-19587057	opa RNAi_14D	control_14D	OK	1.61899	0.670723	-1.27131	-1.25505	0.0333	0.153837
Gr59f	Gr59f	Gr59f	chr2R:23542509-23543885	opa RNAi_14D	control_14D	OK	0.139354	0.731264	2.39163	1.5464	0.0333	0.153837
2020-09-05	2020-09-05	2020-09-05	chr2R:7960132-7961921	opa RNAi_14D	control_14D	OK	170.136	249.219	0.550727	1.21682	0.0334	0.15403
CG17019	CG17019	CG17019	chr2R:12930911-12934045	opa RNAi_14D	control_14D	OK	1.58396	3.13478	0.984822	1.20749	0.0334	0.15403
CG7712	CG7712	CG7712	chr2R:10894458-10897885	opa RNAi_14D	control_14D	OK	1603.53	1067.47	-0.58706	-1.2304	0.0334	0.15403
CG12608	CG12608	CG12608	chrX:15342856-15344625	opa RNAi_14D	control_14D	OK	22.8302	37.222	0.705211	1.20071	0.03345	0.15408
eIF3-S8	eIF3-S8	eIF3-S8	chr2R:17665677-17669275	opa RNAi_14D	control_14D	OK	4.68267	8.32152	0.829516	1.22986	0.03345	0.15408
cl	cl	cl	chr2L:5520134-5523898	opa RNAi_14D	control_14D	OK	713.041	459.349	-0.634393	-1.23797	0.0335	0.154221
CG1172	CG1172	CG1172	chr3R:5393921-5399510	opa RNAi_14D	control_14D	OK	53.5942	32.7654	-0.709904	-1.24322	0.03355	0.154271
CG4500	CG4500	CG4500	chr2L:14027000-14031539	opa RNAi_14D	control_14D	OK	5.09751	9.66521	0.923007	1.2275	0.03355	0.154271
CG7744	CG7744	CG7744	chr2R:19452503-19455527	opa RNAi_14D	control_14D	OK	3.05306	5.88294	0.946283	1.23195	0.03365	0.154641
Dbi	Dbi	Dbi	chr3L:7131862-7133463	opa RNAi_14D	control_14D	OK	1.8818	0.505949	-1.89504	-1.12505	0.03385	0.15547
CG1622	CG1622	CG1622	chrX:13294472-13302415	opa RNAi_14D	control_14D	OK	44.9894	72.7841	0.694039	1.24136	0.034	0.155797
CR45530	CR45530	CR45530	chrX:6279679-6280012	opa RNAi_14D	control_14D	OK	4.35217	1.42323	-1.61257	-1.25345	0.034	0.155797
mRpL38	mRpL38	mRpL38	chrX:14226288-14227949	opa RNAi_14D	control_14D	OK	2.76871	6.18437	1.15941	1.28448	0.03395	0.155797
ocn	ocn	ocn	chr3R:30037002-30037730	opa RNAi_14D	control_14D	OK	4.31485	1.58823	-1.44189	-1.30863	0.034	0.155797
crp	crp	crp	chr2L:16263555-16287730	opa RNAi_14D	control_14D	OK	11.5058	18.7461	0.70423	1.21566	0.03405	0.155936
AstC	AstC	AstC	chr2L:11076164-11081399	opa RNAi_14D	control_14D	OK	6.70996	3.38667	-0.986437	-1.23216	0.0341	0.156075
CG4552	CG4552	CG4552	chr2L:1129315-1134098	opa RNAi_14D	control_14D	OK	0.490391	1.15926	1.2412	1.25017	0.03415	0.156213
kcc	kcc	kcc	chr2R:23907653-23925066	opa RNAi_14D	control_14D	OK	1.1041	2.22109	1.00839	1.24453	0.0343	0.156808
CG1637	CG1637	CG1637	chrX:10869283-10877893	opa RNAi_14D	control_14D	OK	63.6787	98.028	0.622383	1.22865	0.0345	0.157632
CG13295	CG13295	CG13295	chr3L:6072138-6075245	opa RNAi_14D	control_14D	OK	3.71027	7.47524	1.01059	1.22661	0.03455	0.157678
htl	htl	htl	chr3R:18045215-18052984	opa RNAi_14D	control_14D	OK	3.35973	6.47117	0.945681	1.24225	0.03455	0.157678
CG10214	CG10214	CG10214	chr3R:23763856-23767488	opa RNAi_14D	control_14D	OK	463.22	315.694	-0.553168	-1.20925	0.0346	0.157815
CG32069	CG32069	CG32069	chr3L:11061570-11062614	opa RNAi_14D	control_14D	OK	613.764	367.721	-0.739073	-1.21895	0.03465	0.157952
CG5210	CG5210	CG5210	chr2R:16673234-16732916	opa RNAi_14D	control_14D	OK	241.246	351.091	0.541341	1.21462	0.0347	0.158089
CG14544	CG14544	CG14544	chr3R:26059495-26063011	opa RNAi_14D	control_14D	OK	5.52687	10.7807	0.963916	1.23454	0.0348	0.158453
cu	cu	cu	chr3R:11197591-11208633	opa RNAi_14D	control_14D	OK	1.90481	0.878282	-1.11689	-1.14949	0.03495	0.158953
GstE3	GstE3	GstE3	chr2R:18400712-18401467	opa RNAi_14D	control_14D	OK	2.00427	0.281068	-2.83409	-1.75684	0.03495	0.158953
fand	fand	fand	chr2R:13593643-13596557	opa RNAi_14D	control_14D	OK	8.91624	14.9158	0.742332	1.18756	0.035	0.158998
Hmt-1	Hmt-1	Hmt-1	chr3R:15853867-15857470	opa RNAi_14D	control_14D	OK	0.43259	1.03229	1.25477	1.25213	0.035	0.158998
CG2211	CG2211	CG2211	chr3L:1333238-1339415	opa RNAi_14D	control_14D	OK	53.508	32.8442	-0.704115	-1.20347	0.0351	0.15936
Aats-arg	Aats-arg	Aats-arg	chrX:15841768-15844145	opa RNAi_14D	control_14D	OK	9.90554	5.55368	-0.834792	-1.20557	0.03525	0.159401
bsk	bsk	bsk	chr2L:10247501-10250501	opa RNAi_14D	control_14D	OK	12.7737	22.4268	0.812043	1.21576	0.03525	0.159401
CG17359	CG17359	CG17359	chr3L:13997190-13999251	opa RNAi_14D	control_14D	OK	28.4764	13.7828	-1.0469	-1.24293	0.0352	0.159401
CG8188	CG8188	CG8188	chrX:17698916-17703024	opa RNAi_14D	control_14D	OK	96.432	62.1148	-0.634573	-1.23144	0.03525	0.159401
CTPsyn	CTPsyn	CTPsyn	chr3L:15097913-15113003	opa RNAi_14D	control_14D	OK	110.512	164.488	0.573779	1.21599	0.0352	0.159401
RhoGEF4	RhoGEF4	RhoGEF4	chr3L:7320067-7323411	opa RNAi_14D	control_14D	OK	38.553	61.268	0.668292	1.23752	0.03515	0.159401
Rhp	Rhp	Rhp	chrX:15788896-15793632	opa RNAi_14D	control_14D	OK	1.47979	0.65848	-1.16818	-1.22473	0.03525	0.159401
CG15362	CG15362	CG15362	chr2L:1981175-1982099	opa RNAi_14D	control_14D	OK	1.76569	4.09723	1.21442	1.24491	0.0353	0.159536
Tsp96F	Tsp96F	Tsp96F	chr3R:25872899-25881427	opa RNAi_14D	control_14D	OK	164.2	112.518	-0.545298	-1.21185	0.03545	0.160122
wmd	wmd	wmd	chr2R:23544023-23548151	opa RNAi_14D	control_14D	OK	36.9361	62.9607	0.769419	1.25947	0.03555	0.160482
Hcf	Hcf	Hcf	chr4:359937-375554	opa RNAi_14D	control_14D	OK	28.2984	42.7727	0.595974	1.21183	0.0356	0.160616
CR45435	CR45435	CR45435	chr3L:18583436-18584235	opa RNAi_14D	control_14D	OK	3.38718	1.41431	-1.25999	-1.23859	0.03565	0.16075
CG5676	CG5676	CG5676	chr2L:10251842-10255891	opa RNAi_14D	control_14D	OK	3100.55	2194.54	-0.498608	-1.19144	0.03575	0.161109
Stam	Stam	Stam	chr2L:10858535-10862006	opa RNAi_14D	control_14D	OK	2.40812	4.58687	0.929601	1.21093	0.0358	0.161243
glo	glo	glo	chr3R:11815205-11819339	opa RNAi_14D	control_14D	OK	161.651	236.518	0.549064	1.2212	0.03585	0.161376
CG30001	CG30001	CG30001	chr2R:9820562-9822955	opa RNAi_14D	control_14D	OK	96.7492	62.0216	-0.641479	-1.22052	0.036	0.161775
CG5500	CG5500	CG5500	chr3R:26876629-26881171	opa RNAi_14D	control_14D	OK	14.0035	26.4895	0.91963	1.22658	0.036	0.161775
Taf7	Taf7	Taf7	chr3R:7903029-7911779	opa RNAi_14D	control_14D	OK	62.1959	34.8224	-0.836804	-1.24264	0.036	0.161775
Surf4	Surf4	Surf4	chr3R:15343652-15346176	opa RNAi_14D	control_14D	OK	42.2941	25.1485	-0.749982	-1.21201	0.03605	0.161908
Ipk1	Ipk1	Ipk1	chr2R:20870790-20879145	opa RNAi_14D	control_14D	OK	1.68332	3.39594	1.0125	1.2158	0.0363	0.162938
CG11030	CG11030	CG11030	chr2L:5724655-5762420	opa RNAi_14D	control_14D	OK	60.08	93.4118	0.636721	1.21575	0.03635	0.16307
shrb	shrb	shrb	chr2R:9142145-9143914	opa RNAi_14D	control_14D	OK	139.404	90.5438	-0.622586	-1.23848	0.0364	0.163202
A16	A16	A16	chr2L:13019574-13021312	opa RNAi_14D	control_14D	OK	13.486	23.9479	0.828435	1.22432	0.03645	0.163333
CG14104	CG14104	CG14104	chr3L:19805180-19807199	opa RNAi_14D	control_14D	OK	286.578	130.82	-1.13135	-1.27066	0.03655	0.163689
CG33052	CG33052	CG33052	chr3L:17427304-17428836	opa RNAi_14D	control_14D	OK	5.63458	10.8581	0.946384	1.23883	0.03665	0.163858
ems	ems	ems	chr3R:13901852-13904620	opa RNAi_14D	control_14D	OK	2.51215	1.23048	-1.0297	-1.2173	0.03665	0.163858
gammaTub23C	gammaTub23C	gammaTub23C	chr2L:2972890-2974858	opa RNAi_14D	control_14D	OK	61.5096	93.8749	0.609928	1.21321	0.03665	0.163858
mRpL41	mRpL41	mRpL41	chr2R:15216206-15217617	opa RNAi_14D	control_14D	OK	352.088	168.92	-1.05959	-1.2417	0.03675	0.164212
CG7694	CG7694	CG7694	chr3R:18573090-18590726	opa RNAi_14D	control_14D	OK	147.262	94.8445	-0.634747	-1.19782	0.0368	0.164343
CG33713	CG33713	CG33713	chrX:21317935-21319296	opa RNAi_14D	control_14D	OK	58.1139	33.6002	-0.790413	-1.21105	0.0369	0.164696
Ptpa	Ptpa	Ptpa	chr2L:3377001-3378590	opa RNAi_14D	control_14D	OK	69.7696	44.2118	-0.658167	-1.20016	0.03705	0.165273
tos	tos	tos	chr2L:18677220-18683715	opa RNAi_14D	control_14D	OK	2.84077	7.52452	1.40532	1.27591	0.0371	0.165402
CG12004	CG12004	CG12004	chr3L:1569180-1576330	opa RNAi_14D	control_14D	OK	11.4522	19.6509	0.778978	1.22872	0.03715	0.165532
Dscam2	Dscam2	Dscam2	chr3L:7159198-7189931	opa RNAi_14D	control_14D	OK	0.00979534	1.34723	7.10368	1.26444	0.03725	0.165791
Rab1	Rab1	Rab1	chr3R:21266028-21269060	opa RNAi_14D	control_14D	OK	193.434	132.394	-0.546999	-1.17944	0.03725	0.165791
CG3621	CG3621	CG3621	chrX:2172525-2180998	opa RNAi_14D	control_14D	OK	464.599	305.34	-0.605573	-1.18487	0.0374	0.166271
CG4042	CG4042	CG4042	chr3L:20770142-20771507	opa RNAi_14D	control_14D	OK	50.4585	29.8877	-0.755546	-1.19951	0.0374	0.166271
alpha-Est5	alpha-Est5	alpha-Est5	chr3R:7533495-7536390	opa RNAi_14D	control_14D	OK	7.69923	4.09042	-0.912465	-1.20736	0.03745	0.166307
mRpL22	mRpL22	mRpL22	chrX:16783932-16785092	opa RNAi_14D	control_14D	OK	50.7042	30.3266	-0.741521	-1.19689	0.03745	0.166307
IntS14	IntS14	IntS14	chr2L:1164442-1166425	opa RNAi_14D	control_14D	OK	10.13	17.6136	0.798062	1.17528	0.03755	0.166657
CG5665	CG5665	CG5665	chr3L:20358511-20359820	opa RNAi_14D	control_14D	OK	0.174921	0.564338	1.68985	1.08144	0.0376	0.166785
Vang	Vang	Vang	chr2R:9103237-9106796	opa RNAi_14D	control_14D	OK	7.01836	4.0395	-0.796955	-1.18228	0.03765	0.166914
CG13807	CG13807	CG13807	chr3L:2262918-2265857	opa RNAi_14D	control_14D	OK	803.4	543.946	-0.562654	-1.20525	0.0379	0.167492
CG17018	CG17018	CG17018	chr2L:22308754-22368796	opa RNAi_14D	control_14D	OK	31.4839	19.5241	-0.68936	-1.23925	0.0379	0.167492
CG42445	CG42445	CG42445	chr3L:8154680-8158900	opa RNAi_14D	control_14D	OK	397.034	271.094	-0.550472	-1.18391	0.0379	0.167492
CG7718	CG7718	CG7718	chr3R:18744062-18746041	opa RNAi_14D	control_14D	OK	0.716797	1.62745	1.18297	1.2307	0.0379	0.167492
IM14	IM14	IM14	chr2R:20870391-20870678	opa RNAi_14D	control_14D	OK	30.1462	10.1872	-1.56522	-1.28587	0.03795	0.167492
Iswi	Iswi	Iswi	chr2R:12636670-12640628	opa RNAi_14D	control_14D	OK	23.5402	36.4749	0.631777	1.19837	0.03795	0.167492
Sec16	Sec16	Sec16	chrX:12596046-12609910	opa RNAi_14D	control_14D	OK	0.743076	0.379564	-0.969165	-1.18381	0.03795	0.167492
Vps16A	Vps16A	Vps16A	chr3R:9267018-9270224	opa RNAi_14D	control_14D	OK	3.67213	6.73369	0.874779	1.21732	0.03785	0.167492
asf1	asf1	asf1	chr3L:19618893-19620398	opa RNAi_14D	control_14D	OK	269.375	393.375	0.546289	1.21454	0.03805	0.16784
drl	drl	drl	chr2L:19190341-19208621	opa RNAi_14D	control_14D	OK	1.23606	2.46574	0.996272	1.16832	0.03815	0.168187
CG43273	CG43273	CG43273	chr3R:24830300-24830973	opa RNAi_14D	control_14D	OK	83.9733	50.5783	-0.731413	-1.16747	0.0382	0.168314
Der-1	Der-1	Der-1	chr2L:1973956-1975413	opa RNAi_14D	control_14D	OK	30.2463	51.8626	0.777936	1.20468	0.0383	0.168661
btd	btd	btd	chrX:9694185-9697558	opa RNAi_14D	control_14D	OK	1.65091	0.813646	-1.02079	-1.18116	0.03855	0.169103
CG12535	CG12535	CG12535	chrX:3373158-3573622	opa RNAi_14D	control_14D	OK	12.3417	2.71534	-2.18434	-0.422931	0.0385	0.169103
CG17806	CG17806	CG17806	chr3R:17801541-17805249	opa RNAi_14D	control_14D	OK	18.3667	7.32527	-1.32614	-1.3038	0.03855	0.169103
CR44718	CR44718	CR44718	chr3L:11236499-11237620	opa RNAi_14D	control_14D	OK	0.291493	0.945038	1.69691	1.3076	0.03845	0.169103
NKAIN	NKAIN	NKAIN	chr2R:24876690-24888615	opa RNAi_14D	control_14D	OK	1.54805	3.42516	1.14572	1.2882	0.03855	0.169103
Pli	Pli	Pli	chr3R:23860161-23890052	opa RNAi_14D	control_14D	OK	13.784	22.7422	0.722382	1.20235	0.0385	0.169103
Tgs1	Tgs1	Tgs1	chr3R:18255529-18257677	opa RNAi_14D	control_14D	OK	4.4857	8.45318	0.914162	1.20971	0.03845	0.169103
emb	emb	emb	chr2L:8403446-8408853	opa RNAi_14D	control_14D	OK	27.5492	41.1658	0.579436	1.1718	0.0387	0.169666
CG16979	CG16979	CG16979	chr3L:15576569-15578674	opa RNAi_14D	control_14D	OK	3.35649	6.1219	0.867027	1.15715	0.0389	0.170449
CG10590	CG10590	CG10590	chr3L:5601095-5603979	opa RNAi_14D	control_14D	OK	7.89241	13.3073	0.753683	1.167	0.03905	0.170917
Vps29	Vps29	Vps29	chr2L:1150765-1158262	opa RNAi_14D	control_14D	OK	213.437	134.936	-0.661538	-1.19572	0.03905	0.170917
CG31122	CG31122	CG31122	chr3R:18406064-18412874	opa RNAi_14D	control_14D	OK	0.726407	1.49682	1.04305	1.1999	0.0391	0.171041
fal	fal	fal	chr3L:19294766-19337609	opa RNAi_14D	control_14D	OK	14.7341	8.04118	-0.873677	-1.17911	0.03915	0.171165
CG6610	CG6610	CG6610	chr3L:6075535-6076258	opa RNAi_14D	control_14D	OK	353.411	225.061	-0.651033	-1.19693	0.03925	0.171507
CadN	CadN	CadN	chr2L:17647052-17778340	opa RNAi_14D	control_14D	OK	0.535056	1.14386	1.09615	1.36688	0.0393	0.171631
CG8712	CG8712	CG8712	chr2R:8091695-8098484	opa RNAi_14D	control_14D	OK	9.48356	16.8585	0.829972	1.20281	0.0395	0.172409
CG8258	CG8258	CG8258	chr2R:8904843-8906990	opa RNAi_14D	control_14D	OK	6.20671	10.7894	0.797711	1.13341	0.03955	0.172532
AGO3	AGO3	AGO3	chr3L:23554592-23689640	opa RNAi_14D	control_14D	OK	358.917	253.806	-0.499926	-1.1844	0.03965	0.172683
CG16734	CG16734	CG16734	chr3R:9255051-9257716	opa RNAi_14D	control_14D	OK	27.8521	16.3685	-0.766867	-1.18211	0.03965	0.172683
Git	Git	Git	chr2R:10641817-10645427	opa RNAi_14D	control_14D	OK	8.00993	13.9569	0.801118	1.19601	0.03965	0.172683
CG30424	CG30424	CG30424	chr2R:24965274-24967298	opa RNAi_14D	control_14D	OK	3.14212	1.09681	-1.51842	-1.24218	0.0397	0.17271
Uvrag	Uvrag	Uvrag	chr2L:13286776-13289556	opa RNAi_14D	control_14D	OK	0.46908	1.18621	1.33845	1.22611	0.0397	0.17271
AstA	AstA	AstA	chr3R:24760529-24765071	opa RNAi_14D	control_14D	OK	0.868815	0.32173	-1.4332	-1.146	0.03975	0.172738
or	or	or	chr2R:23967938-23970073	opa RNAi_14D	control_14D	OK	317.59	191.239	-0.731791	-1.20279	0.03975	0.172738
blw	blw	blw	chr2R:22799098-22802180	opa RNAi_14D	control_14D	OK	24.4664	39.6714	0.697296	1.1773	0.03985	0.172982
CG1815	CG1815	CG1815	chr3R:31669464-31677971	opa RNAi_14D	control_14D	OK	1.3184	0.674928	-0.965984	-1.1983	0.03985	0.172982
CG5316	CG5316	CG5316	chr3R:19403454-19406294	opa RNAi_14D	control_14D	OK	70.7991	47.3675	-0.579833	-1.16998	0.0399	0.173104
CG31441	CG31441	CG31441	chr3R:11236285-11237624	opa RNAi_14D	control_14D	OK	38.951	22.8328	-0.770556	-1.20877	0.04	0.173348
Mical	Mical	Mical	chr3R:10001553-10042895	opa RNAi_14D	control_14D	OK	0.552906	0.278991	-0.986818	-1.07205	0.04	0.173348
nkd	nkd	nkd	chr3L:19003740-19045449	opa RNAi_14D	control_14D	OK	10.4005	16.679	0.681384	1.17535	0.04005	0.173375
RpL38	RpL38	RpL38	chr2R:4515387-4516458	opa RNAi_14D	control_14D	OK	10060.9	7127.91	-0.497201	-1.17553	0.04005	0.173375
CG40042	CG40042	CG40042	chr2L:23312464-23313578	opa RNAi_14D	control_14D	OK	250.663	166.588	-0.589465	-1.16704	0.0401	0.173496
CG8204	CG8204	CG8204	chr2R:15566270-15573991	opa RNAi_14D	control_14D	OK	130.428	62.2006	-1.06825	-1.22026	0.04015	0.173523
ken	ken	ken	chr2R:23870272-23877442	opa RNAi_14D	control_14D	OK	0.910523	2.01266	1.14433	1.13715	0.04015	0.173523
CG14830	CG14830	CG14830	chr3L:7250639-7263920	opa RNAi_14D	control_14D	OK	0.101454	0.936633	3.20666	1.74915	0.04025	0.173575
CG8335	CG8335	CG8335	chr2R:6200852-6201956	opa RNAi_14D	control_14D	OK	6.26854	11.3614	0.857946	1.1398	0.04025	0.173575
Tango8	Tango8	Tango8	chr2R:18277438-18357296	opa RNAi_14D	control_14D	OK	6.33926	0	#NAME?	#NAME?	0.0402	0.173575
Vps35	Vps35	Vps35	chr2R:22185971-22203045	opa RNAi_14D	control_14D	OK	8.41347	14.9699	0.831295	1.19132	0.04025	0.173575
bigmax	bigmax	bigmax	chr3R:27283779-27288526	opa RNAi_14D	control_14D	OK	119.521	184.953	0.62989	1.17131	0.04035	0.173912
Dpck	Dpck	Dpck	chr3R:7082181-7086083	opa RNAi_14D	control_14D	OK	212.087	95.8209	-1.14624	-1.22911	0.0404	0.174032
mi	mi	mi	chr2R:23523855-23538499	opa RNAi_14D	control_14D	OK	6.96915	12.6927	0.864942	1.18275	0.04045	0.174153
ari-2	ari-2	ari-2	chr2R:22212834-22217264	opa RNAi_14D	control_14D	OK	2.19094	4.09068	0.90079	1.16248	0.04055	0.174394
Rpb11	Rpb11	Rpb11	chr2L:17384699-17410406	opa RNAi_14D	control_14D	OK	2287.07	1604.46	-0.511406	-1.17341	0.04055	0.174394
Klp64D	Klp64D	Klp64D	chr3L:5356863-5359392	opa RNAi_14D	control_14D	OK	2.49799	4.54106	0.862265	1.1569	0.0407	0.174944
CG5807	CG5807	CG5807	chr3R:24805444-24814012	opa RNAi_14D	control_14D	OK	2.4708	1.15632	-1.09544	-1.18033	0.0408	0.175278
CG11671	CG11671	CG11671	chr3R:8287875-8288613	opa RNAi_14D	control_14D	OK	1.789	0.275242	-2.70038	-1.59648	0.0409	0.175422
MFS18	MFS18	MFS18	chr2L:4444731-4448635	opa RNAi_14D	control_14D	OK	3.28339	7.2969	1.1521	1.20745	0.0409	0.175422
yellow-e2	yellow-e2	yellow-e2	chr3R:13405108-13406998	opa RNAi_14D	control_14D	OK	0.797474	1.83011	1.19842	1.19262	0.0409	0.175422
Ir31a	Ir31a	Ir31a	chr2L:10405564-10408197	opa RNAi_14D	control_14D	OK	1.28156	2.71457	1.08282	1.2313	0.041	0.175756
Asator	Asator	Asator	chr4:467496-488994	opa RNAi_14D	control_14D	OK	23.5615	12.7155	-0.889838	-1.13619	0.04115	0.176303
CycY	CycY	CycY	chr2L:11810091-11813780	opa RNAi_14D	control_14D	OK	15.3516	24.9237	0.69913	1.18469	0.0412	0.176422
CG6020	CG6020	CG6020	chr3L:20484292-20497084	opa RNAi_14D	control_14D	OK	147.161	219.182	0.57474	1.18515	0.04125	0.176445
ltl	ltl	ltl	chr3L:7518996-7528013	opa RNAi_14D	control_14D	OK	1.57369	3.07796	0.967826	1.21748	0.04125	0.176445
CG15535	CG15535	CG15535	chr3R:30423031-30423929	opa RNAi_14D	control_14D	OK	48.8421	79.9388	0.710769	1.17138	0.0413	0.176468
CG30118	CG30118	CG30118	chr2R:18426420-18440475	opa RNAi_14D	control_14D	OK	5.0254	9.54423	0.925392	1.16869	0.0413	0.176468
Lapsyn	Lapsyn	Lapsyn	chr2R:21193570-21199431	opa RNAi_14D	control_14D	OK	9.59696	16.7938	0.807282	1.14001	0.04145	0.176917
RnpS1	RnpS1	RnpS1	chr3R:9552033-9555408	opa RNAi_14D	control_14D	OK	68.0611	105.837	0.636946	1.17534	0.04145	0.176917
CG13887	CG13887	CG13887	chr3L:837860-839931	opa RNAi_14D	control_14D	OK	304.101	207.524	-0.551273	-1.1909	0.0415	0.177035
CG10674	CG10674	CG10674	chr3L:5133870-5136292	opa RNAi_14D	control_14D	OK	174.386	103.468	-0.753096	-1.18134	0.0416	0.177366
Sec24CD	Sec24CD	Sec24CD	chr2L:2231105-2237022	opa RNAi_14D	control_14D	OK	1.22571	2.46249	1.0065	1.20561	0.04165	0.177484
CG42335	CG42335	CG42335	chr3R:21758763-21769301	opa RNAi_14D	control_14D	OK	0.591013	0.169149	-1.8049	-1.29018	0.04175	0.177814
Zip48C	Zip48C	Zip48C	chr2R:11895996-11903918	opa RNAi_14D	control_14D	OK	11.6175	20.1052	0.791262	1.18902	0.0418	0.177931
Noa36	Noa36	Noa36	chr3R:28598058-28599288	opa RNAi_14D	control_14D	OK	229.996	156.986	-0.550971	-1.15304	0.04185	0.178048
RpII18	RpII18	RpII18	chr3R:5371794-5372397	opa RNAi_14D	control_14D	OK	3828.02	2703.56	-0.501739	-1.18222	0.04195	0.178378
CG32196	CG32196	CG32196	chr3L:18459463-18461024	opa RNAi_14D	control_14D	OK	14.6082	7.63045	-0.936943	-1.24239	0.042	0.178494
Ranbp16	Ranbp16	Ranbp16	chrX:15925104-15933867	opa RNAi_14D	control_14D	OK	17.3528	27.0129	0.638482	1.19314	0.0421	0.178823
CG11396	CG11396	CG11396	chr3L:20786339-20788137	opa RNAi_14D	control_14D	OK	12.1779	20.5745	0.756598	1.12091	0.0422	0.179056
Tdrd3	Tdrd3	Tdrd3	chr3L:14786790-14789665	opa RNAi_14D	control_14D	OK	3.04988	5.57878	0.871198	1.18776	0.0422	0.179056
bbg	bbg	bbg	chr3L:14412827-14536276	opa RNAi_14D	control_14D	OK	0.467456	1.07216	1.19762	1.1563	0.0423	0.179288
Orc5	Orc5	Orc5	chr2L:13829836-13833105	opa RNAi_14D	control_14D	OK	14.2094	26.307	0.888602	1.14636	0.0423	0.179288
CG7054	CG7054	CG7054	chr3R:22464984-22465938	opa RNAi_14D	control_14D	OK	176.962	115.931	-0.610166	-1.17213	0.04235	0.179403
CG6852	CG6852	CG6852	chr3L:18869229-18872553	opa RNAi_14D	control_14D	OK	193.245	91.8078	-1.07375	-1.20345	0.04245	0.179731
CR44964	CR44964	CR44964	chrX:6744878-6755752	opa RNAi_14D	control_14D	OK	0.995712	0.318741	-1.64334	-1.26249	0.04265	0.180288
Nup93-1	Nup93-1	Nup93-1	chrX:13822825-13825910	opa RNAi_14D	control_14D	OK	14.9361	24.1394	0.692589	1.16864	0.04265	0.180288
Rpn11	Rpn11	Rpn11	chr2L:5058403-5059790	opa RNAi_14D	control_14D	OK	31.5114	51.0098	0.694902	1.15547	0.04265	0.180288
CG3587	CG3587	CG3587	chrX:1940306-1941536	opa RNAi_14D	control_14D	OK	59.3192	37.2144	-0.672638	-1.15735	0.04275	0.180614
Rab10	Rab10	Rab10	chrX:20251337-20254691	opa RNAi_14D	control_14D	OK	8.76285	4.98441	-0.813978	-1.17717	0.0428	0.180729
CG8300	CG8300	CG8300	chrX:7104884-7110321	opa RNAi_14D	control_14D	OK	18.5924	9.60227	-0.953263	-1.18067	0.04285	0.180843
CG13624	CG13624	CG13624	chr3R:24557367-24582864	opa RNAi_14D	control_14D	OK	0.924516	1.91347	1.04942	1.22686	0.0429	0.180958
CG32649	CG32649	CG32649	chrX:12898767-12901114	opa RNAi_14D	control_14D	OK	1.14789	0.397567	-1.52972	-1.16932	0.043	0.181283
CG40298	CG40298	CG40298	chr3L:23726828-23727989	opa RNAi_14D	control_14D	OK	5.49887	2.45541	-1.16317	-1.20084	0.0431	0.181415
CG9153	CG9153	CG9153	chr3L:1313695-1318330	opa RNAi_14D	control_14D	OK	2.12254	1.07373	-0.983164	-1.18072	0.0431	0.181415
Hrb98DE	Hrb98DE	Hrb98DE	chr3R:28599833-28605777	opa RNAi_14D	control_14D	OK	316.173	444.453	0.491315	1.14361	0.0431	0.181415
CG31278	CG31278	CG31278	chr3R:10706973-10708340	opa RNAi_14D	control_14D	OK	33.4895	19.084	-0.81135	-1.19502	0.04315	0.181528
GAPsec	GAPsec	GAPsec	chr3L:8619887-8623901	opa RNAi_14D	control_14D	OK	31.8623	19.1987	-0.730838	-1.16041	0.0433	0.182063
CG9306	CG9306	CG9306	chr2L:13369203-13371110	opa RNAi_14D	control_14D	OK	1151.37	757.378	-0.604262	-1.16362	0.04335	0.182079
IP3K1	IP3K1	IP3K1	chr2L:9782383-9788499	opa RNAi_14D	control_14D	OK	2.98468	1.38543	-1.10724	-1.19651	0.04335	0.182079
gpp	gpp	gpp	chr3R:6406854-6449274	opa RNAi_14D	control_14D	OK	7.12698	4.37563	-0.703801	-1.16833	0.0434	0.182096
MAPk-Ak2	MAPk-Ak2	MAPk-Ak2	chrX:5759907-5764203	opa RNAi_14D	control_14D	OK	61.8438	40.1299	-0.623949	-1.15912	0.0434	0.182096
mre11	mre11	mre11	chr2L:11282089-11285706	opa RNAi_14D	control_14D	OK	17.9012	28.4392	0.667822	1.11814	0.0436	0.182838
CG1416	CG1416	CG1416	chr2L:21758009-21761000	opa RNAi_14D	control_14D	OK	237.693	162.647	-0.547354	-1.16556	0.0437	0.18316
baz	baz	baz	chrX:17160005-17200705	opa RNAi_14D	control_14D	OK	55.5108	78.8977	0.507214	1.1705	0.0439	0.183901
Arpc2	Arpc2	Arpc2	chr2L:20417056-20423027	opa RNAi_14D	control_14D	OK	382.96	270.844	-0.499733	-1.16658	0.044	0.184125
gsb	gsb	gsb	chr2R:25061963-25064643	opa RNAi_14D	control_14D	OK	0.621161	1.73668	1.48329	1.25932	0.044	0.184125
CG10623	CG10623	CG10623	chr2L:18955480-18957311	opa RNAi_14D	control_14D	OK	2.40241	1.09492	-1.13365	-1.17088	0.0441	0.184446
CG7441	CG7441	CG7441	chr3L:17849726-17852453	opa RNAi_14D	control_14D	OK	0.287581	0.718967	1.32196	1.16446	0.04415	0.184557
CG17600	CG17600	CG17600	chrX:22515196-22542024	opa RNAi_14D	control_14D	OK	17.2166	6.19715	-1.47412	-1.25865	0.0442	0.184669
CG10671	CG10671	CG10671	chr3L:5141952-5146063	opa RNAi_14D	control_14D	OK	1.14618	2.35962	1.04172	1.16471	0.04425	0.184682
Cyt-c-p	Cyt-c-p	Cyt-c-p	chr2L:16719931-16722644	opa RNAi_14D	control_14D	OK	1864.29	1333.23	-0.483701	-1.15252	0.04425	0.184682
Fmo-2	Fmo-2	Fmo-2	chr2R:6642417-6645098	opa RNAi_14D	control_14D	OK	0.596901	1.38978	1.21929	1.19534	0.0443	0.184794
CG1746	CG1746	CG1746	chr3R:31216144-31219630	opa RNAi_14D	control_14D	OK	3570.92	2518.76	-0.503583	-1.14668	0.0444	0.185016
CR45053	CR45053	CR45053	chr3R:9631640-9637611	opa RNAi_14D	control_14D	OK	75.5778	43.2534	-0.805148	-1.19877	0.0444	0.185016
Gbp	Gbp	Gbp	chr2R:17136450-17136903	opa RNAi_14D	control_14D	OK	1.76214	0.24989	-2.81796	-1.61045	0.04445	0.185126
CG1662	CG1662	CG1662	chrX:13387562-13389332	opa RNAi_14D	control_14D	OK	10.0754	5.53488	-0.864216	-1.16817	0.04455	0.18525
CG9471	CG9471	CG9471	chr3R:9770531-9771542	opa RNAi_14D	control_14D	OK	486.494	338.774	-0.522102	-1.14032	0.04455	0.18525
Pdk	Pdk	Pdk	chr2R:9426438-9434638	opa RNAi_14D	control_14D	OK	24.0105	13.9883	-0.779443	-1.16279	0.04455	0.18525
CR44591	CR44591	CR44591	chr2L:12079603-12080568	opa RNAi_14D	control_14D	OK	0.272887	0.90802	1.73442	1.21086	0.0446	0.185361
Arc2	Arc2	Arc2	chr2R:14361923-14362825	opa RNAi_14D	control_14D	OK	1.06169	0.171695	-2.62844	-1.57288	0.04465	0.185471
CG7601	CG7601	CG7601	chr3R:29725829-29736745	opa RNAi_14D	control_14D	OK	12.2617	6.44793	-0.927246	-1.16665	0.04475	0.185789
CR32205	CR32205	CR32205	chr3L:19422837-19424183	opa RNAi_14D	control_14D	OK	1.02032	2.35801	1.20854	1.122	0.0448	0.185899
CG42497	CG42497	CG42497	chr2R:21688772-21691139	opa RNAi_14D	control_14D	OK	410.088	266.612	-0.621194	-1.14063	0.04485	0.185911
MED28	MED28	MED28	chr3R:25477002-25477745	opa RNAi_14D	control_14D	OK	16.9524	29.2029	0.784626	1.11929	0.04485	0.185911
Dpit47	Dpit47	Dpit47	chr2R:6660644-6662118	opa RNAi_14D	control_14D	OK	111.026	73.3072	-0.598874	-1.15634	0.045	0.186338
Ime4	Ime4	Ime4	chr3R:24032156-24034257	opa RNAi_14D	control_14D	OK	8.03958	13.8024	0.779723	1.15638	0.045	0.186338
CG3501	CG3501	CG3501	chr2R:22874577-22882690	opa RNAi_14D	control_14D	OK	281.742	187.275	-0.589216	-1.13573	0.04505	0.18635
dgt1	dgt1	dgt1	chr3R:29841656-29857491	opa RNAi_14D	control_14D	OK	17.6593	10.2255	-0.788253	-1.17768	0.04505	0.18635
Kap-alpha1	Kap-alpha1	Kap-alpha1	chr3L:19807231-19810398	opa RNAi_14D	control_14D	OK	9.65085	5.55786	-0.796128	-1.11244	0.0451	0.186459
sna	sna	sna	chr2L:15476592-15478260	opa RNAi_14D	control_14D	OK	13.2752	22.104	0.735571	1.14619	0.04515	0.186568
Tal	Tal	Tal	chr2R:23940409-23942114	opa RNAi_14D	control_14D	OK	87.1419	55.3339	-0.655202	-1.14746	0.0452	0.186677
Bmcp	Bmcp	Bmcp	chr3L:11720933-11728118	opa RNAi_14D	control_14D	OK	9.76738	5.44826	-0.842176	-1.14647	0.04525	0.186689
CG1529	CG1529	CG1529	chrX:21028651-21031950	opa RNAi_14D	control_14D	OK	6.73132	3.54546	-0.924917	-1.17846	0.04525	0.186689
Gas41	Gas41	Gas41	chr2L:6949309-6950207	opa RNAi_14D	control_14D	OK	330.05	225.393	-0.550246	-1.13983	0.04535	0.187004
Myo31DF	Myo31DF	Myo31DF	chr2L:10491813-10507015	opa RNAi_14D	control_14D	OK	0.849152	0.38825	-1.12904	-1.12271	0.0454	0.187112
CG3505	CG3505	CG3505	chr3R:14657446-14659228	opa RNAi_14D	control_14D	OK	0.933028	2.16412	1.21379	1.19693	0.04545	0.187123
Pol32	Pol32	Pol32	chr2L:15254818-15256304	opa RNAi_14D	control_14D	OK	9.1151	15.9434	0.806629	1.12819	0.04545	0.187123
UbcD4	UbcD4	UbcD4	chr3L:9698335-9700481	opa RNAi_14D	control_14D	OK	442.091	304.642	-0.537227	-1.15597	0.0455	0.187232
lok	lok	lok	chr2L:20061421-20065679	opa RNAi_14D	control_14D	OK	20.3924	37.7279	0.887597	1.22213	0.0456	0.187546
AP-2alpha	AP-2alpha	AP-2alpha	chr2L:408029-414777	opa RNAi_14D	control_14D	OK	0.962619	1.8264	0.923966	1.14453	0.04575	0.18787
CG2246	CG2246	CG2246	chr3R:30592970-30601489	opa RNAi_14D	control_14D	OK	15.3054	26.8065	0.808541	1.19825	0.04575	0.18787
CG9646	CG9646	CG9646	chr2R:17048874-17053855	opa RNAi_14D	control_14D	OK	9.5552	5.36902	-0.831628	-1.18157	0.04575	0.18787
CG3238	CG3238	CG3238	chr2L:3467341-3470004	opa RNAi_14D	control_14D	OK	60.4031	89.8725	0.573258	1.1505	0.0458	0.18788
Pomp	Pomp	Pomp	chr2L:20787655-20797042	opa RNAi_14D	control_14D	OK	2011.28	1427.41	-0.494716	-1.15094	0.0458	0.18788
Prosalpha2	Prosalpha2	Prosalpha2	chr3R:12431320-12433822	opa RNAi_14D	control_14D	OK	1220.11	797.784	-0.612946	-1.1515	0.0459	0.188095
Spc25	Spc25	Spc25	chr3R:12950041-12967712	opa RNAi_14D	control_14D	OK	708.733	498.801	-0.506779	-1.15225	0.0459	0.188095
CoVb	CoVb	CoVb	chr2L:6557799-6559308	opa RNAi_14D	control_14D	OK	4132.61	2962.68	-0.48015	-1.14261	0.04595	0.188202
CG30291	CG30291	CG30291	chr2R:21007754-21009576	opa RNAi_14D	control_14D	OK	33.3962	52.3377	0.648164	1.12588	0.046	0.188212
CG7420	CG7420	CG7420	chr2L:1500783-1504204	opa RNAi_14D	control_14D	OK	3.00404	6.5413	1.12268	1.22742	0.046	0.188212
bowl	bowl	bowl	chr2L:3771699-3784121	opa RNAi_14D	control_14D	OK	0.735455	1.62143	1.14056	1.1855	0.04605	0.188222
Rs1	Rs1	Rs1	chr2R:8163563-8167769	opa RNAi_14D	control_14D	OK	66.435	98.7078	0.571222	1.15354	0.04605	0.188222
casp	casp	casp	chr2R:16024627-16028161	opa RNAi_14D	control_14D	OK	7.09007	11.8824	0.744952	1.13943	0.0462	0.188737
CG2608	CG2608	CG2608	chr2L:20645821-20647381	opa RNAi_14D	control_14D	OK	54.6161	34.7528	-0.652197	-1.15083	0.04625	0.188844
CG17660	CG17660	CG17660	chr2L:1707131-1710421	opa RNAi_14D	control_14D	OK	2.03533	3.94215	0.95372	1.1581	0.04635	0.189057
CG31988	CG31988	CG31988	chr2L:21201492-21202802	opa RNAi_14D	control_14D	OK	1.09406	2.43092	1.15181	1.11567	0.04635	0.189057
CG1542	CG1542	CG1542	chr3R:31213457-31214784	opa RNAi_14D	control_14D	OK	222.946	153.23	-0.540999	-1.13311	0.04655	0.189775
CG45089	CG45089	CG45089	chrX:7893052-7893798	opa RNAi_14D	control_14D	OK	877.5	581.723	-0.593066	-1.13644	0.0466	0.189783
Fancl	Fancl	Fancl	chr3R:10049198-10054348	opa RNAi_14D	control_14D	OK	19.1841	8.85949	-1.11462	-1.25993	0.0466	0.189783
CG2493	CG2493	CG2493	chr2L:20459341-20463444	opa RNAi_14D	control_14D	OK	113.994	166.858	0.549664	1.14084	0.0467	0.190093
pyd	pyd	pyd	chr3R:8824410-8931896	opa RNAi_14D	control_14D	OK	13.1362	21.6238	0.719075	1.20178	0.0468	0.190402
CG10195	CG10195	CG10195	chr2L:19482231-19484705	opa RNAi_14D	control_14D	OK	7.90604	4.22166	-0.905143	-1.16696	0.0469	0.190613
Lint-1	Lint-1	Lint-1	chrX:11149322-11153990	opa RNAi_14D	control_14D	OK	1.86569	0.793543	-1.23333	-1.18909	0.0469	0.190613
CG12773	CG12773	CG12773	chrX:1349622-1353981	opa RNAi_14D	control_14D	OK	2.48111	1.31957	-0.91092	-1.14674	0.04705	0.191124
Hsromega	Hsromega	Hsromega	chr3R:21296126-21317836	opa RNAi_14D	control_14D	OK	654.852	460.426	-0.508198	-1.14431	0.0471	0.191229
CG17834	CG17834	CG17834	chr2L:8529140-8541439	opa RNAi_14D	control_14D	OK	0.564399	1.35846	1.26718	1.13505	0.04715	0.191334
KdelR	KdelR	KdelR	chr2L:10426886-10428632	opa RNAi_14D	control_14D	OK	137.722	92.2278	-0.578485	-1.14809	0.04725	0.191543
Trl	Trl	Trl	chr3L:14747928-14761844	opa RNAi_14D	control_14D	OK	11.306	21.8639	0.951459	1.21773	0.04725	0.191543
Spt5	Spt5	Spt5	chr2R:19437482-19441898	opa RNAi_14D	control_14D	OK	5.85614	9.87838	0.754325	1.16063	0.0473	0.191647
Atg4a	Atg4a	Atg4a	chr2L:1080910-1102504	opa RNAi_14D	control_14D	OK	5.39093	10.0022	0.891708	1.13933	0.04735	0.191752
cal1	cal1	cal1	chr3R:17088279-17125389	opa RNAi_14D	control_14D	OK	2.63442	4.9795	0.918514	1.15363	0.0474	0.191856
Catsup	Catsup	Catsup	chr2L:19041861-19045148	opa RNAi_14D	control_14D	OK	73.4386	113.092	0.62289	1.1574	0.04745	0.191862
hpo	hpo	hpo	chr2R:19492086-19496856	opa RNAi_14D	control_14D	OK	23.4914	38.4196	0.709709	1.14063	0.04745	0.191862
CG42852	CG42852	CG42852	chr3L:16755488-16755720	opa RNAi_14D	control_14D	OK	0.992637	0	#NAME?	#NAME?	0.04765	0.192474
FRG1	FRG1	FRG1	chr3L:20295801-20296971	opa RNAi_14D	control_14D	OK	257.974	174.448	-0.564431	-1.15094	0.04765	0.192474
Ibf1	Ibf1	Ibf1	chr3R:9258963-9260400	opa RNAi_14D	control_14D	OK	470.54	326.267	-0.528267	-1.14894	0.0477	0.192577
CG30381	CG30381	CG30381	chr2R:7926652-7931016	opa RNAi_14D	control_14D	OK	0.381486	1.10145	1.5297	1.0734	0.04775	0.192681
CG31313	CG31313	CG31313	chr3R:14565926-14567429	opa RNAi_14D	control_14D	OK	91.3277	53.7218	-0.765546	-1.15497	0.04785	0.192986
CG13527	CG13527	CG13527	chr2R:22740998-22798289	opa RNAi_14D	control_14D	OK	1.18955	0	#NAME?	#NAME?	0.0479	0.193089
par-6	par-6	par-6	chrX:17703351-17707096	opa RNAi_14D	control_14D	OK	20.1607	31.1615	0.628216	1.14806	0.048	0.193394
CR45618	CR45618	CR45618	chrX:11716062-11716720	opa RNAi_14D	control_14D	OK	2.01539	0.645928	-1.64162	-1.23938	0.04805	0.193497
CG5033	CG5033	CG5033	chr2R:17789678-17792448	opa RNAi_14D	control_14D	OK	13.6527	21.6996	0.668485	1.12591	0.04825	0.194203
Ssrp	Ssrp	Ssrp	chr2R:23806360-23809004	opa RNAi_14D	control_14D	OK	8.94979	15.1642	0.760742	1.14958	0.0483	0.194306
CG34039	CG34039	CG34039	chr3L:14559999-14562613	opa RNAi_14D	control_14D	OK	10.6223	21.6598	1.02793	1.15498	0.04835	0.194408
CR44920	CR44920	CR44920	chr2L:21869955-21870652	opa RNAi_14D	control_14D	OK	1.21619	3.14053	1.36864	1.19734	0.04845	0.194711
CoVa	CoVa	CoVa	chr3R:11819358-11820299	opa RNAi_14D	control_14D	OK	2156.69	1560.92	-0.466428	-1.11315	0.04855	0.195014
fsd	fsd	fsd	chr2R:13230582-13231663	opa RNAi_14D	control_14D	OK	3.72369	7.42219	0.995111	1.17173	0.0486	0.195115
Gs1l	Gs1l	Gs1l	chr2L:4454625-4456807	opa RNAi_14D	control_14D	OK	21.819	12.3481	-0.821298	-1.14547	0.0487	0.195418
Mat89Ba	Mat89Ba	Mat89Ba	chr3R:16267011-16272415	opa RNAi_14D	control_14D	OK	3.83496	6.62498	0.788705	1.14172	0.04885	0.19592
Ance	Ance	Ance	chr2L:13905644-13909212	opa RNAi_14D	control_14D	OK	2.71069	5.44159	1.00537	1.16025	0.0489	0.196021
bbc	bbc	bbc	chr2R:13486633-13494862	opa RNAi_14D	control_14D	OK	8.69266	4.39731	-0.983175	-1.16585	0.049	0.196323
bnl	bnl	bnl	chr3R:19794074-19836817	opa RNAi_14D	control_14D	OK	0.632298	1.41846	1.16565	1.12467	0.04905	0.196424
CR43962	CR43962	CR43962	chrX:22514452-22514891	opa RNAi_14D	control_14D	OK	4.80666	1.51312	-1.66751	-1.21687	0.0491	0.196425
Efr	Efr	Efr	chrX:6219956-6222719	opa RNAi_14D	control_14D	OK	0.262334	0.682668	1.37978	1.12564	0.0491	0.196425
CG11807	CG11807	CG11807	chr2R:15201252-15204466	opa RNAi_14D	control_14D	OK	7.94792	4.17389	-0.929184	-1.19219	0.04915	0.196426
Krn	Krn	Krn	chr3L:17647441-17654280	opa RNAi_14D	control_14D	OK	39.9958	21.942	-0.866156	-1.15503	0.04915	0.196426
CG9067	CG9067	CG9067	chr2R:11278892-11279683	opa RNAi_14D	control_14D	OK	236.633	155.329	-0.60732	-1.1242	0.0493	0.196926
CG7884	CG7884	CG7884	chrX:19220621-19235910	opa RNAi_14D	control_14D	OK	5.27096	3.01112	-0.807766	-1.14566	0.04945	0.197326
slv	slv	slv	chr2R:8080558-8087151	opa RNAi_14D	control_14D	OK	17.0245	9.1772	-0.891484	-1.17082	0.04945	0.197326
CG18823	CG18823	CG18823	chrX:990517-991184	opa RNAi_14D	control_14D	OK	3.48196	1.43931	-1.27452	-1.09785	0.04955	0.197625
CG31937	CG31937	CG31937	chr2L:1729886-1732356	opa RNAi_14D	control_14D	OK	38.288	66.5629	0.797825	1.14113	0.0496	0.197725
plum	plum	plum	chr3R:26470077-26535217	opa RNAi_14D	control_14D	OK	0.615182	0.298392	-1.0438	-1.1264	0.0497	0.198024
CG18131	CG18131	CG18131	chr2L:1497242-1500608	opa RNAi_14D	control_14D	OK	1.05882	0.0469204	-4.4961	-1.37541	0.0498	0.198322
RpS30	RpS30	RpS30	chr3R:20850515-20851427	opa RNAi_14D	control_14D	OK	3997.57	2905.98	-0.460098	-1.09884	0.04985	0.198422
Mst36Fb	Mst36Fb	Mst36Fb	chr2L:18673362-18675094	opa RNAi_14D	control_14D	OK	0.737985	0.228249	-1.69298	-1.24826	0.04995	0.19872
CREG	CREG	CREG	chr3R:17393271-17394640	opa RNAi_14D	control_14D	OK	459.371	315.57	-0.541697	-1.13358	0.0502	0.199614
RpS28b	RpS28b	RpS28b	chrX:9554622-9556544	opa RNAi_14D	control_14D	OK	4175.98	3012.45	-0.471176	-1.11476	0.05045	0.200507
bcd	bcd	bcd	chr3R:6755841-6759466	opa RNAi_14D	control_14D	OK	2.41849	1.18558	-1.02851	-1.19472	0.05055	0.200804
ast	ast	ast	chr2L:1077947-1080803	opa RNAi_14D	control_14D	OK	1.00522	1.96969	0.970458	1.11926	0.05085	0.201894
comm	comm	comm	chr3L:15721510-15728430	opa RNAi_14D	control_14D	OK	3.0543	5.83364	0.933553	1.15661	0.05115	0.202983
CG12006	CG12006	CG12006	chr3L:3811262-3813958	opa RNAi_14D	control_14D	OK	52.2366	77.4253	0.567743	1.12491	0.05145	0.203969
CG32756	CG32756	CG32756	chrX:5945681-5950208	opa RNAi_14D	control_14D	OK	15.9829	9.0301	-0.823712	-1.13623	0.05145	0.203969
CG3065	CG3065	CG3065	chr2R:23970304-23972233	opa RNAi_14D	control_14D	OK	4.63445	8.50456	0.875837	1.11414	0.0516	0.204461
CG12428	CG12428	CG12428	chr3R:27700360-27706751	opa RNAi_14D	control_14D	OK	9.17219	15.142	0.72322	1.12812	0.05175	0.204638
CG17202	CG17202	CG17202	chr3R:12422767-12423606	opa RNAi_14D	control_14D	OK	6.72264	13.2798	0.982132	1.15202	0.05175	0.204638
CG7194	CG7194	CG7194	chr3L:8302363-8304059	opa RNAi_14D	control_14D	OK	9.28662	5.1381	-0.853918	-1.11065	0.0517	0.204638
[truncated: 14,511 more rows]
