# Supplementary material for: Odd-paired is a pioneer-like factor that coordinates with Zelda to control gene expression in embryos
Source: eLife. 2020 Jul 23;9:e59610. doi: 10.7554/eLife.59610 (PMC7417190; doi:10.7554/eLife.59610)
Supplement: Figure 5—source data 1. [file elife-59610-fig5-data1.xlsx]

## Sheet: opa_nc14b
PeakID (cmd=annotatePeaks.pl opa_nc14b_peaks_q1E-5_091019.bed dm6)	Chr	Start	End	Strand	Peak Score	Focus Ratio/Region Size	Annotation	Detailed Annotation	Distance to TSS	Nearest PromoterID	Entrez ID	Nearest Unigene	Nearest Refseq	Nearest Ensembl	Gene Name	Gene Alias	Gene Description	Gene Type
3478	chr2R	6758641	6759790	+	0	NA	promoter-TSS (NM_136391)	promoter-TSS (NM_136391)	-312	NM_136391	35586	Dm.11553	NM_136391		CG9436	Dmel\CG9436	CG9436	protein-coding
3762	chr2R	8891281	8891780	+	0	NA	promoter-TSS (NM_001273883)	promoter-TSS (NM_001273883)	-129	NM_001273883	35875	Dm.534	NM_136569		CG8272	CT8327|Dmel\CG8272|FBXL9	CG8272	protein-coding
2519	chr2L	19735221	19736460	+	0	NA	promoter-TSS (NM_001038825)	promoter-TSS (NM_001038825)	-120	NM_001273670	35260	Dm.12147	NM_136152		CG10462	BcDNA:SD07008|Dmel\CG10462	uncharacterized protein	protein-coding
4936	chr2R	16684111	16684960	+	0	NA	promoter-TSS (NM_001103873)	promoter-TSS (NM_001103873)	-542	NM_001103873	246627	Dm.24533	NM_166188		CG30463	CG15713|CG8456|CG8463|Dmel\CG30463|dppGalNAcT9	uncharacterized protein	protein-coding
6595	chr3L	3784861	3786000	+	0	NA	intron (NM_168038, intron 1 of 11)	intron (NM_168038, intron 1 of 11)	2530	NM_168038	38438	Dm.6508	NM_168037		CG32264	CG10857|CG10860|CG12604|CG14978|Dmel\CG32264	uncharacterized protein	protein-coding
9544	chr3R	2759001	2759250	+	0	NA	intron (NM_001316564, intron 13 of 20)	PROTOP_A|DNA|P	-14325	NR_125325	19835739		NR_125325		CR45220	Dmel\CR45220	ncRNA	ncRNA
9635	chr3R	4241931	4242800	+	0	NA	TTS (NM_001104201)	TTS (NM_001104201)	352	NM_141184	40532	Dm.1937	NM_141184		CG14642	Dmel\CG14642|SP29	uncharacterized protein	protein-coding
11806	chr3R	19864271	19864810	+	0	NA	promoter-TSS (NM_169879)	promoter-TSS (NM_169879)	44	NM_142580	42361	Dm.20405	NM_142580		CG4686	BcDNA:AT09463|Dmel\CG4686	CG4686	protein-coding
4695	chr2R	14965671	14965950	+	0	NA	5' UTR (NM_166076, exon 1 of 6)	5' UTR (NM_166076, exon 1 of 6)	126	NM_166076	36673	Dm.6249	NM_137165		ckn	BcDNA:GM06913|CG12424|Dmel\CG12424	caskin	protein-coding
1794	chr2L	13715241	13715610	+	0	NA	intron (NM_001298975, intron 1 of 11)	CpG	1895	NM_001298975	318958	Dm.30835	NM_165049		CG31814	31814|BG:DS08249.1|Dmel\CG31814	uncharacterized protein	protein-coding
13464	chr4	581791	582050	+	0	NA	Intergenic	FB4_DM|DNA|TcMar-Tc1	-1188	NM_143671	43800	Dm.1402	NM_143671		CG1909	Dmel\CG1909	CG1909	protein-coding
15386	chrX	13728571	13729400	+	0	NA	exon (NM_001272599, exon 11 of 13)	exon (NM_001272599, exon 11 of 13)	6704	NM_001272600	44819	Dm.1817	NM_080046		g	AP-3delta|AP3delta|CG10986|CG11197|Dmel\CG10986|apl5|cg11197|delta|l(1)Mc19	garnet	protein-coding
9679	chr3R	4470071	4470680	+	0	NA	intron (NM_169006, intron 1 of 7)	CpG	904	NM_001300229	326148	Dm.21128	NM_141217		CG31523	CG9798|Dmel\CG31523	uncharacterized protein	protein-coding
5831	chr2R	23621441	23621970	+	0	NA	Intergenic	CpG	-4951	NM_176253	37737	Dm.750	NM_137967		Eglp2	Aqp17664|CG17664|Dmel\CG17664|Eglp 2	Entomoglyceroporin 2	protein-coding
8206	chr3L	16334991	16335280	+	0	NA	Intergenic	Intergenic	1822	NM_144157	50267	Dm.27499	NM_144157		CG13056	Dmel\CG13056	uncharacterized protein	protein-coding
7013	chr3L	7603271	7603960	+	0	NA	intron (NM_001274604, intron 2 of 16)	intron (NM_001274604, intron 2 of 16)	-1420	NM_206295	2768948	Dm.15507	NM_206293		Pura	CG33167|CG33275|CG7511|CG7513|CG7515|CG7520|Dmel\CG33275	Puratrophin-1-like	protein-coding
1520	chr2L	11243731	11244140	+	0	NA	intron (NM_057214, intron 7 of 8)	intron (NM_057214, intron 7 of 8)	9084	NM_001273450	34560	Dm.1729	NM_057214		ab	Ab|B2149|CG32830|CG43860|CG4807|Dmel\CG43860|Dmel_CG32830|Dmel_CG4807|clu|l(2)k02807|ptd	abrupt	protein-coding
1730	chr2L	13191191	13192490	+	0	NA	promoter-TSS (NM_001273505)	promoter-TSS (NM_001273505)	139	NM_135766	34713	Dm.10738	NM_135766		CG16974	CT35580|Dmel\CG16974|Dromel_CG16974_FBtr0080489_mORF	uncharacterized protein	protein-coding
4855	chr2R	16124741	16125870	+	0	NA	TTS (NM_166143)	TTS (NM_166143)	324	NM_166144	45380	Dm.3446	NM_080084		spin	25/11|CG8428|Dmel\CG8428|Spin|bnch|l(2)10403|l(2)W5|l(2)k02511|l(2)k09905|l(2R)W5	spinster	protein-coding
12342	chr3R	23844231	23844540	+	0	NA	intron (NM_001316615, intron 3 of 13)	ROO_LTR|LTR|Pao	15245	NR_002078	3772037	Dm.34169	NR_002078		snRNA:U1:95Ca	95C U1|CR31341|DMU1951|Dmel\CR31341|K5|U1|U1 snRNA|U1-95.1|U1-95Ca|U1951|U1:95C|U1:95Ca|U1a|U1a-95Ca|U1snRNA|U1snRNA 95.1|U1snRNA95Ca|snRNA-U1-95.1|snRNA:U1|u1a	small nuclear RNA U1 at 95Ca	ncRNA
1030	chr2L	7538901	7539260	+	0	NA	intron (NM_001103644, intron 1 of 4)	intron (NM_001103644, intron 1 of 4)	5347	NM_001014479	34032	Dm.3069	NM_144299		RapGAP1	CG13789|CG13790|CG13791|CG33529|CG34374|CG44086|CG6682|Dmel\CG44086|Dmel_CG13790|Dmel_CG13791|Dmel_CG33529|Dmel_CG34374|FBpp0111515|Q9VM02_DROME|RapGap1|Rapgap1|rapgap1	Rap GTPase activating protein 1	protein-coding
387	chr2L	2993761	2994030	+	0	NA	exon (NM_001144305, exon 2 of 7)	exon (NM_001144305, exon 2 of 7)	922	NM_143807	48421	Dm.10651	NM_143807		CG3558	BEST:LD23852|Dmel\CG3558|FBgn0025681|LD23852|c4.3	CG3558	protein-coding
654	chr2L	5042961	5043440	+	0	NA	promoter-TSS (NM_001038788)	promoter-TSS (NM_001038788)	-42	NM_001169408	326150	Dm.19783	NM_135055		CG31650	CG9112|Dmel\CG31650|RCN2	uncharacterized protein	protein-coding
14827	chrX	8907901	8908660	+	0	NA	exon (NM_001042799, exon 2 of 17)	exon (NM_001042799, exon 2 of 17)	1212	NM_001042799	31826	Dm.5516	NM_078537		rdgA	CG10966|CG12660|CG15352|CG34344|CG42667|DGK|DGK2|Dmel\CG42667|Dmel_CG10966|Dmel_CG12660|Dmel_CG15352|Dmel_CG34344|RDGA|dDGK2|dgk-5|x35	retinal degeneration A	protein-coding
12248	chr3R	23127381	23128220	+	0	NA	TTS (NM_001038976)	TTS (NM_001038976)	181	NM_170051	326142	Dm.21126	NM_170051		CG31457	CG4639|Dmel\CG31457	uncharacterized protein	protein-coding
5871	chr2R	23882101	23882500	+	0	NA	promoter-TSS (NM_058029)	promoter-TSS (NM_058029)	100	NM_058029	37787	Dm.3921	NM_058029		CG4882	Dmel\CG4882|GM14313|LD24471|UD1|anon-60Aa	CG4882	protein-coding
4218	chr2R	11669451	11669870	+	0	NA	exon (NM_136849, exon 3 of 8)	exon (NM_136849, exon 3 of 8)	-2396	NM_165845	36248	Dm.6727	NM_136849		Tret1-1	CG30035|CG7797|CG7801|DmTret1-1|Dmel\CG30035|Tre T1	Trehalose transporter 1-1	protein-coding
8682	chr3L	19924551	19925310	+	0	NA	promoter-TSS (NM_140903)	promoter-TSS (NM_140903)	-13	NM_140903	40177	Dm.33993	NM_140903		Grasp65	CG7809|Dmel\CG7809|GRASP|GRASP65|dGRASP|dGrasp65|dgrasp	Grasp65	protein-coding
989	chr2L	7254631	7254940	+	0	NA	TTS (NM_057624)	TTS (NM_057624)	-1803	NM_135262	34006	Dm.26749	NM_135262		CG13786	Dmel\CG13786	uncharacterized protein	protein-coding
14439	chrX	6291921	6292460	+	0	NA	promoter-TSS (NM_132080)	promoter-TSS (NM_132080)	887	NM_132081	31568		NM_132081		mldr	CG15896|Dmel\CG15896|PRORP	mulder	protein-coding
2030	chr2L	15718371	15718680	+	0	NA	Intergenic	Intergenic	-7426	NM_001273542	14462777	Dm.38923	NM_001273542		CG43924	Dmel\CG43924	uncharacterized protein	protein-coding
7593	chr3L	12431781	12432170	+	0	NA	intron (NM_001274833, intron 1 of 5)	intron (NM_001274833, intron 1 of 5)	693	NM_001274833	39418	Dm.941	NM_079317		toe	CG10704|Dmel\CG10704|Toe|anon-WO0172774.89	twin of eyg	protein-coding
14225	chrX	4559581	4559950	+	0	NA	exon (NM_131944, exon 1 of 1)	exon (NM_131944, exon 1 of 1)	1693	NM_131944	31389		NM_131944		CG3546	Dmel\CG3546	CG3546	protein-coding
30	chr2L	124371	124770	+	0	NA	TTS (NR_123999)	TTS (NR_123999)	1733	NR_123999	19835409		NR_123999		CR44969	Dmel\CR44969	ncRNA	ncRNA
3088	chr2R	2598991	2599300	+	0	NA	Intergenic	DM297_I-int|LTR|Gypsy	-33760	NM_001015095	3354861	Dm.28163	NM_001015095		MFS17	BEST:LD07241|CG40263|Dmel\CG40263|bs24e02.y1	Major Facilitator Superfamily Transporter 17	protein-coding
8483	chr3L	18331351	18331940	+	0	NA	Intergenic	Intergenic	-27228	NM_079413	40014	Dm.2372	NM_079413		grim	BcDNA:RE28551|CG4345|Dmel\CG4345|GRIM|Grim|gri|grm	grim	protein-coding
9376	chr3L	27585391	27585880	+	0	NA	Intergenic	DMRT1B|LINE|R1	-219645	NR_133316	26067560		NR_133316		CR46250	Dmel\CR46250	ncRNA	ncRNA
70	chr2L	353971	354740	+	0	NA	intron (NM_205884, intron 17 of 17)	BLOOD_I-int|LTR|Gypsy	-1308	NR_124001	19835000		NR_124001		CR45367	Dmel\CR45367	ncRNA	ncRNA
9063	chr3L	22776411	22777100	+	0	NA	intron (NM_168962, intron 2 of 4)	intron (NM_168962, intron 2 of 4)	2718	NM_001170025	40495	Dm.31157	NM_168961		SPoCk	CG14449|CG32451|CG7651|Dmel\CG32451|SPoCK|anon-WO0118547.249	Secretory Pathway Calcium atpase	protein-coding
14725	chrX	8218371	8218940	+	0	NA	intron (NM_132236, intron 2 of 11)	intron (NM_132236, intron 2 of 11)	1831	NM_001042798	44861	Dm.17605	NM_132235		sdt	BP1063|CG12657|CG12658|CG15339|CG15340|CG15341|CG15342|CG1617|CG32717|Dmel\CG32717|PALS1|Pals1|Sdt|Std|anon-EST:fe2E6|cGUK1|cMAGUK1|l(1)7Ef|pal1|std	stardust	protein-coding
11666	chr3R	18745381	18746550	+	0	NA	promoter-TSS (NM_142494)	promoter-TSS (NM_142494)	76	NM_142494	42254	Dm.5910	NM_142494		CG7718	Dmel\CG7718|PL D	CG7718	protein-coding
13174	chr3R	30805731	30807460	+	0	NA	promoter-TSS (NM_170524)	promoter-TSS (NM_170524)	24	NM_170524	43651	Dm.4172	NM_170524		wts	CG12072|Dlats|Dmel\CG12072|LATS|LATS1|Lats|Lats/Warts|MENE (3R)-G|WTS/LATS|Warts|Warts/Lats|Wts|Wts/Lats|dmLATS|l(3)100Aa|lats|lts|wart|warts/lats|wts/lats	warts	protein-coding
4463	chr2R	13197941	13198770	+	0	NA	promoter-TSS (NM_001169668)	promoter-TSS (NM_001169668)	-18	NM_176164	318918	Dm.6975	NM_176164		Kdm4B	CG33182|CG4037|Dmel\CG33182|KDM4B|dJMJD2(2)|dKDM4B|dKdm4B	Lysine (K)-specific demethylase 4B	protein-coding
7053	chr3L	8109901	8110650	+	0	NA	promoter-TSS (NM_139917)	promoter-TSS (NM_139917)	-93	NM_001274628	38897	Dm.7379	NM_139917		CG7927	BcDNA:GH11023|Dmel\CG7927|anon-WO0172774.138	CG7927	protein-coding
8424	chr3L	17986341	17986640	+	0	NA	intron (NM_001259892, intron 4 of 7)	CpG	-4649	NR_133261	26067249		NR_133261		CR45921	Dmel\CR45921	ncRNA	ncRNA
4437	chr2R	13026881	13027680	+	0	NA	Intergenic	Intergenic	19976	NM_001299441	36433	Dm.24504	NM_136988		CG13323	Dmel\CG13323|FBgn0033788	uncharacterized protein	protein-coding
1390	chr2L	10363781	10365110	+	0	NA	promoter-TSS (NM_135546)	promoter-TSS (NM_135546)	-26	NM_135546	34405	Dm.23864	NM_135546		lft	CG13139|Dmel\CG13139	lowfat	protein-coding
9152	chr3L	23444871	23445230	+	0	NA	Intergenic	Intergenic	105724	NM_168989	317928	Dm.33502	NM_168988		ND-MLRQ	BEST:GH04411|BcDNA:RE56733|CG32230|Dmel\CG32230|NUML	NADH dehydrogenase (ubiquinone) MLRQ subunit	protein-coding
5485	chr2R	21017261	21017940	+	0	NA	promoter-TSS (NM_001103921)	promoter-TSS (NM_001103921)	-154	NM_137692	37382	Dm.30999	NM_137692		CG3295	Dmel\CG3295	CG3295	protein-coding
6336	chr3L	1628071	1628630	+	0	NA	promoter-TSS (NM_139378)	promoter-TSS (NM_139378)	27	NM_139378	38195	Dm.33555	NM_139378		CG13928	Dmel\CG13928	uncharacterized protein	protein-coding
2048	chr2L	15761691	15762910	+	0	NA	5' UTR (NM_165130, exon 1 of 8)	5' UTR (NM_165130, exon 1 of 8)	108	NM_165129	34927	Dm.6515	NM_057254		Gli	BG:DS09217.3|CG3903|Dmel\CG3903|gli|l(2)35Dg|l(2)br45|n(2)k09033	Gliotactin	protein-coding
3077	chr2R	2507531	2508090	+	0	NA	intron (NM_001110894, intron 4 of 4)	ROO_LTR|LTR|Pao	44472	NR_047702	12798493	Dm.38842	NR_047702		mir-2279	CR42911|Dmel\CR42911|dme-mir-2279|miR-2279	mir-2279 stem loop	ncRNA
10095	chr3R	6996651	6997430	+	0	NA	intron (NM_206446, intron 1 of 6)	intron (NM_206446, intron 1 of 6)	2188	NM_206453	40835	Dm.3803	NM_206444		Antp	3.4|ANT-C|ANT-P|ANTC|ANTP|Ant|AntP|AntP1|Antp P1|Antp P2|Antp1|Aus|BG:DS07700.1|CG1028|DMANTPE1|DRO15DC96Z|DmAntp|Dmel\CG1028|Hu|Ns|Scx|antp|l(3)84Ba	Antennapedia	protein-coding
16142	chrX	19606911	19607480	+	0	NA	intron (NM_001298517, intron 1 of 3)	intron (NM_001298517, intron 1 of 3)	1996	NM_001298517	32955	Dm.3602	NM_134482		CG14207	Dmel21.3|Dmel\CG14207|Hsp20-like protein|HspB8|dHspB8	uncharacterized protein	protein-coding
748	chr2L	5754951	5755200	+	0	NA	intron (NM_135112, intron 1 of 3)	intron (NM_135112, intron 1 of 3)	8918	NM_135111	33804	Dm.34157	NM_135111		CG11029	Dmel\CG11029	uncharacterized protein	protein-coding
6921	chr3L	6772491	6772750	+	0	NA	Intergenic	Intergenic	-9374	NM_168180	38751	Dm.4601	NM_139802		CG32392	CG10099|CG14912|Dmel\CG32392	uncharacterized protein	protein-coding
7406	chr3L	11018871	11019360	+	0	NA	Intergenic	Intergenic	-4420	NM_143709	44006	Dm.3344	NM_143709		Fad2	CG7923|Dmel\CG7923|desatF|desatF-alpha|fad|fad2	Fad2	protein-coding
11263	chr3R	15960621	15960890	+	0	NA	TTS (NM_001275688)	TTS (NM_001275688)	3112	NM_142257	41939	Dm.7852	NM_142257		CG4287	Dmel\CG4287	CG4287	protein-coding
4592	chr2R	14152491	14153460	+	0	NA	promoter-TSS (NM_001274036)	promoter-TSS (NM_001274036)	148	NM_001274033	36560	Dm.615	NM_137083		Rcd1	CG8233|Dmel\CG8233|NSL3|Nsl3|cg8233	Reduction in Cnn dots 1	protein-coding
13555	chr4	1031521	1032280	+	0	NA	promoter-TSS (NM_166808)	promoter-TSS (NM_166808)	36	NM_001297790	43829	Dm.1407	NM_166808		ATPsynbeta	ATP|ATP syn-beta|ATP-B|ATP-syn-B|ATP-synbeta|ATPB|ATPase beta|ATPase-beta|ATPasebeta|ATPsyn b|ATPsyn-&bgr|ATPsyn-b|ATPsyn-beta|CG11154|Comp V beta|Dmel\CG11154|beta-ATPase	ATP synthase, beta subunit	protein-coding
15842	chrX	17396731	17397700	+	0	NA	promoter-TSS (NM_001272713)	promoter-TSS (NM_001272713)	-263	NM_001272713	32724	Dm.2610	NM_078663		B-H1	BH1|Bar|Bar H1|Bar-H1|BarH|BarHI|Barh1|CG5529|Dmel\CG5529|bar-h1|barH1|barh1	BarH1	protein-coding
13095	chr3R	30223251	30223610	+	0	NA	Intergenic	Intergenic	6946	NM_079852	43599	Dm.20562	NM_079852		CecC	BcDNA:RH33561|CG1373|Cec|Cec-C|Dmel\CG1373|cec|cecC	Cecropin C	protein-coding
7098	chr3L	8457191	8457770	+	0	NA	intron (NM_001259742, intron 2 of 14)	intron (NM_001259742, intron 2 of 14)	6832	NM_145106	46156	Dm.892	NM_079249		Gug	Atro|CG6964|Dmel\CG6964|GUG|atro|gug|l(3)01323|l(3)03928|l(3)S146907|l(3)j5A3|l(3)rO116	Grunge	protein-coding
14165	chrX	4130921	4131490	+	0	NA	promoter-TSS (NM_167003)	promoter-TSS (NM_167003)	-6	NM_167003	251900	Dm.3928	NM_167003		GlcAT-I	BcDNA:GH05057|CAA21824|CG32775|DGlcAT-I|DmGlcAT-I|Dmel\CG32775|EG:EG0007.5|GH05057p|GlcAT1|RE38067|dGlcAT-I	GlcAT-I	protein-coding
7713	chr3L	13113541	13117600	+	0	NA	exon (NM_079331, exon 2 of 2)	exon (NM_079331, exon 2 of 2)	1299	NM_079331	39491	Dm.2255	NM_079331		trn	0024/05|0641/17|CG11280|CT31487|Dmel\CG11280|anon-EST:fe2B1	tartan	protein-coding
15891	chrX	17762831	17764270	+	0	NA	Intergenic	Intergenic	-5019	NM_001298461	32757		NM_133014		unc-4	CG6269|DPHD-1|Dmel\CG6269|Dunc-4|Unc4	unc-4	protein-coding
5627	chr2R	22122131	22123010	+	0	NA	promoter-TSS (NM_001103936)	promoter-TSS (NM_001103936)	-8	NM_166508	37521	Dm.7264	NM_137796		Vrp1	CG13503|D-WIP|Dm_Vrp1|Dmel\CG13503|Sltr|WIP|dWIP|sltr|solas|vrp|vrp1|wip	Verprolin 1	protein-coding
6264	chr3L	1178581	1178860	+	0	NA	Intergenic	Intergenic	-1444	NM_001274313	44254	Dm.3003	NM_079155		bab2	BAB|BAB2|BTB-II|Bab2|BtbII|CG13911|CG9102|Dmel\CG9102|bab|bab-II	bric a brac 2	protein-coding
12245	chr3R	23117581	23118830	+	0	NA	promoter-TSS (NM_142869)	promoter-TSS (NM_142869)	-195	NM_079734	42735	Dm.6985	NM_079734		CenB1A	ACAP|CG6742|Cen1ba|Dmel\CG6742|cenB1A	Centaurin beta 1A	protein-coding
8698	chr3L	20122651	20123010	+	0	NA	Intergenic	ROO_LTR|LTR|Pao	3672	NM_001275159	40200	Dm.1011	NM_140921		CG7365	Dmel\CG7365	CG7365	protein-coding
3795	chr2R	9109451	9109860	+	0	NA	promoter-TSS (NM_136609)	promoter-TSS (NM_136609)	63	NM_136609	35923		NM_136609		Pmm45A	CG8073|Dmel\CG8073	Phosphomannomutase 45A	protein-coding
10831	chr3R	12425071	12426490	+	0	NA	promoter-TSS (NM_141938)	promoter-TSS (NM_141938)	137	NM_080198	49260	Dm.1623	NM_080198		Pp1-87B	87B|CG5650|DmPp1-87B|Dmel\CG5650|PP-1alpha|PP1|PP1 87B|PP1 beta87b|PP1-87B|PP187B|PP1A87B|PP1B|PP1alpha-87B|PP1alpha87B|PP1alpha[[2]]|PP1c|PP1c 87B|PPI 87B|Pp-1alpha|Pp1|Pp1-87Bb|Pp1alpha-87B|Ppl-87B|Su(Var)3-6|Su(var)(3)6|Su(var)3-6|Su-var(3)6|Suvar(3)6|ck19|dPP1beta|l(3)87Bg|l(3)ck19|l(3)j6E7|pp1-87B|su-var(3)6	Protein phosphatase 1 at 87B	protein-coding
6093	chr3L	128191	128890	+	0	NA	promoter-TSS (NM_001274254)	promoter-TSS (NM_001274254)	-874	NR_124738	19835792		NR_124738		CR45400	Dmel\CR45400	ncRNA	ncRNA
966	chr2L	7134461	7135880	+	0	NA	intron (NM_001103637, intron 1 of 5)	intron (NM_001103637, intron 1 of 5)	-1101	NM_001103639	33995	Dm.4699	NM_001103637		Pvf3	CG13781|CG13782|CG13783|CG31629|CG34378|CG4492|DmVEGF-3|Dmel\CG34378|Dmel_CG13783|Dmel_CG31629|PVF|PVF3|PVFs|Pvf|VEGF|VEGF27Ca|Vegf27Ca|pvf3	PDGF- and VEGF-related factor 3	protein-coding
4608	chr2R	14230701	14231480	+	0	NA	TTS (NM_166039)	TTS (NM_166039)	2097	NR_048111	12798453		NR_048111		mir-1016	CR42981|Dmel\CR42981|dme-mir-1016|miR-1016	mir-1016 stem loop	ncRNA
14253	chrX	4676591	4678510	+	0	NA	promoter-TSS (NM_167013)	promoter-TSS (NM_167013)	-17	NM_167013	45922	Dm.1470	NM_080113		rap	APC/C[Fzr/Cdh1]|CDH1|CG3000|Cdh1|Cdh1/Fzr|Cdh1[Fzr]|Cdh[Fzr]|Dmel\CG3000|Fxr|Fzr|Fzr/rap|Hec/Cdh[Fzr]|Rap/Fzr|anon-WO03040301.193|cdh1|dFZR|fzr|fzr/Cdh1|l(1)G0326|l(1)G0418|rap/Fzr|rap/fizzy-related|rap/fzr|redax|wex	retina aberrant in pattern	protein-coding
14961	chrX	10113171	10114030	+	0	NA	TTS (NR_123853)	TTS (NR_123853)	-10747	NR_003733	5740428		NR_003733		snoRNA:Me18S-A627	CR34674|Dmel\CR34674|Me18S-Am627	ncRNA	ncRNA
8464	chr3L	18240531	18240860	+	0	NA	Intergenic	Intergenic	-3005	NR_133265	26067263		NR_133265		CR45936	Dmel\CR45936|lincRNA.600	ncRNA	ncRNA
4545	chr2R	13871631	13871930	+	0	NA	intron (NM_001259378, intron 17 of 26)	intron (NM_001259378, intron 17 of 26)	-9778	NM_137070	36540	Dm.30974	NM_137070		CG16935	DM_7303260|Dmel\CG16935	uncharacterized protein	protein-coding
8736	chr3L	20442661	20443910	+	0	NA	intron (NM_140969, intron 1 of 5)	intron (NM_140969, intron 1 of 5)	866	NM_140969	40264	Dm.28319	NM_140969		CG5910	CK02563|Dmel\CG5910	CG5910	protein-coding
5951	chr2R	24525221	24525470	+	0	NA	promoter-TSS (NM_138081)	promoter-TSS (NM_138081)	744	NM_138080	37914	Dm.773	NM_138080		CG4612	Dmel\CG4612|cg4612	CG4612	protein-coding
9545	chr3R	2776641	2777100	+	0	NA	intron (NM_001316564, intron 13 of 20)	TRANSPAC_I-int|LTR|Gypsy	-32070	NR_125325	19835739		NR_125325		CR45220	Dmel\CR45220	ncRNA	ncRNA
7128	chr3L	8627831	8628300	+	0	NA	intron (NM_139989, intron 3 of 6)	intron (NM_139989, intron 3 of 6)	1856	NM_168284	38988	Dm.7126	NM_139989		Zasp66	CG6416|Dmel\CG6416|ZASP66|Zaps66|anon-WO0153538.30	Z band alternatively spliced PDZ-motif protein 66	protein-coding
13648	chrX	456861	457510	+	0	NA	intron (NM_001144667, intron 1 of 2)	intron (NM_001144667, intron 1 of 2)	-3562	NM_057346	30985	Dm.4781	NM_057346		ase	AS-C T8|AS-C T8ase|AS-T8|ASC|Ase|CG3258|Dmel\CG3258|EG:165H7.2|T1|T1A|T1a|T8|as-T8|ascT8|bHLHc28|sc/T8	asense	protein-coding
3534	chr2R	7169881	7170260	+	0	NA	intron (NM_165508, intron 1 of 5)	CpG	-2103	NM_165509	45343	Dm.3470	NM_165508		pk	CG11084|CG12830|Dmel\CG11084|Pk|Pk-Sple|Sple|pk-sple|pkM|sple	prickle	protein-coding
2422	chr2L	19139551	19140230	+	0	NA	intron (NM_001201913, intron 1 of 4)	intron (NM_001201913, intron 1 of 4)	-4657	NM_001273633	35196	Dm.30851	NM_136106		l(2)37Cg	CG10685|Cg|Dmel\CG10685	lethal (2) 37Cg	protein-coding
14467	chrX	6599511	6599810	+	0	NA	promoter-TSS (NM_132103)	promoter-TSS (NM_132103)	-402	NM_001298020	31596	Dm.19679	NM_132103		pigs	CG3973|Dmel\CG3973	pickled eggs	protein-coding
235	chr2L	1516931	1518740	+	0	NA	promoter-TSS (NM_134759)	promoter-TSS (NM_134759)	313	NM_001144293	33334	Dm.6052	NM_001144293		halo	CG7428|Dmel\CG7428	halo	protein-coding
12395	chr3R	24169261	24169850	+	0	NA	promoter-TSS (NM_142967)	promoter-TSS (NM_142967)	7	NM_142967	42872	Dm.23338	NM_142967		CG5510	Dmel\CG5510	CG5510	protein-coding
10352	chr3R	8859621	8859990	+	0	NA	intron (NM_001260071, intron 2 of 5)	intron (NM_001260071, intron 2 of 5)	-2144	NM_001144556	41062	Dm.7093	NM_057349		pyd	CG11782|CG11962|CG12409|CG31349|CG43140|CG9729|CG9731|CG9763|CT36877|DZO-1|Dmel\CG43140|Dmel_CG31349|Dmel_CG9731|Pch|Pyd|Pyd/ZO-1|Tamou|ZO-1|ZO1|dzo-1|pyd(Z01)|tam|xvt	polychaetoid	protein-coding
11831	chr3R	20039111	20039410	+	0	NA	3' UTR (NM_001170188, exon 3 of 3)	3' UTR (NM_001170188, exon 3 of 3)	-3204	NM_142606	42394	Dm.23331	NM_142606		CG10889	Dmel\CG10889	uncharacterized protein	protein-coding
14655	chrX	7894831	7895360	+	0	NA	exon (NM_132189, exon 1 of 1)	exon (NM_132189, exon 1 of 1)	1064	NM_132189	31698	Dm.4686	NM_132189		p115	CG1422|Dmel\CG1422|dp115|l(1)G0306	p115	protein-coding
12600	chr3R	25650501	25651330	+	0	NA	promoter-TSS (NR_048488)	promoter-TSS (NR_048488)	343	NR_133452	26067245		NR_133452		CR45917	Dmel\CR45917|pri-mir-92b	ncRNA	ncRNA
12149	chr3R	22293791	22294330	+	0	NA	exon (NM_001275898, exon 19 of 19)	exon (NM_001275898, exon 19 of 19)	1181	NR_048461	12798509		NR_048461		mir-1010	CR42905|Dmel\CR42905|dme-miR-1010|dme-mir-1010|miR-1010	mir-1010 stem loop	ncRNA
4751	chr2R	15378481	15379450	+	0	NA	intron (NM_001299522, intron 2 of 2)	intron (NM_001299522, intron 2 of 2)	1649	NM_001299522	47121	Dm.1771	NM_080139		dup	19k|CDT1|CDT1/DUP|CG8171|Cdt1|DUP|DUP/CDT1|Dmel\CG8171|Dup|anon-WO0257455.31|cdt1|cdt1/dup|fs(2)51Fa|fs(2)PA77|fs(2)ltoPA77|l(2)51Ec|l(2)k03308	double parked	protein-coding
6804	chr3L	5748801	5749060	+	0	NA	3' UTR (NM_001104049, exon 35 of 35)	3' UTR (NM_001104049, exon 35 of 35)	3259	NM_079212	38643	Dm.2839	NM_079212		DnaJ-1	CG10578|DNAJ-1|DNAJ1|DROJ1|DmHsp40|Dmel\CG10578|DnaJ1|DnaJ1 64EF|DroJ1|EU3500|HSP40|HSP40/HDJ1|Hdj1|Hsp-40|Hsp40|anon-WO0140519.166|anon-WO0172774.135|dHDJ1|dHDJ1/HSP40|dHdj1|dhdJ1|dhdj-1|dhdj1|dnaJ-1|droj1|hsp40	DnaJ-like-1	protein-coding
13476	chr4	661611	662180	+	0	NA	5' UTR (NM_166783, exon 2 of 11)	5' UTR (NM_166783, exon 2 of 11)	1208	NM_166783	43808	Dm.1403	NM_166780		gw	CG11484|CG31992|CG9905|Dmel\CG31992|GQ182|GW|GW182|Gw|Gw182|anon-EST:Posey205|dGW182|gw182	gawky	protein-coding
11126	chr3R	14722241	14722610	+	0	NA	intron (NM_001300400, intron 1 of 8)	intron (NM_001300400, intron 1 of 8)	1836	NM_001038966	41783		NM_001038966		kibra	CG12600|CG33967|CG7552|DmKibra|Dmel\CG33967|Kib|Kibra|ORE-2|RE26350|kbr|kib|l(3)02404|l(3)j5C3|l(3)neo42	kibra	protein-coding
7594	chr3L	12432681	12432940	+	0	NA	promoter-TSS (NM_079317)	promoter-TSS (NM_079317)	-142	NM_079317	39418	Dm.941	NM_079317		toe	CG10704|Dmel\CG10704|Toe|anon-WO0172774.89	twin of eyg	protein-coding
4330	chr2R	12455581	12455830	+	0	NA	intron (NM_078989, intron 1 of 1)	intron (NM_078989, intron 1 of 1)	2515	NM_078989	36363	Dm.4470	NM_078989		Lac	CG12369|CT24921|Dmel\CG12369|bulb|l(2)k11012|l(2)k11012b|lac	Lachesin	protein-coding
12073	chr3R	21640241	21643310	+	0	NA	intron (NM_001300526, intron 2 of 7)	intron (NM_001300526, intron 2 of 7)	3123	NR_133432	26067374		NR_133432		CR46056	Dmel\CR46056	ncRNA	ncRNA
12612	chr3R	25803731	25804120	+	0	NA	Intergenic	Intergenic	-2520	NM_001043293	4379865	Dm.28450	NM_001043293		BG642167	1a8|BG642167(1a8)|CG34103|Dmel\CG34103|anon-SAGE:Wang-011	BG642167	protein-coding
13253	chr3R	31621731	31622090	+	0	NA	promoter-TSS (NM_143623)	promoter-TSS (NM_143623)	-226	NM_001276222	43729	Dm.24119	NM_143623		kek6	CG1804|Dmel\CG1804	kek6	protein-coding
2425	chr2L	19159571	19160170	+	0	NA	promoter-TSS (NR_124379)	promoter-TSS (NR_124379)	-571	NR_124379	19836046		NR_124379		CR44977	Dmel\CR44977	ncRNA	ncRNA
4453	chr2R	13151891	13152840	+	0	NA	TTS (NM_165966)	TTS (NM_165966)	312	NM_001274006	36442	Dm.4488	NM_057738		Ack-like	CG33007|CG3969|CG43741|DPR2|DRODPR2|DmHD-11|Dmel\CG43741|Dmel_CG33007|Dmel_CG3969|HD-11|PR2|PR2/ACK|Rp2|dACK	Activated Cdc42 kinase-like	protein-coding
11980	chr3R	21314561	21314830	+	0	NA	non-coding (NR_074035, exon 1 of 1)	non-coding (NR_074035, exon 1 of 1)	-2021	NR_048446	12798499	Dm.7182	NR_048446		mir-4951	CR43522|Dmel\CR43522|dme-mir-4951	mir-4951 stem loop	ncRNA
1883	chr2L	14431451	14431960	+	0	NA	promoter-TSS (NR_124254)	promoter-TSS (NR_124254)	-883	NR_124254	19835519		NR_124254		CR44732	Dmel\CR44732|lincRNA.132	ncRNA	ncRNA
4276	chr2R	12038811	12039210	+	0	NA	promoter-TSS (NM_078982)	promoter-TSS (NM_078982)	-31	NM_078982	36289		NM_078982		RpIII128	CG8344|DmRP128|Dmel\CG8344|RP128	RNA polymerase III 128kD subunit	protein-coding
7757	chr3L	13460471	13460720	+	0	NA	exon (NM_168547, exon 2 of 15)	exon (NM_168547, exon 2 of 15)	-3357	NM_140395	39515	Dm.1612	NM_140395		CG10116	Dmel\CG10116	uncharacterized protein	protein-coding
6411	chr3L	2265651	2266180	+	0	NA	promoter-TSS (NM_139451)	promoter-TSS (NM_139451)	-58	NM_139450	38291	Dm.4588	NM_139450		ecd	CG5714|Dmel\CG5714|Ed|ecd-1|ecd1|ecdl|l(3)62Db|l(3)ecd|l(3)ecd-1|l(3)ecd1	ecdysoneless	protein-coding
12842	chr3R	28372071	28372330	+	0	NA	Intergenic	Intergenic	19958	NM_079816	43375		NM_079816		Or98b	98C.1|98b|CG1867|DOR121|Dmel\CG1867|Or98bP|or98b	Odorant receptor 98b	protein-coding
91	chr2L	478631	480630	+	0	NA	promoter-TSS (NM_001272903)	promoter-TSS (NM_001272903)	58	NM_164384	33224	Dm.6739	NM_134685		cbt	CG4427|Cabot|Cabut|Dmel\CG4427|EP(2)2237|EP2237|dTIEG	cabut	protein-coding
2894	chr2L	22368421	22368670	+	0	NA	3' UTR (NM_165415, exon 8 of 8)	3' UTR (NM_165415, exon 8 of 8)	14190	NM_001259204	49895	Dm.20928	NM_165413		CG17018	BcDNA:RE40762|CG17410|Dmel\CG17018	uncharacterized protein	protein-coding
13039	chr3R	29858721	29859190	+	0	NA	promoter-TSS (NM_143481)	promoter-TSS (NM_143481)	-19	NM_143481	43530	Dm.14945	NM_143481		CG7824	Dmel\CG7824	CG7824	protein-coding
8749	chr3L	20511981	20512370	+	0	NA	exon (NM_168863, exon 2 of 4)	exon (NM_168863, exon 2 of 4)	2275	NM_168862	40273	Dm.1016	NM_168860		CG32425	CG15869|CG5100|Dmel\CG32425	uncharacterized protein	protein-coding
12169	chr3R	22484491	22484830	+	0	NA	TTS (NM_001170216)	TTS (NM_001170216)	-2379	NM_001170217	42647	Dm.4526	NM_142796		Pfdn5	CG7048|Dmel\CG7048|pfdn5	Prefoldin 5	protein-coding
205	chr2L	1395641	1396730	+	0	NA	intron (NM_080531, intron 2 of 13)	intron (NM_080531, intron 2 of 13)	-14859	NR_124018	19835193		NR_124018		CR44898	Dmel\CR44898	ncRNA	ncRNA
14001	chrX	2684391	2684850	+	0	NA	promoter-TSS (NM_001272265)	promoter-TSS (NM_001272265)	-775	NR_123780	19835100		NR_123780		CR44470	Dmel\CR44470|lincRNA.938	ncRNA	ncRNA
13387	chr4	260071	260440	+	0	NA	intron (NM_001258487, intron 5 of 11)	intron (NM_001258487, intron 5 of 11)	5258	NM_001258487	43781		NM_143657		RhoGAP102A	BP1050|CG1748|CG34013|CG42316|Dm_4:1183|Dmel\CG42316|Dmel_CG1748|Dmel_CG34013|mlncRNA102B1|rhoGAP102A	Rho GTPase activating protein at 102A	protein-coding
28	chr2L	111701	112380	+	0	NA	TTS (NM_001258885)	TTS (NM_001258885)	2446	NM_164362	48552	Dm.7020	NM_080184		Sam-S	CG2674|Dmel\CG2674|M(2)21A-B|M(2)21AB|METK|SamS|Sams|Su(z)5|m(2)21ab	S-adenosylmethionine Synthetase	protein-coding
12202	chr3R	22745431	22745730	+	0	NA	promoter-TSS (NM_142836)	promoter-TSS (NM_142836)	1	NM_142835	42695	Dm.1284	NM_142835		vret	CG4771|Dmel\CG4771	vreteno	protein-coding
2322	chr2L	18612151	18612460	+	0	NA	promoter-TSS (NM_136045)	promoter-TSS (NM_136045)	-56	NM_136045	35113	Dm.12150	NM_136045		Atac2	CG10414|Dmel\CG10414|KAT14|dATAC2	Ada2a-containing complex component 2	protein-coding
1810	chr2L	13834721	13835710	+	0	NA	promoter-TSS (NM_165067)	promoter-TSS (NM_165067)	-143	NM_165065	318977		NM_165065		mRpS23	CG31842|Dmel\CG31842|l(2)SH0272|l(2)SH2 0272	mitochondrial ribosomal protein S23	protein-coding
13667	chrX	576901	577440	+	0	NA	3' UTR (NM_057278, exon 12 of 12)	3' UTR (NM_057278, exon 12 of 12)	-4951	NM_001042788	31003		NM_057438		vnd	CG6172|Dm vnd|Dm-NK2|Dmel\CG6172|EC6|EG:118B3.1|HDC16822|NK-2|NK2|Nkx2|VND|Vnd|dNK-2|l(1)1Bf|l(1)EA142|l(1)EC6|l(1)GA100|l(1)GA122|l(1)RC24|l(1)VA208|l(1)VE769|lab|nk-2|vnd/NK-2	ventral nervous system defective	protein-coding
11365	chr3R	16548941	16549440	+	0	NA	intron (NM_001202305, intron 2 of 17)	intron (NM_001202305, intron 2 of 17)	-21774	NR_133408	26067349		NR_133408		CR46030	Dmel\CR46030	ncRNA	ncRNA
14630	chrX	7626871	7627560	+	0	NA	intron (NM_080025, intron 1 of 6)	intron (NM_080025, intron 1 of 6)	-5007	NM_001258636	44540	Dm.1827	NM_080025		ct	BcDNA:GH10590|CG11387|CT|CUT|Ct|Cut|Dmel\CG11387|kf|l(1)7Ba|l(1)7Bb|l(1)VE614	cut	protein-coding
15178	chrX	11892871	11894170	+	0	NA	promoter-TSS (NM_132538)	promoter-TSS (NM_132538)	-423	NM_001298214	32152	Dm.6637	NM_132538		wisp	CG15737|DmCG15737|Dmel\CG15737|TAMP|Wisp|fs(1)M19	wispy	protein-coding
13660	chrX	510471	510850	+	0	NA	3' UTR (NM_001258518, exon 3 of 3)	3' UTR (NM_001258518, exon 3 of 3)	1225	NM_080136	46717	Dm.10614	NM_080136		arg	Arg|CG18104|Dmel\CG18104|EG:171D11.4|EG:65F1.3	arginase	protein-coding
4829	chr2R	15921201	15921580	+	0	NA	intron (NM_057381, intron 1 of 20)	intron (NM_057381, intron 1 of 20)	728	NM_001103863	36746	Dm.4729	NM_057379		sli	CG33464|CG43758|CG8355|CT21700|CT37068|Dmel\CG43758|Dmel_CG33464|Dmel_CG8355|Sli|Slit|dSlit|fus3|l(2)05248|wdh	slit	protein-coding
2311	chr2L	18502681	18502930	+	0	NA	intron (NM_001273610, intron 1 of 11)	intron (NM_001273610, intron 1 of 11)	1173	NM_136037	35104	Dm.454	NM_136037		kon	CG10275|CT28869|Dmel\CG10275|Kon|perd	kon-tiki	protein-coding
1362	chr2L	10237811	10238470	+	0	NA	5' UTR (NM_164897, exon 1 of 7)	5' UTR (NM_164897, exon 1 of 7)	177	NM_164897	318914	Dm.23799	NM_164896		mthl15	CG31720|Dmel\CG31720	methuselah-like 15	protein-coding
10343	chr3R	8840301	8841510	+	0	NA	intron (NM_001260069, intron 3 of 13)	intron (NM_001260069, intron 3 of 13)	5384	NM_169246	41062	Dm.7093	NM_057349		pyd	CG11782|CG11962|CG12409|CG31349|CG43140|CG9729|CG9731|CG9763|CT36877|DZO-1|Dmel\CG43140|Dmel_CG31349|Dmel_CG9731|Pch|Pyd|Pyd/ZO-1|Tamou|ZO-1|ZO1|dzo-1|pyd(Z01)|tam|xvt	polychaetoid	protein-coding
4596	chr2R	14170151	14170810	+	0	NA	promoter-TSS (NM_137092)	promoter-TSS (NM_137092)	18	NM_137092	36569	Dm.617	NM_137092		CG8331	CT24597|Dmel\CG8331	CG8331	protein-coding
14688	chrX	8041261	8041730	+	0	NA	exon (NM_001272392, exon 9 of 11)	exon (NM_001272392, exon 9 of 11)	-3978	NM_132205	31721	Dm.4271	NM_132205		CG2233	Dmel\CG2233	CG2233	protein-coding
2766	chr2L	21524151	21525200	+	0	NA	TTS (NM_001032195).2	TTS (NM_001032195).2	251	NM_001032211	3771854	Dm.30223	NM_001032211		His4:CG33869	CG33869|Dmel\CG33869	histone H4	protein-coding
2826	chr2L	21828181	21829580	+	0	NA	5' UTR (NM_078891, exon 1 of 3)	5' UTR (NM_078891, exon 1 of 3)	287	NM_078891	35430	Dm.6988	NM_078891		tsh	CG1374|Dmel\CG1374|T shirt|Tsh|ae|ae[l]|l(2)04319|l(2)B4-2-12	teashirt	protein-coding
5785	chr2R	23205761	23206370	+	0	NA	Intergenic	Intergenic	-2092	NM_137923	37679	Dm.22333	NM_137921		CG34371	34371|CG13546|CG13547|CG13548|CG30188|CT32921|CT32922|Dmel\CG34371|Dmel_CG13548|Dmel_CG30188	uncharacterized protein	protein-coding
174	chr2L	1067781	1069000	+	0	NA	intron (NM_164403, intron 1 of 4)	intron (NM_164403, intron 1 of 4)	9421	NM_164403	33281	Dm.251	NM_078726		S	CG4385|Dmel\CG4385|E(Raf)2B|EC2-2|EK2-2|ES2-4|EY2-4|Star/asteroid|fltr|l(2)05671|l(2)07056|l(2)21Eb|l(2)c00080|l(2)k09538|l(2)rK134|star	Star	protein-coding
10126	chr3R	7123771	7125280	+	0	NA	promoter-TSS (NM_169171)	promoter-TSS (NM_169171)	-23	NM_141437	40851	Dm.20767	NM_141437		CG10098	Dmel\CG10098	uncharacterized protein	protein-coding
7210	chr3L	9329831	9330080	+	0	NA	Intergenic	Intergenic	-4377	NM_206305	39062	Dm.3478	NM_206304		PGRP-LA	CG18614|CG32042|CG4361|CG4384|Dmel\CG32042|PGRPLA|pgrp-la	Peptidoglycan recognition protein LA	protein-coding
14235	chrX	4589711	4590700	+	0	NA	intron (NR_123790, intron 1 of 4)	intron (NR_123790, intron 1 of 4)	-18276	NM_131945	31390	Dm.25180	NM_131945		CG12684	Dmel\CG12684	uncharacterized protein	protein-coding
1428	chr2L	10517111	10517680	+	0	NA	promoter-TSS (NM_001169469)	promoter-TSS (NM_001169469)	60	NM_001273426	34449	Dm.2776	NM_078815		Lrr47	CG6098|CT19173|Dmel\CG6098|LRR47|Lrr-47	Leucine-rich repeat 47	protein-coding
9493	chr3R	2026071	2026400	+	0	NA	intron (NM_001316563, intron 16 of 21)	BS3_DM|LINE|Jockey	-160227	NR_133318	26067438		NR_133318		CR46122	Dmel\CR46122	ncRNA	ncRNA
2026	chr2L	15643861	15644240	+	0	NA	TTS (NM_001273537)	TTS (NM_001273537)	13967	NM_135917	34920	Dm.3555	NM_135917		CG18480	BG:DS07108.4|BcDNA:LP11031|CT42128|Dmel\CG18480	uncharacterized protein	protein-coding
1878	chr2L	14379611	14379950	+	0	NA	exon (NM_057884, exon 4 of 7)	exon (NM_057884, exon 4 of 7)	1392	NM_057884	34843	Dm.2958	NM_057884		ppk	BG:DS06238.1|CG3478|Dmel\CG3478|PPK|PPK1|dmdNaC1|dmdNaCl|mdNaC1|pkt|ppk1	pickpocket	protein-coding
12682	chr3R	26633891	26634680	+	0	NA	promoter-TSS (NM_170282)	promoter-TSS (NM_170282)	553	NM_143233	43208	Dm.6372	NM_143233		TwdlH	CG14241|CG31080|Dmel\CG31080	TweedleH	protein-coding
4465	chr2R	13220031	13220480	+	0	NA	promoter-TSS (NM_144126)	promoter-TSS (NM_144126)	-4	NM_001299453	36459		NM_137004		CG4646	BcDNA:SD14289|Dmel\CG4646	CG4646	protein-coding
15635	chrX	15944491	15945720	+	0	NA	TTS (NM_132863)	TTS (NM_132863)	127	NM_132864	32558	Dm.10807	NM_132864		Rrp47	CG8928|Dmel\CG8928|dRrp47|lincRNA.1007	Ribosomal RNA processing 47	protein-coding
2076	chr2L	16175761	16176250	+	0	NA	exon (NM_001273556, exon 10 of 33)	exon (NM_001273556, exon 10 of 33)	3183	NR_073789	14462784		NR_073789		CR43806	Dmel\CR43806	ncRNA	ncRNA
9523	chr3R	2254551	2254920	+	0	NA	intron (NM_001316563, intron 17 of 21)	Copia_LTR|LTR|Copia	-388727	NR_133318	26067438		NR_133318		CR46122	Dmel\CR46122	ncRNA	ncRNA
4147	chr2R	11279471	11280250	+	0	NA	promoter-TSS (NM_136818)	promoter-TSS (NM_136818)	135	NM_080247	53433	Dm.20362	NM_080247		Vhl	BcDNA:RH61560|CG13221|DVhl|Dmel\CG13221|Dvhl|VHL|d-VHL|d-vhl|dVHL|dmVHL|vhl	von Hippel-Lindau	protein-coding
11454	chr3R	16891591	16893020	+	0	NA	promoter-TSS (NR_074020)	promoter-TSS (NR_074020)	-105	NR_048422	12798433		NR_048422		CR43617	Dm_3R:69251|Dmel\CR43617	ncRNA	ncRNA
3913	chr2R	9868551	9869130	+	0	NA	intron (NR_124491, intron 2 of 3)	intron (NR_124491, intron 2 of 3)	621	NR_124492	19834969		NR_124491		CR45138	Dmel\CR45138	ncRNA	ncRNA
3697	chr2R	8187441	8187750	+	0	NA	intron (NM_001273871, intron 2 of 22)	intron (NM_001273871, intron 2 of 22)	13430	NM_176104	35799		NM_176104		LRP1	CG30368|CG33087|CG8706|CT9297|Dm CG33087|Dmel\CG33087|LDLR|lrp1	LDL receptor protein 1	protein-coding
4921	chr2R	16580541	16581100	+	0	NA	promoter-TSS (NM_001299564)	promoter-TSS (NM_001299564)	-13	NM_001299564	36854	Dm.4855	NM_057848		Cdk4	8-6|CDK4|CDK4/6|CG5072|Cdk4/6|DmCdk4|Dmel\CG5072|Pk53C|Pk?7|cdk|cdk4|cdk4/6|dCdk4|l(2)05428|l(2)0671|l(2)k06503|l(2)s4639|l(2)sh0671	Cyclin-dependent kinase 4	protein-coding
12753	chr3R	27334681	27335300	+	0	NA	Intergenic	Intergenic	-4108	NM_143301	43296		NM_143301		CG3330	Dmel\CG3330|anon-WO0140519.147	CG3330	protein-coding
12280	chr3R	23294991	23296030	+	0	NA	promoter-TSS (NM_170070)	promoter-TSS (NM_170070)	-272	NM_001275943	42757	Dm.2370	NM_079737		pnt	0123/09|0608/07|0998/12|3520|CG17077|D-Ets-2|D-ets-2|DMPOINT1A|Dmel\CG17077|E(E2F)3D|EC3-2|EK3-2|ETS2|EY3-1|Ets|Ets2|Ets58AB|Ets94F|PNT-P1|PNTP1|PNTP2|POINT|Pnt|Pnt-P1|Pnt2|PntP1|PntP2|Pointed-P1|ets94F|l(3)07825|l(3)j1B7|l(3)s118306|png|pnt-P1|pnt-P2|pntP2|pntegfr|pointed-RC|ptd	pointed	protein-coding
15050	chrX	10898561	10899570	+	0	NA	promoter-TSS (NM_001298170)	promoter-TSS (NM_001298170)	178	NM_001298169	32021	Dm.11248	NM_132435		CG1582	Dmel\CG1582|cg1582	CG1582	protein-coding
13811	chrX	1531201	1531500	+	0	NA	intron (NM_001201595, intron 7 of 7)	CpG	18280	NM_130570	31110	Dm.15	NM_130570		inc	CG14783|CG14784|CG32810|Dmel\CG32810|EG:196F3.2|ins	insomniac	protein-coding
11167	chr3R	15225341	15225890	+	0	NA	promoter-TSS (NM_001170146)	promoter-TSS (NM_001170146)	39	NM_079630	41836	Dm.1657	NM_079630		Caf1-55	154659_at|55|CAF-1|CAF1|CAF1-55|CAF1-p55|CAF1p55|CG4236|Caf-1|Caf1|Caf1 (p55)|Caf1/p55|Caf1p55|Dmel\CG4236|MSI1/RbAp48/CAC3/LIN-53|NURF|NURF 55|NURF-55|NURF55|Nurf|Nurf 55|Nurf-55|Nurf55|P55|RBAP48|RbAp46/48|RbAp48|S(ls)3|caf-1|caf1|caf1 p55|d-CAF1|dCAF-1|dCAF-1 p55|dCAF-1-p55|dCAF1|dCAF1-p55|dNURF|p55|p55 CAF1|p55/NURF-55|p55CAF1	Chromatin assembly factor 1, p55 subunit	protein-coding
15270	chrX	12705631	12706460	+	0	NA	5' UTR (NM_132595, exon 1 of 2)	5' UTR (NM_132595, exon 1 of 2)	191	NM_132595	32224		NM_132595		CG15725	Dmel\CG15725	uncharacterized protein	protein-coding
13408	chr4	340291	340690	+	0	NA	intron (NM_001201587, intron 16 of 17)	DNAREP1_DM|RC|Helitron	18167	NM_001201589	43787	Dm.3785	NM_166754		PMCA	BEST:CK|BEST:CK01140|BEST:CK02288|BP1021|CG2165|CG34036|CG42314|CK02288|Dmel\CG42314|Dmel_CG2165|Dmel_CG34036	plasma membrane calcium ATPase	protein-coding
10153	chr3R	7472771	7474120	+	0	NA	promoter-TSS (NR_001999)	promoter-TSS (NR_001999)	-223	NR_001999	3772530	Dm.34215	NR_001999		scaRNA:MeU5-C46	CG31504|CR32863|Dmel\CR32863|MeU5-C46(U85)|U85|U85 scaRNA|U85scaRNA|chr3R:3298692..3298881|dU85|snoRNA:MeU5-C46|snoRNA:U85	small Cajal body-specific RNA : MeU5-C46	ncRNA
14622	chrX	7549651	7550080	+	0	NA	Intergenic	Intergenic	-1873	NM_167128	318169		NM_167128		CG32719	Dmel\CG32719	uncharacterized protein	protein-coding
1478	chr2L	10976341	10976620	+	0	NA	promoter-TSS (NM_001042889)	promoter-TSS (NM_001042889)	-81	NM_001042888	46069	Dm.7708	NM_143778		ATPsynG	ATPN|BcDNA:RE20862|BcDNA:RH28372|CG6105|Dmel\CG6105|I(2)06225|anon-EST:Posey10|l(2)06225	ATP synthase	protein-coding
11654	chr3R	18595161	18595550	+	0	NA	exon (NM_001144608, exon 4 of 8)	exon (NM_001144608, exon 4 of 8)	-3336	NM_169825	42233	Dm.7504	NM_142475		CG14305	Dmel\CG14305	uncharacterized protein	protein-coding
7270	chr3L	9783521	9784330	+	0	NA	exon (NM_206314, exon 10 of 13)	exon (NM_206314, exon 10 of 13)	-3121	NM_001316482	326184		NM_168375		CG32052	BEST:HL01355|CG8163|Dmel\CG32052|Smase|aSMase	uncharacterized protein	protein-coding
15581	chrX	15678791	15679170	+	0	NA	Intergenic	Intergenic	3504	NM_167455	32502	Dm.11700	NM_167455		CG12708	Dmel\CG12708	uncharacterized protein	protein-coding
394	chr2L	3035321	3035570	+	0	NA	promoter-TSS (NM_001273052)	promoter-TSS (NM_001273052)	-97	NM_134898	33517	Dm.21778	NM_134898		CG17258	Dmel\CG17258	uncharacterized protein	protein-coding
4769	chr2R	15571211	15571580	+	0	NA	promoter-TSS (NM_166103)	promoter-TSS (NM_166103)	22	NM_057732	36727	Dm.640	NM_057732		Cdk5	CDK5|CG8203|DmCdk5|Dmel\CG8203|cdk5	Cyclin-dependent kinase 5	protein-coding
11247	chr3R	15810401	15811020	+	0	NA	TTS (NR_125172)	TTS (NR_125172)	117	NM_001275685	41913	Dm.3115	NM_142237		alpha-Man-IIb	CG4606|DM-GII.2|Dmel\CG4606|GM|GTD#24/1|Man'ase|ManIIb|alpha-M-II|alpha-Man-II b|dGMIIb	alpha-Mannosidase class II b	protein-coding
15436	chrX	14221181	14221580	+	0	NA	intron (NM_167396, intron 1 of 2)	intron (NM_167396, intron 1 of 2)	4499	NM_132720	32374	Dm.31096	NM_132720		CG11674	Dmel\CG11674	uncharacterized protein	protein-coding
1720	chr2L	13004041	13004870	+	0	NA	promoter-TSS (NM_001273498)	promoter-TSS (NM_001273498)	-25	NM_001273498	47396	Dm.1502	NM_080152		Tor	5092|CG5092|CT16317|CT24745|CT24817|DmTOR|Dmel\CG5092|FRAP/TOR|TOR|TORC1|Torc1|Tor|TOR|dTOR|dTor|dtor|l(2)k17004|mTOR|mTor|tor	Target of rapamycin	protein-coding
5137	chr2R	18287941	18288210	+	0	NA	promoter-TSS (NM_001169721)	promoter-TSS (NM_001169721)	-621	NM_001169721	37092	Dm.684	NM_137467		CG14502	Dmel\CG14502	uncharacterized protein	protein-coding
3777	chr2R	8984261	8984570	+	0	NA	intron (NM_001299292, intron 1 of 6)	intron (NM_001299292, intron 1 of 6)	1160	NM_001144150	35902	Dm.537	NM_136591		CG8213	Dmel\CG8213|SP44|c-SP44	CG8213	protein-coding
12491	chr3R	24899391	24899910	+	0	NA	exon (NM_143996, exon 6 of 6)	exon (NM_143996, exon 6 of 6)	-1466	NM_143052	42978	Dm.4999	NM_143052		CG10845	Dmel\CG10845|KIF26A/B|Klp96B	uncharacterized protein	protein-coding
13945	chrX	2407721	2409280	+	0	NA	TTS (NM_130647)	TTS (NM_130647)	2401	NM_130647	31226	Dm.5407	NM_130647		CG12496	Dmel\CG12496|EG:BACH7M4.4	uncharacterized protein	protein-coding
6501	chr3L	3059841	3060780	+	0	NA	intron (NM_139508, intron 1 of 7)	(ACAGCA)n|Simple_repeat|Simple_repeat	5231	NM_139507	38365	Dm.829	NM_139507		CG16753	Dmel\CG16753	uncharacterized protein	protein-coding
15486	chrX	14950231	14951510	+	0	NA	promoter-TSS (NM_132760)	promoter-TSS (NM_132760)	-121	NM_132760	32426	Dm.3171	NM_132760		pdgy	BcDNA:GH02901|CG9009|Dmel\CG9009	pudgy	protein-coding
5356	chr2R	20032031	20032840	+	0	NA	Intergenic	Intergenic	-15340	NR_124641	19835251		NR_124641		CR44630	Dmel\CR44630	ncRNA	ncRNA
9022	chr3L	22419131	22419460	+	0	NA	Intergenic	Intergenic	1905	NR_125041	19835143		NR_125041		CR45237	Dmel\CR45237	ncRNA	ncRNA
1509	chr2L	11179011	11179260	+	0	NA	5' UTR (NM_135655, exon 1 of 1)	5' UTR (NM_135655, exon 1 of 1)	103	NM_135655	34559	Dm.10751	NM_135655		CG4788	Dmel\CG4788	CG4788	protein-coding
5640	chr2R	22221621	22221880	+	0	NA	promoter-TSS (NM_137813)	promoter-TSS (NM_137813)	-845	NM_137813	37543	Dm.33348	NM_137813		Oatp58Da	CG30277|CG3387|Dmel\CG30277|oatp 58Da	Organic anion transporting polypeptide 58Da	protein-coding
7649	chr3L	12681141	12682030	+	0	NA	Intergenic	Intergenic	-12054	NM_001274849	39441		NM_079323		mirr	CG10601|DH1|De1|De3|Dmel\CG10601|Group F|IRO-C|Iro|Iro-C|IroC|MIRR|Mirr|Mrr|Sai|cre|crep|group F|iro|iro-C|l(3)69Ca|l(3)69Da|l(3)6D1|l(3)A5-3-42|mir|mrr	mirror	protein-coding
15908	chrX	17834401	17834690	+	0	NA	intron (NM_001298462, intron 1 of 4)	intron (NM_001298462, intron 1 of 4)	-3451	NR_123934	19835282		NR_123934		CR44691	Dmel\CR44691|lincRNA.1010	ncRNA	ncRNA
5228	chr2R	18977251	18977700	+	0	NA	promoter-TSS (NM_001202045)	promoter-TSS (NM_001202045)	-39	NM_001202045	37189	Dm.15890	NM_001202045		CG18605	Dmel\CG18605	uncharacterized protein	protein-coding
243	chr2L	1634591	1635000	+	0	NA	Intergenic	(TATATG)n|Simple_repeat|Simple_repeat	-8774	NR_124020	19835151		NR_124020		CR44603	Dmel\CR44603|lincRNA.10	ncRNA	ncRNA
12966	chr3R	29457431	29458700	+	0	NA	TTS (NR_074064)	TTS (NR_074064)	495	NM_206579	43469	Dm.4029	NM_057468		Ptp99A	CG11515|CG11516|CG11517|CG2005|CT6383|DPTP99A|DPTP[[99A]]|Dmel\CG11516|PTP99A|R-PTP 99A|dptp99A|ptp99A	Protein tyrosine phosphatase 99A	protein-coding
9014	chr3L	22364221	22364530	+	0	NA	intron (NR_133305, intron 1 of 1)	intron (NR_133305, intron 1 of 1)	-3507	NR_133307	26067292		NR_133307		CR45965	Dmel\CR45965	ncRNA	ncRNA
4842	chr2R	16002171	16002820	+	0	NA	exon (NM_137229, exon 1 of 3)	exon (NM_137229, exon 1 of 3)	734	NM_001299542	36761	Dm.641	NM_137229		CG8370	Dmel\CG8370	CG8370	protein-coding
13871	chrX	1962831	1963410	+	0	NA	intron (NM_001272227, intron 3 of 11)	intron (NM_001272227, intron 3 of 11)	21180	NM_001272230	31162	Dm.17760	NM_001038734		Hr4	CG16902|CG3600|CG42527|CG43692|CG43934|DHR4|Dmel\CG43934|Dmel_CG16902|Dmel_CG3600|Dmel_CG42527|EG:133E12.2|EG:BACH61I5.1|EP(X)1232|EP1232|GRF|NR6A2|null	Hormone receptor 4	protein-coding
8711	chr3L	20282231	20282890	+	0	NA	intron (NM_140943, intron 1 of 9)	intron (NM_140943, intron 1 of 9)	-7225	NM_170639	40226	Dm.5125	NM_170639		CG17122	Dmel\CG17122	uncharacterized protein	protein-coding
3858	chr2R	9441211	9442170	+	0	NA	promoter-TSS (NM_165676)	promoter-TSS (NM_165676)	-124	NM_165676	35971	Dm.7305	NM_136644		ced-6	CG11804|Ced-6|Dmel\CG11804|ced6|dCed-6|dced-6|drCed-6|drced-6	ced-6	protein-coding
9326	chr3L	26456661	26456970	+	0	NA	Intergenic	QUASIMODO_I-int|LTR|Gypsy	-85459	NM_001170386	8674042		NM_001170386		CG42598	Dmel\CG42598	uncharacterized protein	protein-coding
13166	chr3R	30774051	30774320	+	0	NA	exon (NM_170522, exon 3 of 5)	exon (NM_170522, exon 3 of 5)	8259	NM_057502	43650	Dm.4708	NM_057502		zfh1	CG1322|Dmel\CG1322|ZFH-1|ZFH1|Zfh-1|Zfh1|Zfh1a|l(3)00865|zfh-1|zfl-1|zhf1	Zn finger homeodomain 1	protein-coding
13605	chrX	141941	142480	+	0	NA	promoter-TSS (NM_001297799)	promoter-TSS (NM_001297799)	2	NM_001297801	3354987	Dm.3352	NM_001031861		tyn	CG17131|CG17131-ORFA|CG17131-ORFB|Dmel\CG17131|SP71	trynity	protein-coding
7681	chr3L	12857471	12857740	+	0	NA	TTS (NM_140351)	TTS (NM_140351)	3700	NM_001274860	317856		NM_168526		CG32107	Dmel\CG32107	uncharacterized protein	protein-coding
15994	chrX	18534351	18534770	+	0	NA	promoter-TSS (NM_001272758)	promoter-TSS (NM_001272758)	-103	NM_001272758	32846	Dm.2877	NM_078678		Bx	Bd|CG10548|CG15048|CG44425|CG6500|DLMO|Dlmo|Dmel\CG44425|Dmel_CG15048|Dmel_CG6500|LMO|Lmo|Ptd|Rho|beadex/dLMO|dLMO|dLmo|dlmo|dttg|fliH|hdp|hdp-a|hld	Beadex	protein-coding
237	chr2L	1533101	1533350	+	0	NA	Intergenic	Intergenic	10528	NM_058077	33336	Dm.4820	NM_058077		Or22b	22A.2|22b|AN12|CG4231|DOR22A.2|DOR22b|DOR67|Dmel\CG4231|Dor67|OR22b|Or22|Or22A.2|Or22a/b|Or67|dOr22b|dor67|or22b	Odorant receptor 22b	protein-coding
11424	chr3R	16802531	16803190	+	0	NA	TTS (NR_125188)	TTS (NR_125188)	1561	NR_125188	19836031		NR_125188		CR45751	Dmel\CR45751	ncRNA	ncRNA
9589	chr3R	3587951	3588530	+	0	NA	Intergenic	PROTOP|DNA|P	-1186	NM_001110982	3355109	Dm.7847	NM_001110982		Parp	BEST:LD21673|CG17685|CG17696|CG17718|CG40411|D.PARP|Dm.pARTa|Dmel\CG40411|LD21673.3prime|PARP|PARP-1|PARP1|Parp1|dPARP|dmparp|parp	Poly-(ADP-ribose) polymerase	protein-coding
16014	chrX	18660051	18660560	+	0	NA	TTS (NM_133090)	TTS (NM_133090)	1848	NM_133090	32856		NM_133090		CG6696	Dmel\CG6696	CG6696	protein-coding
11369	chr3R	16561001	16561250	+	0	NA	intron (NM_001275711, intron 8 of 11)	intron (NM_001275711, intron 8 of 11)	-10390	NM_142303	42013	Dm.4286	NM_142303		CG14891	Dmel\CG14891|FBXL13	uncharacterized protein	protein-coding
8926	chr3L	21710931	21711380	+	0	NA	Intergenic	(ATTCCC)n|Simple_repeat|Simple_repeat	-4790	NM_168935	40412	Dm.9812	NM_168935		CG32447	CG14571|CG7155|Dmel\CG32447|anon-WO0170980.76|anon-WO0170980.77	uncharacterized protein	protein-coding
8894	chr3L	21563881	21564150	+	0	NA	Intergenic	Intergenic	-1411	NM_141075	40394	Dm.1041	NM_141075		CG7634	Dmel\CG7634	CG7634	protein-coding
1818	chr2L	13868771	13869100	+	0	NA	intron (NM_165067, intron 1 of 7)	intron (NM_165067, intron 1 of 7)	-2245	NR_124242	19835034		NR_124242		CR44848	Dmel\CR44848	ncRNA	ncRNA
1675	chr2L	12579231	12579660	+	0	NA	Intergenic	Intergenic	-2000	NR_124223	19835990		NR_124223		CR44596	Dmel\CR44596|lincRNA.122	ncRNA	ncRNA
3502	chr2R	6949101	6949380	+	0	NA	promoter-TSS (NM_206043)	promoter-TSS (NM_206043)	-242	NM_206043	2768721	Dm.12821	NM_206043		CheB42a	CG15242|CG33348|CheB42A|Dmel\CG33348	Chemosensory protein B 42a	protein-coding
11388	chr3R	16654801	16655310	+	0	NA	intron (NM_080515, intron 1 of 5)	intron (NM_080515, intron 1 of 5)	607	NM_080515	42032	Dm.13706	NM_080515		modSP	CG10100|CG17557|CG31217|CT28389|Dm-SP|Dmel\CG31217|LDL|Ldlr|ModSP|SP172|SP53|Ser89E|W|X	modular serine protease	protein-coding
13309	chr3R	31975271	31975520	+	0	NA	intron (NM_001260469, intron 2 of 15)	intron (NM_001260469, intron 2 of 15)	-2726	NM_143646	43761	Dm.6475	NM_143646		CG2003	Dmel\CG2003	CG2003	protein-coding
9769	chr3R	4974571	4974990	+	0	NA	Intergenic	Intergenic	-7485	NR_048321	12798227		NR_048321		CR43478	Dmel\CR43478	ncRNA	ncRNA
10980	chr3R	13801651	13802240	+	0	NA	Intergenic	Intergenic	-11164	NM_001144578	7354381	Dm.29518	NM_001144578		tal-1A	CG42384|Dm1|Dmel\CG42384|ORF 1A|ORF1|Pep1|Tal1A|pri|tal	tarsal-less 1A	protein-coding
5810	chr2R	23523131	23524330	+	0	NA	promoter-TSS (NM_137959)	promoter-TSS (NM_137959)	-117	NM_079974	44172	Dm.1428	NM_079974		RabX1	AAF47018|CG3870|Chrw|DmRabX1|Dmel\CG3870|RAB5c|chr|chrw|l(2)k06908|rabX1	RabX1	protein-coding
8972	chr3L	21961231	21961510	+	0	NA	promoter-TSS (NR_125036)	promoter-TSS (NR_125036)	-501	NR_125036	19835084		NR_125036		CR45757	Dmel\CR45757	ncRNA	ncRNA
12939	chr3R	29252471	29253940	+	0	NA	exon (NM_079823, exon 2 of 2)	exon (NM_079823, exon 2 of 2)	2120	NM_079823	43466	Dm.3208	NM_079823		stg	0224/06|0245/03|0439/22|0730/13|0896/05|0967/05|0980/06|1083/13|1089/08|1143/02|5473|CDC25|CDC25[string]|CG1395|Cdc25|Cdc25[Stg]|Cdc25[String]|Cdc25[stg]|Cdc25[string]|Cdc25c|Dmel\CG1395|EP1213|S(rux)3A|STG|SY3-4|Stg|String/Cdc25|anon-EST:Liang-2.21|cdc25|cdc25[string]|clone 2.21|l(3)01235|l(3)j10B9|l(3)j1D3|l(3)j1E3|l(3)j3D1|l(3)s2213|st|stg[cdc25]|str/cdc25	string	protein-coding
14602	chrX	7323711	7325150	+	0	NA	promoter-TSS (NM_132162)	promoter-TSS (NM_132162)	216	NM_132163	31667	Dm.3611	NM_132163		Dok	CG2079|Ddok|Dmel\CG2079|l(1)G0331	Downstream of kinase	protein-coding
11987	chr3R	21339341	21340160	+	0	NA	intron (NM_001300512, intron 2 of 14)	intron (NM_001300512, intron 2 of 14)	9851	NM_001300512	42531	Dm.33570	NM_142710		CG16791	Dmel\CG16791|R5_3R:17143989..17145881|anon-WO0172774.78	uncharacterized protein	protein-coding
10377	chr3R	8975771	8976670	+	0	NA	Intergenic	Intergenic	-4640	NM_001300313	41070		NM_141592		CAHbeta	CG11967|DmBCA|Dmel\CG11967|beta-CA	Carbonic anhydrase beta	protein-coding
10606	chr3R	10599111	10600670	+	0	NA	intron (NM_057228, intron 3 of 13)	intron (NM_057228, intron 3 of 13)	14386	NM_057229	41273	Dm.2272	NM_057228		hth	1323/07|1422/04|CG17117|Dm-HTH|Dmel\CG17117|HTH|Hth|Meis1|P53|anon-EST:Liang-2.13|clone 2.13|dtl|hth1|hth2|l(3)05745|l(3)86Ca	homothorax	protein-coding
14928	chrX	9697301	9697550	+	0	NA	3' UTR (NM_078545, exon 2 of 2)	3' UTR (NM_078545, exon 2 of 2)	3239	NM_078545	31912	Dm.2928	NM_078545		btd	BTD|Btd|CG12653|Dmel\CG12653	buttonhead	protein-coding
14123	chrX	3811351	3811830	+	0	NA	promoter-TSS (NM_130722)	promoter-TSS (NM_130722)	-108	NM_130722	31339	Dm.17730	NM_130722		ec	CG2904|Dmel\CG2904|EG:EG0002.3|Ec|Q1W9Q0	echinus	protein-coding
9151	chr3L	23437641	23437980	+	0	NA	Intergenic	Gypsy2-LTR_DM|LTR|Gypsy	98484	NM_168989	317928	Dm.33502	NM_168988		ND-MLRQ	BEST:GH04411|BcDNA:RE56733|CG32230|Dmel\CG32230|NUML	NADH dehydrogenase (ubiquinone) MLRQ subunit	protein-coding
12329	chr3R	23787591	23787890	+	0	NA	intron (NM_001260338, intron 1 of 14)	intron (NM_001260338, intron 1 of 14)	5975	NM_001260338	42817	Dm.3480	NM_057796		mbc	CG10379|DOCK180|Dm MBC|Dmel\CG10379|Dock180|MBC|MBC/DOCK180|Mbc|Su(rac)1|dock180	myoblast city	protein-coding
359	chr2L	2817381	2817850	+	0	NA	exon (NM_001273039, exon 8 of 10)	exon (NM_001273039, exon 8 of 10)	-1855	NM_001103593	33476	Dm.25398	NM_001103593		G6P	CG15400|Dmel\CG15400|G6pase	Glucose-6-Phosphatase	protein-coding
15957	chrX	18262491	18263220	+	0	NA	Intergenic	Intergenic	-3338	NM_133050	32806		NM_133050		CG15059	Dmel\CG15059	uncharacterized protein	protein-coding
11064	chr3R	14338551	14338960	+	0	NA	intron (NM_001260174, intron 5 of 5)	intron (NM_001260174, intron 5 of 5)	10704	NM_057392	41746	Dm.4725	NM_057392		spn-B	CG3325|Dmel\CG3325|Rad51|Rad51-like|Spn-B|SpnB|XRCC3|rad51-like|spnB	spindle B	protein-coding
15592	chrX	15709641	15711380	+	0	NA	promoter-TSS (NM_132830)	promoter-TSS (NM_132830)	29	NM_132829	32508	Dm.2191	NM_132829		CG9281	BEST:LD38280|Dmel\CG9281	CG9281	protein-coding
6991	chr3L	7373131	7373510	+	0	NA	TTS (NM_139857)	TTS (NM_139857)	2520	NM_001274582	38821	Dm.11452	NM_139856		akirin	Akirin|CG8580|DmAkirin|Dmel\CG8580|EP(3)0906|anon-WO0118547.397|bhr	akirin	protein-coding
14292	chrX	5043061	5043330	+	0	NA	intron (NR_123794, intron 2 of 3)	(AATATA)n|Simple_repeat|Simple_repeat	-5078	NM_001169202	31429	Dm.1677	NM_080338		ovo	CG15467|CG6824|Dmel\CG6824|Fs(1)K1103|Fs(1)K1237|Fs(1)K155|OVO|Ovo|Ovo-D|Shv|Svb|Svb/Ovo|fs(1)K1237|fs(1)M1|fs(1)M38|ovo/shavenbaby|ovo/svb|ovoD|svb	ovo	protein-coding
2643	chr2L	20924761	20925090	+	0	NA	TTS (NM_001273723)	TTS (NM_001273723)	1222	NM_136233	35364	Dm.2209	NM_136233		RPA2	153194_at|CG9273|Dmel\CG9273|RpA2|dRPA2	Replication protein A2	protein-coding
11826	chr3R	20023311	20023650	+	0	NA	exon (NM_142601, exon 3 of 7)	exon (NM_142601, exon 3 of 7)	1776	NM_142601	42389		NM_142601		psidin	CG4845|Dmel\CG4845|ird16|psid	phagocyte signaling impaired	protein-coding
13702	chrX	718801	719540	+	0	NA	intron (NM_001297827, intron 2 of 15)	intron (NM_001297827, intron 2 of 15)	-31177	NM_001297830	31020	Dm.5418	NM_130500		CG5254	CT16777|Dmel\CG5254|EG:BACR19J1.2	CG5254	protein-coding
16393	chrX	21631321	21632180	+	0	NA	promoter-TSS (NR_133543)	promoter-TSS (NR_133543)	-141	NR_133540	26067356		NR_133534		flam	COM|COM/flam|CR46037|Dmel\CR46037|lincRNA.1041	flamenco	ncRNA
7947	chr3L	14783551	14784100	+	0	NA	intron (NM_140466, intron 1 of 7)	intron (NM_140466, intron 1 of 7)	2587	NM_140466	39611	Dm.4521	NM_140466		bmm	ATGL|Atgl|BMM|Bmm|CG5295|Dmel\CG5295	brummer	protein-coding
12978	chr3R	29536811	29537420	+	0	NA	Intergenic	CpG	2479	NR_048512	12798296		NR_048512		CR43613	Dmel\CR43613|lincRNA.892	ncRNA	ncRNA
8587	chr3L	19176521	19177130	+	0	NA	intron (NM_001275107, intron 4 of 5)	intron (NM_001275107, intron 4 of 5)	-6177	NM_001104173	40090	Dm.2524	NM_079431		fz2	CG9739|D-Fz2|D-fz2|DFZ2|DFz-2|DFz2|Dfrz2|Dfz2|Dfz[[2]]|Dm Fz2|Dmel\CG9739|FZ2|Fz2|dFz2|dfz(2)|dfz2|dfz2r|frz2|fz-2	frizzled 2	protein-coding
5569	chr2R	21571541	21571800	+	0	NA	promoter-TSS (NM_137744)	promoter-TSS (NM_137744)	-216	NM_137744	37456	Dm.13568	NM_137744		twz	CG10440|Dmel\CG10440|Twz	tiwaz	protein-coding
14082	chrX	3397631	3398310	+	0	NA	intron (NM_001297909, intron 2 of 3)	intron (NM_001297909, intron 2 of 3)	24811	NM_080323	31310	Dm.4239	NM_080323		Myc	CG10798|D-Myc|DM|DMYc|Dm|Dmel\CG10798|Dmyc|EG:BACN5I9.1|MYC|anon-WO03040301.171|bHLHe57|c-MYC|c-Myc|c-myc|d-myc|dMYC|dMyc|dMyc1|da|dm|dm/dMyc|dm/myc|dmyc|dmyc1|l(1)G0139|l(1)G0354|l(1)G0359|myc	Myc	protein-coding
3994	chr2R	10319761	10320370	+	0	NA	exon (NM_001103787, exon 2 of 2)	exon (NM_001103787, exon 2 of 2)	435	NM_001103787	5740154	Dm.22030	NM_001103787		CG34222	Dmel\CG34222|NEST:bs08e11|NEST:bs11e07|NEST:bs12c06	uncharacterized protein	protein-coding
9753	chr3R	4870501	4870830	+	0	NA	TTS (NM_079504)	TTS (NM_079504)	7868	NM_001300236	40606	Dm.5617	NM_141247		laf	C6|CG14660|Dmel\CG14660	labial associated factor	protein-coding
16075	chrX	19123101	19123750	+	0	NA	TTS (NM_133120)	TTS (NM_133120)	963	NM_133120	32895	Dm.27589	NM_133120		CG15882	Dmel\CG15882	uncharacterized protein	protein-coding
4298	chr2R	12207531	12207910	+	0	NA	TTS (NR_124521)	TTS (NR_124521)	1628	NR_124521	19835517		NR_124521		CR45276	Dmel\CR45276	ncRNA	ncRNA
3997	chr2R	10421021	10422410	+	0	NA	promoter-TSS (NM_206078)	promoter-TSS (NM_206078)	9	NM_206078	2768725	Dm.29123	NM_206078		CG33474	Dmel\CG33474	uncharacterized protein	protein-coding
2391	chr2L	18987071	18987970	+	0	NA	promoter-TSS (NM_136082)	promoter-TSS (NM_136082)	-187	NM_136082	35159	Dm.6168	NM_136082		CG15168	BcDNA:RE09053|Dmel\CG15168	uncharacterized protein	protein-coding
13412	chr4	385111	385720	+	0	NA	intron (NM_001258492, intron 3 of 9)	CpG	2907	NM_001258493	43789	Dm.1399	NM_166758		dati	CG10204|CG2052|DmLin29|Dmel\CG2052|Lin29	datilografo	protein-coding
12881	chr3R	28744871	28745510	+	0	NA	promoter-TSS (NM_079820)	promoter-TSS (NM_079820)	-408	NM_079820	43393	Dm.2335	NM_079820		AstA-R2	AR-2|ASTR|CG10001|D.AlstR2|DAR|DAR-2|DAR2|Dar-2|Dmel\CG10001|anon-WO0131005.7|anon-WO0170980.115|anon-WO0170980.116	Allatostatin A receptor 2	protein-coding
14615	chrX	7477271	7477890	+	0	NA	Intergenic	Intergenic	-9972	NR_123825	19834839		NR_123825		CR45534	Dmel\CR45534	ncRNA	ncRNA
14391	chrX	5965691	5966550	+	0	NA	promoter-TSS (NM_132057)	promoter-TSS (NM_132057)	-159	NM_001297991	50391	Dm.5496	NM_132057		Grip	CG14447|CG5980|DGrip|Dgrip|Dmel\CG14447|GRIP|dGRIP|dgrip|grip	Glutamate receptor binding protein	protein-coding
8643	chr3L	19634901	19637790	+	0	NA	promoter-TSS (NM_176363)	promoter-TSS (NM_176363)	-562	NM_176363	40143	Dm.12913	NM_140880		wnd	CG8789|DLK|DLK/ZPK|Dmel\CG8789|MAPKKK|Wnd|Wnd/DLK	wallenda	protein-coding
13185	chr3R	30857371	30857890	+	0	NA	Intergenic	Intergenic	5315	NM_079857	43656	Dm.1906	NM_079857		tll	CG1378|Dmel\CG1378|NR2E2|TLL|Tll|dm-tll	tailless	protein-coding
6048	chr2R	25125771	25126190	+	0	NA	intron (NM_001299947, intron 2 of 4)	intron (NM_001299947, intron 2 of 4)	-3452	NM_166706	246610	Dm.7435	NM_166706		CG30430	Dmel\CG30430|NEST:bs01g11|NEST:bs02g04|NEST:bs04a11|NEST:bs12g08|NEST:bs13e09|NEST:bs14e02|NEST:bs15a10|NEST:bs15d07|NEST:bs17g03|NEST:bs27g03|NEST:bs29b02	uncharacterized protein	protein-coding
1789	chr2L	13618881	13619180	+	0	NA	intron (NM_057839, intron 5 of 12)	intron (NM_057839, intron 5 of 12)	9056	NR_047948	12798194		NR_047948		mir-2489	CR42901|Dmel\CR42901|dme-mir-2489|miR-2489	mir-2489 stem loop	ncRNA
11949	chr3R	21129951	21130230	+	0	NA	promoter-TSS (NM_001104382)	promoter-TSS (NM_001104382)	-126	NM_142689	42507	Dm.2006	NM_142689		Ice2	CG10825|Dmel\CG10825	Interacts with the C terminus of ELL 2	protein-coding
4828	chr2R	15919591	15919960	+	0	NA	intron (NM_057381, intron 1 of 20)	intron (NM_057381, intron 1 of 20)	2343	NM_001103863	36746	Dm.4729	NM_057379		sli	CG33464|CG43758|CG8355|CT21700|CT37068|Dmel\CG43758|Dmel_CG33464|Dmel_CG8355|Sli|Slit|dSlit|fus3|l(2)05248|wdh	slit	protein-coding
1832	chr2L	13981091	13981580	+	0	NA	exon (NM_176033, exon 4 of 5)	exon (NM_176033, exon 4 of 5)	1209	NM_176033	34818		NM_135851		NimC2	BG:DS00180.14|CG18146|CG18146-PB|CT40902|DS00180.14|Dmel\CG18146|nimC2	Nimrod C2	protein-coding
1134	chr2L	8308021	8308500	+	0	NA	promoter-TSS (NM_135361)	promoter-TSS (NM_135361)	-68	NM_135360	34137	Dm.5523	NM_135360		Ostgamma	CG7830|Dmel\CG7830|MagT1|OST|dMagT1	Oligosaccharide transferase gamma subunit	protein-coding
12833	chr3R	28330711	28331480	+	0	NA	5' UTR (NM_001260417, exon 1 of 6)	5' UTR (NM_001260417, exon 1 of 6)	123	NM_001260417	53567	Dm.20475	NM_080259		larp	0031/08|0225/29|BcDNA:LD02611|CG14065|CG14066|CG42551|Dmel\CG42551|Dmel_CG14065|Dmel_CG14066|Larp|dlarp|l(3)S003108|l(3)S022529|larp1	La related protein	protein-coding
1205	chr2L	8805761	8806160	+	0	NA	Intergenic	Intergenic	-19685	NM_079996	44275	Dm.3272	NM_079996		SoxN	CG18024|DM64|Dmel\CG18024|SOX29F|SOXB1|Sox B1|Sry-rDM64|soxN	SoxNeuro	protein-coding
6573	chr3L	3545011	3545560	+	0	NA	promoter-TSS (NM_001043121)	promoter-TSS (NM_001043121)	-33	NM_001169869	38433	Dm.4814	NM_079180		Eip63E	CG10579|Dmel\CG10579|EIP63E|L63|PFTAIRE|Pftaire|cdc2-63E	Ecdysone-induced protein 63E	protein-coding
7221	chr3L	9390541	9390930	+	0	NA	exon (NM_140048, exon 2 of 6)	exon (NM_140048, exon 2 of 6)	6672	NM_079276	39078	Dm.2803	NM_079276		Hsp27	27|27K|28|CG4466|Dhsp27|DmHSP27|DmHsp27|Dmel23.6|Dmel\CG4466|HSP27|HSP28|Hsp 27|Hsp28|anon-WO0140519.69|hsp 27|hsp-27|hsp26|hsp27|hsp27/26|hsp28|small hsp locus 67B	Heat shock protein 27	protein-coding
12828	chr3R	28319901	28320190	+	0	NA	3' UTR (NM_001170286, exon 6 of 6)	3' UTR (NM_001170286, exon 6 of 6)	6196	NM_001170286	53567	Dm.20475	NM_080259		larp	0031/08|0225/29|BcDNA:LD02611|CG14065|CG14066|CG42551|Dmel\CG42551|Dmel_CG14065|Dmel_CG14066|Larp|dlarp|l(3)S003108|l(3)S022529|larp1	La related protein	protein-coding
13415	chr4	396781	397050	+	0	NA	TTS (NR_073616)	TTS (NR_073616)	-1310	NM_001258492	43789	Dm.1399	NM_166758		dati	CG10204|CG2052|DmLin29|Dmel\CG2052|Lin29	datilografo	protein-coding
6871	chr3L	6173481	6174300	+	0	NA	promoter-TSS (NM_139777)	promoter-TSS (NM_139777)	-10	NM_001274539	38714	Dm.862	NM_139776		CG10289	Dmel\CG10289|PpV[[R]]	uncharacterized protein	protein-coding
14310	chrX	5322471	5323120	+	0	NA	promoter-TSS (NM_001103414)	promoter-TSS (NM_001103414)	-99	NM_078492	31448	Dm.2995	NM_078492		Rnp4F	4F-rnp|4f-rnp|CG3312|Dmel\CG3312|RNP-4F|Rnp-4F|rnp-4f	RNA-binding protein 4F	protein-coding
10706	chr3R	11391731	11392470	+	0	NA	3' UTR (NM_176459, exon 5 of 5)	3' UTR (NM_176459, exon 5 of 5)	-15818	NM_079594	41364	Dm.2445	NM_079594		mRpL40	CG5242|Dmel\CG5242|MRPL22(24)|mRpL22-24	mitochondrial ribosomal protein L40	protein-coding
8090	chr3L	15610301	15610560	+	0	NA	promoter-TSS (NM_140529)	promoter-TSS (NM_140529)	-44	NM_140529	39694	Dm.29962	NM_140529		CG7650	BcDNA:AT27057|Dmel\CG7650	CG7650	protein-coding
5514	chr2R	21192271	21192520	+	0	NA	3' UTR (NM_057425, exon 9 of 9)	3' UTR (NM_057425, exon 9 of 9)	-1176	NM_137717	37418	Dm.4556	NM_137717		Lapsyn	CG15658|CT35842|Dmel\CG15658	Leucine-rich repeat activity-regulated protein at synapses	protein-coding
7151	chr3L	8829351	8829870	+	0	NA	intron (NM_001259756, intron 1 of 8)	intron (NM_001259756, intron 1 of 8)	2105	NM_079259	39013	Dm.2277	NM_079259		dally	CG4974|CT15952|Dally|Dmel\CG4974|anon-EST:Liang-1.63|clone 1.63|gem|l(3)06464|l(3)SG18	division abnormally delayed	protein-coding
4496	chr2R	13487861	13488400	+	0	NA	exon (NM_001274026, exon 4 of 5)	exon (NM_001274026, exon 4 of 5)	2513	NM_079006	36495	Dm.5691	NM_079006		cid	BcDNA:RE21270|CENH3|CENP-A|CENP-A/CID|CENP-A/Cid|CENPA|CG13329|CID|CID/CENP-A|CenH3|CenH3[CID]|CenH3[Cid]|Cenp-A|CenpA|CenpA/CID|Cid|Cid[Mel]|Dmel\CG13329|cenH3|cenpA	centromere identifier	protein-coding
4070	chr2R	10797611	10798170	+	0	NA	intron (NM_001201975, intron 1 of 8)	intron (NM_001201975, intron 1 of 8)	819	NM_001201975	36131	Dm.10908	NM_176144		CG33144	AAF58756.2|CG12339|CG7621|Dmel\CG33144|lincRNA.281	uncharacterized protein	protein-coding
5752	chr2R	23049541	23050400	+	0	NA	Intergenic	Intergenic	3648	NM_001038878	37655	Dm.5605	NM_079092		twi	CG2956|DTwist|Dmel\CG2956|EC9|TWI|Tw|Twi|Twist|bHLHb17|dip5	twist	protein-coding
2237	chr2L	17619881	17620530	+	0	NA	Intergenic	Intergenic	5485	NR_124341	19836020		NR_124341		CR44413	Dmel\CR44413	ncRNA	ncRNA
8017	chr3L	15187231	15187900	+	0	NA	Intergenic	Intergenic	-2875	NR_124945	19835732		NR_124945		CR44562	Dmel\CR44562	ncRNA	ncRNA
13856	chrX	1922701	1923620	+	0	NA	promoter-TSS (NM_206606)	promoter-TSS (NM_206606)	179	NM_130606	31157	Dm.3547	NM_130606		Ocrl	CG3573|Dmel\CG3573|EG:86E4.5|dOCRL|ocrl	Oculocerebrorenal syndrome of Lowe	protein-coding
1503	chr2L	11142521	11142930	+	0	NA	intron (NM_001298905, intron 7 of 21)	intron (NM_001298905, intron 7 of 21)	2692	NM_164958	261614	Dm.33484	NM_164958		CG31867	BcDNA:AT02643|CG6275|Dmel\CG31867	uncharacterized protein	protein-coding
4721	chr2R	15118951	15119380	+	0	NA	intron (NM_001259402, intron 1 of 6)	intron (NM_001259402, intron 1 of 6)	3704	NM_001043081	36678	Dm.11696	NM_137169		chn	CG11798|Chn|Dmel\CG11798|EPIL#6|EPIL6|anon-EST:Liang-1.13|clone 1.13|l(2)02064|l(2)k04218|taco	charlatan	protein-coding
10039	chr3R	6817811	6818340	+	0	NA	Intergenic	Intergenic	-1696	NR_073987	14462440		NR_073987		CR42651	CG42651|Dmel\CR42651|pri-mir-10	ncRNA	ncRNA
954	chr2L	7044111	7044390	+	0	NA	intron (NM_001259000, intron 1 of 4)	intron (NM_001259000, intron 1 of 4)	1891	NM_001259000	45683	Dm.7402	NM_080765		milt	CG13777|CG31630|CG43227|Dmel\CG43227|Dmel_CG13777|Dmel_CG31630|Milt|anon-WO0153538.19|l(2)k04704	milton	protein-coding
13509	chr4	818001	818260	+	0	NA	intron (NM_001014695, intron 3 of 4)	intron (NM_001014695, intron 3 of 4)	-10783	NM_166792	43844	Dm.18582	NM_166792		Sox102F	CG11153|Dmel\CG11153|SOX102D|SOXD|Sox D|Sox102D|SoxD	Sox102F	protein-coding
7781	chr3L	13663821	13664180	+	0	NA	intron (NM_001202161, intron 2 of 11)	intron (NM_001202161, intron 2 of 11)	2749	NM_079335	39527	Dm.13624	NM_079335		bru3	Bru-3|CG10046|CG12478|CG34243|CG43744|Dm Bru-3|Dmel\CG43744|Dmel_CG12478|Dmel_CG34243|bru-3|bruno-3|cg10046|cg12478|l(3)05871	bruno 3	protein-coding
15344	chrX	13277221	13278110	+	0	NA	intron (NM_001272581, intron 1 of 12)	intron (NM_001272581, intron 1 of 12)	-4921	NM_167356	32278	Dm.6484	NM_132640		HDAC4	CG1770|DHDAC4|Dmel\CG1770|GC1770|HDAC|HDAC4a|dHDAC4|dmHDA405|hdac4	Histone deacetylase 4	protein-coding
14682	chrX	7977121	7977590	+	0	NA	intron (NM_167142, intron 2 of 6)	intron (NM_167142, intron 2 of 6)	7652	NM_001169226	31717	Dm.7274	NM_078521		sn	CG15331|CG1536|CG32858|Dmel\CG32858|SN|Sn|fs(1)A1057|fs(1)K1421|fs(1)K418|fs(1)K473|fs(1)K743|fs(1)M45	singed	protein-coding
2718	chr2L	21416651	21417040	+	0	NA	promoter-TSS (NM_001032213)	promoter-TSS (NM_001032213)	-108	NM_001032178	3772004		NM_001032178		His1:CG33843	CG33843|Dmel\CG33843	histone H1	protein-coding
10515	chr3R	9926081	9926830	+	0	NA	intron (NM_001275514, intron 1 of 6)	(TACAGA)n|Simple_repeat|Simple_repeat	-2462	NM_001038952	41217	Dm.4030	NM_001038952		Glut4EF	BcDNA:GH25505|BcDNA:GM06804|BcDNA:RE66512|BcDNA:RH63124|CG11676|CG12802|CG12804|CG12805|CG32469|CG33975|CG34360|CG43757|D-Glut4EF|Dmel\CG34360|Dmel_CG12802|Dmel_CG33975|stretch	Glucose transporter 4 enhancer factor	protein-coding
1941	chr2L	14805751	14806060	+	0	NA	Intergenic	Copia_I-int|LTR|Copia	3571	NM_205994	2768925	Dm.13964	NM_205994		CG33308	BP1076|Dmel\CG33308|HDC02577|anon-SAGE:Wang-042	uncharacterized protein	protein-coding
6118	chr3L	228531	228920	+	0	NA	non-coding (NR_048207, exon 4 of 4)	non-coding (NR_048207, exon 4 of 4)	2879	NM_001202085	10178831	Dm.24674	NM_001202085		CG42846	Dmel\CG42846	uncharacterized protein	protein-coding
10947	chr3R	13471281	13471820	+	0	NA	Intergenic	Intergenic	5055	NR_133392	26067242		NR_133392		CR45914	Dmel\CR45914	ncRNA	ncRNA
10946	chr3R	13469131	13469920	+	0	NA	Intergenic	Intergenic	3030	NR_133392	26067242		NR_133392		CR45914	Dmel\CR45914	ncRNA	ncRNA
9822	chr3R	5223291	5223610	+	0	NA	promoter-TSS (NM_001259996)	promoter-TSS (NM_001259996)	-85	NM_169030	40623	Dm.5610	NM_141260		CG2604	CT40966|Dmel\CG2604	CG2604	protein-coding
8900	chr3L	21594181	21594470	+	0	NA	promoter-TSS (NR_073967)	promoter-TSS (NR_073967)	-272	NR_073967	14462905		NR_073967		CR43940	Dmel\CR43940	ncRNA	ncRNA
6646	chr3L	4092711	4093330	+	0	NA	promoter-TSS (NM_139599)	promoter-TSS (NM_139599)	-187	NM_139599	38486	Dm.4875	NM_139599		CG14990	Dmel\CG14990|SPH97	uncharacterized protein	protein-coding
1932	chr2L	14685471	14686290	+	0	NA	intron (NM_001144354, intron 1 of 10)	intron (NM_001144354, intron 1 of 10)	3460	NM_001169504	34850	Dm.2714	NM_078843		osp	BG:DS01486.5|BG:DS01486.7|BG:DS07721.2|CG3479|Dmel\CG3479|alw|anon-WO02059370.75|l(2)rJ571|v(2)rJ571	outspread	protein-coding
5277	chr2R	19447691	19447990	+	0	NA	exon (NM_166356, exon 2 of 2)	exon (NM_166356, exon 2 of 2)	-1554	NM_079070	37237	Dm.2829	NM_079070		EloC	BcDNA:RH71704|CG9291|Dmel\CG9291|Elongin-C|ElonginC|dElongin C|l(2)SH1299|l(2)SH1520|l(2)SH2 1520	Elongin C	protein-coding
10539	chr3R	10155561	10156050	+	0	NA	intron (NM_143815, intron 3 of 8)	intron (NM_143815, intron 3 of 8)	-4108	NM_001104267	5740723	Dm.36177	NM_001104267		CG34303	Dmel\CG34303	uncharacterized protein	protein-coding
5362	chr2R	20043521	20043800	+	0	NA	Intergenic	CpG	-14435	NR_124642	19835850		NR_124642		CR44631	Dmel\CR44631	ncRNA	ncRNA
11124	chr3R	14714071	14714860	+	0	NA	intron (NM_001300400, intron 1 of 8)	intron (NM_001300400, intron 1 of 8)	9796	NM_001038966	41783		NM_001038966		kibra	CG12600|CG33967|CG7552|DmKibra|Dmel\CG33967|Kib|Kibra|ORE-2|RE26350|kbr|kib|l(3)02404|l(3)j5C3|l(3)neo42	kibra	protein-coding
9713	chr3R	4658911	4660420	+	0	NA	promoter-TSS (NM_001144533)	promoter-TSS (NM_001144533)	86	NM_001259983	40583	Dm.7959	NM_141231		CG43427	CG1054|CG1055|CG14653|CG18253|CG31531|CG31534|Dmel\CG43427|Dmel_CG31531|Dmel_CG31534|anon-WO0140519.95	uncharacterized protein	protein-coding
5476	chr2R	20969941	20970880	+	0	NA	Intergenic	Intergenic	3607	NM_137683	37371	Dm.26986	NM_137683		CG15649	BcDNA:GH08880|Dmel\CG15649	uncharacterized protein	protein-coding
12894	chr3R	28860891	28862040	+	0	NA	intron (NM_001276118, intron 4 of 13)	(CT)n|Simple_repeat|Simple_repeat	-1968	NM_001300646	44266	Dm.7735	NM_079991		Inx3	CG1448|Dm-inx3|Dmel\CG1448|FBpp0084719|INX-3|Ix3|anon-EST:fe2B11|inx-3|inx3	Innexin 3	protein-coding
8834	chr3L	21135741	21136550	+	0	NA	promoter-TSS (NM_141027)	promoter-TSS (NM_141027)	-93	NM_141027	40332	Dm.2089	NM_141027		CG10565	Dmel\CG10565	uncharacterized protein	protein-coding
4357	chr2R	12586011	12586400	+	0	NA	intron (NM_165916, intron 1 of 11)	intron (NM_165916, intron 1 of 11)	2947	NM_001259353	36382	Dm.4374	NM_136955		Sin3A	159A11T|27/3|97/15|CG8815|Dmel\CG8815|ES2-3|ESTS:159A11T|EY2-9|SIN3|SIN3A|Sin 3A|Sin3|Sin3a|dSin3|dSin3A|l(2)08269|l(2)k02703|l(2)k05415|l(2)k09715|ld|sin3|sin3A|sin3a|sni3	Sin3A	protein-coding
11660	chr3R	18677381	18678100	+	0	NA	promoter-TSS (NM_169831)	promoter-TSS (NM_169831)	-78	NM_142485	42244		NM_142485		CG7706	Dmel\CG7706	CG7706	protein-coding
14734	chrX	8251311	8252090	+	0	NA	promoter-TSS (NM_167152)	promoter-TSS (NM_167152)	-13	NM_078528	31762	Dm.6840	NM_078528		ND-75	CG2286|Dmel\CG2286|ND75|NDUFS1|NUAM	NADH dehydrogenase (ubiquinone) 75 kDa subunit	protein-coding
6443	chr3L	2585951	2587700	+	0	NA	promoter-TSS (NM_206252)	promoter-TSS (NM_206252)	-285	NM_206252	44030	Dm.1870	NM_079940		msn	6286|CG16973|DMSN|Dmel\CG16973|HGK|JNKKKK|MESR5|MSN|Msn|NIK|Nik|l(3)03349|l(3)06946|l(3)6286|l(3)j1E2|msm	misshapen	protein-coding
10827	chr3R	12408051	12408830	+	0	NA	promoter-TSS (NM_206479)	promoter-TSS (NM_206479)	124	NM_141934	41522	Dm.7090	NM_141934		CG5196	Dmel\CG5196	CG5196	protein-coding
12128	chr3R	22145361	22145980	+	0	NA	intron (NM_001260304, intron 2 of 19)	intron (NM_001260304, intron 2 of 19)	11835	NM_001275898	42601	Dm.13728	NM_169997		SKIP	CG13863|CG13864|CG31163|CG5736|CG7086|CG7087|Dmel\CG31163	Shal K[+] channel interacting protein	protein-coding
10189	chr3R	7960441	7960810	+	0	NA	exon (NM_169203, exon 2 of 4)	exon (NM_169203, exon 2 of 4)	2161	NM_001275423	40940	Dm.3308	NM_079548		dsx	CG11094|DSX|Dmdsx|Dmel\CG11094|Dsx|Hr|dsxF|dsxM|ix-62c	doublesex	protein-coding
12906	chr3R	29027031	29027490	+	0	NA	promoter-TSS (NM_143398)	promoter-TSS (NM_143398)	24	NM_143398	43423	Dm.7736	NM_143398		CG1951	Dmel\CG1951	CG1951	protein-coding
7934	chr3L	14655421	14656490	+	0	NA	intron (NM_079347, intron 1 of 7)	intron (NM_079347, intron 1 of 7)	5991	NR_133240	26067216		NR_133240		CR45888	Dmel\CR45888	ncRNA	ncRNA
13482	chr4	688341	688660	+	0	NA	TTS (NM_001272141)	TTS (NM_001272141)	7555	NM_166786	43811	Dm.6533	NM_166786		myo	BcDNA:LD02307|CG1838|Dmel\CG1838|MYO|Myo|Myoglianin|myg	myoglianin	protein-coding
2805	chr2L	21658431	21659170	+	0	NA	promoter-TSS (NM_165390)	promoter-TSS (NM_165390)	65	NM_165390	35420	Dm.6467	NM_136273		Cul2	CG1512|CUL2|Cul-2|Cullin2|DMcul-2|Dmel\CG1512|cul-2|cul2|dCul2|l(2)02074	Cullin 2	protein-coding
2428	chr2L	19164381	19166690	+	0	NA	promoter-TSS (NM_001299154)	promoter-TSS (NM_001299154)	-332	NM_001299154	35197	Dm.6426	NM_057597		brat	BRAT|Brat|CG10719|Cf|Dmel\CG10719|E60|anon-37CDa|fs(2)ltoPM43|l(2)37Cf|l(2)E60|l(2)brat|lincRNA.S1565	brain tumor	protein-coding
6919	chr3L	6764191	6765180	+	0	NA	Intergenic	Intergenic	-1439	NM_168180	38751	Dm.4601	NM_139802		CG32392	CG10099|CG14912|Dmel\CG32392	uncharacterized protein	protein-coding
301	chr2L	2178031	2178900	+	0	NA	5' UTR (NM_001272981, exon 1 of 4)	5' UTR (NM_001272981, exon 1 of 4)	289	NM_001272981	33392	Dm.267	NM_078731		aop	AOP|Aop|Aop/Yan|CG3166|DROYANET|DROYANETSB|Dmel\CG3166|SK2-1|YAN|Yan|aop/yan|fus6|pok|yan|yan/pok	anterior open	protein-coding
15217	chrX	12271541	12272320	+	0	NA	intron (NM_001169258, intron 1 of 13)	intron (NM_001169258, intron 1 of 13)	-2705	NM_001298222	19835642		NM_001298222		CG45603	Dmel\CG45603	uncharacterized protein	protein-coding
7484	chr3L	11491571	11492320	+	0	NA	intron (NM_140213, intron 1 of 3)	intron (NM_140213, intron 1 of 3)	-1926	NM_001300105	39284	Dm.20385	NM_140213		chrb	BcDNA:GH09771|CG7533|Charybde|Dmel\CG7533|EP(3)1035|anon-EST:Liang-2.51|char|clone 2.51	charybde	protein-coding
11208	chr3R	15474591	15475140	+	0	NA	intron (NM_206496, intron 1 of 16)	intron (NM_206496, intron 1 of 16)	1328	NM_206496	41887	Dm.11730	NM_169659		AdamTS-A	CG14869|CG6107|CT19033|Dmel\CG14869	ADAM metallopeptidase with thrombospondin type 1 motif A	protein-coding
7024	chr3L	7854651	7854970	+	0	NA	5' UTR (NM_168236, exon 1 of 6)	5' UTR (NM_168236, exon 1 of 6)	738	NM_168235	45588	Dm.1594	NM_080093		Pdp1	CG17888|DM1|DM32|Dmel\CG17888|PDP|PDP1|PDP1epsilon|Pdp-1|Pdp1 epsilon|Pdp1&e;gr|Pdp1e|Pdp1epsilon|anon-WO0140519.206|mel_pdp1|pdp|pdp1|pdp1epsilon	PAR-domain protein 1	protein-coding
9134	chr3L	23303771	23304110	+	0	NA	Intergenic	DMRT1B|LINE|R1	34160	NM_001300225	40517	Dm.7158	NM_079495		alpha-Cat	CG17947|CT39986|Dalpha-Cat|Dalpha-cat|DalphaC|Dalphacat|Dmcatp|Dmel\CG17947|LD30423p|a-Cat|a-cat|alpha-CAT|alpha-cat|alpha-catenin|alpha-ctn|alphaCAT|alphaCat|alphacat	alpha Catenin	protein-coding
13589	chr4	1196781	1197450	+	0	NA	promoter-TSS (NM_001038717)	promoter-TSS (NM_001038717)	-267	NM_001038717	3885565	Dm.30429	NM_001038716		PIP4K	CG17471|Dmel\CG17471|PIP5K 102E|dPIP4K	Phosphatidylinositol 5-phosphate 4-kinase	protein-coding
5947	chr2R	24493701	24494180	+	0	NA	promoter-TSS (NM_138075)	promoter-TSS (NM_138075)	8	NM_138075	37907	Dm.27793	NM_138075		CG13590	Dmel\CG13590	uncharacterized protein	protein-coding
3225	chr2R	4704931	4705460	+	0	NA	intron (NM_001273774, intron 10 of 21)	intron (NM_001273774, intron 10 of 21)	23822	NM_001169581	3355136	Dm.1465	NM_001042986		Nipped-B	CG17704|CG40281|Dmel\CG17704|NIPPED-B|NipB|l(2)02047|nipped-B	Nipped-B	protein-coding
10084	chr3R	6966161	6967070	+	0	NA	intron (NM_206446, intron 2 of 6)	intron (NM_206446, intron 2 of 6)	32613	NM_206453	40835	Dm.3803	NM_206444		Antp	3.4|ANT-C|ANT-P|ANTC|ANTP|Ant|AntP|AntP1|Antp P1|Antp P2|Antp1|Aus|BG:DS07700.1|CG1028|DMANTPE1|DRO15DC96Z|DmAntp|Dmel\CG1028|Hu|Ns|Scx|antp|l(3)84Ba	Antennapedia	protein-coding
7498	chr3L	11562411	11562950	+	0	NA	promoter-TSS (NM_001144461)	promoter-TSS (NM_001144461)	7	NM_001259788	39294	Dm.929	NM_140218		CG7394	BcDNA:RE52392|D.M.UKP|Dmel\CG7394|TIM14	CG7394	protein-coding
8346	chr3L	17396331	17397020	+	0	NA	exon (NM_170638, exon 5 of 5)	exon (NM_170638, exon 5 of 5)	4673	NR_144649	43918		NR_144649		noe	CG32172|CR32172|Dmel\CR32172|Noe|anon-EST:Posey101|anon-EST:Posey151|anon-EST:Posey243|anon-EST:Posey292|anon-EST:Posey35|anon-WO02059370.51	ncRNA	ncRNA
14849	chrX	9129201	9129820	+	0	NA	intron (NM_132300, intron 1 of 3)	intron (NM_132300, intron 1 of 3)	5530	NM_132300	31843	Dm.5643	NM_132300		fend	BcDNA:RH56795|CG12664|Dmel\CG12664|Dromel_CG12664_FBtr0071349_ld14_mORF|LD14|ld14	forked end	protein-coding
5948	chr2R	24513601	24514270	+	0	NA	intron (NM_138078, intron 2 of 4)	intron (NM_138078, intron 2 of 4)	1062	NM_166675	37912	Dm.7406	NM_138078		Letm1	B4D|CG4589|DmLETM1|Dmel\CG4589|anon-60Da|anon60Da|dLetm1|l(2)k10502|letm1	LETM1 ortholog	protein-coding
6876	chr3L	6192871	6194080	+	0	NA	promoter-TSS (NM_168161)	promoter-TSS (NM_168161)	-5	NM_001274543	38721	Dm.2969	NM_058020		Trn	CG7398|Dmel\CG7398|IMPbeta2|TRN|Tm|Trn1|dTRN|dTrn	Transportin	protein-coding
271	chr2L	1967201	1967740	+	0	NA	intron (NM_001272960, intron 1 of 1)	CpG	2892	NM_001272960	326152	Dm.8473	NM_134787		erm	CG31670|CG7312|Dmel\CG31670|dFezf|dfezl	earmuff	protein-coding
12831	chr3R	28324661	28327640	+	0	NA	promoter-TSS (NM_001170286)	promoter-TSS (NM_001170286)	91	NM_001170286	53567	Dm.20475	NM_080259		larp	0031/08|0225/29|BcDNA:LD02611|CG14065|CG14066|CG42551|Dmel\CG42551|Dmel_CG14065|Dmel_CG14066|Larp|dlarp|l(3)S003108|l(3)S022529|larp1	La related protein	protein-coding
3533	chr2R	7159481	7160030	+	0	NA	intron (NM_165508, intron 1 of 5)	intron (NM_165508, intron 1 of 5)	-1514	NM_080112	45908	Dm.1783	NM_080112		nec	CG1857|Dmel\CG1857|NEC|Nec|SER3|Ser3|Spn43Ac|anon-WO0118057.3	necrotic	protein-coding
2511	chr2L	19690811	19691060	+	0	NA	intron (NM_001259165, intron 4 of 16)	intron (NM_001259165, intron 4 of 16)	10033	NM_001299159	46000	Dm.14123	NM_080124		scw	BcDNA:LD30945|CG31695|Dmel\CG31695|SCW|Scw|l(2)37Ff|l(2)IG76|mor2	screw	protein-coding
3186	chr2R	4187801	4188560	+	0	NA	promoter-TSS (NM_001042968)	promoter-TSS (NM_001042968)	-53	NM_001042968	3355016	Dm.6549	NM_001042968		RNASEK	BcDNA:GM16138|CG40127|Dmel\CG40127|GM16138|NC110|anon-EST:Posey156|dRNASEK|l(2)NC110	Ribonuclease kappa	protein-coding
1598	chr2L	11977531	11978050	+	0	NA	Intergenic	Intergenic	-3801	NM_135684	34607	Dm.26798	NM_135684		CG16965	Dmel\CG16965	uncharacterized protein	protein-coding
4793	chr2R	15749571	15750100	+	0	NA	intron (NM_001299537, intron 1 of 3)	(AC)n|Simple_repeat|Simple_repeat	14339	NM_001299537	36736		NM_137212		CG30089	CG12305|CG12966|CG12967|Dmel\CG30089	uncharacterized protein	protein-coding
13553	chr4	1026451	1028620	+	0	NA	promoter-TSS (NM_166805)	promoter-TSS (NM_166805)	-328	NR_073624	14462361		NR_073624		CR44031	Dmel\CR44031	ncRNA	ncRNA
8903	chr3L	21604221	21604750	+	0	NA	intron (NM_001275249, intron 1 of 7)	intron (NM_001275249, intron 1 of 7)	-3638	NM_168927	40398	Dm.3243	NM_141079		TfAP-2	AP-2|AP-2alpha|CG7807|DAP-2|Dmel\CG7807|dAP-2|dAP-2alpha|dTfap2|l(3)1215	Transcription factor AP-2	protein-coding
14130	chrX	3845181	3846780	+	0	NA	promoter-TSS (NM_001103407)	promoter-TSS (NM_001103407)	82	NM_001103407	31339	Dm.17730	NM_130722		ec	CG2904|Dmel\CG2904|EG:EG0002.3|Ec|Q1W9Q0	echinus	protein-coding
9436	chr3R	432021	432380	+	0	NA	Intergenic	STALKER4_I-int|LTR|Gypsy	-134876	NM_001316563	26067052		NM_001316563		Myo81F	CG15831|CG40155|CG40204|CG41281|CG41518|CG41527|CG42621|CG42622|CG42623|CG42624|CG45784|Dmel\CG45784|Dmel_CG15831|Dmel_CG40155|Dmel_CG40204|Dmel_CG41281|Dmel_CG41518|Dmel_CG41527|Dmel_CG42621|Dmel_CG42622|Dmel_CG42623|Dmel_CG42624	Myosin 81F	protein-coding
12308	chr3R	23677261	23678250	+	0	NA	intron (NM_142908, intron 1 of 2)	intron (NM_142908, intron 1 of 2)	397	NM_142908	42787	Dm.6151	NM_142908		GILT3	CG13822|Dmel\CG13822|GILT	Gamma-interferon-inducible lysosomal thiol reductase 3	protein-coding
13543	chr4	974291	975370	+	0	NA	promoter-TSS (NR_003115)	promoter-TSS (NR_003115)	-338	NR_003114	4379815		NR_003113		sphinx	CR34154|Dmel\CR34154|Sphinx|spx	ncRNA	ncRNA
8668	chr3L	19861181	19861700	+	0	NA	promoter-TSS (NR_125009)	promoter-TSS (NR_125009)	-18	NR_125009	19835067		NR_125009		CR45433	Dmel\CR45433	ncRNA	ncRNA
1234	chr2L	9066351	9066830	+	0	NA	5' UTR (NM_164846, exon 2 of 10)	5' UTR (NM_164846, exon 2 of 10)	-4442	NR_124154	19835410		NR_124154		CR44483	Dmel\CR44483	ncRNA	ncRNA
8001	chr3L	15116361	15116630	+	0	NA	promoter-TSS (NM_140492)	promoter-TSS (NM_140492)	-242	NM_001202179	39647	Dm.964	NM_140492		Cep135	Bld-10|Bld10|Bld10p|CEP135|CG17081|DCep135|DCep135/Bld10|DmBLD10|Dmel\CG17081|bld10|dbld10	Centrosomal protein 135kDa	protein-coding
10308	chr3R	8680301	8680920	+	0	NA	promoter-TSS (NM_206460)	promoter-TSS (NM_206460)	-576	NM_206460	2768664	Dm.23731	NM_206460		CG33325	Dmel\CG33325	uncharacterized protein	protein-coding
3455	chr2R	6635241	6636870	+	0	NA	promoter-TSS (NM_001273797)	promoter-TSS (NM_001273797)	32	NM_001273797	35559	Dm.3339	NM_058091		Trap1	AAN71071|CG3152|Dmel\CG3152|TRAP1|TRAP1dr|dtrap-1|trap1	Trap1	protein-coding
14824	chrX	8900011	8900560	+	0	NA	promoter-TSS (NM_001272433)	promoter-TSS (NM_001272433)	-21	NM_001272433	31817	Dm.110	NM_132279		CG1885	Dmel\CG1885	CG1885	protein-coding
13526	chr4	905941	906330	+	0	NA	5' UTR (NM_001297788, exon 5 of 28)	5' UTR (NM_001297788, exon 5 of 28)	-1314	NM_143692	43841	Dm.3358	NM_143692		unc-13	CG2999|DUNC-13|Dmel\CG2999|Dunc-13|Dunc13|Munc-13|Munc-13/UNC-13|UNC-13|UNC-13-B|Unc-13|dUNC-13|dUnc-13|drunc13|dunc-13|l(4)ry16|unc	unc-13	protein-coding
13437	chr4	467241	467650	+	0	NA	promoter-TSS (NM_143666)	promoter-TSS (NM_143666)	-52	NM_001347760	3772538	Dm.13908	NM_001347760		CG33941	BcDNA:GM01028|CG13303|CR33941|CT32596|Dmel\CG33941|MRE3|pncr013:4	uncharacterized protein	protein-coding
12916	chr3R	29087371	29088790	+	0	NA	promoter-TSS (NM_001276123)	promoter-TSS (NM_001276123)	-233	NM_001276123	43435	Dm.21690	NM_143409		CG11873	Dmel\CG11873|anon-WO0140519.162	uncharacterized protein	protein-coding
15113	chrX	11533971	11534370	+	0	NA	intron (NM_206688, intron 1 of 4)	intron (NM_206688, intron 1 of 4)	-13252	NR_047793	12797961		NR_047793		mir-2492	CR43042|Dmel\CR43042|dme-mir-2492|miR-2492	mir-2492 stem loop	ncRNA
888	chr2L	6649041	6649610	+	0	NA	promoter-TSS (NM_001273211)	promoter-TSS (NM_001273211)	-63	NM_164697	33930	Dm.330	NM_135214		Tango1	CG11098|Dmel\CG11098|TANGO1|tango1	Transport and Golgi organization 1	protein-coding
14418	chrX	6119451	6119730	+	0	NA	intron (NM_001258616, intron 16 of 25)	intron (NM_001258616, intron 16 of 25)	25004	NM_001297996	31547	Dm.2948	NM_078501		Nep1	CG5894|CG5905|CG5914|DmeNEP1|Dmel\CG5905|NEP|NEP1|dNEP1|nep1	Neprilysin 1	protein-coding
3845	chr2R	9398441	9399340	+	0	NA	promoter-TSS (NM_176116)	promoter-TSS (NM_176116)	-156	NM_001299318	35963	Dm.6389	NM_136640		Non1	BcDNA:LD23830|CG30341|CG8801|Dmel\CG8801|LD23830	Novel nucleolar protein 1	protein-coding
1042	chr2L	7639651	7641860	+	0	NA	Intergenic	Intergenic	3804	NR_124135	19835768		NR_124135		CR44800	Dmel\CR44800|lincRNA.71	ncRNA	ncRNA
276	chr2L	1973821	1974740	+	0	NA	exon (NM_001272963, exon 1 of 4)	exon (NM_001272963, exon 1 of 4)	168	NM_134788	33369	Dm.2301	NM_134788		Der-1	CG10908|Dmel\CG10908|l(2)SH1964|l(2)SH2 1964	Derlin-1	protein-coding
13939	chrX	2384911	2385520	+	0	NA	exon (NM_001169176, exon 2 of 7)	exon (NM_001169176, exon 2 of 7)	2449	NM_001272258	31224	Dm.12239	NM_130645		PsGEF	CG14045|CG14047|CG43947|DmPsGEF|Dmel\CG43947|Dmel_CG14045|Dmel_CG14047|EG:BACH48C10.4|EG:BACH7M4.1|EG:BACH7M4.2|FBgn0264598|PsGef|null	Protostome-specific GEF	protein-coding
3291	chr2R	5354291	5354780	+	0	NA	exon (NM_001273779, exon 2 of 2)	exon (NM_001273779, exon 2 of 2)	541	NM_001273779	35491	Dm.14583	NM_136324		COX4L	BcDNA:AT07685|CG10396|COX IV|COXIV|CX41|CX42|Dmel\CG10396|IV|cox4	Cytochrome c oxidase subunit 4-like	protein-coding
1950	chr2L	14910181	14910850	+	0	NA	intron (NM_001299017, intron 19 of 19)	CpG	-14075	NM_135887	34870		NM_135887		CG3491	BG:DS03323.1|Dmel\CG3491	CG3491	protein-coding
1314	chr2L	9893111	9893840	+	0	NA	promoter-TSS (NM_135474)	promoter-TSS (NM_135474)	-29	NM_135474	34307		NM_135474		mtDNA-helicase	CG5924|Dmel\CG5924|mtDNA helicase	mitochondrial DNA helicase	protein-coding
5440	chr2R	20821451	20821800	+	0	NA	3' UTR (NM_057676, exon 4 of 4)	3' UTR (NM_057676, exon 4 of 4)	10793	NM_001299717	37356	Dm.33417	NM_057858		sktl	25/17|CG9985|Dmel\CG9985|PIP5-kinase|PIP5K|PIP5K 57B6|Sktl|fam|l(2)05475|l(2)k12405|ski	skittles	protein-coding
6414	chr3L	2371861	2372330	+	0	NA	promoter-TSS (NM_001169857)	promoter-TSS (NM_001169857)	-104	NM_139459	38301	Dm.5943	NM_139459		CG8993	8993|Dmel\CG8993	CG8993	protein-coding
11854	chr3R	20355851	20356100	+	0	NA	Intergenic	Intergenic	-2864	NR_125213	19834805		NR_125213		CR45023	Dmel\CR45023	ncRNA	ncRNA
12385	chr3R	24076951	24078400	+	0	NA	intron (NM_001202345, intron 2 of 2)	HOBO|DNA|hAT-hobo	19388	NM_142954	42853	Dm.3313	NM_142954		SMC1	AAF56231|CG6057|DmSMC1|Dmel\CG6057|Smc1|dSMC1|smc1	Structural maintenance of chromosomes 1	protein-coding
5723	chr2R	22813631	22814150	+	0	NA	exon (NM_001103953, exon 7 of 10)	exon (NM_001103953, exon 7 of 10)	-2584	NM_001202057	246518	Dm.21187	NM_166560		CG30271	BcDNA:AT17081|CG13528|Dmel\CG30271	uncharacterized protein	protein-coding
12187	chr3R	22652531	22652800	+	0	NA	intron (NM_001300540, intron 2 of 12)	CpG-16651	12857	NM_001300541	42676	Dm.3687	NM_142819		wake	CG17622|CG17623|CG42686|CG45058|CG6954|Dmel\CG45058|Dmel_CG17622|Dmel_CG17623|Dmel_CG42686|Dmel_CG6954|ban	wide awake	protein-coding
14081	chrX	3396621	3397120	+	0	NA	intron (NM_001297909, intron 2 of 3)	intron (NM_001297909, intron 2 of 3)	23711	NM_080323	31310	Dm.4239	NM_080323		Myc	CG10798|D-Myc|DM|DMYc|Dm|Dmel\CG10798|Dmyc|EG:BACN5I9.1|MYC|anon-WO03040301.171|bHLHe57|c-MYC|c-Myc|c-myc|d-myc|dMYC|dMyc|dMyc1|da|dm|dm/dMyc|dm/myc|dmyc|dmyc1|l(1)G0139|l(1)G0354|l(1)G0359|myc	Myc	protein-coding
6962	chr3L	7078311	7078770	+	0	NA	Intergenic	Intergenic	-1078	NM_001274565	38771	Dm.15533	NM_139816		CG8641	Dmel\CG8641|Q9VS10	CG8641	protein-coding
16080	chrX	19153301	19154360	+	0	NA	promoter-TSS (NM_001144748)	promoter-TSS (NM_001144748)	-372	NM_001144748	32898	Dm.3638	NM_133123		RhoGAP18B	5-131|CG17015|CG42274|CG7481|CG7502|CG7531|Dmel\CG42274|Dmel_CG7481|Dmel_CG7502|whir	Rho GTPase activating protein at 18B	protein-coding
8491	chr3L	18360951	18362330	+	0	NA	Intergenic	Intergenic	36795	NM_079414	40015	Dm.2529	NM_079414		rpr	CG4319|Dmel\CG4319|RPR|Reaper|Rpr|anon-WO0162936.19|rp	reaper	protein-coding
9719	chr3R	4705151	4705470	+	0	NA	promoter-TSS (NM_176400)	promoter-TSS (NM_176400)	-836	NM_141231	40583	Dm.7959	NM_141231		CG43427	CG1054|CG1055|CG14653|CG18253|CG31531|CG31534|Dmel\CG43427|Dmel_CG31531|Dmel_CG31534|anon-WO0140519.95	uncharacterized protein	protein-coding
8261	chr3L	16683551	16683870	+	0	NA	intron (NM_001259870, intron 2 of 5)	ROO_I-int|LTR|Pao	-5558	NR_124962	19835056		NR_124961		CR45179	Dmel\CR45179	ncRNA	ncRNA
8881	chr3L	21500011	21500420	+	0	NA	intron (NM_001275234, intron 5 of 5)	PROTOP_A|DNA|P	-1206	NM_141064	40381	Dm.1039	NM_141064		Est-Q	CG7529|Dmel\CG7529	Esterase Q	protein-coding
8949	chr3L	21824771	21825330	+	0	NA	promoter-TSS (NM_001144524)	promoter-TSS (NM_001144524)	85	NM_001202227	40431	Dm.6872	NM_141108		CG7414	Dmel\CG7414|anon-WO0118547.243	CG7414	protein-coding
7953	chr3L	14801341	14801660	+	0	NA	TTS (NM_206362)	TTS (NM_206362)	668	NM_001274920	44005	Dm.7234	NM_143708		NHP2	CG5258|Dmel\CG5258|FBgn0029148	NHP2	protein-coding
1088	chr2L	8030371	8031880	+	0	NA	TTS (NM_001273291)	TTS (NM_001273291)	115	NM_164780	34096	Dm.5272	NM_135333		Cka	5836|CG7392|CKA|Dcka|Dmel\CG7392|anon-WO0172774.174|anon-WO0172774.175|anon-WO0172774.177|anon-WO0172774.179|cka|l(2)05836|l(2)s1883	Connector of kinase to AP-1	protein-coding
13742	chrX	1034291	1034960	+	0	NA	intron (NM_206600, intron 1 of 6)	DM412|LTR|Gypsy	1309	NM_001258528	31054		NM_057408		su(w[a])	CG3019|DmSWAP|Dmel\CG3019|EG:BACR7A4.10|SWAP|su(w)|su(w[a])-1|su(w[a])-2|su(wa)|su-w|su[wa]	suppressor of white-apricot	protein-coding
16033	chrX	18789821	18790450	+	0	NA	promoter-TSS (NM_001258813)	promoter-TSS (NM_001258813)	-27	NM_001258813	45970	Dm.211	NM_080122		S6KL	3-10|BIN4|BcdK|Bin4|CG7001|Dmel\CG7001|PK17E|Pk17E|Pk?4|bin4|pk17e	S6 Kinase Like	protein-coding
15497	chrX	15029341	15029610	+	0	NA	intron (NM_001258745, intron 1 of 5)	intron (NM_001258745, intron 1 of 5)	5039	NM_132762	32430	Dm.7134	NM_132762		be	BEST:LD10566|CG15026|CG32594|CG5530|Dmel\CG32594|E|anon-EST:CL1a5	ben	protein-coding
4522	chr2R	13663701	13664420	+	0	NA	promoter-TSS (NM_137050)	promoter-TSS (NM_137050)	-462	NM_137050	36517	Dm.30973	NM_137050		CG6209	Dmel\CG6209|mst101(2)	CG6209	protein-coding
4831	chr2R	15927851	15928100	+	0	NA	5' UTR (NM_166121, exon 1 of 7)	5' UTR (NM_166121, exon 1 of 7)	355	NM_166121	36747	Dm.10846	NM_137220		bdg	CG8291|Dmel\CG8291	bedraggled	protein-coding
7162	chr3L	8954431	8955000	+	0	NA	promoter-TSS (NM_168301)	promoter-TSS (NM_168301)	-252	NM_001274679	39018	Dm.4024	NM_140009		orb2	CG43113|CG43782|CG5735|Dmel\CG43782|Dmel_CG43113|Dmel_CG5735|Dmel_CG5741|Orb2|anon-WO0140519.222|cg5735	orb2	protein-coding
12983	chr3R	29547411	29548780	+	0	NA	Intergenic	Intergenic	-8291	NM_057976	45285	Dm.1455	NM_057976		Dr	153515_at|99B|CG1897|Dmel\CG1897|Dr/msh|Msh|Msx|l(3)FA30|ltt|msh|msh-1|msh1	Drop	protein-coding
14294	chrX	5046441	5048630	+	0	NA	promoter-TSS (NM_001169202)	promoter-TSS (NM_001169202)	-738	NM_001169202	31429	Dm.1677	NM_080338		ovo	CG15467|CG6824|Dmel\CG6824|Fs(1)K1103|Fs(1)K1237|Fs(1)K155|OVO|Ovo|Ovo-D|Shv|Svb|Svb/Ovo|fs(1)K1237|fs(1)M1|fs(1)M38|ovo/shavenbaby|ovo/svb|ovoD|svb	ovo	protein-coding
11101	chr3R	14624261	14624550	+	0	NA	intron (NM_001275645, intron 1 of 5)	intron (NM_001275645, intron 1 of 5)	1298	NM_169591	41772	Dm.2889	NM_169591		put	Act-r|Atr|Atr-II|Atr88CD|AtrII|CG7904|Dmel\CG7904|PUNT|Punt|Put|STK-C|TGF-B|TGF-beta|Tgf-r|atrII|dlhC|l(3)10460|l(3)j5A5|pun	punt	protein-coding
6707	chr3L	4568751	4569020	+	0	NA	exon (NM_144080, exon 4 of 12)	exon (NM_144080, exon 4 of 12)	-6079	NM_001259698	38562	Dm.2237	NM_139660		CG42540	CG13718|CG13719|CG32245|CG7468|Dmel\CG42540|Dmel_CG13719|Dmel_CG32245	uncharacterized protein	protein-coding
15368	chrX	13563361	13564400	+	0	NA	promoter-TSS (NM_001103503)	promoter-TSS (NM_001103503)	57	NM_001272592	32312	Dm.17452	NM_167374		Tango13	CG1573|CG15758|CG15759|CG32629|CG32629/CG32632|CG32632|Dmel\CG32632|Dmel_CG15758|Dmel_CG32629|TANGO13	Transport and Golgi organization 13	protein-coding
9804	chr3R	5109361	5110430	+	0	NA	promoter-TSS (NM_001259995)	promoter-TSS (NM_001259995)	-717	NM_001259995	12798230	Dm.38892	NM_001259995		CG43131	Dmel\CG43131	uncharacterized protein	protein-coding
14268	chrX	4761881	4762140	+	0	NA	Intergenic	Intergenic	8127	NM_131956	31409		NM_131956		CG15472	Dmel\CG15472	uncharacterized protein	protein-coding
1974	chr2L	15111511	15111940	+	0	NA	intron (NM_135895, intron 1 of 1)	intron (NM_135895, intron 1 of 1)	-1755	NM_057250	34888	Dm.7818	NM_057250		stc	151662_s_at|BG:DS04929.4|BcDNA.LD22726|BcDNA:LD22726|CG3647|Cf4|Dmel\CG3647|LD22726|br33|l(2)35Cb|l(2)SH1565|l(2)SH2 1565|l(2)br33|l35Cb	shuttle craft	protein-coding
10956	chr3R	13638061	13638380	+	0	NA	3' UTR (NM_169529, exon 5 of 5)	3' UTR (NM_169529, exon 5 of 5)	6278	NM_142042	41665	Dm.4307	NM_142042		CG10841	Dmel\CG10841|anon-WO0140519.42	uncharacterized protein	protein-coding
11969	chr3R	21273601	21274080	+	0	NA	promoter-TSS (NM_142706)	promoter-TSS (NM_142706)	-23	NM_142706	42527	Dm.4069	NM_142706		CG3308	Dmel\CG3308	CG3308	protein-coding
355	chr2L	2809541	2809850	+	0	NA	exon (NM_001273038, exon 2 of 5)	exon (NM_001273038, exon 2 of 5)	1373	NM_078737	33474	Dm.6843	NM_078737		daw	ALP23B|Alp|Alp23B|Alp23b|CG16987|DAW|Daw|Dmel\CG16987|cg16987	dawdle	protein-coding
4760	chr2R	15528391	15528810	+	0	NA	intron (NM_001274070, intron 1 of 16)	(TATA)n|Simple_repeat|Simple_repeat	3659	NM_135357	36718		NM_135357		Khc-73	CG8183|DmKIN73|DmKin73|DmKlp73|Dmel\CG8183|KHC-73|KIF 13A|KIF13A/B|KLP73|Khc73|Kin73|Kinesin-73|anon-EST:fe3C9|khc-73	Kinesin heavy chain 73	protein-coding
14865	chrX	9206221	9206830	+	0	NA	exon (NM_132311, exon 2 of 2)	exon (NM_132311, exon 2 of 2)	4022	NM_132311	31859		NM_132311		SmydA-9	CG12119|Dmel\CG12119|lincRNA.971	SET and MYND domain containing, arthropod-specific, member 9	protein-coding
6418	chr3L	2385261	2386180	+	0	NA	intron (NM_001202097, intron 1 of 1)	intron (NM_001202097, intron 1 of 1)	-2272	NM_139462	38306	Dm.6482	NM_139462		CG45186	CG1141|CG12790|CG13797|CG13798|CG13799|CG13800|CG16763|CG16764|CG32306|CG33231|CG33232|CG42669|Dmel\CG45186|Dmel_CG13800|Dmel_CG32306|Dmel_CG33231|Dmel_CG33232|Dmel_CG42669|c62E-11	uncharacterized protein	protein-coding
13521	chr4	866511	867910	+	0	NA	promoter-TSS (NM_001169357)	promoter-TSS (NM_001169357)	-185	NM_001169356	43842	Dm.1409	NM_143693		Gyf	CG11148|Dmel\CG11148|Q7KQM6	Gigyf	protein-coding
9306	chr3L	26219831	26220150	+	0	NA	5' UTR (NM_001170384, exon 2 of 3)	5' UTR (NM_001170384, exon 2 of 3)	-1955	NM_001015214	3354965	Dm.3701	NM_001015212		CG40160	BcDNA:LD13269|Dmel\CG40160	uncharacterized protein	protein-coding
8196	chr3L	16176901	16177250	+	0	NA	TTS (NR_124954)	TTS (NR_124954)	265	NR_124953	19835183		NR_124953		CR45754	Dmel\CR45754	ncRNA	ncRNA
9670	chr3R	4419341	4419720	+	0	NA	promoter-TSS (NM_001043201)	promoter-TSS (NM_001043201)	48	NM_001300228	40560		NM_176397		CG32944	CG10532|CG9818|Dmel\CG32944	uncharacterized protein	protein-coding
6662	chr3L	4180631	4181200	+	0	NA	exon (NM_001169874, exon 5 of 6)	exon (NM_001169874, exon 5 of 6)	921	NM_139610	38502	Dm.22468	NM_139610		Teh2	CG15004|Dmel\CG15004|TEH2	tipE homolog 2	protein-coding
13560	chr4	1050911	1051730	+	0	NA	promoter-TSS (NM_001169362)	promoter-TSS (NM_001169362)	58	NM_166811	43828	Dm.1709	NM_079896		CaMKII	CAMKII|CAMKIIalpha|CAMKIId|CDPK1|CG18069|Ca2+/calmodulin-dependent protein kinase II|CaM|CaM II|CaM KII|CaM kinase|CaMK II|CaMK-II|Calcium/calmodulin-dependent protein kinase|Cam|CamKII|CamKIIalpha|Camkii|DCK|Dmel\CG18069|calcium/calmodulin-dependent protein kinase II|camKII|camkII|dCAMKII|dCaMKII|l(4)102EFb|l(4)16|l(4)ar	Calcium/calmodulin-dependent protein kinase II	protein-coding
14147	chrX	3968581	3969130	+	0	NA	promoter-TSS (NM_130732)	promoter-TSS (NM_130732)	-78	NR_123785	19835164		NR_123785		CR45481	Dmel\CR45481	ncRNA	ncRNA
10079	chr3R	6948651	6950100	+	0	NA	intron (NM_206446, intron 2 of 6)	intron (NM_206446, intron 2 of 6)	-16535	NM_206452	40835	Dm.3803	NM_206444		Antp	3.4|ANT-C|ANT-P|ANTC|ANTP|Ant|AntP|AntP1|Antp P1|Antp P2|Antp1|Aus|BG:DS07700.1|CG1028|DMANTPE1|DRO15DC96Z|DmAntp|Dmel\CG1028|Hu|Ns|Scx|antp|l(3)84Ba	Antennapedia	protein-coding
11173	chr3R	15245991	15246420	+	0	NA	TTS (NM_001104330)	TTS (NM_001104330)	1949	NM_176503	41840	Dm.1206	NM_079632		Hsc70-4	BAP74|Bap74|CG4264|Dmel\CG4264|E(csp)1545|E(nd)195|HSC-70|HSC4|HSC70|HSC70-4|Hsc-4|Hsc-70-4|Hsc4|Hsc4p|Hsc70|Hsp-c4|Hsp70|Q3KN45_DROME|anon-WO0118547.237|bs17d06.y1|chr3R:11070155..11070315|dHSP70|dHsp70|dhsc70|hsc4|hsc70|hsc70-4|hsp70|i190|l(3)03550|l(3)L3929|l(3)j7A4|mtHsp 70|scd	Heat shock protein cognate 4	protein-coding
153	chr2L	854101	854650	+	0	NA	promoter-TSS (NM_134708)	promoter-TSS (NM_134708)	-962	NM_134708	33266	Dm.5248	NM_134708		CG13949	BcDNA:AT06839|Dmel\CG13949	uncharacterized protein	protein-coding
9427	chr3R	121891	122190	+	0	NA	Intergenic	Intergenic	-445036	NM_001316563	26067052		NM_001316563		Myo81F	CG15831|CG40155|CG40204|CG41281|CG41518|CG41527|CG42621|CG42622|CG42623|CG42624|CG45784|Dmel\CG45784|Dmel_CG15831|Dmel_CG40155|Dmel_CG40204|Dmel_CG41281|Dmel_CG41518|Dmel_CG41527|Dmel_CG42621|Dmel_CG42622|Dmel_CG42623|Dmel_CG42624	Myosin 81F	protein-coding
1083	chr2L	8007941	8008280	+	0	NA	promoter-TSS (NM_135328)	promoter-TSS (NM_135328)	-900	NM_135328	34091	Dm.18230	NM_135328		Spn28Dc	CG7219|Dm-Spn28D|Dmel\CG7219|Spn28D|spn28D	Serpin 28Dc	protein-coding
8005	chr3L	15137231	15137550	+	0	NA	promoter-TSS (NM_140495)	promoter-TSS (NM_140495)	-456	NM_140495	39650	Dm.11998	NM_140495		CG12316	Dmel\CG12316	uncharacterized protein	protein-coding
8702	chr3L	20157041	20157620	+	0	NA	intron (NM_140925, intron 5 of 15)	GA-rich|Low_complexity|Low_complexity	-2660	NR_133281	26067269		NR_133281		CR45942	Dmel\CR45942	ncRNA	ncRNA
10637	chr3R	10709061	10709990	+	0	NA	promoter-TSS (NM_169355)	promoter-TSS (NM_169355)	-161	NM_169355	318700	Dm.26560	NM_169355		CG31373	CG6482|Dmel\CG31373|PDF	uncharacterized protein	protein-coding
504	chr2L	3872101	3872580	+	0	NA	TTS (NM_001169396)	TTS (NM_001169396)	118	NM_164564	319046	Dm.18349	NM_164564		CG31957	Dmel\CG31957	uncharacterized protein	protein-coding
2719	chr2L	21418311	21419330	+	0	NA	promoter-TSS (NM_001032209)	promoter-TSS (NM_001032209)	-114	NM_001032134	3772094		NM_001032134		His2B:CG33900	CG33900|Dmel\CG33900	histone H2B	protein-coding
8439	chr3L	18064681	18065110	+	0	NA	promoter-TSS (NM_001259893)	promoter-TSS (NM_001259893)	-199	NM_001259893	39999	Dm.21411	NM_079409		Eip75B	57B|75B|BcDNA:GM02640|CG8127|DmE75A|DmE75B|Dmel\CG8127|E75|E75-C|E75A|E75B|E75C|EP1121b|Eip75|Eip75 A|Eip75A|Mgn00274|NR1D3|Rev-Erb|anon-WO0172774.31|anon-WO0172774.32|dE75|eip75B|l(3)07041|l(3)j11A6|l(3)j12E8|l(3)j3A6|l(3)j5E1|l(3)neo25	Ecdysone-induced protein 75B	protein-coding
12413	chr3R	24270191	24270590	+	0	NA	intron (NM_001300572, intron 1 of 15)	intron (NM_001300572, intron 1 of 15)	843	NM_001014648	42889	Dm.7884	NM_079754		jar	95F|95F MHC|CG5695|Dm 95F|Dm95F|Dmel\CG5695|Dro95F|JAG|Jaguar|Jar|M6|MHC95F|MYOVI|Mhc95F|Myo1A|MyoVI|Myosin VI|dMyoVI|jag|ms(3)06746|myo VI|myosins VI	jaguar	protein-coding
13743	chrX	1040981	1041490	+	0	NA	exon (NM_001272187, exon 2 of 10)	exon (NM_001272187, exon 2 of 10)	-4989	NM_001042791	7354475	Dm.36756	NM_001042791		CG42259	C|Dmel\CG42259|anon-1Ea	uncharacterized protein	protein-coding
4313	chr2R	12339771	12340240	+	0	NA	TTS (NM_001169655)	TTS (NM_001169655)	1705	NM_001169655	36339	Dm.11206	NM_136919		Den1	CG8493|DEN1|Dmel\CG8493	Deneddylase 1	protein-coding
12197	chr3R	22720571	22721470	+	0	NA	TTS (NM_058023)	TTS (NM_058023)	130	NM_001275918	42687	Dm.22507	NM_170037		wge	CG17621|CG31151|CG4902|Dmel\CG31151	winged eye	protein-coding
7516	chr3L	11703681	11703960	+	0	NA	intron (NM_140241, intron 2 of 4)	intron (NM_140241, intron 2 of 4)	3935	NM_206339	39319	Dm.10803	NM_140241		CG11658	Dmel\CG11658|FBXO12|anon-WO0118547.413	uncharacterized protein	protein-coding
11931	chr3R	20977521	20978250	+	0	NA	promoter-TSS (NM_079699)	promoter-TSS (NM_079699)	-298	NM_079699	42481	Dm.2389	NM_079699		Calx	9C5|CALX|CALX1.1|CG5685|CalX|Dmel/Ncx|Dmel\CG5685|NCX|Ncx|anon-93ABa|calX|calx	Na/Ca-exchange protein	protein-coding
8603	chr3L	19292471	19293760	+	0	NA	promoter-TSS (NM_001300189)	promoter-TSS (NM_001300189)	-349	NM_001300189	40102	Dm.2224	NM_140847		Gbs-76A	149039_at|CG9619|Dmel\CG9619|GBS-76A	Glycogen binding subunit 76A	protein-coding
15825	chrX	17321701	17321990	+	0	NA	intron (NM_078662, intron 2 of 2)	intron (NM_078662, intron 2 of 2)	7264	NM_078662	32723	Dm.2611	NM_078662		B-H2	B|BH2|Bar|Bar-H2|BarH|Barh2|CG5488|Dmel\CG5488|bar-h2	BarH2	protein-coding
1196	chr2L	8747141	8747420	+	0	NA	Intergenic	Intergenic	4842	NM_001298832	19834846		NM_001298832		CG45307	Dmel\CG45307|lincRNA.77	uncharacterized protein	protein-coding
16333	chrX	21056731	21057850	+	0	NA	intron (NM_206800, intron 1 of 6)	intron (NM_206800, intron 1 of 6)	2744	NM_001272824	33083	Dm.7881	NM_134582		bves	BcDNA:SD21670|CG15448|CG1754|CG32513|Dmel\CG32513	bves	protein-coding
12340	chr3R	23827611	23828550	+	0	NA	TTS (NR_002078).2	TTS (NR_002078).2	210	NR_001599	3772520		NR_001599		snRNA:U1:21D	21E U1|CR31656|Dmel\CR31656|K5|U1|U1 21D|U1 snRNA|U1-1|U1-21.1|U1-21D|U14|U1:21D|U1a|U1a-21D|U1a1(AT)[[15]]|U1snRNA|U1snRNA21D|dU1|snRNA-U1-21.1|snRNA1|snRNA:U1	small nuclear RNA U1 at 21D	ncRNA
9637	chr3R	4269701	4270530	+	0	NA	exon (NM_001104202, exon 2 of 4)	exon (NM_001104202, exon 2 of 4)	3163	NM_141190	40538	Dm.1052	NM_141190		CG1092	Dmel\CG1092	CG1092	protein-coding
15841	chrX	17392441	17392960	+	0	NA	Intergenic	Intergenic	-4778	NM_001272713	32724	Dm.2610	NM_078663		B-H1	BH1|Bar|Bar H1|Bar-H1|BarH|BarHI|Barh1|CG5529|Dmel\CG5529|bar-h1|barH1|barh1	BarH1	protein-coding
2397	chr2L	19010121	19010400	+	0	NA	promoter-TSS (NM_136087)	promoter-TSS (NM_136087)	-606	NM_136087	35166	Dm.26839	NM_136087		robl37BC	CG15171|Dmel\CG15171|Robl37BC	robl37BC	protein-coding
9528	chr3R	2386151	2386590	+	0	NA	intron (NM_001316563, intron 18 of 21)	QUASIMODO2-I_DM|LTR|Gypsy	358430	NR_125326	19835739		NR_125325		CR45220	Dmel\CR45220	ncRNA	ncRNA
7218	chr3L	9372221	9372720	+	0	NA	promoter-TSS (NM_001031946)	promoter-TSS (NM_001031946)	27	NM_079270	39071	Dm.2801	NM_079270		Hsp67Bc	CG4190|Dm-HSP67Bc|Dmel18.0|Dmel\CG4190|HSP67|HSP67BC|HSP67Bc|HSPB8|Hsp-G3|Hsp67BC|Hspg3|gene 3|gene-3|gene3|gene5|hsp67B|small hsp locus 67B	Heat shock gene 67Bc	protein-coding
4493	chr2R	13476111	13476760	+	0	NA	promoter-TSS (NM_001259370)	promoter-TSS (NM_001259370)	-907	NM_001259370	12798442	Dm.37104	NM_001259370		CG43192	Dmel\CG43192|noncoding_6564|noncoding_6907	uncharacterized protein	protein-coding
4681	chr2R	14854821	14855670	+	0	NA	promoter-TSS (NM_137153)	promoter-TSS (NM_137153)	-184	NM_137153	36656	Dm.631	NM_137153		HPS1	CG12855|Dmel\CG12855|HPS|NP_610997|dHPS1	Hermansky-Pudlak Syndrome 1	protein-coding
5665	chr2R	22397201	22398160	+	0	NA	intron (NM_001299790, intron 1 of 2)	intron (NM_001299790, intron 1 of 2)	4379	NM_137823	37557	Dm.4607	NM_137823		babos	CG3624|CT12183|Dmel\CG3624	babos	protein-coding
7386	chr3L	10858371	10859640	+	0	NA	5' UTR (NM_001169942, exon 1 of 11)	5' UTR (NM_001169942, exon 1 of 11)	601	NM_001169942	39217	Dm.33568	NM_140155		tna	0583/02|CG7958|Dmel\CG7958|anon-WO0118547.590|l(3)L6731|l(3)S058302|l(3)rI075	tonalli	protein-coding
10335	chr3R	8812541	8812790	+	0	NA	TTS (NM_001275461)	TTS (NM_001275461)	914	NM_001170086	41057	Dm.6340	NM_141581		CG9837	Dmel\CG9837	CG9837	protein-coding
15708	chrX	16391091	16391970	+	0	NA	promoter-TSS (NM_132895)	promoter-TSS (NM_132895)	-92	NM_001298397	32607	Dm.3007	NM_132895		TH1	CG9984|Dmel\CG9984|NELF|NELF-D	TH1	protein-coding
4773	chr2R	15674181	15674600	+	0	NA	intron (NM_166108, intron 1 of 9)	intron (NM_166108, intron 1 of 9)	1563	NM_166107	44095	Dm.7727	NM_079952		fus	CG8205|Dmel\CG8205|E(cact[E10])7|cg8205	fusilli	protein-coding
1527	chr2L	11286821	11287090	+	0	NA	Intergenic	Intergenic	-1249	NM_135657	34566	Dm.26791	NM_135657		Osi21	CG14925|Dmel\CG14925|die4|diehard4	Osiris 21	protein-coding
3499	chr2R	6914411	6915190	+	0	NA	exon (NM_144058, exon 6 of 8)	exon (NM_144058, exon 6 of 8)	-8566	NM_136404	35604	Dm.11455	NM_136404		CG3358	Dmel\CG3358	CG3358	protein-coding
5369	chr2R	20062681	20063010	+	0	NA	Intergenic	Intergenic	4750	NR_124642	19835850		NR_124642		CR44631	Dmel\CR44631	ncRNA	ncRNA
6920	chr3L	6766851	6767820	+	0	NA	Intergenic	Intergenic	-4089	NM_168180	38751	Dm.4601	NM_139802		CG32392	CG10099|CG14912|Dmel\CG32392	uncharacterized protein	protein-coding
11771	chr3R	19509271	19509530	+	0	NA	intron (NM_001043260, intron 1 of 14)	intron (NM_001043260, intron 1 of 14)	140	NM_001043260	42327	Dm.16710	NM_001043256		Dys	CG17750|CG31175|CG34157|CG7240|CG7243|CG7344|DLP|DLP1|DLP186|DLP2|DLP3|DmDLP|DmDYS|Dmel\CG34157|Dp117|Dp186|Dp205|GI3046716|IDLP|det|dmDLP|dmDp186|dmDys|dys	Dystrophin	protein-coding
11142	chr3R	14894261	14894840	+	0	NA	promoter-TSS (NM_142146)	promoter-TSS (NM_142146)	-234	NM_142146	41803	Dm.31254	NM_142146		CG14860	Dmel\CG14860	uncharacterized protein	protein-coding
7063	chr3L	8175901	8176190	+	0	NA	promoter-TSS (NM_144350)	promoter-TSS (NM_144350)	-67	NM_144350	53438	Dm.1556	NM_144350		RecQ4	CG7487|DmRECQ4|Dmel\CG7487|RECQL4|cg7487|dRecQ4	RecQ4 helicase	protein-coding
1458	chr2L	10756541	10756820	+	0	NA	promoter-TSS (NM_164942)	promoter-TSS (NM_164942)	-355	NM_001298884	34485	Dm.3960	NM_135606		CG17124	Dmel\CG17124|anon-WO0118547.153	uncharacterized protein	protein-coding
11297	chr3R	16207261	16207530	+	0	NA	TTS (NR_125174)	TTS (NR_125174)	-1278	NR_125175	19835985		NR_125175		CR45640	Dmel\CR45640	ncRNA	ncRNA
1378	chr2L	10304241	10304560	+	0	NA	promoter-TSS (NM_135529)	promoter-TSS (NM_135529)	-453	NM_135529	44021	Dm.11450	NM_135529		nmd	CG5395|DmCG5395|Dmel\CG5395|Msp|Msp1|Nmd|anon-EST:Liang-1.79|clone 1.79|l(2)08774|ms(2)4|ms(2)ry4	no mitochondrial derivative	protein-coding
1612	chr2L	12055741	12056200	+	0	NA	promoter-TSS (NM_001103682)	promoter-TSS (NM_001103682)	15	NM_135698	34624	Dm.411	NM_135698		JhI-21	CG12317|Dmel\CG12317|JHI-21|Jhl-21	JhI-21	protein-coding
12724	chr3R	27034361	27034680	+	0	NA	intron (NM_001300623, intron 4 of 7)	intron (NM_001300623, intron 4 of 7)	-8411	NM_143269	43252	Dm.1349	NM_143269		CG6271	DmelL1|Dmel\CG6271	CG6271	protein-coding
775	chr2L	5955731	5956240	+	0	NA	TTS (NM_001273185)	TTS (NM_001273185)	481	NM_135128	33826	Dm.26739	NM_135128		CG13999	Dmel\CG13999	uncharacterized protein	protein-coding
4184	chr2R	11537111	11537940	+	0	NA	Intergenic	CpG	-9315	NM_165841	36240	Dm.22056	NM_078976		en	153867_at|Apa|CG9015|Dmel\CG9015|EN|En|EnR|Eng|Engr|Engrailed|Engrailed/Invected|Es|V|en1|spa2|spt	engrailed	protein-coding
12663	chr3R	26284271	26284540	+	0	NA	Intergenic	Intergenic	16115	NM_170267	43184	Dm.16449	NM_143214		CG6154	Dmel\CG6154	CG6154	protein-coding
3764	chr2R	8901111	8901780	+	0	NA	promoter-TSS (NM_165632)	promoter-TSS (NM_165632)	12	NM_165631	35881	Dm.2812	NM_078938		Ggamma1	CG8261|D-G[[gamma]]1|Dmel\CG8261|GNG13|G[[gamma1]]|G[[gamma]]|Gbetagamma|Gg1|Ggamma|Ggamma-1|bro4|dg1alpha|ggamma1|l(2)k08017	G protein gamma 1	protein-coding
882	chr2L	6620541	6621020	+	0	NA	intron (NM_001103630, intron 1 of 5)	intron (NM_001103630, intron 1 of 5)	920	NM_001103630	33925	Dm.27654	NM_001103630		DIP-iota	11320|CG11320|CT31597|Dmel\CG11320	Dpr-interacting protein iota	protein-coding
11394	chr3R	16684481	16686290	+	0	NA	intron (NM_080500, intron 1 of 1)	intron (NM_080500, intron 1 of 1)	-29723	NM_080515	42032	Dm.13706	NM_080515		modSP	CG10100|CG17557|CG31217|CT28389|Dm-SP|Dmel\CG31217|LDL|Ldlr|ModSP|SP172|SP53|Ser89E|W|X	modular serine protease	protein-coding
467	chr2L	3656951	3657770	+	0	NA	promoter-TSS (NM_205904)	promoter-TSS (NM_205904)	-407	NM_205904	44817	Dm.6584	NM_058139		for	142251_at|BcDNA:GM08338|CG10033|DG2|Dg2|Dmel\CG10033|FOR/PKG|For|PKG|Pkg2|Pkg24A|anon-WO0140519.260|anon-WO02059370.47|dg2|l(2)06860	foraging	protein-coding
5753	chr2R	23050761	23051210	+	0	NA	Intergenic	Intergenic	-4489	NM_206203	37657	Dm.30930	NM_137905		CG44252	CG30194|Dmel\CG44252	uncharacterized protein	protein-coding
10047	chr3R	6845111	6847640	+	0	NA	intron (NM_206443, intron 1 of 2)	intron (NM_206443, intron 1 of 2)	2130	NM_079524	40833	Dm.2481	NM_079524		Scr	BG:DS07876.2|CG1030|DmScr|Dmel\CG1030|Msc|SCR|l(3)84Af|scr	Sex combs reduced	protein-coding
7595	chr3L	12433901	12434150	+	0	NA	Intergenic	Intergenic	-1357	NM_079317	39418	Dm.941	NM_079317		toe	CG10704|Dmel\CG10704|Toe|anon-WO0172774.89	twin of eyg	protein-coding
13622	chrX	343311	343560	+	0	NA	intron (NM_001297805, intron 1 of 5)	intron (NM_001297805, intron 1 of 5)	394	NM_166840	30979	Dm.33579	NM_130483		CG3777	BEST:CK01670|CK01670|Dmel\CG3777|EG:125H10.1	CG3777	protein-coding
4475	chr2R	13299631	13300020	+	0	NA	exon (NM_137021, exon 1 of 4)	exon (NM_137021, exon 1 of 4)	226	NM_137021	36478	Dm.23918	NM_137021		CG17047	Dmel\CG17047	uncharacterized protein	protein-coding
9451	chr3R	821901	822170	+	0	NA	intron (NM_001316563, intron 1 of 21)	DMCR1A|LINE|CR1	254959	NM_001316563	26067052		NM_001316563		Myo81F	CG15831|CG40155|CG40204|CG41281|CG41518|CG41527|CG42621|CG42622|CG42623|CG42624|CG45784|Dmel\CG45784|Dmel_CG15831|Dmel_CG40155|Dmel_CG40204|Dmel_CG41281|Dmel_CG41518|Dmel_CG41527|Dmel_CG42621|Dmel_CG42622|Dmel_CG42623|Dmel_CG42624	Myosin 81F	protein-coding
3174	chr2R	4017241	4017780	+	0	NA	intron (NM_001015349, intron 2 of 4)	DMCR1A|LINE|CR1	3399	NM_001015349	3355064	Dm.28538	NM_001015349		Haspin	BcDNA:LD07633|CG40080|Dmel\CG40080|haspin	haspin	protein-coding
9722	chr3R	4736811	4737100	+	0	NA	promoter-TSS (NR_133326)	promoter-TSS (NR_133326)	-545	NR_133326	26067453		NR_133326		CR46137	Dmel\CR46137	ncRNA	ncRNA
8690	chr3L	20000361	20001550	+	0	NA	promoter-TSS (NM_001170008)	promoter-TSS (NM_001170008)	-133	NM_140912	40189	Dm.3607	NM_140912		Tom20	CG7654|Dmel\CG7654|TOM 20|TOM20|anon-WO0118547.225|dtom20	Translocase of outer membrane 20	protein-coding
392	chr2L	3022891	3024000	+	0	NA	promoter-TSS (NM_134893)	promoter-TSS (NM_134893)	219	NM_134894	33513	Dm.4165	NM_134894		CG3542	Dmel\CG3542|prp40	CG3542	protein-coding
6845	chr3L	5969181	5969550	+	0	NA	intron (NM_001274529, intron 1 of 2)	intron (NM_001274529, intron 1 of 2)	6642	NM_001274529	38674	Dm.860	NM_139749		CG10479	Dmel\CG10479	uncharacterized protein	protein-coding
3863	chr2R	9470411	9470990	+	0	NA	intron (NM_001299320, intron 4 of 17)	intron (NM_001299320, intron 4 of 17)	6472	NM_001299320	35974	Dm.3685	NM_136647		Camta	CG13952|CG13953|CG42332|CG8809|DmCAMTA|Dmel\CG42332|Dmel_CG13952|Dmel_CG13953|Dmel_CG8809|camta|dCAMTA	Calmodulin-binding transcription activator	protein-coding
9698	chr3R	4598011	4598940	+	0	NA	non-coding (NR_125066, exon 2 of 3)	non-coding (NR_125066, exon 2 of 3)	1274	NR_125065	19835543		NR_125065		CR44317	Dmel\CR44317|lincRNA.671	ncRNA	ncRNA
10181	chr3R	7902831	7903230	+	0	NA	promoter-TSS (NM_079546)	promoter-TSS (NM_079546)	-363	NM_079546	40932	Dm.2469	NM_079546		mRpS9	CG2957|Dmel\CG2957|MRP-S9	mitochondrial ribosomal protein S9	protein-coding
14807	chrX	8765221	8765830	+	0	NA	intron (NM_132277, intron 5 of 6)	intron (NM_132277, intron 5 of 6)	19828	NM_001272429	31813	Dm.3025	NM_132277		Lim1	BcDNA:GH04929|CG10760|CG11354|Dlim1|Dmel\CG11354|Lim|dLim1|dlim-1|dlim1|lim1	LIM homeobox 1	protein-coding
9211	chr3L	24327971	24328280	+	0	NA	intron (NM_001104200, intron 1 of 5)	PROTOP|DNA|P	3259	NM_001104200	5740633	Dm.27610	NM_001104200		nvd	CG40050|Dmel\CG40050|Nvd|nvd-Dm	neverland	protein-coding
1201	chr2L	8785491	8785910	+	0	NA	Intergenic	CpG	-3200	NM_001201805	10178945	Dm.37798	NM_001201805		CG42710	Dmel\CG42710|HDC01517	uncharacterized protein	protein-coding
4133	chr2R	11196801	11200180	+	0	NA	5' UTR (NM_134279, exon 1 of 7)	5' UTR (NM_134279, exon 1 of 7)	214	NM_134279	36171	Dm.4730	NM_057375		shn	BEST:SD06302|CG7734|Dmel\CG7734|EP(2)2359|EP2359|SD06302|SHN|Schnurri|Shn|l(2)04738|quo	schnurri	protein-coding
13956	chrX	2432791	2433390	+	0	NA	Intergenic	Intergenic	-4123	NM_080310	31227	Dm.5740	NM_080310		gt	CG7952|DM17|Dmel\CG7952|EG:BACH7M4.5|GIAN_DROME|GT|Giant|Gt|l(1)3Aa|l(1)giant	giant	protein-coding
9907	chr3R	5753031	5753420	+	0	NA	TTS (NM_141325)	TTS (NM_141325)	1549	NM_141325	40711	Dm.11568	NM_141325		CG2091	Dmel\CG2091	CG2091	protein-coding
1779	chr2L	13522641	13523290	+	0	NA	intron (NM_057977, intron 3 of 6)	TRANSPAC_I-int|LTR|Gypsy	-4876	NM_001032084	3772680	Dm.28554	NM_001032084		CG33640	Dmel\CG33640	uncharacterized protein	protein-coding
1568	chr2L	11516571	11517460	+	0	NA	promoter-TSS (NM_001032082)	promoter-TSS (NM_001032082)	66	NM_164967	34573	Dm.2056	NM_135661		Dlg5	CG6509|DLG5|Dmel\CG6509|LD32687|dlg5	Discs large 5	protein-coding
7190	chr3L	9072341	9073330	+	0	NA	promoter-TSS (NM_140029)	promoter-TSS (NM_140029)	-104	NM_001274684	39043	Dm.3721	NM_140028		CG4911	Dmel\CG4911|FBXO4	CG4911	protein-coding
12467	chr3R	24723231	24724190	+	0	NA	promoter-TSS (NR_003903)	promoter-TSS (NR_003903)	-116	NR_003903	5740487		NR_003903		snoRNA:Me18S-C1280	CR34688|Dmel\CR34688|Me18S-Cm1280	ncRNA	ncRNA
15480	chrX	14901731	14902010	+	0	NA	TTS (NM_132754)	TTS (NM_132754)	3679	NM_132754	32419	Dm.4199	NM_132754		CG9512	CT26924|Dmel\CG9512	CG9512	protein-coding
12951	chr3R	29297431	29298420	+	0	NA	promoter-TSS (NM_143433)	promoter-TSS (NM_143433)	-745	NM_143433	43467	Dm.27447	NM_143433		CG14506	Dmel\CG14506|cg14506	uncharacterized protein	protein-coding
15224	chrX	12321891	12322280	+	0	NA	exon (NM_001169261, exon 19 of 20)	exon (NM_001169261, exon 19 of 20)	47450	NM_001298222	19835642		NM_001298222		CG45603	Dmel\CG45603	uncharacterized protein	protein-coding
11225	chr3R	15619541	15619900	+	0	NA	Intergenic	BLOOD_I-int|LTR|Gypsy	-15748	NM_001260192	12798413	Dm.27305	NM_001260192		CG43335	CG5302|Dmel\CG43335|SPH73	uncharacterized protein	protein-coding
2772	chr2L	21536041	21536400	+	0	NA	promoter-TSS (NM_001032213).10	promoter-TSS (NM_001032213).10	-126	NM_001032128	3771838		NM_001032128		His1:CG33813	CG33813|Dmel\CG33813	histone H1	protein-coding
6668	chr3L	4229421	4231520	+	0	NA	intron (NM_079197, intron 1 of 2)	intron (NM_079197, intron 1 of 2)	-3168	NM_168069	38513	Dm.2799	NM_079197		ImpL2	CG15009|CT34862|Dmel\CG15009|GH28|IMP-L2|IMPL2|Imp-12|Imp-L2|ImpL-2	Ecdysone-inducible gene L2	protein-coding
10588	chr3R	10546431	10547170	+	0	NA	intron (NM_057230, intron 7 of 12)	CpG	-33667	NR_048368	12797882	Dm.38999	NR_048368		mir-4944	CR43532|Dmel\CR43532|dme-mir-4944	mir-4944 stem loop	ncRNA
7767	chr3L	13524961	13525440	+	0	NA	3' UTR (NM_001202166, exon 13 of 13)	3' UTR (NM_001202166, exon 13 of 13)	-5595	NM_140405	39525	Dm.13623	NM_140405		CG10710	Dmel\CG10710	uncharacterized protein	protein-coding
6136	chr3L	318691	320210	+	0	NA	5' UTR (NM_080083, exon 1 of 12)	5' UTR (NM_080083, exon 1 of 12)	434	NM_001274274	45374	Dm.1632	NM_080083		fwd	CG7004|Dmel\CG7004|Fwd|PI4K|anon-WO0118547.259	four wheel drive	protein-coding
7697	chr3L	13040861	13042190	+	0	NA	promoter-TSS (NM_168537)	promoter-TSS (NM_168537)	-231	NM_001300126	39484	Dm.951	NM_079329		RpS4	CG11276|Dmel\CG11276|RPS4|Rp S4|SX4|anon-EST:Posey270|rpS4	Ribosomal protein S4	protein-coding
4485	chr2R	13435511	13436290	+	0	NA	TTS (NM_137030)	TTS (NM_137030)	1655	NM_001144184	36488	Dm.7647	NM_137029		CG42321	CG17034|CG30061|DmCG42321|Dmel\CG42321|Dmel_CG17034|Dmel_CG30061|anon-WO0153538.54	uncharacterized protein	protein-coding
3104	chr2R	2847101	2847550	+	0	NA	promoter-TSS (NM_001170366)	promoter-TSS (NM_001170366)	-617	NM_001170366	5740475	Dm.31659	NM_001110899		CG41378	Dmel\CG41378	uncharacterized protein	protein-coding
9094	chr3L	23013631	23013880	+	0	NA	intron (NM_001259961, intron 10 of 27)	intron (NM_001259961, intron 10 of 27)	15383	NM_001043156	40515	Dm.2496	NM_079494		nrm	CG32458|CG41452|CG43079|CG8779|CT16082|Dmel\CG43079|Dmel_CG32458|Dmel_CG41452|Dmel_CG8779	neuromusculin	protein-coding
13212	chr3R	31193171	31193540	+	0	NA	promoter-TSS (NM_079865)	promoter-TSS (NM_079865)	-7	NM_079865	43687	Dm.1899	NM_079865		bnk	Bnk|CG1480|Dmel\CG1480	bottleneck	protein-coding
657	chr2L	5052341	5053900	+	0	NA	promoter-TSS (NM_205909)	promoter-TSS (NM_205909)	-26	NM_080095	45682	Dm.1462	NM_080095		eIF-3p40	BcDNA:GM14618|CG9124|Dmel\CG9124|Q9U9Q4|eIF-3|eIF3-S3|eIF3h|eIf3-p44|l(2)k09003	Eukaryotic initiation factor 3 p40 subunit	protein-coding
593	chr2L	4588581	4589210	+	0	NA	intron (NM_001258946, intron 1 of 46)	intron (NM_001258946, intron 1 of 46)	3068	NM_001273106	318824	Dm.20530	NM_001258946		dpy	BcDNA:SD02173|CG15637|CG31724|CG31725|CG31726|CG31727|CG31964|CG31965|CG31966|CG31967|CG31968|CG33000|CG33086|CG33196|CR33195|CT35799|DP|DPY|Dmel\CG33196|Dp|Mur24F|Q8IQ18_DROME|SP460|dp|l(2)24Fd|olv[D]	dumpy	protein-coding
12520	chr3R	25094671	25095430	+	0	NA	promoter-TSS (NM_079772)	promoter-TSS (NM_079772)	38	NM_079772	43011	Dm.24089	NM_079772		fd96Cb	CG11922|Dmel\CG11922|Dmfd5|FD5|fd5	forkhead domain 96Cb	protein-coding
2430	chr2L	19176491	19176750	+	0	NA	3' UTR (NM_206004, exon 3 of 3)	3' UTR (NM_206004, exon 3 of 3)	5082	NM_136107	35198	Dm.27707	NM_136107		CG17568	Dmel\CG17568	uncharacterized protein	protein-coding
6575	chr3L	3587961	3588670	+	0	NA	intron (NM_001274444, intron 4 of 10)	intron (NM_001274444, intron 4 of 10)	-5508	NR_002270	3772175		NR_002270		snRNA:U7	63E-F U7|CR33504|Dmel\CR33504|U7|U7 snRNA|U7snRNA	small nuclear RNA U7	ncRNA
15411	chrX	13900071	13900730	+	0	NA	intron (NM_001258732, intron 4 of 8)	intron (NM_001258732, intron 4 of 8)	32943	NM_001201660	32353	Dm.17448	NM_132704		mamo	CG11071|CG11072|CG11075|CG11082|CG32606|CG32611|CG34346|CG44132|CG45477|CR44656|Dmel\CG45477|Dmel_CG11071|Dmel_CG11072|Dmel_CG32606|Dmel_CG32611|Dmel_CG34346|Dmel_CG44132|lincRNA.990	maternal gene required for meiosis	protein-coding
9431	chr3R	345661	346000	+	0	NA	Intergenic	DM176_I-int|LTR|Gypsy	-221246	NM_001316563	26067052		NM_001316563		Myo81F	CG15831|CG40155|CG40204|CG41281|CG41518|CG41527|CG42621|CG42622|CG42623|CG42624|CG45784|Dmel\CG45784|Dmel_CG15831|Dmel_CG40155|Dmel_CG40204|Dmel_CG41281|Dmel_CG41518|Dmel_CG41527|Dmel_CG42621|Dmel_CG42622|Dmel_CG42623|Dmel_CG42624	Myosin 81F	protein-coding
16262	chrX	20511241	20511750	+	0	NA	promoter-TSS (NM_001169338)	promoter-TSS (NM_001169338)	-49	NM_134553	33049	Dm.12215	NM_134553		CG1812	Dmel\CG1812	CG1812	protein-coding
3791	chr2R	9094831	9096520	+	0	NA	promoter-TSS (NR_003789)	promoter-TSS (NR_003789)	-10	NR_002540	3772298		NR_002540		snoRNA:Or-aca5	CR33637|Dm-227|DmOr_aca5|DmOr_aca5 snoRNA|DmOr_aca5(SnoR227)|Dmel\CR33637|Or-aca5|chr2R:4607488..4607590|snoR227|snoRNA:227	ncRNA	ncRNA
9501	chr3R	2046921	2047430	+	0	NA	intron (NM_001316563, intron 16 of 21)	DM297_I-int|LTR|Gypsy	-181167	NR_133318	26067438		NR_133318		CR46122	Dmel\CR46122	ncRNA	ncRNA
15823	chrX	17316961	17317420	+	0	NA	intron (NM_078662, intron 1 of 2)	intron (NM_078662, intron 1 of 2)	2609	NM_078662	32723	Dm.2611	NM_078662		B-H2	B|BH2|Bar|Bar-H2|BarH|Barh2|CG5488|Dmel\CG5488|bar-h2	BarH2	protein-coding
7206	chr3L	9268501	9268860	+	0	NA	intron (NM_001274692, intron 7 of 16)	intron (NM_001274692, intron 7 of 16)	16702	NM_001274693	44484	Dm.1636	NM_080016		GluRIB	CG42509|CG43743|CG4481|DGluR-IB|Dm_3L:43677|DmelGlu-R1B|Dmel\CG43743|Dmel_CG42509|Dmel_CG4481|Glu-R1B|Glu-RIB|GluRIb|dglur-IB	Glutamate receptor IB	protein-coding
2127	chr2L	16444511	16445100	+	0	NA	promoter-TSS (NM_057910)	promoter-TSS (NM_057910)	-473	NM_057910	34978	Dm.2253	NM_057910		Idgf1	BG:DS02780.5|CG4472|DmIDGF1|Dmel\CG4472|IDGF|IDGF-1|IDGF1|idgf1|ldgf1	Imaginal disc growth factor 1	protein-coding
11792	chr3R	19804141	19804760	+	0	NA	intron (NM_001300482, intron 2 of 5)	intron (NM_001300482, intron 2 of 5)	20928	NM_142575	42355	Dm.16700	NM_142575		CG11453	Dmel\CG11453	uncharacterized protein	protein-coding
3540	chr2R	7239801	7240480	+	0	NA	Intergenic	LINEJ1_DM|LINE|Jockey	-5227	NM_078923	35644	Dm.2588	NM_078923		Or43a	43B.1|43B1|43a|AN14|CG1854|DOR43B.1|DOR43a|DOR87|Dmel\CG1854|Dor87|OR43a|Or|Or43A|Or43B.1|Or87|dor87|or43a	Odorant receptor 43a	protein-coding
15453	chrX	14582811	14583230	+	0	NA	promoter-TSS (NM_132737)	promoter-TSS (NM_132737)	-38	NM_078598	32395	Dm.25389	NM_078598		mRpS25	25mRps|CG14413|Dmel\CG14413|MRP-S25|MrpS25	mitochondrial ribosomal protein S25	protein-coding
7005	chr3L	7434871	7435800	+	0	NA	promoter-TSS (NM_139864)	promoter-TSS (NM_139864)	-145	NM_001274588	38831	Dm.3545	NM_139864		Rac2	CG8556|D-Rac 2|D-Rac2|DRac2|DRacB|DmRAC2|Dmel\CG8556|Drac1b|Drac2|P48554|Rac|Rac GTPase|Rac-2|Rac1|Rac1b|RacB|rac2	Rac2	protein-coding
13339	chr4	25141	25390	+	0	NA	Intergenic	PROTOP_A|DNA|P	-17509	NR_123741	19834809		NR_123741		CR45124	Dmel\CR45124	ncRNA	ncRNA
9158	chr3L	23546781	23547040	+	0	NA	Intergenic	Intergenic	-7683	NM_001043163	3355150	Dm.33791	NM_001043162		AGO3	Ago-3|Ago3|BEST:LD15785|CG40300|Dmel\CG40300|ago3|dAgo3	Argonaute 3	protein-coding
9929	chr3R	6055321	6055590	+	0	NA	exon (NM_141353, exon 3 of 4)	exon (NM_141353, exon 3 of 4)	-1927	NR_125081	19835507		NR_125081		CR44921	Dmel\CR44921	ncRNA	ncRNA
8741	chr3L	20453991	20454570	+	0	NA	promoter-TSS (NR_003876)	promoter-TSS (NR_003876)	34	NR_003875	5740800		NR_003875		snoRNA:Me18S-U1356b	CR34645|Dmel\CR34645|Me18S-Um1356b	ncRNA	ncRNA
13070	chr3R	30052451	30053300	+	0	NA	promoter-TSS (NM_143510)	promoter-TSS (NM_143510)	203	NM_001276170	43576	Dm.4512	NM_143511		CG7946	Dmel\CG7946	CG7946	protein-coding
3201	chr2R	4470471	4471930	+	0	NA	promoter-TSS (NM_001042973)	promoter-TSS (NM_001042973)	-140	NM_001169580	3355013	Dm.1704	NM_001042973		Gprk1	CG40129|CT4320|Dmel\CG40129|GPRK1|Gprk-1|RK|Rok|gprk1	G protein-coupled receptor kinase 1	protein-coding
12851	chr3R	28532391	28532930	+	0	NA	intron (NM_176574, intron 1 of 15)	intron (NM_176574, intron 1 of 15)	7664	NM_001170290	43872	Dm.7007	NM_176574		Ppn	CG1540|CG18436|CG33103|CT3186|CT41988|Dmel\CG33103|ppl|ppn	Papilin	protein-coding
5199	chr2R	18665981	18666510	+	0	NA	promoter-TSS (NM_176224)	promoter-TSS (NM_176224)	-453	NM_176224	318894		NM_176224		CG33136	Dmel\CG33136|NEST:bs04e10	uncharacterized protein	protein-coding
6173	chr3L	612831	614500	+	0	NA	Intergenic	Intergenic	2981	NR_124744	19834793		NR_124744		CR42719	BcDNA:SD03580|CG32345|CG42719|Dmel\CR42719	ncRNA	ncRNA
7109	chr3L	8512541	8512860	+	0	NA	promoter-TSS (NM_139976)	promoter-TSS (NM_139976)	-67	NM_139976	38971	Dm.18879	NM_139976		CG6765	Dmel\CG6765	CG6765	protein-coding
14667	chrX	7933081	7934180	+	0	NA	promoter-TSS (NM_001272387)	promoter-TSS (NM_001272387)	-112	NM_167137	47218	Dm.38448	NM_080145		RpS14a	CG1524|Dmel\CG1524|RPS14A|Rp S14a|RpS14|RpS14A|S14|S14a|anon-EST:Posey115|anon-EST:Posey131|anon-EST:Posey154|anon-EST:Posey77|anon-WO03040301.136|anon-WO03040301.138|rpS14A	Ribosomal protein S14a	protein-coding
11907	chr3R	20763041	20763340	+	0	NA	promoter-TSS (NM_169923)	promoter-TSS (NM_169923)	-821	NM_169923	46155	Dm.29838	NM_169923		CG31195	Dmel\CG31195|l(3)03806	uncharacterized protein	protein-coding
13439	chr4	469421	469800	+	0	NA	3' UTR (NM_001272127, exon 14 of 14)	3' UTR (NM_001272127, exon 14 of 14)	2113	NM_001347760	3772538	Dm.13908	NM_001347760		CG33941	BcDNA:GM01028|CG13303|CR33941|CT32596|Dmel\CG33941|MRE3|pncr013:4	uncharacterized protein	protein-coding
21	chr2L	90031	90460	+	0	NA	Intergenic	Intergenic	-2858	NM_001272860	45339	Dm.1799	NM_080081		net	CG11450|Dmel\CG11450|Group IId|Shout|bHLHc42|shout	net	protein-coding
9798	chr3R	5094321	5094790	+	0	NA	Intergenic	CpG	-7483	NM_001259993	40616	Dm.24160	NM_079507		corto	7128|CG2530|CP-1|Ccf|Corto|Dmel\CG2530|anon-WO02059370.59|ccf|l(3)07128|l(3)neo31|l(3)neo32	corto	protein-coding
11413	chr3R	16762501	16763020	+	0	NA	intron (NR_002034, intron 1 of 2)	intron (NR_002034, intron 1 of 2)	10429	NR_002035	3772220		NR_002032		bxd	CR31273|CR31277|Dmel\CR31273	bithoraxoid	ncRNA
12346	chr3R	23856421	23857410	+	0	NA	intron (NM_001316615, intron 13 of 13)	NOMAD_I-int|LTR|Gypsy	2715	NR_002078	3772037	Dm.34169	NR_002078		snRNA:U1:95Ca	95C U1|CR31341|DMU1951|Dmel\CR31341|K5|U1|U1 snRNA|U1-95.1|U1-95Ca|U1951|U1:95C|U1:95Ca|U1a|U1a-95Ca|U1snRNA|U1snRNA 95.1|U1snRNA95Ca|snRNA-U1-95.1|snRNA:U1|u1a	small nuclear RNA U1 at 95Ca	ncRNA
1198	chr2L	8764571	8764930	+	0	NA	TTS (NM_135406)	TTS (NM_135406)	3960	NM_001298833	34203		NM_135406		LManIII	CG9463|Dmel\CG9463	Lysosomal alpha-mannosidase III	protein-coding
10492	chr3R	9726411	9726690	+	0	NA	promoter-TSS (NM_079572)	promoter-TSS (NM_079572)	-935	NM_001300333	41181		NM_079572		hyd	CG9484|Dmel\CG9484|HYD|Hyd|NP_524296.2|UBE 3A|c43|l(3)85Ea|l(3)C43|l(3)C43-3|l(3)SG33|l(3)c43|l[[3]]c43	hyperplastic discs	protein-coding
10863	chr3R	12627141	12628920	+	0	NA	promoter-TSS (NM_001170126)	promoter-TSS (NM_001170126)	-1	NM_141957	41551	Dm.5934	NM_141957		Snx3	CG6359|DmSNX3|Dmel\CG6359|Dsnx3|lincRNA.S6645|snx3	Sorting nexin 3	protein-coding
670	chr2L	5218951	5219270	+	0	NA	TTS (NM_135071)	TTS (NM_135071)	856	NM_135071	33752	Dm.14427	NM_135071		TpnC25D	BcDNA:RE53289|CG6514|DmTpnC25D|DmTpnCII|Dmel\CG6514|TNC25D|TnC|Tnc5|TpnC II|TpnCII|anon-EST:Posey103	Troponin C at 25D	protein-coding
8742	chr3L	20472811	20473930	+	0	NA	promoter-TSS (NM_176371)	promoter-TSS (NM_176371)	2	NM_001202213	50105	Dm.1544	NM_144022		CG32428	CG13249|CG5145|Dmel\CG32428	uncharacterized protein	protein-coding
13178	chr3R	30835551	30835940	+	0	NA	intron (NM_001276201, intron 2 of 3)	intron (NM_001276201, intron 2 of 3)	7926	NM_001276201	43655	Dm.13761	NM_143571		CG15544	Dmel\CG15544	uncharacterized protein	protein-coding
1580	chr2L	11804491	11804810	+	0	NA	intron (NM_001273461, intron 1 of 7)	(G)n|Simple_repeat|Simple_repeat	4322	NM_057897	34592	Dm.3562	NM_057895		crol	CG14938|Crol|Dmel\CG14938|ORE-15|anon-EST:Liang-1.74|anon-EST:Liang-2.48|clone 1.74|clone 2.48|crol alpha|crol beta|crol gamma|l(2)04418|l(2)s2346	crooked legs	protein-coding
2046	chr2L	15751781	15752390	+	0	NA	promoter-TSS (NM_080190)	promoter-TSS (NM_080190)	-178	NM_080190	48782	Dm.1748	NM_080190		Mtr4	BG:DS09217.2|BcDNA:GH07290|CG4152|Dmel\CG4152|L(2)35Df|br44|cg4152|dMtr4|l(2)35Df|l(2)br44|l(2)k14422|l(2)k14423|l.2.35Df|lethal(2)35Df	Mtr4 helicase	protein-coding
9575	chr3R	3285211	3285640	+	0	NA	Intergenic	Gypsy12_LTR|LTR|Gypsy	-21843	NM_001316564	26067051		NM_001316564		Pzl	CG40188|CG40232|CG40249|CG40328|CG41056|CG41238|CG41369|CG42617|CG42618|CG45783|CR41056|Dmel\CG45783|Dmel_CG40188|Dmel_CG40249|Dmel_CG41056|Dmel_CG41238|Dmel_CG41369|Dmel_CG42617|Dmel_CG42618|Dmel_CR41056	Piezo-like	protein-coding
7882	chr3L	14408721	14411000	+	0	NA	promoter-TSS (NM_140446)	promoter-TSS (NM_140446)	79	NM_001274910	39581	Dm.2674	NM_079344		stwl	84|CG3836|Dmel\CG3836|Stwl|fs(3)02024|snw	stonewall	protein-coding
16399	chrX	21656891	21657140	+	0	NA	intron (NR_133535, intron 2 of 2)	intron (NR_133535, intron 2 of 2)	25124	NR_133543	26067356		NR_133534		flam	COM|COM/flam|CR46037|Dmel\CR46037|lincRNA.1041	flamenco	ncRNA
9574	chr3R	3283911	3284250	+	0	NA	Intergenic	Gypsy12_LTR|LTR|Gypsy	-20498	NM_001316564	26067051		NM_001316564		Pzl	CG40188|CG40232|CG40249|CG40328|CG41056|CG41238|CG41369|CG42617|CG42618|CG45783|CR41056|Dmel\CG45783|Dmel_CG40188|Dmel_CG40249|Dmel_CG41056|Dmel_CG41238|Dmel_CG41369|Dmel_CG42617|Dmel_CG42618|Dmel_CR41056	Piezo-like	protein-coding
1973	chr2L	15096741	15097080	+	0	NA	TTS (NM_001273530)	TTS (NM_001273530)	-12495	NM_135895	34887	Dm.26814	NM_135895		CG15269	BG:DS04929.3|DS04929.3|Dmel\CG15269	uncharacterized protein	protein-coding
2202	chr2L	17243921	17244930	+	0	NA	intron (NM_135986, intron 2 of 6)	intron (NM_135986, intron 2 of 6)	2192	NR_124322	19835555		NR_124322		CR44396	Dmel\CR44396	ncRNA	ncRNA
14291	chrX	5041991	5042910	+	0	NA	intron (NR_123794, intron 2 of 3)	intron (NR_123794, intron 2 of 3)	-5823	NM_001169202	31429	Dm.1677	NM_080338		ovo	CG15467|CG6824|Dmel\CG6824|Fs(1)K1103|Fs(1)K1237|Fs(1)K155|OVO|Ovo|Ovo-D|Shv|Svb|Svb/Ovo|fs(1)K1237|fs(1)M1|fs(1)M38|ovo/shavenbaby|ovo/svb|ovoD|svb	ovo	protein-coding
5303	chr2R	19645571	19646510	+	0	NA	TTS (NM_001274166)	TTS (NM_001274166)	1605	NM_137592	37257	Dm.23941	NM_137592		CG15905	Dmel\CG15905	uncharacterized protein	protein-coding
3378	chr2R	6085041	6085870	+	0	NA	promoter-TSS (NM_165459)	promoter-TSS (NM_165459)	-19	NM_165458	35539	Dm.7281	NM_136359		Ars2	CG7843|Dmel\CG7843|anon-WO0118547.166	Arsenic resistance protein 2	protein-coding
10670	chr3R	11210951	11212120	+	0	NA	TTS (NM_141792)	TTS (NM_141792)	1288	NM_141791	41341	Dm.9988	NM_141791		Tctp	CG4800|Dmel\CG4800|TCTP|dTCTP	Translationally controlled tumor protein	protein-coding
14372	chrX	5862721	5863350	+	0	NA	Intergenic	(CAA)n|Simple_repeat|Simple_repeat	2116	NM_001258610	12798120		NM_001258610		CG43137	Dmel\CG43137|lincRNA.952	uncharacterized protein	protein-coding
12568	chr3R	25471831	25472320	+	0	NA	intron (NM_206570, intron 1 of 11)	intron (NM_206570, intron 1 of 11)	983	NM_170656	47220	Dm.1740	NM_080146		Fur1	CG10772|Dfur1|Dfurin1|Dmel\CG10772|Furin|Furl|Klip1|dFur1|dFurin 1|dKLIP-1|fur-1|fur1|fur[1]|furin|l(3)rL205	Furin 1	protein-coding
2835	chr2L	21852111	21852370	+	0	NA	Intergenic	Intergenic	-2854	NR_124422	19835662		NR_124422		CR44917	Dmel\CR44917	ncRNA	ncRNA
15878	chrX	17712761	17713920	+	0	NA	intron (NM_001298457, intron 1 of 8)	intron (NM_001298457, intron 1 of 8)	3196	NM_001298457	32754	Dm.197	NM_133012		CG42684	CG15816|CG32559|CG32560|CG42270|CG5898|CG5960|Dmel\CG42684|Dmel_CG15816|Dmel_CG32559|Dmel_CG32560|Dmel_CG42270|FBpp0112350	uncharacterized protein	protein-coding
808	chr2L	6157021	6157470	+	0	NA	Intergenic	Intergenic	-2104	NM_164687	318866	Dm.21066	NM_164686		CG31639	Dmel\CG31639|NEST:bs21c05|NEST:bs29d12	uncharacterized protein	protein-coding
8276	chr3L	16841811	16842730	+	0	NA	promoter-TSS (NM_079396)	promoter-TSS (NM_079396)	-24	NM_079396	39881	Dm.2651	NM_079396		TSG101	CG9712|DmTSG101|Dmel\CG9712|ESCRT-I|Ept|Tsg1-1|Tsg101|burs|dTSg101|dTsg101|dVps23|ept|tsg101|vps23	Tumor susceptibility gene 101	protein-coding
15309	chrX	13002141	13002390	+	0	NA	intron (NM_001298248, intron 1 of 18)	intron (NM_001298248, intron 1 of 18)	2518	NM_132618	32249	Dm.26620	NM_132618		CG15719	Dmel\CG15719	uncharacterized protein	protein-coding
3114	chr2R	2961161	2961430	+	0	NA	intron (NM_001276231, intron 3 of 6)	S2_DM|DNA|TcMar-Tc1	6049	NM_001015389	3355102	Dm.4693	NM_001015389		Scp1	BcDNA:GH15296|CG15848|Dcabp-A.1|Dmel\CG15848|SCP|SCP1	Sarcoplasmic calcium-binding protein 1	protein-coding
6026	chr2R	25053281	25053810	+	0	NA	Intergenic	(CAGGGA)n|Simple_repeat|Simple_repeat	-1214	NM_079138	38004	Dm.5850	NM_079138		gsb-n	BSH-4|BSH4|CG2692|Dmel\CG2692|Gsb-n|Gsb-p|GsbN|Gsbn|gsb|gsb-neuro|gsb-p|gsbN|gsbn|gsbp	gooseberry-neuro	protein-coding
3415	chr2R	6411401	6411760	+	0	NA	Intergenic	DOC6_DM|LINE|Jockey	90192	NR_133106	26067392		NR_133106		CR46075	Dmel\CR46075|lincRNA.255	ncRNA	ncRNA
14901	chrX	9512571	9512900	+	0	NA	TTS (NM_001038749)	TTS (NM_001038749)	1211	NM_001038749	3885648	Dm.30167	NM_001038749		CG34028	BP1074|Dmel\CG34028	uncharacterized protein	protein-coding
10881	chr3R	12858401	12858660	+	0	NA	promoter-TSS (NM_141977)	promoter-TSS (NM_141977)	716	NM_176487	41579	Dm.7950	NM_141977		CG10126	CT28495|Dmel\CG10126	uncharacterized protein	protein-coding
8419	chr3L	17972501	17972830	+	0	NA	intron (NM_001259892, intron 4 of 7)	CpG	-1226	NM_079409	39999	Dm.21411	NM_079409		Eip75B	57B|75B|BcDNA:GM02640|CG8127|DmE75A|DmE75B|Dmel\CG8127|E75|E75-C|E75A|E75B|E75C|EP1121b|Eip75|Eip75 A|Eip75A|Mgn00274|NR1D3|Rev-Erb|anon-WO0172774.31|anon-WO0172774.32|dE75|eip75B|l(3)07041|l(3)j11A6|l(3)j12E8|l(3)j3A6|l(3)j5E1|l(3)neo25	Ecdysone-induced protein 75B	protein-coding
13756	chrX	1142731	1143050	+	0	NA	Intergenic	(AT)n|Simple_repeat|Simple_repeat	-2754	NM_130527	31057	Dm.23763	NM_130527		CG14628	Dmel\CG14628|EG:BACR42I17.12|cg14628	uncharacterized protein	protein-coding
7608	chr3L	12484801	12485620	+	0	NA	promoter-TSS (NM_001031954)	promoter-TSS (NM_001031954)	-175	NM_001104122	39421		NM_001104122		CG10663	CT29868|Dmel\CG10663|SP30	uncharacterized protein	protein-coding
3559	chr2R	7407011	7408200	+	0	NA	promoter-TSS (NR_048053)	promoter-TSS (NR_048053)	214	NM_165521	35660	Dm.7246	NM_136429		Eaf	CG11166|CG1706|Dmel\CG11166|EP(2)2475|LD35207|dEaf	ELL-associated factor	protein-coding
3914	chr2R	9870571	9871100	+	0	NA	promoter-TSS (NM_001273908)	promoter-TSS (NM_001273908)	-468	NM_001273908	47272	Dm.1629	NM_080149		cbx	CG10536|Cbx|Dmel\CG10536|Ft1|ms(2)05704|ms(2)46C	crossbronx	protein-coding
680	chr2L	5242621	5243100	+	0	NA	promoter-TSS (NM_175977)	promoter-TSS (NM_175977)	-240	NM_175977	33753	Dm.7011	NM_175975		tkv	Atkv|Atr25D|Brk25D|Brk25D1|Brk25D2|CG14026|Dmel\CG14026|Dtfr|STK-A|TKV|TKV1|Tkv|dtfr|kv|l(2)04415|l(2)25Da|str|tkv1|tkva	thickveins	protein-coding
16411	chrX	22383411	22384190	+	0	NA	Intergenic	HOBO|DNA|hAT-hobo	-60427	NM_001298593	33128	Dm.17217	NM_134614		CG14621	Dmel\CG14621|Slc35e1|lincRNA.1043	uncharacterized protein	protein-coding
5618	chr2R	21900791	21901560	+	0	NA	intron (NM_137775, intron 2 of 6)	CpG	17863	NM_137775	5740472	Dm.32432	NM_137775		Fili	CG13487|CG34368|CG4054|CT13464|CT32855|Dmel\CG34368|Dmel_CG13487|Dmel_CG4045|Dmel_CG4054	Fish-lips	protein-coding
11617	chr3R	18223401	18224030	+	0	NA	promoter-TSS (NM_142437)	promoter-TSS (NM_142437)	-7	NM_142437	42183	Dm.4339	NM_142437		Non3	CG7993|Dmel\CG7993	Novel nucleolar protein 3	protein-coding
5763	chr2R	23100471	23100780	+	0	NA	promoter-TSS (NM_137913)	promoter-TSS (NM_137913)	-147	NM_137913	37669	Dm.27783	NM_137913		RpL37b	CG9873|Dmel\CG9873|Rpl37b	Ribosomal protein L37b	protein-coding
15797	chrX	17159581	17161320	+	0	NA	5' UTR (NM_001042818, exon 1 of 10)	5' UTR (NM_001042818, exon 1 of 10)	444	NM_001298435	32703	Dm.191	NM_001042818		baz	BAZ|Baz|Baz/Par-3|Baz/Par3|Bazooka|CG5055|D-Par3|D-par3|Dmel\CG5055|PAR-3|PAR3|Par-3|Par3|dPar-3|l(1)G0484|par-3|par3	bazooka	protein-coding
16340	chrX	21158641	21158930	+	0	NA	Intergenic	Intergenic	-11744	NM_001298585	19835236		NM_001298585		CG45154	CR45154|Dmel\CG45154	uncharacterized protein	protein-coding
5094	chr2R	18047821	18048110	+	0	NA	promoter-TSS (NM_001038868)	promoter-TSS (NM_001038868)	-143	NM_001038868	3885597		NM_001038868		CG34005	BP1019|Dmel\CG34005	uncharacterized protein	protein-coding
10804	chr3R	12256561	12257590	+	0	NA	TTS (NM_141914)	TTS (NM_141914)	563	NR_133380	26067514		NR_133380		CR46203	Dmel\CR46203|lincRNA.756	ncRNA	ncRNA
15129	chrX	11592431	11593070	+	0	NA	Intergenic	Intergenic	-7088	NM_167290	32109	Dm.1673	NM_080345		rho-4	CG1697|DmRho4|Dmel\CG1697|Rho-4|Rho-related [10C6]|rho 4|rho4	rhomboid-4	protein-coding
16006	chrX	18634721	18635090	+	0	NA	promoter-TSS (NM_167626)	promoter-TSS (NM_167626)	3	NM_167626	32849	Dm.13466	NM_167626		wgn	CG6531|Dmel\CG6531|TNFR|Wgn|vader	wengen	protein-coding
13688	chrX	636421	637560	+	0	NA	intron (NM_001297824, intron 1 of 5)	intron (NM_001297824, intron 1 of 5)	548	NM_001297824	31012		NM_057406		su(sable)	CG6222|Dmel\CG6222|EG:115C2.3|su(s)|su-s|su-v|su[2]-s	suppressor of sable	protein-coding
3993	chr2R	10315821	10316420	+	0	NA	intron (NM_136731, intron 1 of 11)	intron (NM_136731, intron 1 of 11)	2229	NM_136731	36089	Dm.11018	NM_136731		Ndg	BEST:CK00552|CG12908|CT32053|Dmel\CG12908|ndg	Nidogen/entactin	protein-coding
3033	chr2R	1590341	1590750	+	0	NA	promoter-TSS (NM_001110548)	promoter-TSS (NM_001110548)	-25	NM_001110546	3355069	Dm.6055	NM_001015354		CG17691	Dmel\CG17691	uncharacterized protein	protein-coding
13022	chr3R	29748531	29749390	+	0	NA	promoter-TSS (NM_170426)	promoter-TSS (NM_170426)	-91	NM_079826	43507	Dm.8032	NM_079826		ATPsyngamma	ATPG|ATPG_DROME|ATPsyn-gam|ATPsyn-gamma|CG7610|Dmel\CG7610	ATP synthase, gamma subunit	protein-coding
13345	chr4	44211	45710	+	0	NA	non-coding (NR_123742, exon 1 of 2)	non-coding (NR_123742, exon 1 of 2)	186	NR_123742	19835163		NR_123742		CR44440	Dmel\CR44440|lincRNA.918	ncRNA	ncRNA
6291	chr3L	1375651	1375920	+	0	NA	intron (NM_080051, intron 1 of 3)	intron (NM_080051, intron 1 of 3)	5157	NM_080051	44856	Dm.1452	NM_080051		ru	CG1214|Dmel\CG1214|Rho-3|Rho-related [62A1]|Rho3|rho-3|rho3	roughoid	protein-coding
9878	chr3R	5581901	5582520	+	0	NA	exon (NM_141297, exon 3 of 7)	exon (NM_141297, exon 3 of 7)	6170	NM_141297	40676	Dm.17174	NM_141297		CG2926	Dmel\CG2926	CG2926	protein-coding
15652	chrX	16104661	16105090	+	0	NA	promoter-TSS (NM_001144730)	promoter-TSS (NM_001144730)	71	NM_167485	32576	Dm.11619	NM_132878		CG42353	CG9216|Dmel\CG42353|Dmel_CG9216	uncharacterized protein	protein-coding
14298	chrX	5081681	5082260	+	0	NA	5' UTR (NM_001169204, exon 2 of 5)	5' UTR (NM_001169204, exon 2 of 5)	1055	NM_131975	31430	Dm.6248	NM_131975		CG32767	BcDNA:GM08530|CG5086|CG5113|Dmel\CG32767|LD34931|i7	uncharacterized protein	protein-coding
1629	chr2L	12159441	12160330	+	0	NA	intron (NM_164996, intron 4 of 13)	intron (NM_164996, intron 4 of 13)	-1882	NM_164997	318988	Dm.13813	NM_164997		CG31861	CG17215|Dmel\CG31861	uncharacterized protein	protein-coding
3510	chr2R	6976191	6977030	+	0	NA	exon (NM_206045, exon 4 of 4)	exon (NM_206045, exon 4 of 4)	-1477	NM_165499	246489	Dm.34129	NM_165499		CG30157	Dmel\CG30157	uncharacterized protein	protein-coding
12061	chr3R	21618071	21620080	+	0	NA	promoter-TSS (NM_079712)	promoter-TSS (NM_079712)	-39	NM_079712	42549	Dm.1271	NM_079712		InR	18402|CG18402|DIHR|DILR|DIR|DIRH|DIRbeta|DInR|DInr|Dir-a|Dir-b|Dmel\CG18402|INR|INS|IR|Inr|Inr-alpha|Inr-beta|InsR|dINR|dIR|dIRH|dInR|dInr|dInsR|dinr|dir|er10|inR|inr|insulin/insulin-like growth factor receptor|l(3)05545|l(3)93Dj|l(3)er10|lnR|sprout	Insulin-like receptor	protein-coding
6772	chr3L	5358941	5361270	+	0	NA	promoter-TSS (NM_139701)	promoter-TSS (NM_139701)	-106	NM_139701	38612	Dm.7320	NM_139701		Cyt-c1	CG4769|CY1|Dmel\CG4769|anon-EST:Posey141	Cytochrome c1	protein-coding
981	chr2L	7222931	7223250	+	0	NA	promoter-TSS (NM_135261)	promoter-TSS (NM_135261)	-9	NM_135261	34004	Dm.18257	NM_135261		ico	B|CG4567|Dmel\CG4567|G|GFM1|dEF-G1|l(2)27Cb|l(2)27Ea	iconoclast	protein-coding
2973	chr2R	24911	25170	+	0	NA	Intergenic	G5_DM|LINE|Jockey	-301728	NM_001347775	26067049	Dm.30444	NM_001347775		CG45781	40378|CG40378|CG42644|CG43676|Dmel\CG45781|Dmel_CG40378|Dmel_CG42644|Dmel_CG43676	uncharacterized protein	protein-coding
333	chr2L	2457631	2458830	+	0	NA	exon (NM_164488, exon 3 of 3)	exon (NM_164488, exon 3 of 3)	3493	NM_164488	33432	Dm.4767	NM_057963		dpp	BMP|CG9885|DPP|DPP-C|Dm-DPP|Dmel\CG9885|Dpp|Hin-d|M(2)23AB|M(2)LS1|TGF-b|TGF-beta|TGF-betagr;/SMAD|TGFbeta|Tg|blk|ho|l(2)10638|l(2)22Fa|l(2)k17036|shv	decapentaplegic	protein-coding
5203	chr2R	18673211	18674160	+	0	NA	promoter-TSS (NM_079062)	promoter-TSS (NM_079062)	-149	NM_079062	37149	Dm.689	NM_079062		edl	CG15085|Dmel\CG15085|EDL|Edl|MAE|Mae|anon-WO02077276.2|anon-WO02077276.3|edl/mae|l(2)k06602|mae	ETS-domain lacking	protein-coding
8580	chr3L	19158041	19158880	+	0	NA	intron (NM_001275107, intron 5 of 5)	intron (NM_001275107, intron 5 of 5)	-11700	NM_079431	40090	Dm.2524	NM_079431		fz2	CG9739|D-Fz2|D-fz2|DFZ2|DFz-2|DFz2|Dfrz2|Dfz2|Dfz[[2]]|Dm Fz2|Dmel\CG9739|FZ2|Fz2|dFz2|dfz(2)|dfz2|dfz2r|frz2|fz-2	frizzled 2	protein-coding
3560	chr2R	7409741	7410350	+	0	NA	promoter-TSS (NM_001103739)	promoter-TSS (NM_001103739)	-660	NM_001273838	35661	Dm.36261	NM_001103739		CG1701	Dmel\CG1701	CG1701	protein-coding
12515	chr3R	25078531	25079090	+	0	NA	Intergenic	Intergenic	-3874	NM_001300587	43010	Dm.27400	NM_079771		fd96Ca	CG11921|Dmel\CG11921|Dmfd4|FD4|fd4	forkhead domain 96Ca	protein-coding
13664	chrX	529751	530390	+	0	NA	promoter-TSS (NM_001038728)	promoter-TSS (NM_001038728)	-221	NM_001272170	31001	Dm.3394	NM_130491		CG4293	154711_at|Dmel\CG4293|EG:65F1.1	CG4293	protein-coding
5022	chr2R	17514121	17514620	+	0	NA	TTS (NM_206152)	TTS (NM_206152)	153	NM_166238	36974	Dm.6912	NM_137378		CG4853	Dmel\CG4853	CG4853	protein-coding
7840	chr3L	14118691	14119270	+	0	NA	intron (NM_001274900, intron 3 of 6)	intron (NM_001274900, intron 3 of 6)	-10862	NM_140437	39567	Dm.24001	NM_140437		Sox21a	CG7345|Dmel\CG7345|SOXB2.3|Sox B2-3|Sox21|SoxB2.3	Sox21a	protein-coding
11066	chr3R	14356741	14357250	+	0	NA	intron (NM_001260174, intron 2 of 5)	intron (NM_001260174, intron 2 of 5)	4791	NM_169581	318680	Dm.33629	NM_169581		HEATR2	CG31320|Dmel\CG31320|NEST:bs27f03	HEAT repeat containing 2	protein-coding
2018	chr2L	15485321	15487160	+	0	NA	promoter-TSS (NR_124285)	promoter-TSS (NR_124285)	-289	NR_124285	19835054		NR_124285		CR45293	Dmel\CR45293	ncRNA	ncRNA
12865	chr3R	28583221	28583670	+	0	NA	exon (NM_001170291, exon 1 of 1)	exon (NM_001170291, exon 1 of 1)	1667	NM_079818	43383	Dm.22561	NM_079818		fkh	CG10002|Dmel\CG10002|Dmfkh|FKH|Fkh|Sebp2|dFoxA	fork head	protein-coding
8504	chr3L	18439611	18440410	+	0	NA	promoter-TSS (NM_079415)	promoter-TSS (NM_079415)	-68	NM_079415	40016	Dm.20106	NM_079415		skl	BcDNA:RE14076|CG13701|Dmel\CG13701|Skl|meph|veto	sickle	protein-coding
13131	chr3R	30458421	30459390	+	0	NA	promoter-TSS (NM_170488)	promoter-TSS (NM_170488)	395	NM_001276179	43617	Dm.5535	NM_143539		CG2224	Amsh|Dmel\CG2224|Q9VA71	CG2224	protein-coding
2447	chr2L	19322441	19324310	+	0	NA	non-coding (NR_124380, exon 1 of 1)	non-coding (NR_124380, exon 1 of 1)	437	NR_124380	19835140		NR_124380		CR45700	Dmel\CR45700	ncRNA	ncRNA
3085	chr2R	2586781	2587370	+	0	NA	Intergenic	PROTOP_A|DNA|P	-21690	NM_001015095	3354861	Dm.28163	NM_001015095		MFS17	BEST:LD07241|CG40263|Dmel\CG40263|bs24e02.y1	Major Facilitator Superfamily Transporter 17	protein-coding
15177	chrX	11891801	11892240	+	0	NA	promoter-TSS (NM_132537)	promoter-TSS (NM_132537)	13	NM_132537	32151	Dm.10761	NM_132537		sicily	CG15738|Dmel\CG15738|XE07	severe impairment of CI with lengthened youth	protein-coding
9097	chr3L	23023431	23023800	+	0	NA	intron (NM_001259962, intron 21 of 23)	DNAREP1_DM|RC|Helitron	25243	NM_001043156	40515	Dm.2496	NM_079494		nrm	CG32458|CG41452|CG43079|CG8779|CT16082|Dmel\CG43079|Dmel_CG32458|Dmel_CG41452|Dmel_CG8779	neuromusculin	protein-coding
10214	chr3R	8122141	8122810	+	0	NA	promoter-TSS (NM_141510)	promoter-TSS (NM_141510)	-250	NM_141510	40959	Dm.1098	NM_141510		CG7878	DmRH26|Dmel\CG7878|cg7878	CG7878	protein-coding
9279	chr3L	25733501	25733870	+	0	NA	Intergenic	S_DM|DNA|TcMar-Tc1	25508	NR_125320	19835742		NR_125320		CR45180	Dmel\CR45180	ncRNA	ncRNA
4938	chr2R	16730211	16731720	+	0	NA	5' UTR (NM_001103872, exon 1 of 11)	5' UTR (NM_001103872, exon 1 of 11)	419	NM_166189	246627	Dm.24533	NM_166188		CG30463	CG15713|CG8456|CG8463|Dmel\CG30463|dppGalNAcT9	uncharacterized protein	protein-coding
10496	chr3R	9745301	9746100	+	0	NA	TTS (NM_141679)	TTS (NM_141679)	667	NM_001104258	5740854	Dm.34407	NM_001104258		CG34409	CG12949|CG31411|CG31412|Dmel\CG34409|Dmel_CG31411|Dmel_CG31412|SP12|c-SP12	uncharacterized protein	protein-coding
13168	chr3R	30780181	30780970	+	0	NA	TTS (NR_125303)	TTS (NR_125303)	-2683	NM_170523	43650	Dm.4708	NM_057502		zfh1	CG1322|Dmel\CG1322|ZFH-1|ZFH1|Zfh-1|Zfh1|Zfh1a|l(3)00865|zfh-1|zfl-1|zhf1	Zn finger homeodomain 1	protein-coding
476	chr2L	3772901	3773180	+	0	NA	intron (NM_001258932, intron 2 of 3)	CpG	1014	NM_164558	33602	Dm.4025	NM_057535		bowl	17-29-5|BOWL|Bowl|CG10021|Dmel\CG10021|Su(tor)2-1|l(2)c|org2	brother of odd with entrails limited	protein-coding
10735	chr3R	11628441	11628910	+	0	NA	promoter-TSS (NM_141839)	promoter-TSS (NM_141839)	-84	NM_141839	41397	Dm.20766	NM_141839		CG14712	Dmel\CG14712	uncharacterized protein	protein-coding
15274	chrX	12730161	12730460	+	0	NA	intron (NR_073653, intron 1 of 1)	intron (NR_073653, intron 1 of 1)	643	NR_073653	14462398		NR_073653		CR43963	Dmel\CR43963	ncRNA	ncRNA
11147	chr3R	15075741	15076030	+	0	NA	intron (NM_001300403, intron 2 of 7)	intron (NM_001300403, intron 2 of 7)	1321	NM_001300403	2768670	Dm.20911	NM_206493		dpr9	BcDNA:GH01517|CG12601|CG14862|CG14863|CG31114|CG33485|CT34680|Dmel\CG33485|Dpr-9|Dpr9	defective proboscis extension response 9	protein-coding
12449	chr3R	24577231	24577970	+	0	NA	promoter-TSS (NM_001043288)	promoter-TSS (NM_001043288)	-147	NM_170150	42930	Dm.1319	NM_143014		REPTOR	CG13624|DM23|DM24|Dmel\CG13624|anon-WO0153538.65	Repressed by TOR	protein-coding
7271	chr3L	9802081	9802810	+	0	NA	promoter-TSS (NM_140103)	promoter-TSS (NM_140103)	-325	NM_140103	39151	Dm.27102	NM_140103		Ilp3	CG14167|DILP|DILP-3|DILP3|Dilp|Dilp 3|Dilp-3|Dilp3|Dmel\CG14167|Ilp|Ilp-3|dILP-3|dILP3|dIlp3|dilp|dilp-3|dilp3|ilp3	Insulin-like peptide 3	protein-coding
2198	chr2L	17199201	17200640	+	0	NA	intron (NM_135986, intron 2 of 6)	HOBO|DNA|hAT-hobo	17982	NM_165208	170887	Dm.26379	NM_165208		CG31750	Dmel\CG31750|Gr36d	uncharacterized protein	protein-coding
15973	chrX	18370561	18371780	+	0	NA	promoter-TSS (NM_206783)	promoter-TSS (NM_206783)	-91	NM_206781	32817	Dm.26256	NM_206781		CrebB	CG6103|CRE-BP|CREB|CREB-B|CREB-b|CREB2|CREB2a|CREB2b|Creb|Creb B 17A|Creb17A|Creb2|Creb2-b|Creb2.b|Creb2b|CrebB-17A|CrebB-17B|CrebB17-A|DM9|Dmel\CG6103|S162|dCREB|dCREB-2|dCREB-2a|dCREB-B|dCREB2|dCREB2-a|dCREB2-b|dCREB2a|dCREB2b|dCbz|dCreb2|dCreb2-b|dCrebB2|dcreb2-b|l(1)17Af	Cyclic-AMP response element binding protein B	protein-coding
14446	chrX	6330551	6331380	+	0	NA	5' UTR (NM_001144692, exon 1 of 1)	5' UTR (NM_001144692, exon 1 of 1)	123	NM_001298013	7354471	Dm.7	NM_001144692		CG42240	CG15893|Dmel\CG42240	uncharacterized protein	protein-coding
10429	chr3R	9345881	9346150	+	0	NA	intron (NM_001300317, intron 2 of 5)	intron (NM_001300317, intron 2 of 5)	4148	NM_001300317	41114	Dm.21258	NM_001031990		CG45050	BcDNA:RE70963|CG16750|CG16751|CG30492|CG33187|CG33188|CG3393|CG33936|CG33937|CG43674|Dmel\CG45050|Dmel_CG33937|Dmel_CG43674|anon-85Da|anon-EST:fe1B11|anon-EST:fe2G11|drn	uncharacterized protein	protein-coding
7179	chr3L	9020451	9021450	+	0	NA	Intergenic	Intergenic	-1704	NM_140025	39038	Dm.5197	NM_140025		Doc2	CG5187|Dm-DOC2|Dmel\CG5187|Doc|doc2	Dorsocross2	protein-coding
4004	chr2R	10437751	10438740	+	0	NA	promoter-TSS (NM_001273939)	promoter-TSS (NM_001273939)	-3	NM_176125	36104	Dm.12982	NM_078960		Galphao	Bkh|CG2204|DG[[o]]|DGalpha0|DGalpha[[o]]|DROGPAD|Dmel\CG2204|G(o)alpha47A|G-alpha-47A|G-oalpha|G-oalpha47A|G-oalpha47a|G[[o]]|G[[o]]alpha|G[[oalpha]]|Galpha47A|Galpha[[047A]]|Galpha[[0]]|Galpha[[o]]|Galpha[[o]]47A|Galphai/o|Galphao47A|Go|Go-alpha|Goa|Goalpha|Goalpha47a|alpha(o)|bkh|dgo|dgoalpha|drogpad|goalpha|like GNAO	G protein alpha o subunit	protein-coding
3325	chr2R	5701671	5702330	+	0	NA	promoter-TSS (NM_001169586)	promoter-TSS (NM_001169586)	-112	NM_001169585	46078	Dm.1631	NM_080129		vlc	CG8390|Dmel\CG8390|X|anon-41Fa|anon-WO0118547.98|l(2)07022	vulcan	protein-coding
6922	chr3L	6784581	6785040	+	0	NA	Intergenic	Intergenic	2295	NR_124821	19834999		NR_124821		CR45759	Dmel\CR45759|lincRNA.458	ncRNA	ncRNA
6681	chr3L	4283601	4284130	+	0	NA	promoter-TSS (NM_139630)	promoter-TSS (NM_139630)	14	NM_139630	38526	Dm.14909	NM_139630		CG1316	Dmel\CG1316|cg1316	CG1316	protein-coding
2316	chr2L	18590811	18591320	+	0	NA	promoter-TSS (NM_001299116)	promoter-TSS (NM_001299116)	174	NM_001299117	35109		NM_136042		CG15160	Dmel\CG15160	uncharacterized protein	protein-coding
14049	chrX	3150411	3150950	+	0	NA	intron (NM_001258581, intron 2 of 8)	intron (NM_001258581, intron 2 of 8)	15810	NM_001258581	31293		NM_057511		N	1.1|16-178|16-55|Ax|CG3936|CT13012|Chp|Co|Dmel\CG3936|EG:140G11.1|EG:163A10.2|NECD|NICD|RICN|anon-EST:Liang-1.12|clone 1.12|co|dNotch|fa|l(1)3Cb|l(1)Ax|l(1)N|n[fah]|nd|notch|shd|spl|swb	Notch	protein-coding
6495	chr3L	3045731	3046030	+	0	NA	exon (NM_139504, exon 2 of 4)	exon (NM_139504, exon 2 of 4)	932	NM_139504	38362	Dm.7013	NM_139504		scramb2	CG1893|Dmel\CG1893|Scramb2	scramblase 2	protein-coding
11770	chr3R	19505791	19506770	+	0	NA	exon (NM_001043263, exon 17 of 34)	exon (NM_001043263, exon 17 of 34)	2489	NM_001043256	42327	Dm.16710	NM_001043256		Dys	CG17750|CG31175|CG34157|CG7240|CG7243|CG7344|DLP|DLP1|DLP186|DLP2|DLP3|DmDLP|DmDYS|Dmel\CG34157|Dp117|Dp186|Dp205|GI3046716|IDLP|det|dmDLP|dmDp186|dmDys|dys	Dystrophin	protein-coding
15982	chrX	18499291	18500160	+	0	NA	promoter-TSS (NM_133074)	promoter-TSS (NM_133074)	147	NM_167623	32836	Dm.7692	NM_133073		GalNAc-T2	CG6394|Dmel\CG6394|PGANT7|anon-WO02059370.15|dGalNAc-T2|pgant7	UDP-N-acetyl-alpha-D-galactosamine:polypeptide N-acetylgalactosaminyltransferase 2	protein-coding
15933	chrX	18014591	18014870	+	0	NA	promoter-TSS (NM_001169317)	promoter-TSS (NM_001169317)	-225	NM_001169317	32780	Dm.7088	NM_078669		Sh	BcDNA:GH03046|CG12348|CG17860|CG7640|Dmel\CG12348|EKO|Eko|F-c|K[[v]]1|Kv1|SH|Sha|Shw|V-I|minisleep|sh|sha	Shaker	protein-coding
8762	chr3L	20555471	20555730	+	0	NA	Intergenic	Intergenic	-15183	NM_140987	40283	Dm.5464	NM_140987		Rcd2	CG4786|CT15369|Dmel\CG4786	Reduction in Cnn dots 2	protein-coding
2372	chr2L	18917131	18917550	+	0	NA	exon (NM_136073, exon 10 of 11)	exon (NM_136073, exon 10 of 11)	11216	NR_124373	19834994		NR_124373		CR44738	Dmel\CR44738|lincRNA.191	ncRNA	ncRNA
9832	chr3R	5294171	5294750	+	0	NA	exon (NM_001031978, exon 6 of 14)	exon (NM_001031978, exon 6 of 14)	3056	NM_001275350	45467	Dm.24822	NM_143760		mtd	CG10196|CG10199|CG32464|Dmel\CG32464|L(3)82Fd|L82|anon-EST:Posey263|l(3)82FD|l(3)82Fd	mustard	protein-coding
5794	chr2R	23310051	23310320	+	0	NA	promoter-TSS (NM_137932)	promoter-TSS (NM_137932)	-369	NM_137932	37690	Dm.5579	NM_137932		Prosbeta5R1	CG9868|Dmel\CG9868|Prosbeta5R|beta5R1	Proteasome beta5 subunit-related 1	protein-coding
1998	chr2L	15343741	15344030	+	0	NA	Intergenic	Intergenic	10019	NM_057252	34903	Dm.4764	NM_057252		esg	4B7|BG:DS07851.7|CG3758|Dmel\CG3758|Esg|br43|dgl|flg|l(2)07082|l(2)35Ce|l(2)4B7|l(2)br43|l(2)esg|l35Ce|shof|wiz	escargot	protein-coding
5554	chr2R	21501511	21503000	+	0	NA	promoter-TSS (NM_137741)	promoter-TSS (NM_137741)	158	NM_206194	37451	Dm.20433	NM_079080		MESK2	BcDNA:GH12032|BcDNA:LD27504|BcDNA:RH10174|CG15668|CG15669|Dmel\CG15669|Mesk2|l(2)01467|mesk2	Misexpression suppressor of KSR 2	protein-coding
14053	chrX	3161971	3163340	+	0	NA	intron (NM_001258581, intron 5 of 8)	intron (NM_001258581, intron 5 of 8)	10485	NM_144464	59253	Dm.5987	NM_144464		CG18508	CG4015|Dmel\CG18508|EG:140G11.3	uncharacterized protein	protein-coding
11594	chr3R	18075271	18075610	+	0	NA	Intergenic	(GAGAATC)n|Simple_repeat|Simple_repeat	-5608	NM_142418	42161	Dm.16746	NM_142418		CG14317	Dmel\CG14317|anon-WO0172774.95	uncharacterized protein	protein-coding
3600	chr2R	7594161	7594590	+	0	NA	TTS (NM_001201944)	TTS (NM_001201944)	4173	NM_165544	35696	Dm.508	NM_165543		scra	ABP8|Abp8|Ani|Anil|Anillin|CG2092|Dmel\CG2092|Scra|ani|anil|anillin|l(2)03427|l(2)43Ec|l(2)k08255	scraps	protein-coding
11742	chr3R	19324241	19324540	+	0	NA	intron (NM_001260264, intron 1 of 5)	intron (NM_001260264, intron 1 of 5)	1827	NM_057916	42313	Dm.7687	NM_057916		Dl	0495/20|0926/11|1053/14|1119/09|1304/03|1423/11|1440/11|1485/04|C1|CG3619|CT12133|D|DL|Dmel\CG3619|E(ls)2|EC3-5|anon-WO0118547.269|delta|delta D1|dmDelta|l(3)05151|l(3)92Ab|l(3)j8C3	Delta	protein-coding
1430	chr2L	10541641	10541930	+	0	NA	Intergenic	Intergenic	1737	NR_124178	19834771		NR_124178		CR44618	Dmel\CR44618|lincRNA.98	ncRNA	ncRNA
12454	chr3R	24586511	24586960	+	0	NA	intron (NM_001260360, intron 1 of 6)	intron (NM_001260360, intron 1 of 6)	1082	NM_001260360	2768685	Dm.31276	NM_143016		mld	CG13620|CG31312|CG33343|CG34100|CG9469|DTS-3|Dmel\CG34100|L(3)3[DTS]|Mld|l(3)3[DTS]|l(3)DTS3	molting defective	protein-coding
13151	chr3R	30732021	30732300	+	0	NA	promoter-TSS (NM_143564)	promoter-TSS (NM_143564)	-995	NM_143564	43646	Dm.25067	NM_143564		CG11313	Dmel\CG11313|SP11|c-SP11	uncharacterized protein	protein-coding
4951	chr2R	16855341	16855600	+	0	NA	promoter-TSS (NM_001274105)	promoter-TSS (NM_001274105)	-6	NM_079041	36887	Dm.23253	NM_079041		Fen1	CG8648|DmFEN-1|Dmel\CG8648|EG:EG0003.3|FEN1|fen1	Flap endonuclease 1	protein-coding
10301	chr3R	8652501	8653290	+	0	NA	promoter-TSS (NM_141552)	promoter-TSS (NM_141552)	21	NM_134311	41022	Dm.7901	NM_057876		Dhod	CG9741|DHOD|DHODH|Dmel\CG9741|dhod|l(3)s3512	Dihydroorotate dehydrogenase	protein-coding
9298	chr3L	26010781	26011060	+	0	NA	intron (NM_001276235, intron 1 of 12)	intron (NM_001276235, intron 1 of 12)	2801	NM_001015188	3354941	Dm.29299	NM_001015187		CG40178	CG40178/CG41283|Dmel\CG40178	uncharacterized protein	protein-coding
318	chr2L	2374221	2374570	+	0	NA	promoter-TSS (NM_001201755)	promoter-TSS (NM_001201755)	232	NM_134831	33421	Dm.18398	NM_134831		CG3609	CT12127|Dmel\CG3609	CG3609	protein-coding
5212	chr2R	18796381	18797060	+	0	NA	promoter-TSS (NM_166308)	promoter-TSS (NM_166308)	-42	NM_137531	37168		NM_137531		MFS15	CG15094|Dmel\CG15094	Major Facilitator Superfamily Transporter 15	protein-coding
15471	chrX	14825481	14825730	+	0	NA	intron (NM_001258743, intron 1 of 16)	intron (NM_001258743, intron 1 of 16)	300	NM_001272622	32406		NM_078601		rut	AC|Ac12F|CG9533|Dmel\CG9533|EP1603|RUT|Rut|Rut-AC	rutabaga	protein-coding
395	chr2L	3036621	3036880	+	0	NA	promoter-TSS (NM_001273054)	promoter-TSS (NM_001273054)	-480	NM_001298646	33519	Dm.286	NM_134900		CG17260	Dmel\CG17260	uncharacterized protein	protein-coding
16177	chrX	19753481	19754460	+	0	NA	promoter-TSS (NM_001272804)	promoter-TSS (NM_001272804)	-901	NM_001272804	32992	Dm.7943	NM_134510		Pmp70	CG12703|Dmel\CG12703|PMP70|i17	Peroxisomal Membrane Protein 70 kDa	protein-coding
9704	chr3R	4613401	4614470	+	0	NA	intron (NM_079499, intron 1 of 6)	intron (NM_079499, intron 1 of 6)	1065	NM_169011	40575	Dm.9854	NM_079499		5-HT2A	5-HT2|5-HT2Dro|5-HT[2]Dro|5-HT[[2Dro]]|5-HT[[2]]|5-HT[[2]]Dro|5-ht2Dro|5HT-R82A|5HT-dro[[1]]|5HT2|5HT2-Dro|5HT2Dro|5HT[[2Dro]]|CG1056|Dm5HT2|Dmel\CG1056|d5-HT2|d5-HT2A|l(3)82CDb	5-hydroxytryptamine (serotonin) receptor 2A	protein-coding
6682	chr3L	4286741	4287170	+	0	NA	promoter-TSS (NM_001169875)	promoter-TSS (NM_001169875)	-83	NM_079199	38527	Dm.2665	NM_079199		TfIIEbeta	CG1276|Dmel\CG1276|E[[S]]|TFIIE|TFIIEbeta|TFIIbeta|TfIIE|dTFIIE-S|dTFIIES	Transcription factor IIEbeta	protein-coding
2404	chr2L	19053701	19054840	+	0	NA	TTS (NM_001273628)	TTS (NM_001273628)	192	NM_136093	35177	Dm.7370	NM_136093		CG10492	B1|Dmel\CG10492|TU37B1|TuB1|anon-37B-1	uncharacterized protein	protein-coding
3619	chr2R	7793371	7793700	+	0	NA	promoter-TSS (NM_001038847)	promoter-TSS (NM_001038847)	-90	NM_080142	47186		NM_080142		mus205	154926_at|AAF59191|CG1925|DhRev3|DmREV3|Dmel\CG1925|Dmpolzeta|Mus205|mus 205|mus(2)205|mus-205|rev3	mutagen-sensitive 205	protein-coding
15676	chrX	16235991	16236820	+	0	NA	Intergenic	Intergenic	17712	NR_002129	3771949	Dm.32255	NR_002129		snRNA:U5:14B	14B U5|CR32914|Dmel\CR32914|K2|U5|U5 snRNA|U5 snRNA 14B|U5-14B|U5:14B|U5snRNA|U5snRNA14B|U5var:14B|dU5|snRNA3|snRNA4|snRNA:U5|snRNA[[3]]	small nuclear RNA U5 at 14B	ncRNA
7701	chr3L	13053701	13054470	+	0	NA	Intergenic	Intergenic	7074	NM_140371	39486	Dm.18896	NM_140371		CG11279	BcDNA:GM21080|Dmel\CG11279	uncharacterized protein	protein-coding
14603	chrX	7333711	7334360	+	0	NA	intron (NM_167124, intron 2 of 6)	intron (NM_167124, intron 2 of 6)	-1844	NM_001201625	10178796		NM_001201625		CG42780	Dmel\CG42780	uncharacterized protein	protein-coding
4030	chr2R	10524571	10524960	+	0	NA	TTS (NM_176138)	TTS (NM_176138)	9589	NM_170619	44548	Dm.11710	NM_080027		lola	BEST:LD03274|BTB-IV|BcDNA:LD17006|BcDNA:RH31485|BtbIV|CG12052|CG18376|CG18378|CG18379|CG18380|CG18381|CG30012|CG30013|CG30014|Dmel\CG12052|LD03274|Lola|NEST:bs06a08|bs06a08.y1|btb|eyeful|fus7|l(2)00642|l(2)s3697|sw59	longitudinals lacking	protein-coding
2622	chr2L	20682041	20682910	+	0	NA	promoter-TSS (NM_165338)	promoter-TSS (NM_165338)	107	NM_136206	35331	Dm.19855	NM_136206		CG2617	38E.2|Dmel\CG2617	CG2617	protein-coding
4011	chr2R	10476471	10477050	+	0	NA	intron (NM_078961, intron 1 of 8)	CpG	-1279	NM_001169641	36109	Dm.6501	NM_078961		whd	BEST:GH27794|CG12891|CPT1|CPTI|Cpt1|Dmel\CG12891|dCPT1|gh27794	withered	protein-coding
13571	chr4	1106531	1106790	+	0	NA	intron (NM_079894, intron 7 of 12)	intron (NM_079894, intron 7 of 12)	8135	NM_001169363	43825	Dm.1886	NM_079894		sv	CG11049|Cat|D-Pax2|D-pax-2|D-pax2|DPax-2|DPax2|Dmel\CG11049|Dpax-2|Dpax2|PAX2|Pax2|Pax2/5/8|Pax258|Sv|d-Pax2|dPax2|dPax258|en(lz)4G/I|l(4)40|pax2/sparkling|pol|shaven/sparkling|spa|spa-sv	shaven	protein-coding
6821	chr3L	5851371	5851760	+	0	NA	Intergenic	Intergenic	-5901	NM_079218	38657	Dm.2441	NM_079218		vn	CG10491|CT29452|Dm vn|Dmel\CG10491|P1749|Vein|Vn|ddd|l(3)10567|l(3)10568|l(3)L6A|l(3)ddd|l(3)rF264|l(3)vn10567|wvn	vein	protein-coding
4569	chr2R	13983021	13983670	+	0	NA	promoter-TSS (NM_001274031)	promoter-TSS (NM_001274031)	-28	NM_137077	36551	Dm.611	NM_137077		Ctf4	CG13350|Dmel\CG13350|anon-WO0140519.180	Chromosome transmission fidelity 4	protein-coding
1767	chr2L	13398621	13399190	+	0	NA	promoter-TSS (NM_135808)	promoter-TSS (NM_135808)	-86	NM_135808	34757		NM_135808		CG7110	Dmel\CG7110	CG7110	protein-coding
681	chr2L	5258531	5259260	+	0	NA	promoter-TSS (NR_124080)	promoter-TSS (NR_124080)	-47	NR_124079	19835493		NR_124079		CR44744	Dmel\CR44744	ncRNA	ncRNA
5270	chr2R	19414111	19414370	+	0	NA	TTS (NR_048146)	TTS (NR_048146)	250	NR_048146	12798346		NR_048146		snoRNA:hts-a	CR43579|Dmel\CR43579|snoHACA_05	ncRNA	ncRNA
5343	chr2R	19941571	19941970	+	0	NA	Intergenic	Intergenic	-1226	NR_048168	12798123		NR_048168		CR43421	Dmel\CR43421	ncRNA	ncRNA
741	chr2L	5657541	5657820	+	0	NA	intron (NM_164653, intron 1 of 12)	intron (NM_164653, intron 1 of 12)	880	NM_164653	33795		NM_164653		DIP-theta	31646|CG14008|CG14009|CG31646|CT33566|Dmel\CG31646	Dpr-interacting protein theta	protein-coding
2917	chr2L	22673151	22673520	+	0	NA	intron (NM_001042936, intron 7 of 9)	TV1I|LTR|Gypsy	78460	NR_073823	14462816		NR_073823		CR43927	Dmel\CR43927	ncRNA	ncRNA
9909	chr3R	5758651	5759220	+	0	NA	promoter-TSS (NM_169098)	promoter-TSS (NM_169098)	62	NM_169098	40712	Dm.11594	NM_169098		Sec8	CG2095|Dmel\CG2095|Sec8p|dsec8|fun|sec8	Secretory 8	protein-coding
12733	chr3R	27205051	27205340	+	0	NA	Intergenic	Intergenic	-10928	NM_001300629	43275		NM_079803		Ser	Bd|CG6127|CT18858|Dmel\CG6127|Rpw|SER|mel(3)8|ser|std	Serrate	protein-coding
1293	chr2L	9677841	9678720	+	0	NA	Intergenic	Intergenic	-7210	NR_073749	14462733		NR_073749		CR44150	Dmel\CR44150|lincRNA.94	ncRNA	ncRNA
460	chr2L	3613421	3615700	+	0	NA	Intergenic	Intergenic	-1736	NR_124055	19834825		NR_124055		CR44310	Dmel\CR44310	ncRNA	ncRNA
347	chr2L	2748381	2748980	+	0	NA	promoter-TSS (NM_057328)	promoter-TSS (NM_057328)	-193	NM_057328	33461	Dm.6415	NM_057328		Pgk	169C9S|CG3127|Dmel\CG3127|ESTS:169C9S|PGK|anon-sts18|l(2)23AB3|l(2)23Ac|pgk|pgk1	Phosphoglycerate kinase	protein-coding
2887	chr2L	22245561	22245830	+	0	NA	3' UTR (NM_001273759, exon 2 of 2)	3' UTR (NM_001273759, exon 2 of 2)	2138	NM_136300	35453	Dm.11743	NM_136300		RpL21	BcDNA:RH06526|CG12775|Dmel\CG12775|RPL21|Rp L21|anon-EST:Posey18|anon-EST:Posey30	Ribosomal protein L21	protein-coding
14086	chrX	3448051	3449300	+	0	NA	intron (NM_001272276, intron 1 of 6)	intron (NM_001272276, intron 1 of 6)	268	NM_001297909	31311	Dm.33932	NM_130699		CG12535	Dmel\CG12535	uncharacterized protein	protein-coding
1533	chr2L	11319391	11319670	+	0	NA	TTS (NR_124193)	TTS (NR_124193)	586	NR_124193	19835566		NR_124193		CR44583	Dmel\CR44583|lincRNA.105	ncRNA	ncRNA
1652	chr2L	12460601	12461680	+	0	NA	5' UTR (NM_165013, exon 1 of 2)	5' UTR (NM_165013, exon 1 of 2)	116	NM_165013	34665	Dm.7349	NM_080364		bun	1550|Bun|BunA|CG31857|CG42281|CG5461|Dm_2L:60722|Dmel\CG42281|Dmel_CG31857|Dmel_CG5461|EP(2)0488|TSC-22|Tsc22|bnc|l(2)00255|l(2)02687|l(2)05479|l(2)06475|l(2)k02903|l(2)rI043|shs	bunched	protein-coding
8654	chr3L	19687121	19687570	+	0	NA	promoter-TSS (NM_168807)	promoter-TSS (NM_168807)	8	NM_001275132	40147	Dm.15135	NM_140884		CG8765	Dmel\CG8765	CG8765	protein-coding
146	chr2L	821191	821810	+	0	NA	promoter-TSS (NM_001038778)	promoter-TSS (NM_001038778)	78	NM_001169376	33260	Dm.7253	NM_134705		CG3662	Dmel\CG3662	CG3662	protein-coding
12129	chr3R	22146881	22148230	+	0	NA	intron (NM_001260304, intron 2 of 19)	intron (NM_001260304, intron 2 of 19)	13720	NM_001275898	42601	Dm.13728	NM_169997		SKIP	CG13863|CG13864|CG31163|CG5736|CG7086|CG7087|Dmel\CG31163	Shal K[+] channel interacting protein	protein-coding
5563	chr2R	21549661	21550020	+	0	NA	intron (NM_057411, intron 1 of 4)	intron (NM_057411, intron 1 of 4)	3197	NM_057411	37455		NM_057410		Egfr	C-erb|CG10079|D-EGFR|D-Egf|DEGFR|DER|DER flb|DER/EGFR|DER/top|DER/torpedo|DER1|DEgfr|Degfr|Der|DmHD-33|Dmel\CG10079|EC2-4|EFG-R|EGF-R|EGFR|EGFr|EGfr|EK2-6|Egf|Egf-r|EgfR|El|Elp|Elp-1|Elp-B1|Elp-B1RB1|Flb|HD-33|TOP|Tor|Torpedo/DER|Torpedo/Egfr|c-erbB|d-egf-r|dEGFR|dEGFR1|dEGFr|dEgfr|degfr|der|egfr|flb|l(2)05351|l(2)09261|l(2)57DEFa|l(2)57EFa|l(2)57Ea|mor1|top|top/DER|top/flb|torpedo/Egfr|torpedo/e…	Epidermal growth factor receptor	protein-coding
14223	chrX	4553951	4554470	+	0	NA	promoter-TSS (NM_131943)	promoter-TSS (NM_131943)	-13	NM_131943	31388	Dm.3765	NM_131943		CG11444	Dmel\CG11444	uncharacterized protein	protein-coding
14620	chrX	7542631	7542880	+	0	NA	intron (NM_167128, intron 2 of 7)	intron (NM_167128, intron 2 of 7)	5237	NM_167128	318169		NM_167128		CG32719	Dmel\CG32719	uncharacterized protein	protein-coding
5118	chr2R	18192911	18193420	+	0	NA	promoter-TSS (NM_001038869)	promoter-TSS (NM_001038869)	-314	NM_001038869	37088	Dm.15936	NM_001038869		CG33958	CG14501|CG5719|Dmel\CG33958|GYC	uncharacterized protein	protein-coding
6709	chr3L	4595971	4596360	+	0	NA	exon (NM_001014564, exon 5 of 8)	exon (NM_001014564, exon 5 of 8)	16931	NM_001202122	48973	Dm.1531	NM_080195		Src64B	C-src1|CG7524|D-Src64B|D-src|DSRC64|DSrc|DSrc64|DSrc64B|Dm SRC1|DmHD-358|Dmel\CG7524|Dsrc|Dsrc64|Dsrc64B|HD-358|MRE5|SRC 64B|SRC64B|Src|Src1|Src64|Src64b|c-src|dSrc|dsrc|src|src1|src64|src64B|src64b	Src oncogene at 64B	protein-coding
16168	chrX	19703961	19704620	+	0	NA	promoter-TSS (NM_134504)	promoter-TSS (NM_134504)	-31	NM_001258837	32983	Dm.227	NM_134504		CG14232	Dmel\CG14232|anon-18DEc	uncharacterized protein	protein-coding
14613	chrX	7428301	7428670	+	0	NA	Intergenic	Intergenic	-2742	NM_167127	318175	Dm.20899	NM_167127		CG32726	BcDNA:RH59280|Dmel\CG32726	uncharacterized protein	protein-coding
16331	chrX	21052781	21053590	+	0	NA	promoter-TSS (NM_134582)	promoter-TSS (NM_134582)	752	NM_001272822	33082		NM_134581		CG1518	Dmel\CG1518|STT	CG1518	protein-coding
14077	chrX	3378511	3378800	+	0	NA	intron (NR_123782, intron 2 of 3)	CpG	5496	NM_080323	31310	Dm.4239	NM_080323		Myc	CG10798|D-Myc|DM|DMYc|Dm|Dmel\CG10798|Dmyc|EG:BACN5I9.1|MYC|anon-WO03040301.171|bHLHe57|c-MYC|c-Myc|c-myc|d-myc|dMYC|dMyc|dMyc1|da|dm|dm/dMyc|dm/myc|dmyc|dmyc1|l(1)G0139|l(1)G0354|l(1)G0359|myc	Myc	protein-coding
3407	chr2R	6267181	6267640	+	0	NA	Intergenic	Gypsy12_LTR|LTR|Gypsy	21898	NM_078903	35554	Dm.3155	NM_078903		Pld	CG12110|Dmel\CG12110|PLD|dPLD|dPld|pld|pld1	Phospholipase D	protein-coding
9049	chr3L	22642871	22643150	+	0	NA	promoter-TSS (NR_125046)	promoter-TSS (NR_125046)	-871	NR_125046	19835201		NR_125046		CR45381	Dmel\CR45381	ncRNA	ncRNA
4866	chr2R	16173641	16173900	+	0	NA	exon (NM_137249, exon 11 of 18)	exon (NM_137249, exon 11 of 18)	-2909	NM_137248	36789	Dm.9146	NM_137248		CG8435	Dmel\CG8435	CG8435	protein-coding
10807	chr3R	12259561	12261640	+	0	NA	promoter-TSS (NM_001275571)	promoter-TSS (NM_001275571)	-369	NM_001275571	14462454	Dm.38953	NM_001275571		CG44038	Dmel\CG44038	uncharacterized protein	protein-coding
2003	chr2L	15406611	15407280	+	0	NA	Intergenic	Intergenic	-6448	NR_124280	19835999		NR_124280		CR45374	Dmel\CR45374	ncRNA	ncRNA
3388	chr2R	6150951	6151700	+	0	NA	intron (NM_165461, intron 3 of 6)	intron (NM_165461, intron 3 of 6)	5804	NM_165463	35540	Dm.4159	NM_165461		EcR	CG1765|CG8347|DEcR|Dhr23|DmEcR|Dmel\CG1765|ECR|ECR-C|EcR-A|EcR-B|EcR-B1|EcR1b|EcRA|EcRB|EcRB-1|EcRB1|EcRC|EcdR|Ecr|Ecr1B|NR1H1|anon-WO0229075.1|dECR|dmEcR|ecr|lie|ms(2)06410|ms(2)42A|snt	Ecdysone receptor	protein-coding
5413	chr2R	20562011	20562550	+	0	NA	promoter-TSS (NM_080378)	promoter-TSS (NM_080378)	35	NR_124665	19835112		NR_124665		CR44653	Dmel\CR44653	ncRNA	ncRNA
15458	chrX	14626991	14627950	+	0	NA	intron (NM_001258738, intron 1 of 6)	intron (NM_001258738, intron 1 of 6)	-24890	NM_001298313	32397	Dm.17429	NM_132738		CG9413	Dmel\CG9413	CG9413	protein-coding
8685	chr3L	19973061	19973810	+	0	NA	exon (NM_079449, exon 13 of 20)	exon (NM_079449, exon 13 of 20)	6377	NM_001275154	40181	Dm.24020	NM_140906		CG14182	Dmel\CG14182	uncharacterized protein	protein-coding
10156	chr3R	7505721	7506060	+	0	NA	promoter-TSS (NM_169187)	promoter-TSS (NM_169187)	-792	NM_079534	40897		NM_079534		alpha-Est9	CG1128|Dm_3R:18691|DmalphaE9|Dmel\CG1128|Est9|J|aE9|alphaE9	alpha-Esterase-9	protein-coding
9716	chr3R	4674661	4674920	+	0	NA	TTS (NR_073981)	TTS (NR_073981)	813	NR_073981	14462433		NR_073981		CR44157	Dmel\CR44157	ncRNA	ncRNA
8859	chr3L	21343281	21344030	+	0	NA	promoter-TSS (NM_168898)	promoter-TSS (NM_168898)	61	NM_001275224	40361	Dm.20131	NM_141048		CG7324	Dmel\CG7324|Q9VP46	CG7324	protein-coding
6918	chr3L	6756121	6757100	+	0	NA	promoter-TSS (NM_139801)	promoter-TSS (NM_139801)	-113	NM_139801	38750	Dm.2131	NM_139801		CG10103	Dmel\CG10103	uncharacterized protein	protein-coding
8338	chr3L	17361711	17363580	+	0	NA	TTS (NM_079400)	TTS (NM_079400)	2963	NM_079400	39935	Dm.5399	NM_079400		tap	CG7659|Dmel\CG7659|TAP|Tap|bHLHc9|bps|l(3)01658	target of Poxn	protein-coding
9041	chr3L	22556201	22556960	+	0	NA	Intergenic	BLOOD_I-int|LTR|Gypsy	6354	NM_079492	40475	Dm.2498	NM_079492		Trxr-2	CG11401|Dm-TrxR|DmTrx|DmTrxR-2|Dmel\CG11401|TRR|TrxR|Trxr2|trxr-2	thioredoxin reductase 2	protein-coding
305	chr2L	2195161	2195590	+	0	NA	intron (NM_001272983, intron 1 of 2)	intron (NM_001272983, intron 1 of 2)	-2365	NM_001103584	5740746	Dm.33408	NM_001103584		CG34172	Dmel\CG34172	uncharacterized protein	protein-coding
470	chr2L	3685121	3685560	+	0	NA	intron (NM_001298663, intron 6 of 7)	intron (NM_001298663, intron 6 of 7)	7247	NM_134953	33589	Dm.20429	NM_134953		CG16704	BcDNA:RH31195|CT37177|Dmel\CG16704	uncharacterized protein	protein-coding
2864	chr2L	22110331	22110610	+	0	NA	TTS (NM_136288)	TTS (NM_136288)	1506	NM_136288	35439	Dm.17890	NM_136288		CG6675	Dmel\CG6675	CG6675	protein-coding
2584	chr2L	20310981	20311510	+	0	NA	promoter-TSS (NM_001169549)	promoter-TSS (NM_001169549)	26	NM_001259172	45931	Dm.3356	NM_080115		spir	38C.34|38C.37|CG10076|CG18621|Dmel\CG10076|NP2788|Spir|Spire|l(2)08327|p150-Spir|p150Spir	spire	protein-coding
15449	chrX	14557051	14557940	+	0	NA	Intergenic	NOMAD_I-int|LTR|Gypsy	-15498	NR_123905	19835969		NR_123905		CR45521	Dmel\CR45521	ncRNA	ncRNA
11606	chr3R	18167021	18167440	+	0	NA	promoter-TSS (NM_001170173)	promoter-TSS (NM_001170173)	43	NM_001170173	3772662	Dm.4424	NM_142423		CG7215	CG32920|Dmel\CG7215	CG7215	protein-coding
15019	chrX	10743621	10745850	+	0	NA	promoter-TSS (NM_167241)	promoter-TSS (NM_167241)	208	NM_132420	32005	Dm.11844	NM_132420		stx	CG32676|CG9725|CG9732|Dmel\CG32676	stuxnet	protein-coding
7059	chr3L	8140191	8140540	+	0	NA	intron (NM_139921, intron 4 of 6)	intron (NM_139921, intron 4 of 6)	2557	NM_139921	38905	Dm.15493	NM_139921		mus301	CG7972|Dmel\CG7972|Mus301|SpnC|anon-WO0118547.354|cg7972|mus(3)301|spn-C|spnC	mutagen-sensitive 301	protein-coding
1028	chr2L	7533941	7534610	+	0	NA	intron (NM_144299, intron 3 of 5)	intron (NM_144299, intron 3 of 5)	-3701	NM_001014478	34032	Dm.3069	NM_144299		RapGAP1	CG13789|CG13790|CG13791|CG33529|CG34374|CG44086|CG6682|Dmel\CG44086|Dmel_CG13790|Dmel_CG13791|Dmel_CG33529|Dmel_CG34374|FBpp0111515|Q9VM02_DROME|RapGap1|Rapgap1|rapgap1	Rap GTPase activating protein 1	protein-coding
6719	chr3L	4645281	4646120	+	0	NA	exon (NM_079917, exon 16 of 21)	exon (NM_079917, exon 16 of 21)	-2576	NM_168100	326203	Dm.31585	NM_168100		CG32238	CG7474|Dmel\CG32238	uncharacterized protein	protein-coding
13835	chrX	1785891	1786160	+	0	NA	3' UTR (NM_166903, exon 11 of 11)	3' UTR (NM_166903, exon 11 of 11)	2932	NR_047728	12798093		NR_047728		mir-981	CR42885|Dmel\CR42885|dme-mir-981|miR-981	mir-981 stem loop	ncRNA
13460	chr4	571421	572490	+	0	NA	promoter-TSS (NM_001272135)	promoter-TSS (NM_001272135)	200	NM_166770	43799	Dm.3341	NM_143670		Ephrin	CG1862|Dmel\CG1862|ephrin|lincRNA.922	ephrin	protein-coding
2375	chr2L	18924881	18925280	+	0	NA	intron (NM_001299140, intron 6 of 10)	intron (NM_001299140, intron 6 of 10)	18880	NM_136073	35149	Dm.11416	NM_136073		ssp3	CG10666|CG18397|Dmel\CG18397|Ssp3	short spindle 3	protein-coding
2768	chr2L	21527731	21529000	+	0	NA	promoter-TSS (NM_001032199).10	promoter-TSS (NM_001032199).10	24	NM_001032200	3772556		NM_001032200		His2A:CG33856	CG33856|Dmel\CG33856	histone H2A	protein-coding
6606	chr3L	3831671	3831930	+	0	NA	exon (NM_001104027, exon 3 of 13)	exon (NM_001104027, exon 3 of 13)	2803	NM_001104026	44543	Dm.1826	NM_080026		enc	BB129|CG10847|Dmel\CG10847|Enc|fs(3)63F-64A	encore	protein-coding
5982	chr2R	24796851	24797640	+	0	NA	promoter-TSS (NM_138125)	promoter-TSS (NM_138125)	169	NM_057972	37970	Dm.784	NM_057972		Orc4	CG2917|DmORC4|Dmel\CG2917|ORC|ORC4|dmOrc4|orc4|rDmORC	Origin recognition complex subunit 4	protein-coding
1521	chr2L	11258361	11258930	+	0	NA	exon (NM_001169481, exon 8 of 9)	exon (NM_001169481, exon 8 of 9)	10357	NM_080254	53561	Dm.12764	NM_080254		cmet	CENP-E|CENP-E meta|CENP-META|CENP-Meta|CENPE|CENPmeta|CG6392|Cenp-E|Cenp-M|Cenp-meta|Cenp_E|Cmet|DmCmet|DmCmeta|Dmel\CG6392|KIF 10|KIF10|l(2)04431	CENP-meta	protein-coding
4310	chr2R	12335041	12335380	+	0	NA	promoter-TSS (NM_001169654)	promoter-TSS (NM_001169654)	-106	NM_136918	36338	Dm.578	NM_136918		CG8490	Dmel\CG8490	CG8490	protein-coding
16173	chrX	19743781	19745080	+	0	NA	promoter-TSS (NM_001031908)	promoter-TSS (NM_001031908)	-1	NM_001031907	3772007	Dm.5455	NM_001031907		Rpp20	BcDNA:RE70209|CG12533|CG32530|CG32530-ORFA|CG33931|Dmel\CG33931|dRpp20	Rpp20	protein-coding
5854	chr2R	23734371	23734640	+	0	NA	promoter-TSS (NR_048194)	promoter-TSS (NR_048194)	-364	NR_048194	12797861	Dm.38691	NR_048194		mir-4979	CR43528|Dmel\CR43528|dme-mir-4979	mir-4979 stem loop	ncRNA
11853	chr3R	20337481	20338030	+	0	NA	Intergenic	Intergenic	-1218	NM_001104375	42415	Dm.27348	NM_001104375		Ir92a	CG15685|DmelIR92a|Dmel\CG15685|IR92a	Ionotropic receptor 92a	protein-coding
4761	chr2R	15528961	15529320	+	0	NA	intron (NM_001274070, intron 1 of 16)	intron (NM_001274070, intron 1 of 16)	3119	NM_135357	36718		NM_135357		Khc-73	CG8183|DmKIN73|DmKin73|DmKlp73|Dmel\CG8183|KHC-73|KIF 13A|KIF13A/B|KLP73|Khc73|Kin73|Kinesin-73|anon-EST:fe3C9|khc-73	Kinesin heavy chain 73	protein-coding
4974	chr2R	17058201	17058460	+	0	NA	exon (NM_058087, exon 5 of 5)	exon (NM_058087, exon 5 of 5)	-1495	NM_079042	36920	Dm.1503	NM_079042		tef	CG8961|Dmel\CG8961|l(2)k15914	teflon	protein-coding
14373	chrX	5865841	5866100	+	0	NA	promoter-TSS (NM_001258610)	promoter-TSS (NM_001258610)	-819	NM_001258610	12798120		NM_001258610		CG43137	Dmel\CG43137|lincRNA.952	uncharacterized protein	protein-coding
2337	chr2L	18705861	18706140	+	0	NA	promoter-TSS (NM_136057)	promoter-TSS (NM_136057)	-297	NM_136057	35128		NM_136057		Jwa	CG10373|Dmel\CG10373|GH05842p|djwa	Jwa	protein-coding
3460	chr2R	6668701	6669260	+	0	NA	promoter-TSS (NM_001273802)	promoter-TSS (NM_001273802)	-44	NM_136377	35568	Dm.6583	NM_136377		CG9410	Dmel\CG9410	CG9410	protein-coding
2803	chr2L	21652161	21652430	+	0	NA	Intergenic	BS2|LINE|Jockey	-5330	NR_124416	19834780		NR_124416		CR43144	CG43144|Dmel\CR43144|lincRNA.217	ncRNA	ncRNA
12803	chr3R	27921681	27923340	+	0	NA	promoter-TSS (NM_143339)	promoter-TSS (NM_143339)	-154	NM_143339	43348	Dm.11298	NM_143339		BCAS2	CG4980|Dmel\CG4980|dBCAS2	BCAS2	protein-coding
10854	chr3R	12502351	12502690	+	0	NA	promoter-TSS (NM_176486)	promoter-TSS (NM_176486)	10	NM_176486	50022	Dm.33563	NM_176486		Hsp70Bbb	CG31354|CG5834|Dm-hsp70|Dmel\CG5834|HSP70|HSP70Bbb|Hsp-70|Hsp70|Hsp70B|Hsp70Bb|dHsp70|hsp70|hsp70B|hsp70Bb-prime	Hsp70Bbb	protein-coding
11230	chr3R	15646631	15648400	+	0	NA	Intergenic	(T)n|Simple_repeat|Simple_repeat	10347	NM_001260193	12798414	Dm.38888	NM_001260193		CG43336	CG5302|Dmel\CG43336|SPH73	uncharacterized protein	protein-coding
5667	chr2R	22401861	22402120	+	0	NA	promoter-TSS (NM_137823)	promoter-TSS (NM_137823)	69	NM_137823	37557	Dm.4607	NM_137823		babos	CG3624|CT12183|Dmel\CG3624	babos	protein-coding
1224	chr2L	8943231	8943530	+	0	NA	promoter-TSS (NM_001032062)	promoter-TSS (NM_001032062)	-123	NM_001032062	3771965		NM_001032062		CG9515	BEST:GH06087|CG33085|Dmel\CG9515|gh06087	CG9515	protein-coding
2975	chr2R	101281	101530	+	0	NA	Intergenic	DOC5_DM|LINE|Jockey	-225363	NM_001347775	26067049	Dm.30444	NM_001347775		CG45781	40378|CG40378|CG42644|CG43676|Dmel\CG45781|Dmel_CG40378|Dmel_CG42644|Dmel_CG43676	uncharacterized protein	protein-coding
8801	chr3L	20815771	20816100	+	0	NA	promoter-TSS (NM_001014596)	promoter-TSS (NM_001014596)	104	NM_141005	40303	Dm.4163	NM_141005		CG3618	Dmel\CG3618|GYCb100B	CG3618	protein-coding
9373	chr3L	27444951	27445240	+	0	NA	Intergenic	Intergenic	-79105	NR_133316	26067560		NR_133316		CR46250	Dmel\CR46250	ncRNA	ncRNA
10342	chr3R	8834451	8834820	+	0	NA	TTS (NM_001104242)	TTS (NM_001104242)	10224	NM_206463	41060	Dm.2106	NM_141584		CG8379	Dmel\CG8379|anon-WO0118547.250	CG8379	protein-coding
15421	chrX	14082691	14082950	+	0	NA	Intergenic	Intergenic	-14779	NR_133523	26067553		NR_133523		CR46242	Dmel\CR46242|lincRNA.992	ncRNA	ncRNA
6870	chr3L	6124791	6125540	+	0	NA	promoter-TSS (NR_133177)	promoter-TSS (NR_133177)	-240	NR_133177	26067326		NR_133176		CR46005	Dmel\CR46005	ncRNA	ncRNA
9023	chr3L	22431181	22431860	+	0	NA	Intergenic	Intergenic	-6611	NR_133308	26067293		NR_133308		CR45966	Dmel\CR45966	ncRNA	ncRNA
11018	chr3R	13973031	13973870	+	0	NA	intron (NR_048386, intron 1 of 1)	intron (NR_048386, intron 1 of 1)	-1650	NM_169565	41704	Dm.10784	NM_142068		rdx	0869/09|BEST:GM07940|CG10235|CG12537|CG9924|D-SPOP|Dmel\CG12537|Dmel_CG9924|Dromel_CG9924_FBtr0082871_rdx_mORF|HIB|Hib|Rdx|SPOP|Spop|anon-WO0118547.577|hib|l(3)03477|l(3)2004|l(3)88Aa|l(3)A6|l(3)S086909|l(3)SG40|l(3)dsl-6|l(3)dsl6|l(3)j1D1|l(3)j4C7|mei-P19	roadkill	protein-coding
1329	chr2L	9963191	9964290	+	0	NA	promoter-TSS (NM_001273381)	promoter-TSS (NM_001273381)	15	NM_001259027	34327	Dm.378	NM_135490		CG5850	Dmel\CG5850	CG5850	protein-coding
11951	chr3R	21133901	21134570	+	0	NA	promoter-TSS (NM_142691)	promoter-TSS (NM_142691)	-27	NM_142691	42509	Dm.11085	NM_142691		Usp8	CG5798|CT18196|Dmel\CG5798|Q9VDD8|UBPY|UBPY/USP8|USP8|UbpY|Ubpy|dUBPY|ubpy|usp8	Ubiquitin specific protease 8	protein-coding
2589	chr2L	20374741	20375210	+	0	NA	promoter-TSS (NM_078883)	promoter-TSS (NM_078883)	-892	NM_078883	35307	Dm.27714	NM_078883		Ugt37a1	38C.41|CG11012|DmUgt37a1|DmeUgt37a1|Dmel\CG11012	UDP-glycosyltransferase 37a1	protein-coding
6456	chr3L	2688091	2688550	+	0	NA	intron (NM_001274409, intron 3 of 17)	intron (NM_001274409, intron 3 of 17)	23370	NM_139485	38337	Dm.15807	NM_139485		Fife	CG12187|CG14950|CG16976|CG43375|CG43955|Dmel\CG43955|Dmel_CG12187|Dmel_CG14950|Dmel_CG16976|Dmel_CG43375|anon-EST:Posey171|fife	fife	protein-coding
12338	chr3R	23820351	23820670	+	0	NA	promoter-TSS (NM_001104419)	promoter-TSS (NM_001104419)	-82	NM_001316615	42820		NM_001104419		CG34355	CG12492|CG13818|Dmel\CG34355|Dmel_CG12492|lincRNA.840	uncharacterized protein	protein-coding
13216	chr3R	31213191	31213700	+	0	NA	promoter-TSS (NM_170542)	promoter-TSS (NM_170542)	-13	NM_143593	43691	Dm.1383	NM_143593		CG1542	Dmel\CG1542|EBP2	CG1542	protein-coding
2449	chr2L	19325401	19325650	+	0	NA	non-coding (NR_124380, exon 1 of 1)	non-coding (NR_124380, exon 1 of 1)	-1842	NR_124381	19835692		NR_124381		CR45258	Dmel\CR45258	ncRNA	ncRNA
2333	chr2L	18693871	18694200	+	0	NA	intron (NM_001299126, intron 1 of 3)	intron (NM_001299126, intron 1 of 3)	1391	NM_136052	35123	Dm.459	NM_136052		CG10383	Dmel\CG10383	uncharacterized protein	protein-coding
10944	chr3R	13440171	13440490	+	0	NA	Intergenic	Intergenic	-1121	NR_037760	10178970		NR_037760		CR42756	Dmel\CR42756	ncRNA	ncRNA
3447	chr2R	6606851	6607970	+	0	NA	intron (NM_001103730, intron 1 of 6)	(CAGGTC)n|Simple_repeat|Simple_repeat	-3077	NM_001103729	35555	Dm.5288	NM_136371		jing	1.28|AEBP2|CG9397|CG9403|CT9093|Dmel\CG9397|Dmel_CG9403|Jing|l(2)01094|l(2)22F3	jing	protein-coding
15356	chrX	13396011	13396540	+	0	NA	promoter-TSS (NM_132656)	promoter-TSS (NM_132656)	445	NR_123897	19835305		NR_123897		CR44621	Dmel\CR44621|lincRNA.986	ncRNA	ncRNA
4869	chr2R	16182691	16183050	+	0	NA	exon (NM_206130, exon 5 of 8)	exon (NM_206130, exon 5 of 8)	1621	NM_206130	36791	Dm.646	NM_057812		Lis-1	CG8440|D-Lis1|DLIS-1|DLIS1|DLis-1|DLis1|Dlis-1|Dlis1|DmLIS1|Dmel\CG8440|LIS-1|Lis 1|Lis1|dLis1|l(2)k13209|l(2R)W8|lis-1|lis1|n(2)k11702	Lissencephaly-1	protein-coding
6045	chr2R	25100401	25100990	+	0	NA	intron (NM_001299947, intron 2 of 4)	intron (NM_001299947, intron 2 of 4)	-1503	NM_079141	38007	Dm.6651	NM_079141		lov	091y|91Y|BTB-III|BtbIII|CG16778|CG2672|Dmel\CG16778|Lov|TKR|Tkr|anon-G2|dTKR|g2|tkr	jim lovell	protein-coding
4680	chr2R	14852321	14852850	+	0	NA	promoter-TSS (NM_137151)	promoter-TSS (NM_137151)	68	NM_137151	36653	Dm.2168	NM_137151		SMC2	AAF58197|CG10212|DmSMC2|Dmel\CG10212|Smc2|dSMC2|smc-2	Structural maintenance of chromosomes 2	protein-coding
5157	chr2R	18356481	18358300	+	0	NA	promoter-TSS (NM_001169719)	promoter-TSS (NM_001169719)	-94	NM_001274145	44027	Dm.3258	NM_079939		sbb	Bks|Brakeless|CG5580|Dmel\CG5580|GM04742|Group IIa|Sbb|bks|disc6|l(2)04440|mtv|sbb/mtv	scribbler	protein-coding
4492	chr2R	13472021	13472520	+	0	NA	intron (NM_079998, intron 2 of 6)	intron (NM_079998, intron 2 of 6)	-5072	NM_001259370	12798442	Dm.37104	NM_001259370		CG43192	Dmel\CG43192|noncoding_6564|noncoding_6907	uncharacterized protein	protein-coding
229	chr2L	1491751	1492070	+	0	NA	promoter-TSS (NM_001272940)	promoter-TSS (NM_001272940)	-385	NM_164418	326175	Dm.26648	NM_164418		CG31928	CG10872|Dmel\CG31928	uncharacterized protein	protein-coding
12185	chr3R	22618431	22618770	+	0	NA	TTS (NM_170029)	TTS (NM_170029)	108	NM_142815	42671	Dm.20230	NM_142815		mRpL45	CG6949|Dmel\CG6949|MRP-L45|XI-2|l(3)A8|l(3)SG61|l(3)dsl-8|l(3)dsl8	mitochondrial ribosomal protein L45	protein-coding
1254	chr2L	9251901	9253420	+	0	NA	exon (NM_164850, exon 1 of 3)	exon (NM_164850, exon 1 of 3)	458	NM_135435	34245	Dm.21364	NM_135435		borr	BORR|Bor|Borr|CG4454|Dmel\CG4454|dBor	borealin-related	protein-coding
3749	chr2R	8757151	8757400	+	0	NA	intron (NM_001299283, intron 4 of 8)	intron (NM_001299283, intron 4 of 8)	8288	NM_136567	35866	Dm.3160	NM_136567		CG8740	BcDNA:GH05582|Dmel\CG8740	CG8740	protein-coding
2690	chr2L	21199511	21199790	+	0	NA	promoter-TSS (NM_165359)	promoter-TSS (NM_165359)	426	NM_001299192	35393	Dm.21557	NM_165361		CG31624	CG17401|Dmel\CG31624|Tes88	uncharacterized protein	protein-coding
3844	chr2R	9371711	9372040	+	0	NA	intron (NM_001273893, intron 4 of 7)	intron (NM_001273893, intron 4 of 7)	-8969	NM_144142	2768730	Dm.33498	NM_144142		CG12158	BcDNA:RH45738|Dmel\CG12158|anon-WO0153538.61	uncharacterized protein	protein-coding
7118	chr3L	8545361	8546980	+	0	NA	promoter-TSS (NM_001274660)	promoter-TSS (NM_001274660)	-505	NM_001259747	38978	Dm.894	NM_139981		rhea	CG6831|CT21159|Dmel\CG6831|Rhea|Talin|Tln|talin|tendrils	rhea	protein-coding
10927	chr3R	13291451	13291920	+	0	NA	TTS (NM_142015)	TTS (NM_142015)	1056	NM_169501	41632	Dm.11659	NM_169501		Osi22	CG8644|Dmel\CG8644	Osiris 22	protein-coding
12698	chr3R	26797331	26798100	+	0	NA	Intergenic	Intergenic	-1326	NM_079794	43222	Dm.2347	NM_079794		Tl	CG5490|CT17414|Dmel\CG5490|EP(3)1051|EP1051|Fs(1)Tl|Fs(3)Tl|T1|TL|TOL|Toll-1|Toll1|dToll|dToll1|mat(3)9|mel(3)10|mel(3)9|tl|toll|toll-1	Toll	protein-coding
8917	chr3L	21662231	21662570	+	0	NA	exon (NM_206420, exon 3 of 8)	exon (NM_206420, exon 3 of 8)	4178	NM_001275256	2768995	Dm.15065	NM_206420		CG43980	CG11250|CG33291|CG33292|Dmel\CG43980|Dmel_CG33291|Dmel_CG33292	uncharacterized protein	protein-coding
15932	chrX	18003751	18004280	+	0	NA	intron (NM_001258798, intron 5 of 15)	intron (NM_001258798, intron 5 of 15)	3591	NM_133033	32781	Dm.34094	NM_133033		CG12672	Dmel\CG12672	uncharacterized protein	protein-coding
6768	chr3L	5300681	5301080	+	0	NA	Intergenic	QUASIMODO_I-int|LTR|Gypsy	15571	NR_124791	19835301		NR_124791		CR45741	Dmel\CR45741	ncRNA	ncRNA
11055	chr3R	14298101	14298350	+	0	NA	promoter-TSS (NM_169573)	promoter-TSS (NM_169573)	0	NM_169573	41738	Dm.6607	NM_142095		CG12207	Dmel\CG12207	uncharacterized protein	protein-coding
7362	chr3L	10682991	10683550	+	0	NA	intron (NM_001274755, intron 1 of 8)	CpG	-7754	NM_140151	39213	Dm.6149	NM_140151		CG11811	Dmel\CG11811	uncharacterized protein	protein-coding
60	chr2L	276891	279200	+	0	NA	promoter-TSS (NM_001272882)	promoter-TSS (NM_001272882)	189	NM_001272883	33195	Dm.23831	NM_134668		CG17078	Dmel\CG17078|anon-21Cb	uncharacterized protein	protein-coding
8732	chr3L	20406671	20407050	+	0	NA	TTS (NM_140962)	TTS (NM_140962)	2590	NR_133284	26067300		NR_133283		CR45973	Dmel\CR45973	ncRNA	ncRNA
8537	chr3L	18819621	18820660	+	0	NA	intron (NM_140803, intron 1 of 5)	intron (NM_140803, intron 1 of 5)	535	NM_140803	40046	Dm.13637	NM_140803		CG14073	Dmel\CG14073|Nirvana	uncharacterized protein	protein-coding
6587	chr3L	3645751	3647470	+	0	NA	intron (NM_001104023, intron 3 of 5)	intron (NM_001104023, intron 3 of 5)	8161	NM_139566	38437	Dm.15743	NM_139566		CG10862	Dmel\CG10862	uncharacterized protein	protein-coding
6442	chr3L	2582771	2583020	+	0	NA	intron (NM_001274402, intron 2 of 18)	intron (NM_001274402, intron 2 of 18)	3359	NM_001274402	44030	Dm.1870	NM_079940		msn	6286|CG16973|DMSN|Dmel\CG16973|HGK|JNKKKK|MESR5|MSN|Msn|NIK|Nik|l(3)03349|l(3)06946|l(3)6286|l(3)j1E2|msm	misshapen	protein-coding
16309	chrX	20824771	20825230	+	0	NA	exon (NM_134565, exon 2 of 2)	exon (NM_134565, exon 2 of 2)	1456	NM_134566	33062	Dm.2607	NM_078701		shakB	2|3|6|CG12678|CG1321|CG15451|CG32508|CG34358|Dmel\CG34358|Dmel_CG12678|Dmel_CG32508|E81|FBpp0111481|Pas|R-9-29|R9-29|Shak B|Shak-B|ShakB|W3|inx8|l(1)19Eb|l(1)LB21|l(1)R-10-14|l(1)R-10-3|l(1)R-10-7|l(1)R-9-29|l(1)TH73|l(1)W3|l(1)W3b|lincRNA.1031|nj-156|nj156|pas|pass|shB|shak-B|shkB	shaking B	protein-coding
10868	chr3R	12639091	12639390	+	0	NA	TTS (NM_141962)	TTS (NM_141962)	759	NM_141961	41556		NM_141961		CG11608	Dmel\CG11608	uncharacterized protein	protein-coding
14988	chrX	10365861	10366420	+	0	NA	TTS (NM_167225)	TTS (NM_167225)	133	NM_001316627	31964	Dm.123	NM_132393		l(1)G0289	CG2221|Dmel\CG2221|Mgn1457	lethal (1) G0289	protein-coding
7041	chr3L	7978501	7982000	+	0	NA	intron (NM_001274626, intron 2 of 8)	intron (NM_001274626, intron 2 of 8)	1204	NM_168252	38890	Dm.3990	NM_079243		nmo	CG7892|Dmel\CG7892|NEMO|NEMO/NLK|NLK|Nemo|Nlk|Nmo|ORE-6|adk|adk1|anon-EST:Gibbs3|anon-EST:Liang-2.43|anon-WO0118547.332|anon-WO0140519.256|anon-WO0172774.138|clone 2.43	nemo	protein-coding
5257	chr2R	19286991	19287270	+	0	NA	promoter-TSS (NM_137561)	promoter-TSS (NM_137561)	-400	NM_137560	37211	Dm.27772	NM_137560		CG10474	Dmel\CG10474	uncharacterized protein	protein-coding
11673	chr3R	18906431	18907010	+	0	NA	5' UTR (NM_169838, exon 1 of 2)	5' UTR (NM_169838, exon 1 of 2)	111	NM_001275788	42265	Dm.3503	NM_138767		EndoA	CG14296|D-endo|D-endoA|Dendo-A|Dmel\CG14296|Endo|endo|endoA	Endophilin A	protein-coding
6079	chr2R	25257541	25258050	+	0	NA	Intergenic	Intergenic	-2477	NM_001274250	38011	Dm.14982	NM_166707		CG9380	Dmel\CG9380	CG9380	protein-coding
15066	chrX	11087391	11087790	+	0	NA	Intergenic	Intergenic	-1291	NM_078559	32039		NM_078559		sev	7LES|7less|CG18085|CT3980|DROSEV|DROSEV1|DmHD-265|Dmel\CG18085|HD-265|SEV|Sev|sev(AC)[[14]]	sevenless	protein-coding
4122	chr2R	11144841	11145630	+	0	NA	intron (NM_001273951, intron 3 of 8)	intron (NM_001273951, intron 3 of 8)	-1054	NM_136794	36169	Dm.16186	NM_136794		CG13231	Dmel\CG13231	uncharacterized protein	protein-coding
7402	chr3L	11008521	11009500	+	0	NA	promoter-TSS (NM_057714)	promoter-TSS (NM_057714)	-177	NM_001274761	39228	Dm.4755	NM_057714		klu	CG12296|Dmel\CG12296|KLU|Klu|P09036|l(3)09036|l(3)10052	klumpfuss	protein-coding
13359	chr4	96981	97250	+	0	NA	intron (NM_001258477, intron 10 of 11)	intron (NM_001258477, intron 10 of 11)	6760	NM_166724	43769	Dm.17803	NM_079880		pan	CG17964|CG32005|CG34403|DTCF|DTcf|Dm Pan|Dmel\CG34403|Dmel_CG17964|Dmel_CG32005|IA5|LEF-1|LEF/TCF|LEF/TCF-1|LEF1|LEF1/TCF|Lef|Lef1|PAN|Pan|TCF|TCF/LEF|TCF/LEF1|TCF/Pan|Tcf|Tcf-1|Tcf/LEF|d-TCF|dTCF|dTcf|l(4)102ABb|l(4)13|lef1|pan.dTCF|tcf	pangolin	protein-coding
2313	chr2L	18506751	18507500	+	0	NA	Intergenic	Intergenic	-2435	NM_001259150	35105	Dm.23888	NM_136038		CG10178	Dmel\CG10178	uncharacterized protein	protein-coding
10715	chr3R	11431141	11432470	+	0	NA	promoter-TSS (NM_141817)	promoter-TSS (NM_141817)	67	NM_141817	41373	Dm.1150	NM_141817		CG5276	Dmel\CG5276	CG5276	protein-coding
5824	chr2R	23577101	23578190	+	0	NA	intron (NM_166609, intron 1 of 4)	intron (NM_166609, intron 1 of 4)	-3445	NM_057832	37734	Dm.6653	NM_057831		apt	3041|Apt|CG5393|Dmel\CG5393|TDF|TDF/APT|l(2)03041|l(2)06369|l(2)09049|l(2)59Ea|l(2)k11531|tdf	apontic	protein-coding
8713	chr3L	20296961	20297260	+	0	NA	promoter-TSS (NM_140945)	promoter-TSS (NM_140945)	-139	NM_140945	40228	Dm.15115	NM_140945		FRG1	CG6480|DmFRG1|Dmel\CG6480|dFRG1	FSHD region gene 1	protein-coding
11796	chr3R	19818531	19819820	+	0	NA	intron (NM_001300482, intron 2 of 5)	intron (NM_001300482, intron 2 of 5)	17642	NM_169874	42356	Dm.2390	NM_169874		bnl	BNL|Bnl|CG4608|DFGF|DmBnl|Dmel\CG4608|FGF|dFGF|l(3)06916|l(3)neo52	branchless	protein-coding
5650	chr2R	22293031	22293690	+	0	NA	promoter-TSS (NM_166523)	promoter-TSS (NM_166523)	-40	NM_001259529	37547	Dm.13384	NM_137816		CG5819	5819|CT18212|Dmel\CG5819|tartan/capricious-like	CG5819	protein-coding
267	chr2L	1949621	1950230	+	0	NA	TTS (NM_001272961)	TTS (NM_001272961)	-3197	NM_001032047	3772423	Dm.30799	NM_001032047		CG33673	Dmel\CG33673	uncharacterized protein	protein-coding
12540	chr3R	25189851	25192260	+	0	NA	exon (NM_143089, exon 2 of 2)	exon (NM_143089, exon 2 of 2)	2721	NM_001043292	4379864	Dm.16505	NM_001043292		lobo	CG13661|CG13662|CG34110|Dmel\CG34110	lost boys	protein-coding
2004	chr2L	15410061	15410450	+	0	NA	Intergenic	Intergenic	8106	NM_001299025	19834832		NM_001299025		CG44869	Dmel\CG44869	uncharacterized protein	protein-coding
9963	chr3R	6345591	6346180	+	0	NA	promoter-TSS (NM_141389)	promoter-TSS (NM_141389)	26	NM_141388	40781	Dm.9898	NM_141388		SmD2	BcDNA:LD03002|CG1249|D2-Sm|Dmel\CG1249|SMD2_DROME|dD2|snRNP D2|snRNP2	Small ribonucleoprotein particle protein SmD2	protein-coding
16202	chrX	19885281	19885560	+	0	NA	TTS (NM_078692)	TTS (NM_078692)	-1933	NM_001038766	33000	Dm.31021	NM_134516		Hers	CG11936|CG15619|CG32529|Dmel\CG32529|HERS	Histone gene-specific Epigenetic Repressor in late S phase	protein-coding
4653	chr2R	14619701	14620490	+	0	NA	TTS (NM_143780)	TTS (NM_143780)	1225	NM_137129	36623		NM_137129		CG12863	Dmel\CG12863	uncharacterized protein	protein-coding
16469	chrX	23091151	23091400	+	0	NA	non-coding (NR_047707, exon 2 of 5)	non-coding (NR_047707, exon 2 of 5)	951	NR_047706	12798148		NR_047706		CR43480	Dmel\CR43480	ncRNA	ncRNA
7785	chr3L	13673351	13673630	+	0	NA	intron (NM_001274878, intron 4 of 13)	intron (NM_001274878, intron 4 of 13)	-6741	NM_001202166	39527	Dm.13624	NM_079335		bru3	Bru-3|CG10046|CG12478|CG34243|CG43744|Dm Bru-3|Dmel\CG43744|Dmel_CG12478|Dmel_CG34243|bru-3|bruno-3|cg10046|cg12478|l(3)05871	bruno 3	protein-coding
7331	chr3L	10389751	10390160	+	0	NA	Intergenic	Intergenic	3505	NR_124853	19836132		NR_124853		CR45245	Dmel\CR45245	ncRNA	ncRNA
2134	chr2L	16487671	16487980	+	0	NA	promoter-TSS (NM_135951)	promoter-TSS (NM_135951)	-323	NM_135951	34983		NM_135951		CG4580	Dmel\CG4580	CG4580	protein-coding
8009	chr3L	15146251	15147030	+	0	NA	promoter-TSS (NM_140497)	promoter-TSS (NM_140497)	-497	NM_140497	39653	Dm.4691	NM_140497		FucTA	3-FucT|CG6869|Dm alpha1|Dmel\CG6869|anon-EST:Posey285|fucTA	FucTA	protein-coding
11400	chr3R	16709381	16709710	+	0	NA	intron (NM_080500, intron 1 of 1)	intron (NM_080500, intron 1 of 1)	24881	NM_080504	42034	Dm.21668	NM_080500		Ubx	BX-C|Bxl|CG10388|Cbx|DUbx|Dm Ubx|DmUbx|Dmel\CG10388|Hm|UBX|UBx|Uab|Ubx1b|abx|bx|bx[D]|bxd|bxd[D]|bxl|l(3)89Eb|pbx|ubx	Ultrabithorax	protein-coding
7367	chr3L	10735731	10735990	+	0	NA	Intergenic	A-rich|Low_complexity|Low_complexity	-36065	NM_001274759	12798172	Dm.33178	NM_001259780		CG43245	Dmel\CG43245	uncharacterized protein	protein-coding
11407	chr3R	16740831	16741380	+	0	NA	Intergenic	Intergenic	5281	NR_002032	3772220		NR_002032		bxd	CR31273|CR31277|Dmel\CR31273	bithoraxoid	ncRNA
11637	chr3R	18328581	18329270	+	0	NA	promoter-TSS (NM_169806)	promoter-TSS (NM_169806)	17	NM_001300458	42204	Dm.6102	NM_169806		CG31235	CG14311|CG7117|Dmel\CG31235	uncharacterized protein	protein-coding
14676	chrX	7952911	7953230	+	0	NA	TTS (NM_132201)	TTS (NM_132201)	2920	NM_132201	31714	Dm.17614	NM_132201		CG15332	Dmel\CG15332	uncharacterized protein	protein-coding
6638	chr3L	4017411	4017730	+	0	NA	Intergenic	Intergenic	-1308	NM_001259680	38471	Dm.23970	NM_079188		fd64A	CG1132|Dmel\CG1132|Dmfd2|FD2|FoxL1|fd2	forkhead domain 64A	protein-coding
6150	chr3L	422471	423190	+	0	NA	Intergenic	Intergenic	11076	NM_138192	38066	Dm.15940	NM_138192		CG13891	Dmel\CG13891	uncharacterized protein	protein-coding
1841	chr2L	14026671	14028000	+	0	NA	exon (NM_135852, exon 1 of 2)	exon (NM_135852, exon 1 of 2)	334	NM_135852	34822	Dm.11081	NM_135852		hll	2a9|BG:DS05899.1|CG4500|Dmel\CG4500|I|anon-EST:CL2a9|dbb	heimdall	protein-coding
374	chr2L	2907761	2908050	+	0	NA	intron (NM_001347818, intron 2 of 10)	intron (NM_001347818, intron 2 of 10)	17734	NM_001144303	33496	Dm.2778	NM_078740		lilli	154454_at|189Y|AFF4|BEST:GH09955|BcDNA:GM02019|CG8817|Dmel\CG8817|Lilli|S(ls)4|SS2-1|SY2-1|Su(Raf)2A|Su(Raf)2a|dAFF4|l(2)00632|l(2)23Cc|l(2)K00632|l(2)K07920|l(2)k07920|l(2)k16124	lilliputian	protein-coding
6293	chr3L	1391271	1391660	+	0	NA	intron (NM_001274324, intron 3 of 7)	CpG	-7121	NM_001104002	317977		NM_001104002		CG32320	Dmel\CG32320	uncharacterized protein	protein-coding
3585	chr2R	7509941	7510190	+	0	NA	TTS (NM_136445)	TTS (NM_136445)	292	NM_136444	35681	Dm.4770	NM_136444		CG12736	Dmel\CG12736	uncharacterized protein	protein-coding
11930	chr3R	20976091	20976370	+	0	NA	TTS (NM_001170196)	TTS (NM_001170196)	-1953	NM_079699	42481	Dm.2389	NM_079699		Calx	9C5|CALX|CALX1.1|CG5685|CalX|Dmel/Ncx|Dmel\CG5685|NCX|Ncx|anon-93ABa|calX|calx	Na/Ca-exchange protein	protein-coding
15101	chrX	11426811	11427060	+	0	NA	intron (NM_001298192, intron 2 of 4)	intron (NM_001298192, intron 2 of 4)	2978	NM_001298193	32087	Dm.135	NM_078568		Gs2	CG1743|Dmel\CG1743|GS2|GsII|gs-c|gs2	Glutamine synthetase 2	protein-coding
1057	chr2L	7843311	7843590	+	0	NA	Intergenic	Intergenic	2998	NM_135311	34072	Dm.5237	NM_135311		CG14537	BcDNA:AT11469|Dmel\CG14537	uncharacterized protein	protein-coding
8640	chr3L	19629501	19630190	+	0	NA	intron (NM_140880, intron 2 of 7)	intron (NM_140880, intron 2 of 7)	3251	NM_001202203	40143	Dm.12913	NM_140880		wnd	CG8789|DLK|DLK/ZPK|Dmel\CG8789|MAPKKK|Wnd|Wnd/DLK	wallenda	protein-coding
13708	chrX	763211	764050	+	0	NA	promoter-TSS (NR_003724)	promoter-TSS (NR_003724)	180	NR_033152	8673998		NR_033152		CR42491	Dmel\CR42491	ncRNA	ncRNA
15104	chrX	11452681	11453520	+	0	NA	intron (NM_132488, intron 1 of 8)	intron (NM_132488, intron 1 of 8)	1238	NM_132488	32088	Dm.3712	NM_132488		Evi5	BcDNA:GH08923|BcDNA:LD11130|CG11727|Dmel\CG11727|MRE21	Ecotropic viral integration site 5	protein-coding
11688	chr3R	18989801	18990640	+	0	NA	intron (NM_169845, intron 1 of 5)	intron (NM_169845, intron 1 of 5)	6195	NM_001104364	53563	Dm.1249	NM_169845		gukh	CG14287|CG14288|CG31043|CG5456|CG6003|Dmel\CG31043|GUKH|GUKh|GukH|Gukh|anon-WO0118547.205	GUK-holder	protein-coding
1525	chr2L	11280011	11280600	+	0	NA	promoter-TSS (NM_135656)	promoter-TSS (NM_135656)	7	NM_135656	34564	Dm.406	NM_135656		Ppt2	CG4851|Dmel\CG4851|PPT-2	Palmitoyl-protein Thioesterase 2	protein-coding
5379	chr2R	20110811	20113140	+	0	NA	exon (NM_057466, exon 1 of 1)	exon (NM_057466, exon 1 of 1)	464	NM_057466	37277	Dm.4118	NM_057466		18w	18-w|18-wheeler|18W|CG8896|CT25100|Dmel\CG8896|Toll-2|l(2)00053|tlr|toll	18 wheeler	protein-coding
2495	chr2L	19575061	19578080	+	0	NA	promoter-TSS (NM_001032110)	promoter-TSS (NM_001032110)	745	NM_057561	35253	Dm.4573	NM_057561		spi	CG10334|CT29014|Dmel\CG10334|EP(2)2378|Spi|Spitz|anon-WO0118547.158|l(2)01068|l(2)37Fa|l(2)s3547|s-spi|sSpi	spitz	protein-coding
1572	chr2L	11621661	11621960	+	0	NA	5' UTR (NM_078827, exon 4 of 4)	5' UTR (NM_078827, exon 4 of 4)	-10038	NM_135666	34581		NM_135666		spag4	CG6589|Dmel\CG6589|Dspag4|Spag4|dspag|giac	sperm-associated antigen 4	protein-coding
8811	chr3L	21005631	21006100	+	0	NA	TTS (NR_048303)	TTS (NR_048303)	655	NR_048303	12798435		NR_048303		scaRNA:PsiU6-40	CR43601|Dmel\CR43601|pugU6-40|snoRNA:skd-a	small Cajal body-specific RNA : PsiU6-40	ncRNA
2594	chr2L	20458991	20459650	+	0	NA	promoter-TSS (NM_001273699).2	promoter-TSS (NM_001273699).2	-22	NM_136192	35315	Dm.30789	NM_136192		Cdc23	38C.54|APC8|Apc8|CDC23|CG2508|CG2508-PA|Dmel\CG2508|cdc23	Cell division cycle 23	protein-coding
13087	chr3R	30172881	30173630	+	0	NA	exon (NM_079847, exon 3 of 3)	exon (NM_079847, exon 3 of 3)	1296	NM_079847	43587	Dm.1488	NM_079847		Mlc2	CG2184|DmMLC2|Dmel\CG2184|Dmlc|Dmlc2|Ifm(3)99Eb|LC2|MLC|MLC 2|MLC-2|MLC2|MRLC|MYL2|RLC|RLC1|RLC2|dMLC-2|dro MLC-2|l(3)99Eb|mlc-2|mlc2|myosin	Myosin light chain 2	protein-coding
13941	chrX	2391071	2391550	+	0	NA	Intergenic	(CACAG)n|Simple_repeat|Simple_repeat	-3646	NM_130646	31224	Dm.12239	NM_130645		PsGEF	CG14045|CG14047|CG43947|DmPsGEF|Dmel\CG43947|Dmel_CG14045|Dmel_CG14047|EG:BACH48C10.4|EG:BACH7M4.1|EG:BACH7M4.2|FBgn0264598|PsGef|null	Protostome-specific GEF	protein-coding
12093	chr3R	21803891	21804420	+	0	NA	5' UTR (NM_001104392, exon 3 of 14)	5' UTR (NM_001104392, exon 3 of 14)	3747	NM_169970	42567	Dm.7404	NM_079717		CASK	CAKI|CAMGUK|CASK-beta|CG13412|CG13413|CG6703|CMG|CMG/CASK|Caki|CamGUK|CamguK|Camguk|Cask|Cmg|DLin-2|Dmel\CG6703|RE09582p|caki|camguk|cask|cmg|dCASK	CASK	protein-coding
13433	chr4	457491	457770	+	0	NA	Intergenic	PROTOP_A|DNA|P	-2138	NR_123746	19835758		NR_123746		CR45126	Dmel\CR45126	ncRNA	ncRNA
4508	chr2R	13555431	13558600	+	0	NA	TTS (NR_048104)	TTS (NR_048104)	671	NR_003793	5740719	Dm.36233	NR_003793		snoRNA:Psi28S-1153	CR34531|Dmel\CR34531|Psi 28S-1153|chr2R:9073472..9073780|psi28s-1153	ncRNA	ncRNA
9178	chr3L	23833781	23834110	+	0	NA	Intergenic	IDEFIX_I-int|LTR|Gypsy	49197	NR_073975	14462916		NR_073975		CR43941	Dmel\CR43941	ncRNA	ncRNA
743	chr2L	5689071	5689340	+	0	NA	Intergenic	Intergenic	-1324	NR_124097	19834778		NR_124097		CR44819	Dmel\CR44819	ncRNA	ncRNA
4352	chr2R	12554481	12554900	+	0	NA	intron (NM_001299424, intron 1 of 9)	intron (NM_001299424, intron 1 of 9)	-7370	NM_165914	246422		NM_165914		CG30056	Dmel\CG30056|NEST:bs07b11|NEST:bs07h07|NEST:bs33g02	uncharacterized protein	protein-coding
14250	chrX	4667041	4667420	+	0	NA	promoter-TSS (NM_001169195)	promoter-TSS (NM_001169195)	-530	NM_001169194	31402	Dm.31072	NM_131952		CG3009	Dmel\CG3009	CG3009	protein-coding
3557	chr2R	7395051	7396310	+	0	NA	exon (NM_136426, exon 2 of 5)	exon (NM_136426, exon 2 of 5)	252	NM_136426	35656	Dm.12136	NM_136426		Glo1	CG1707|Dmel\CG1707|glo1	Glyoxalase 1	protein-coding
13473	chr4	649821	650080	+	0	NA	TTS (NM_001014691)	TTS (NM_001014691)	-3394	NM_143674	43806	Dm.14094	NM_143674		Ekar	CG9935|CT36399|DmelCG9935|Dmel\CG9935|ekar	Eye-enriched kainate receptor	protein-coding
12276	chr3R	23282891	23283340	+	0	NA	promoter-TSS (NM_142881)	promoter-TSS (NM_142881)	-887	NM_142881	42754	Dm.12668	NM_142881		CG6763	Dmel\CG6763	CG6763	protein-coding
2044	chr2L	15747121	15748840	+	0	NA	promoter-TSS (NR_124290)	promoter-TSS (NR_124290)	-21	NR_124290	19834840		NR_124290		CR44866	Dmel\CR44866	ncRNA	ncRNA
377	chr2L	2947171	2947430	+	0	NA	exon (NM_001144303, exon 4 of 12)	exon (NM_001144303, exon 4 of 12)	737	NM_001144300	33496	Dm.2778	NM_078740		lilli	154454_at|189Y|AFF4|BEST:GH09955|BcDNA:GM02019|CG8817|Dmel\CG8817|Lilli|S(ls)4|SS2-1|SY2-1|Su(Raf)2A|Su(Raf)2a|dAFF4|l(2)00632|l(2)23Cc|l(2)K00632|l(2)K07920|l(2)k07920|l(2)k16124	lilliputian	protein-coding
1081	chr2L	8005821	8006220	+	0	NA	intron (NM_135328, intron 1 of 1)	intron (NM_135328, intron 1 of 1)	1190	NM_135328	34091	Dm.18230	NM_135328		Spn28Dc	CG7219|Dm-Spn28D|Dmel\CG7219|Spn28D|spn28D	Serpin 28Dc	protein-coding
6395	chr3L	2155451	2155930	+	0	NA	intron (NM_001144400, intron 8 of 9)	intron (NM_001144400, intron 8 of 9)	-3990	NM_206240	2769001	Dm.15849	NM_206240		zormin	BcDNA:GH09541|CG11850|CG11952|CG11953|CG1282|CG32307|CG32309|CG32310|CG32311|CG33484|CG5699|CT36990|Dmel\CG33484	zormin	protein-coding
388	chr2L	2995521	2995840	+	0	NA	exon (NM_001144305, exon 4 of 7)	exon (NM_001144305, exon 4 of 7)	2707	NM_143807	48421	Dm.10651	NM_143807		CG3558	BEST:LD23852|Dmel\CG3558|FBgn0025681|LD23852|c4.3	CG3558	protein-coding
13969	chrX	2468181	2468980	+	0	NA	intron (NM_166940, intron 2 of 8)	intron (NM_166940, intron 2 of 8)	1463	NM_166940	31229	Dm.40	NM_166940		boi	Boi|CG13756|CG32796|CG7894|CT23737|CT33235|Dmel\CG32796|EG:BACH59J11.2	brother of ihog	protein-coding
12723	chr3R	27015721	27016370	+	0	NA	intron (NM_001300623, intron 1 of 7)	ROO_I-int|LTR|Pao	2242	NM_143265	43248	Dm.27426	NM_143265		CG17192	DmelL5|Dmel\CG17192	uncharacterized protein	protein-coding
11258	chr3R	15899011	15899590	+	0	NA	intron (NM_001300414, intron 1 of 3)	A-rich|Low_complexity|Low_complexity	2082	NM_079645	41930	Dm.2296	NM_079645		glob1	CG9734|DmHb|DmHb1|DmeGb1|DmeGlob1|Dmel\CG9734|Glob1|Hb|dmeglob1|globin1	globin 1	protein-coding
8746	chr3L	20495091	20495470	+	0	NA	promoter-TSS (NM_140976)	promoter-TSS (NM_140976)	-67	NM_001275187	40272	Dm.7124	NM_140977		ND-39	CG6020|Dmel\CG6020|GM13757p|NDUFA9|NUEM|Ndufa9	NADH dehydrogenase (ubiquinone) 39 kDa subunit	protein-coding
4816	chr2R	15847921	15848320	+	0	NA	promoter-TSS (NM_137217)	promoter-TSS (NM_137217)	-459	NM_137217	36743	Dm.3987	NM_137217		tun	BcDNA:LD38553|CG8253|Dmel\CG8253|Ntaq1	tungus	protein-coding
8645	chr3L	19642501	19642870	+	0	NA	5' UTR (NM_001144508, exon 1 of 4)	5' UTR (NM_001144508, exon 1 of 4)	131	NM_140881	40144	Dm.6362	NM_140881		CG8786	BcDNA:GM01527|DRNF146|Dmel\CG8786|RNF146	CG8786	protein-coding
5517	chr2R	21200081	21200560	+	0	NA	promoter-TSS (NM_166432)	promoter-TSS (NM_166432)	-163	NM_001299738	37419	Dm.30881	NM_166432		Glycogenin	CG44244|CG9480|Dmel\CG44244|Dmel_CG9480|NEST:bs16a02	glycogenin	protein-coding
14987	chrX	10359761	10360190	+	0	NA	exon (NM_132393, exon 2 of 7)	exon (NM_132393, exon 2 of 7)	6298	NM_001316627	31964	Dm.123	NM_132393		l(1)G0289	CG2221|Dmel\CG2221|Mgn1457	lethal (1) G0289	protein-coding
7122	chr3L	8600731	8601400	+	0	NA	promoter-TSS (NM_139984)	promoter-TSS (NM_139984)	59	NM_079251	38983	Dm.895	NM_079251		RpL14	CG6253|Dmel\CG6253|L14|M(3)|M(3)66|M(3)66D|M66D|RPL14|Rp L14|anon-EST:Posey193U|anon-EST:Posey6|rpl14	Ribosomal protein L14	protein-coding
7120	chr3L	8561521	8562020	+	0	NA	exon (NM_139981, exon 3 of 16)	exon (NM_139981, exon 3 of 16)	1602	NM_139981	38978	Dm.894	NM_139981		rhea	CG6831|CT21159|Dmel\CG6831|Rhea|Talin|Tln|talin|tendrils	rhea	protein-coding
11780	chr3R	19678231	19678760	+	0	NA	intron (NM_169872, intron 1 of 6)	intron (NM_169872, intron 1 of 6)	7045	NM_169872	42348	Dm.11811	NM_169872		Naam	AAM52663|CG31216|CG7444|CG7500|D-NAAM|Dmel\CG31216|anon-WO0172774.59|anon-WO0172774.60	Nicotinamide amidase	protein-coding
391	chr2L	3006801	3007660	+	0	NA	intron (NM_134890, intron 1 of 3)	intron (NM_134890, intron 1 of 3)	7944	NM_134890	33509	Dm.283	NM_134890		CG17265	Dmel\CG17265	uncharacterized protein	protein-coding
2518	chr2L	19731231	19731600	+	0	NA	TTS (NM_001038826)	TTS (NM_001038826)	4305	NM_001038825	35260	Dm.12147	NM_136152		CG10462	BcDNA:SD07008|Dmel\CG10462	uncharacterized protein	protein-coding
879	chr2L	6610681	6612160	+	0	NA	promoter-TSS (NM_164695)	promoter-TSS (NM_164695)	14	NM_164694	33924		NM_135208		CG11050	BcDNA:LD22339|Dmel\CG11050	uncharacterized protein	protein-coding
12163	chr3R	22447441	22448450	+	0	NA	promoter-TSS (NM_001104402)	promoter-TSS (NM_001104402)	-154	NM_170013	42638	Dm.16607	NM_170013		CG34376	CG13845|CG13846|CG13851|CG31160|Dmel\CG34376|Dmel_CG13845|Dmel_CG31160	uncharacterized protein	protein-coding
435	chr2L	3532131	3532790	+	0	NA	exon (NM_134948, exon 3 of 3)	exon (NM_134948, exon 3 of 3)	1671	NM_134948	33579	Dm.26722	NM_134948		IFT57	CG8853|CHE-13|Che-13|Dmel\CG8853|Hippi|IFT55|che-13	Intraflagellar transport 57	protein-coding
10385	chr3R	9016431	9017040	+	0	NA	TTS (NM_169254)	TTS (NM_169254)	1289	NM_141605	41083	Dm.1113	NM_141605		CG11986	Dmel\CG11986	uncharacterized protein	protein-coding
16099	chrX	19268461	19269360	+	0	NA	promoter-TSS (NM_133145)	promoter-TSS (NM_133145)	-14	NM_133145	32921	Dm.4247	NM_133145		CG8010	Dmel\CG8010	CG8010	protein-coding
5795	chr2R	23314601	23314970	+	0	NA	promoter-TSS (NM_001259549)	promoter-TSS (NM_001259549)	-931	NM_001259549	12798145	Dm.38873	NM_001259549		HP1Lcsd	CG43352|Dmel\CG43352|lincRNA.384	Heterochromatin Protein 1L chromoshadow domain	protein-coding
13158	chr3R	30759181	30759490	+	0	NA	Intergenic	Intergenic	-6591	NM_170522	43650	Dm.4708	NM_057502		zfh1	CG1322|Dmel\CG1322|ZFH-1|ZFH1|Zfh-1|Zfh1|Zfh1a|l(3)00865|zfh-1|zfl-1|zhf1	Zn finger homeodomain 1	protein-coding
2723	chr2L	21424231	21425350	+	0	NA	promoter-TSS (NM_001032216).2	promoter-TSS (NM_001032216).2	215	NM_001032176	3771947	Dm.5747	NM_001032176		His4:CG33883	CG33883|Dmel\CG33883	histone H4	protein-coding
1787	chr2L	13597111	13597740	+	0	NA	promoter-TSS (NM_135820)	promoter-TSS (NM_135820)	-239	NM_135820	34773	Dm.30834	NM_135820		CG9254	BG:DS07660.1|DS07660.1|Dmel\CG9254	CG9254	protein-coding
7634	chr3L	12627041	12627330	+	0	NA	promoter-TSS (NR_124908)	promoter-TSS (NR_124908)	-749	NR_124907	19835082		NR_124907		CR32111	CG32111|Dmel\CR32111	ncRNA	ncRNA
14375	chrX	5876751	5877010	+	0	NA	promoter-TSS (NM_078496)	promoter-TSS (NM_078496)	-27	NM_078496	31518	Dm.2952	NM_078496		mof	CG3025|Dmel\CG3025|MOF|Mof|dMOF|dmMOF|max	males absent on the first	protein-coding
10203	chr3R	8028981	8029350	+	0	NA	exon (NM_080169, exon 1 of 1)	exon (NM_080169, exon 1 of 1)	381	NM_080169	48239	Dm.1524	NM_080169		ImpE3	CG11046|CG2723|Dmel\CG2723|IMP-E3|Imp-E3	Ecdysone-inducible gene E3	protein-coding
6970	chr3L	7155551	7157480	+	0	NA	5' UTR (NM_168193, exon 1 of 8)	5' UTR (NM_168193, exon 1 of 8)	558	NM_001274568	38786	Dm.2859	NM_079230		corn	CG32386|CG32390|CG42278|CG8621|Dmel\CG42278|Dmel_CG32386|Dmel_CG32390	cornetto	protein-coding
16313	chrX	20846341	20846610	+	0	NA	intron (NM_001258858, intron 2 of 10)	intron (NM_001258858, intron 2 of 10)	-18338	NR_133533	26067103		NR_133533		CR43193	CG43193|Dmel\CR43193|mdcds_58258	ncRNA	ncRNA
574	chr2L	4454221	4454730	+	0	NA	promoter-TSS (NM_144084)	promoter-TSS (NM_144084)	-22	NM_134993	33652	Dm.4903	NM_134993		CG15440	Dmel\CG15440|Secp43|cg15440	uncharacterized protein	protein-coding
401	chr2L	3068521	3068850	+	0	NA	TTS (NM_001103594)	TTS (NM_001103594)	3686	NM_001103594	33526	Dm.7877	NM_057805		toc	BA34|BcDNA:LD27161|CG9660|Dmel\CG9660|Toc|l(2)01361|l(2)05527|l(2)K08224|l(2)k08224	toucan	protein-coding
1097	chr2L	8120331	8120630	+	0	NA	exon (NM_001038795, exon 7 of 13)	exon (NM_001038795, exon 7 of 13)	3530	NM_001298810	326157	Dm.21374	NM_001038795		mon2	CG14276|CG31756|CG8683|Dmel\CG8683|Mon2|noan	monensin sensitivity 2	protein-coding
7277	chr3L	9853641	9857120	+	0	NA	promoter-TSS (NM_168382)	promoter-TSS (NM_168382)	-95	NM_168382	39158	Dm.919	NM_079290		RasGAP1	CG6721|Dmel\CG6721|FBpp0076097|GAP|GAP1|Gap|Gap 1|Gap1|Ras-GAP|RasGAP|RasGap1|gap|gap1|mip|rI533|rasGAP|sxt	Ras GTPase activating protein 1	protein-coding
5057	chr2R	17758741	17759190	+	0	NA	intron (NM_057954, intron 2 of 2)	intron (NM_057954, intron 2 of 2)	1560	NM_057954	37027	Dm.4839	NM_057954		HLH54F	CG5005|Dmel\CG5005|HLH102C|HLH54F-Dm|bHLH54F|bHLHa9	HLH54F	protein-coding
3240	chr2R	4841521	4841780	+	0	NA	Intergenic	Gypsy2-LTR_DM|LTR|Gypsy	12404	NM_001043001	3355132	Dm.23697	NM_001043001		CG14464	BcDNA:LD29015|CG40285|Dmel\CG14464	uncharacterized protein	protein-coding
2997	chr2R	1062641	1062960	+	0	NA	Intergenic	Intergenic	8519	NR_125317	19835919		NR_125317		CR41257	CG41257|Dmel\CR41257	ncRNA	ncRNA
1185	chr2L	8625571	8626140	+	0	NA	intron (NM_001201802, intron 4 of 22)	intron (NM_001201802, intron 4 of 22)	-31366	NR_073744	14462727		NR_073744		CR43855	Dmel\CR43855	ncRNA	ncRNA
4474	chr2R	13263311	13263670	+	0	NA	intron (NM_137017, intron 3 of 5)	intron (NM_137017, intron 3 of 5)	1005	NM_165978	36473	Dm.6322	NM_137016		CG42319	CG17041|CG17042|Dmel\CG42319|Dmel_CG17041|Dmel_CG17042	uncharacterized protein	protein-coding
8671	chr3L	19882611	19882900	+	0	NA	TTS (NM_001275148)	TTS (NM_001275148)	6059	NM_001275149	40170	Dm.28317	NM_140897		Mi-2	0006/06|0854/01|CG8103|Chd4|Dm-Mi-2|Dmel\CG8103|M-i2|MI-2|MI2|Mi 2|Mi2|Pha|dMI-2|dMi|dMi-2|dMi2|hip76|l(3)01058|l(3)76BDe|l(3)A154.3M3|l(3)L1243|l(3)S000606|l(3)S085401|l(3)j3D4|pha	Mi-2	protein-coding
791	chr2L	6046091	6046340	+	0	NA	promoter-TSS (NM_164676)	promoter-TSS (NM_164676)	-165	NM_164675	33847		NM_057864		ade2	153122_at|Ade2|CG9127|Dmel\CG9127|Paics|pym	adenosine 2	protein-coding
8374	chr3L	17529511	17530320	+	0	NA	promoter-TSS (NM_001144493)	promoter-TSS (NM_001144493)	-54	NM_140735	39957	Dm.2069	NM_140735		Edc3	CG6311|DmEDC3|Dmel\CG6311|EDC3|LSM16|LSm16	Enhancer of decapping 3	protein-coding
7578	chr3L	12266301	12266960	+	0	NA	promoter-TSS (NM_168495)	promoter-TSS (NM_168495)	211	NM_001259803	39399	Dm.5785	NM_140304		app	CG17144|CG42318|CG5620|CR32097|Dmel\CG42318|Dmel_CG17144|Dmel_CG5620	approximated	protein-coding
15667	chrX	16177301	16178210	+	0	NA	Intergenic	(TGT)n|Simple_repeat|Simple_repeat	13584	NR_047823	12797988		NR_047823		mir-985	CR42990|Dmel\CR42990|dme-mir-985|lincRNA.1008|miR-985	mir-985 stem loop	ncRNA
10408	chr3R	9215561	9216120	+	0	NA	intron (NM_001275474, intron 6 of 12)	intron (NM_001275474, intron 6 of 12)	11000	NM_169260	41094	Dm.1115	NM_079561		pum	CG9755|CG9763|Dmel\CG9755|EP(3)0883|PKL|PUM|Pum|anon-WO0172774.19|bem|fs(3)02003|l(3)01688|ova|ovt|pkl	pumilio	protein-coding
12988	chr3R	29559231	29560500	+	0	NA	intron (NM_057976, intron 1 of 1)	intron (NM_057976, intron 1 of 1)	3479	NM_057976	45285	Dm.1455	NM_057976		Dr	153515_at|99B|CG1897|Dmel\CG1897|Dr/msh|Msh|Msx|l(3)FA30|ltt|msh|msh-1|msh1	Drop	protein-coding
14580	chrX	7241911	7242830	+	0	NA	TTS (NM_001103430)	TTS (NM_001103430)	15915	NM_001103430	31660	Dm.20992	NM_132157		CG9650	Dmel\CG9650	CG9650	protein-coding
12775	chr3R	27607901	27608510	+	0	NA	promoter-TSS (NM_143314)	promoter-TSS (NM_143314)	-40	NM_001276086	43317	Dm.23046	NM_143316		Tusp	CG5586|DMG2-MB6.chr3R.24.043|Dmel\CG5586|TUSP	tusp	protein-coding
5276	chr2R	19445771	19447580	+	0	NA	promoter-TSS (NM_166354)	promoter-TSS (NM_166354)	-389	NM_079070	37237	Dm.2829	NM_079070		EloC	BcDNA:RH71704|CG9291|Dmel\CG9291|Elongin-C|ElonginC|dElongin C|l(2)SH1299|l(2)SH1520|l(2)SH2 1520	Elongin C	protein-coding
14458	chrX	6451211	6451480	+	0	NA	intron (NM_001272346, intron 8 of 8)	intron (NM_001272346, intron 8 of 8)	21033	NM_001031874	3772511		NM_001031874		CG33667	Dmel\CG33667	uncharacterized protein	protein-coding
11393	chr3R	16682171	16682430	+	0	NA	intron (NM_080500, intron 1 of 1)	intron (NM_080500, intron 1 of 1)	-26638	NM_080515	42032	Dm.13706	NM_080515		modSP	CG10100|CG17557|CG31217|CT28389|Dm-SP|Dmel\CG31217|LDL|Ldlr|ModSP|SP172|SP53|Ser89E|W|X	modular serine protease	protein-coding
236	chr2L	1525221	1525610	+	0	NA	Intergenic	Intergenic	2718	NM_058077	33336	Dm.4820	NM_058077		Or22b	22A.2|22b|AN12|CG4231|DOR22A.2|DOR22b|DOR67|Dmel\CG4231|Dor67|OR22b|Or22|Or22A.2|Or22a/b|Or67|dOr22b|dor67|or22b	Odorant receptor 22b	protein-coding
11011	chr3R	13946511	13947300	+	0	NA	Intergenic	Intergenic	-1093	NM_142065	41699	Dm.27290	NM_142065		Art6	CG9927|DART6|Dmel\CG9927	Arginine methyltransferase 6	protein-coding
12062	chr3R	21620261	21620670	+	0	NA	TTS (NM_169961)	TTS (NM_169961)	-1144	NM_001144621	42549	Dm.1271	NM_079712		InR	18402|CG18402|DIHR|DILR|DIR|DIRH|DIRbeta|DInR|DInr|Dir-a|Dir-b|Dmel\CG18402|INR|INS|IR|Inr|Inr-alpha|Inr-beta|InsR|dINR|dIR|dIRH|dInR|dInr|dInsR|dinr|dir|er10|inR|inr|insulin/insulin-like growth factor receptor|l(3)05545|l(3)93Dj|l(3)er10|lnR|sprout	Insulin-like receptor	protein-coding
4864	chr2R	16156621	16156890	+	0	NA	TTS (NM_137246)	TTS (NM_137246)	2039	NM_137246	36787	Dm.11766	NM_137246		CG10734	Dmel\CG10734	uncharacterized protein	protein-coding
5195	chr2R	18652321	18652680	+	0	NA	intron (NM_137511, intron 1 of 6)	intron (NM_137511, intron 1 of 6)	276	NM_166300	37147	Dm.3290	NM_137511		SP2637	BEST:GH24992|CG5473|Dmel\CG5473|dm-ntan1	SP2637	protein-coding
14126	chrX	3837411	3838540	+	0	NA	intron (NM_166992, intron 1 of 4)	intron (NM_166992, intron 1 of 4)	1895	NM_166992	31339	Dm.17730	NM_130722		ec	CG2904|Dmel\CG2904|EG:EG0002.3|Ec|Q1W9Q0	echinus	protein-coding
15210	chrX	12217341	12218050	+	0	NA	intron (NM_001258711, intron 2 of 16)	intron (NM_001258711, intron 2 of 16)	-12228	NM_001169258	32183	Dm.147	NM_078582		Ten-a	1.2|CG11270|CG12720|CG15733|CG18182|CG2578|CG2590|CG32659|CG42338|Dmel\CG42338|Dmel_CG12720|Dmel_CG15733|Dmel_CG32659|DmtenA|Dmtena|Ten11A|Ten[a]|cbd|ten-a|tenA|tenA(AT)[[14]]|ten[a]	Tenascin accessory	protein-coding
12022	chr3R	21470611	21471230	+	0	NA	Intergenic	Intergenic	5219	NR_048449	12798501		NR_048449		CR43453	Dmel\CR43453	ncRNA	ncRNA
16277	chrX	20666361	20666850	+	0	NA	intron (NM_167709, intron 1 of 2)	intron (NM_167709, intron 1 of 2)	-1723	NM_134560	33057	Dm.20658	NM_134560		CG1835	BcDNA:GH25431|Dmel\CG1835|anon-WO0140519.219	CG1835	protein-coding
131	chr2L	671431	672380	+	0	NA	intron (NM_001298622, intron 2 of 11)	intron (NM_001298622, intron 2 of 11)	-38663	NR_124007	19836079		NR_124007		CR44988	Dmel\CR44988	ncRNA	ncRNA
13909	chrX	2222431	2222710	+	0	NA	promoter-TSS (NM_057472)	promoter-TSS (NM_057472)	-3	NM_001297884	31201	Dm.32	NM_057472		Vinc	CG3299|CT11081|Dmel\CG3299|Dmvincp|EG:103B4.1|Vin|Vin2EF|vinc	Vinculin	protein-coding
12972	chr3R	29492991	29493760	+	0	NA	promoter-TSS (NM_143438)	promoter-TSS (NM_143438)	143	NM_143437	43473	Dm.6190	NM_143437		CG2310	Dmel\CG2310	CG2310	protein-coding
14825	chrX	8905371	8906170	+	0	NA	5' UTR (NM_001272436, exon 1 of 3)	5' UTR (NM_001272436, exon 1 of 3)	220	NM_001272436	43951	Dm.1878	NM_079923		e(r)	CG1871|Dmel\CG1871|ER|ER_DROME	enhancer of rudimentary	protein-coding
1515	chr2L	11220411	11220990	+	0	NA	intron (NM_057214, intron 2 of 8)	intron (NM_057214, intron 2 of 8)	8903	NM_001273449	34560	Dm.1729	NM_057214		ab	Ab|B2149|CG32830|CG43860|CG4807|Dmel\CG43860|Dmel_CG32830|Dmel_CG4807|clu|l(2)k02807|ptd	abrupt	protein-coding
16412	chrX	22441961	22442290	+	0	NA	Intergenic	Invader1_LTR|LTR|Gypsy	-2102	NM_001298593	33128	Dm.17217	NM_134614		CG14621	Dmel\CG14621|Slc35e1|lincRNA.1043	uncharacterized protein	protein-coding
14917	chrX	9657791	9659150	+	0	NA	TTS (NM_132349)	TTS (NM_132349)	675	NM_001014728	31907	Dm.20620	NM_132348		Ptpmeg2	CG3101|CG3102|CG32697|Dmel\CG32697|L(1)G0232|MEG2|PTP-Meg2|dMeg2|l(1)G0232|lG0232	Protein tyrosine phosphatase Meg2	protein-coding
5488	chr2R	21033851	21034150	+	0	NA	Intergenic	Intergenic	-3959	NR_124672	19835769		NR_124672		CR45148	Dmel\CR45148|lincRNA.368	ncRNA	ncRNA
2440	chr2L	19218121	19218910	+	0	NA	TTS (NR_073804)	TTS (NR_073804)	1108	NR_073804	14462801		NR_073804		CR44189	Dmel\CR44189|lincRNA.197	ncRNA	ncRNA
14482	chrX	6677821	6679790	+	0	NA	promoter-TSS (NM_001031877)	promoter-TSS (NM_001031877)	313	NM_132110	31604	Dm.11606	NM_132110		ND-ASHI	CG3192|Dmel\CG3192|NIAM	NADH dehydrogenase (ubiquinone) ASHI subunit	protein-coding
3006	chr2R	1211041	1211590	+	0	NA	Intergenic	BATUMI_I-int|LTR|Pao	-52825	NM_001015176	3354930	Dm.7153	NM_001015174		CG40191	BEST:HL02313|BcDNA:LD12604|Dmel\CG40191	uncharacterized protein	protein-coding
13845	chrX	1861441	1862170	+	0	NA	promoter-TSS (NM_001169171)	promoter-TSS (NM_001169171)	-15	NM_143755	45250	Dm.6542	NM_143755		deltaCOP	63B12S|ARCN1|Arch|CG14813|DM63B12S|Delta COP|DeltaCop|Dmel\CG14813|EG:63B12.10|ESTS:63B12S|anon-WO03040301.246|delta-Cop|deltaCop|l(1)G0051|l(1)G0301|l(1)G0450	Coat Protein (coatomer) delta	protein-coding
10273	chr3R	8356691	8357710	+	0	NA	promoter-TSS (NM_169220)	promoter-TSS (NM_169220)	-131	NM_169220	40999	Dm.2466	NM_079554		stck	CG7954|D-PINCH|Dmel\CG7954|PINCH|Pinch|dPINCH|dpin|pin85A|pinch|stk	steamer duck	protein-coding
9709	chr3R	4642481	4642900	+	0	NA	promoter-TSS (NM_001275328)	promoter-TSS (NM_001275328)	727	NM_001275329	40577	Dm.1060	NM_141226		MED31	BcDNA:GM28912|CG1057|Dmel\CG1057|Med31|Trap18|dSOH1|dTRAP18|med31|p36	Mediator complex subunit 31	protein-coding
5131	chr2R	18242181	18242570	+	0	NA	Intergenic	Intergenic	4388	NR_124615	19834828		NR_124615		CR44420	Dmel\CR44420	ncRNA	ncRNA
10998	chr3R	13893021	13893920	+	0	NA	Intergenic	Intergenic	-8383	NM_169560	41697	Dm.1755	NM_169560		ems	CG2988|Dmel\CG2988|E4|EMS|Ems|W13|ant	empty spiracles	protein-coding
5666	chr2R	22400601	22401140	+	0	NA	intron (NM_001299790, intron 1 of 2)	intron (NM_001299790, intron 1 of 2)	1189	NM_137823	37557	Dm.4607	NM_137823		babos	CG3624|CT12183|Dmel\CG3624	babos	protein-coding
14691	chrX	8047211	8047650	+	0	NA	3' UTR (NM_001272394, exon 7 of 7)	3' UTR (NM_001272394, exon 7 of 7)	8707	NM_001272392	31722	Dm.7909	NM_078523		fs(1)h	CG2252|Dmel\CG2252|FSH|Fs(1)h|Fs(1)h-L|Fs(1)hL|Fs(1)hS|Fsh|N72|ORE-1|anon-EST:Liang-1.81|anon-EST:fe1G2|clone 1.81|fs(1)1456|fs(1)26/26A|fs(1)M16|fs(1)R10.4|fsh|fst(1)h|l(1)7Da|l(1)G0093|l(1)G0495|rnc	female sterile (1) homeotic	protein-coding
4840	chr2R	15992271	15992690	+	0	NA	promoter-TSS (NM_137228)	promoter-TSS (NM_137228)	72	NM_137228	36759	Dm.30925	NM_137228		CG8320	Dmel\CG8320	CG8320	protein-coding
8037	chr3L	15295441	15295800	+	0	NA	Intergenic	Intergenic	-3338	NM_001104139	39660	Dm.27147	NM_001104139		Best4	CG7259|CT22395|Dmel\CG7259|dBest4|dbest4	Bestrophin 4	protein-coding
14478	chrX	6661411	6661970	+	0	NA	promoter-TSS (NM_132108)	promoter-TSS (NM_132108)	43	NM_001258622	31601	Dm.20559	NM_132108		Ctr1A	BcDNA:RH42635|CG3977|DmCtr1A|Dmel\CG3977|ctr1A	Copper transporter 1A	protein-coding
5684	chr2R	22512811	22513210	+	0	NA	5' UTR (NM_001274206, exon 1 of 3)	5' UTR (NM_001274206, exon 1 of 3)	1089	NM_001274206	37573	Dm.3051	NM_166535		px	CG4444|Dmel\CG4444|l(2)k08134|l(2)k08316	plexus	protein-coding
1504	chr2L	11145361	11145620	+	0	NA	promoter-TSS (NM_164958)	promoter-TSS (NM_164958)	-73	NM_001298906	261614	Dm.33484	NM_164958		CG31867	BcDNA:AT02643|CG6275|Dmel\CG31867	uncharacterized protein	protein-coding
6659	chr3L	4160621	4161220	+	0	NA	promoter-TSS (NM_001014557)	promoter-TSS (NM_001014557)	12	NM_001274478	3346237	Dm.23635	NM_001014557		nab	CG15000|CG15001|CG33545|Dmel\CG33545|NAB|Nab|dNAB|dnab|l(2)SH3 143|l(3)64Aj|l(3)SH143|l(3)SH21	nab	protein-coding
776	chr2L	5961421	5961810	+	0	NA	Intergenic	CpG	-1275	NM_057435	33829	Dm.27652	NM_057435		Vm26Aa	CG9048|Dmel\CG9048|TU-2|VM26A.1|VM26Aa|Vm26A|Vm26A.1|Vm26A1|sV17	Vitelline membrane 26Aa	protein-coding
12649	chr3R	26052191	26053140	+	0	NA	promoter-TSS (NM_206576)	promoter-TSS (NM_206576)	-156	NM_143198	43164	Dm.10330	NM_143198		Vps2	CG14542|Did4|DmVPS2|Dmel\CG14542|Dvps2|NEST:bs02f06|dvps2|vps2	Vacuolar protein sorting 2	protein-coding
5908	chr2R	24068371	24069320	+	0	NA	promoter-TSS (NM_001043103)	promoter-TSS (NM_001043103)	88	NM_001299890	37852	Dm.4444	NM_138036		CG3209	Dmel\CG3209|GPAT4|dGPAT4	CG3209	protein-coding
5553	chr2R	21493531	21493800	+	0	NA	intron (NM_001259519, intron 2 of 4)	intron (NM_001259519, intron 2 of 4)	1859	NM_001299751	37449		NM_057625		Fkbp14	BcDNA.GM07659|BcDNA:GH08925|BcDNA:GM07659|CG9847|Dmel\CG9847|FKB13|FKBP13|FKBP14|Fkbp13|GM07659|fkbp13|l(2)00734	FK506-binding protein 14	protein-coding
4332	chr2R	12457231	12457540	+	0	NA	intron (NM_078989, intron 1 of 1)	intron (NM_078989, intron 1 of 1)	4195	NM_078989	36363	Dm.4470	NM_078989		Lac	CG12369|CT24921|Dmel\CG12369|bulb|l(2)k11012|l(2)k11012b|lac	Lachesin	protein-coding
10030	chr3R	6773771	6774470	+	0	NA	intron (NR_037752, intron 1 of 2)	intron (NR_037752, intron 1 of 2)	-2213	NR_048333	12798041	Dm.39410	NR_048333		mir-993	CR42881|Dmel\CR42881|dme-miR-993|dme-mir-993|miR-993	mir-993 stem loop	ncRNA
5550	chr2R	21480251	21481670	+	0	NA	promoter-TSS (NM_079990)	promoter-TSS (NM_079990)	216	NM_057617	37447	Dm.721	NM_057617		Sdc	CG10497|CT27296|Dmel\CG10497|Dsyn|Syd|Syn|dSdc|l(2)10608|sdc|syd|syn	Syndecan	protein-coding
8231	chr3L	16528461	16528720	+	0	NA	intron (NM_168670, intron 4 of 30)	intron (NM_168670, intron 4 of 30)	14780	NM_168670	39835		NM_168670		CG43373	AC|Ago2|CG12436|CG32158|CG42513|Dmel\CG43373|Dmel_CG12436|Dmel_CG32158|Dmel_CG42513	uncharacterized protein	protein-coding
8773	chr3L	20643991	20644910	+	0	NA	Intergenic	CpG	7251	NM_140989	40286	Dm.27188	NM_140989		CG13251	Dmel\CG13251	uncharacterized protein	protein-coding
4943	chr2R	16783261	16784030	+	0	NA	promoter-TSS (NM_166196)	promoter-TSS (NM_166196)	-26	NM_166193	36881	Dm.6392	NM_137314		CG5522	Dmel\CG5522|RalGPS|RasGPS	CG5522	protein-coding
6916	chr3L	6746901	6747770	+	0	NA	promoter-TSS (NM_001300027)	promoter-TSS (NM_001300027)	-80	NM_001300027	38748	Dm.21367	NM_139799		velo	CG10107|Dmel\CG10107	veloren	protein-coding
68	chr2L	305601	306270	+	0	NA	promoter-TSS (NM_001272889)	promoter-TSS (NM_001272889)	0	NM_205884	33204	Dm.4674	NM_057503		Plc21C	CG4574|Dmel\CG4574|PLC|PLC-21|PLC-21C|PLC21C|PLC21c|PLC[[Beta]]|Plc21|Plcbeta21C|plc-21|plc21|plc21C|plc21c|plcbeta21c	Phospholipase C at 21C	protein-coding
7395	chr3L	10944771	10945040	+	0	NA	Intergenic	Intergenic	-14326	NR_124864	19834970		NR_124864		CR45248	Dmel\CR45248	ncRNA	ncRNA
12092	chr3R	21792881	21793630	+	0	NA	intron (NM_001275882, intron 8 of 17)	intron (NM_001275882, intron 8 of 17)	5076	NR_048455	12798506	Dm.38686	NR_048455		mir-999	CR43038|Dmel\CR43038|dme-miR-999|dme-mir-999|miR-999|miR999	mir-999 stem loop	ncRNA
10257	chr3R	8301001	8301790	+	0	NA	promoter-TSS (NM_141524)	promoter-TSS (NM_141524)	-45	NM_079551	40980	Dm.2468	NM_079551		mRpL1	CG7494|Dmel\CG7494|L1	mitochondrial ribosomal protein L1	protein-coding
5171	chr2R	18450741	18451330	+	0	NA	promoter-TSS (NM_137491)	promoter-TSS (NM_137491)	6	NM_079059	37123	Dm.1432	NM_079059		Prp19	BcDNA:LD02793|CG5519|Dmel\CG5519|EC2-11|GPB|Gbp|PRP19|l(2)07838|prp19	Pre-RNA processing factor 19	protein-coding
12923	chr3R	29122721	29123620	+	0	NA	promoter-TSS (NM_170390)	promoter-TSS (NM_170390)	-200	NM_143413	43440	Dm.10965	NM_143413		CG11880	Dmel\CG11880	uncharacterized protein	protein-coding
4916	chr2R	16518911	16519500	+	0	NA	intron (NM_058159, intron 2 of 14)	intron (NM_058159, intron 2 of 14)	2751	NM_206134	36846	Dm.14046	NM_058159		Sema2a	112/40|BcDNA:LD09561|CG4700|CT14922|D-Sema II|D-Sema-II|D-Sema2a|D-SemaII|D-semaII|Dmel\CG4700|Dsema-II|Sema-2a|SemaII|dSema-II|l(2)03021|sema 2a|sema II|sema-2a|sema-II|sema2a|semaII	Semaphorin 2a	protein-coding
11802	chr3R	19844731	19845090	+	0	NA	Intergenic	Intergenic	-2401	NM_001170186	42357	Dm.4171	NM_142576		CG4662	Dmel\CG4662	CG4662	protein-coding
7591	chr3L	12427011	12427350	+	0	NA	intron (NM_001274833, intron 2 of 5)	intron (NM_001274833, intron 2 of 5)	5488	NM_001274833	39418	Dm.941	NM_079317		toe	CG10704|Dmel\CG10704|Toe|anon-WO0172774.89	twin of eyg	protein-coding
3453	chr2R	6632141	6632700	+	0	NA	promoter-TSS (NM_165476)	promoter-TSS (NM_165476)	-36	NM_165474	44307	Dm.6911	NM_057453		Vha16-1	ATP6V0C|BcDNA:SD02875|CG3161|Dmel\CG3161|DucC|EP2372|MRE15|V-ATPase|Vha1|Vha16|Vhac|vha16|vha16-1	Vacuolar H[+] ATPase 16kD subunit 1	protein-coding
10389	chr3R	9026111	9026500	+	0	NA	intron (NM_169255, intron 1 of 2)	CpG	4098	NR_048350	12798072		NR_048348		CR31429	BcDNA:AT27571|Dmel\CR31429|NEST:bs10g06	ncRNA	ncRNA
2822	chr2L	21794941	21795240	+	0	NA	intron (NM_165400, intron 1 of 3)	intron (NM_165400, intron 1 of 3)	357	NM_165400	35427	Dm.4930	NM_165400		CG31612	CG11631|CG11632|Dmel\CG31612	uncharacterized protein	protein-coding
7585	chr3L	12320781	12321420	+	0	NA	Intergenic	(GT)n|Simple_repeat|Simple_repeat	-8132	NM_001274825	39406	Dm.15353	NM_168497		Lmx1a	CG10432|CG17615|CG32105|Dmel\CG32105|dLmx1a	LIM homeobox transcription factor 1 alpha	protein-coding
915	chr2L	6833591	6834170	+	0	NA	intron (NM_001298763, intron 4 of 4)	intron (NM_001298763, intron 4 of 4)	11563	NM_164716	33957	Dm.18267	NM_164716		sens-2	CG11243|CG17373|CG31632|D.m Sens-2|Dmel\CG31632|Sens-2|sens2	senseless-2	protein-coding
3328	chr2R	5723591	5723870	+	0	NA	intron (NM_165445, intron 1 of 7)	intron (NM_165445, intron 1 of 7)	3102	NM_165445	35509	Dm.4746	NM_078897		ap	AP|Ap|Apt|CG8376|Dmel\CG8376|LIM|S-2a|Xa|blt|neuro|trw	apterous	protein-coding
3269	chr2R	5211521	5211810	+	0	NA	intron (NM_001316406, intron 6 of 19)	intron (NM_001316406, intron 6 of 19)	39357	NM_001103722	35483	Dm.12140	NM_001103722		Nipped-A	41Ah|CG10549|CG2905|CG33554|Dmel\CG33554|GroupV|Nip-A|NipA|Nipped A|Nipped[A]|TRA1|TRRAP|Tra-1|Tra1|dTRRAP|dTra1|dmTRRAP|l(2)41Ah|l(2)C123|l(2)EMS34-12|tra1	Nipped-A	protein-coding
3120	chr2R	3061991	3062680	+	0	NA	Intergenic	PROTOP_B|DNA|P	-4164	NM_001170367	8674044	Dm.30450	NM_001170367		dpr21	CG42596|Dmel\CG42596|Dpr21	defective proboscis extension response 21	protein-coding
12763	chr3R	27446421	27446980	+	0	NA	Intergenic	Intergenic	-5756	NM_001300632	19835591		NM_001300632		CG44290	Dmel\CG44290|lincRNA.869	uncharacterized protein	protein-coding
9214	chr3L	24437861	24438120	+	0	NA	Intergenic	Intergenic	-99246	NM_001043187	3355089	Dm.1580	NM_001043186		mRpS5	BcDNA:RE47909|CG40049|Dmel\CG40049|MRP-S5|MrpS5	mitochondrial ribosomal protein S5	protein-coding
7462	chr3L	11414471	11415650	+	0	NA	Intergenic	CpG	9525	NR_124890	19834955		NR_124890		CR44363	Dmel\CR44363	ncRNA	ncRNA
11912	chr3R	20797671	20798640	+	0	NA	intron (NM_001275847, intron 10 of 12)	intron (NM_001275847, intron 10 of 12)	8169	NM_169925	42460	Dm.11889	NM_142656		Syp	AI945337|CG17838|Dmel\CG17838|anon-WO0118547.613|cg17838|l(3)03806|syp	Syncrip	protein-coding
16206	chrX	19897381	19898420	+	0	NA	intron (NM_001258845, intron 1 of 5)	intron (NM_001258845, intron 1 of 5)	4071	NM_001258845	33000	Dm.31021	NM_134516		Hers	CG11936|CG15619|CG32529|Dmel\CG32529|HERS	Histone gene-specific Epigenetic Repressor in late S phase	protein-coding
6828	chr3L	5893091	5893680	+	0	NA	Intergenic	CpG	4050	NM_139738	38661	Dm.858	NM_139738		DNApol-epsilon58	10489|CG10489|DNApol-epsilon|Dmel\CG10489|POLE2|Pole2|dpolepsilonp58	DNA polymerase epsilon 58kD subunit	protein-coding
13228	chr3R	31305791	31306430	+	0	NA	promoter-TSS (NM_001316541)	promoter-TSS (NM_001316541)	-726	NM_143604	43703	Dm.16267	NM_143604		CG11340	CT5896|Dmel\CG11340|Lcch-100C|lincRNA.914	uncharacterized protein	protein-coding
1477	chr2L	10974901	10975370	+	0	NA	TTS (NM_001042889)	TTS (NM_001042889)	158	NM_080045	44793		NM_080045		abo	Abo|CG6093|Dmel\CG6093	abnormal oocyte	protein-coding
927	chr2L	6923561	6924700	+	0	NA	exon (NM_001169427, exon 3 of 4)	exon (NM_001169427, exon 3 of 4)	2491	NM_001169427	33968	Dm.1997	NM_057521		Hrb27C	10280|CG10377|Dmel\CG10377|HRB27C|HRP48|Hrb27-C|Hrb27c|Hrb48|Hrp48|Hrp48/Hrb27C|Ov5|RRM7|Rbp7|hnRNP27C|hnRNP48|hrb27|hrb27C|hrb27c|hrp48|l(2)02647|l(2)10280|l(2)2647|linha|p50|rrm7	Heterogeneous nuclear ribonucleoprotein at 27C	protein-coding
1344	chr2L	10056791	10059700	+	0	NA	exon (NM_057693, exon 4 of 5)	exon (NM_057693, exon 4 of 5)	1345	NM_057693	34338	Dm.3560	NM_057693		Pen	2.1|CG4799|DPend|Dalpha2|Dimp-alpha2|Dmel\CG4799|IMPalpha2|Imp-alpha2|Kap alpha2|Kap-alpha2|Kpna2|OHO31|Oho31|Rch1|alpha2|alpha2A-Kap|alphaKap2|anon-WO0140519.258|bs29g06.y1|imp alpha2|imp-alpha2|impalpha2|importin alpha2/pendulin|l(2)144/1|l(2)k06324|l(2)k14401|oho-31|oho31|pen|pen-2	Pendulin	protein-coding
6959	chr3L	7033081	7033570	+	0	NA	intron (NM_001169889, intron 2 of 5)	intron (NM_001169889, intron 2 of 5)	5022	NR_133181	26067160		NR_133181		CR45832	Dmel\CR45832	ncRNA	ncRNA
8564	chr3L	19031671	19034130	+	0	NA	TTS (NR_133275)	TTS (NR_133275)	1000	NR_133275	26067267		NR_133275		CR45940	Dmel\CR45940	ncRNA	ncRNA
15347	chrX	13296181	13297350	+	0	NA	promoter-TSS (NM_001272583)	promoter-TSS (NM_001272583)	-114	NM_132643	32281	Dm.3777	NM_132643		CG1764	Dmel\CG1764|cg1764	CG1764	protein-coding
4526	chr2R	13725421	13725730	+	0	NA	exon (NM_079007, exon 10 of 13)	exon (NM_079007, exon 10 of 13)	-28389	NM_137054	36522	Dm.23919	NM_137054		CG6280	Dmel\CG6280	CG6280	protein-coding
806	chr2L	6130591	6131000	+	0	NA	promoter-TSS (NM_135155)	promoter-TSS (NM_135155)	-144	NM_135154	33866	Dm.13488	NM_135154		tectonic	CG42731|CG9227|Dmel\CG42731|Dmel_CG9227|Tectonic	tectonic	protein-coding
7763	chr3L	13499931	13500370	+	0	NA	intron (NM_168555, intron 1 of 2)	intron (NM_168555, intron 1 of 2)	-2557	NM_140402	39522	Dm.18611	NM_140402		Spt20	CG17689|Dmel\CG17689|lincRNA.S5070	Spt20	protein-coding
14392	chrX	5967071	5967490	+	0	NA	intron (NM_001297991, intron 2 of 10)	intron (NM_001297991, intron 2 of 10)	817	NM_001297992	50391	Dm.5496	NM_132057		Grip	CG14447|CG5980|DGrip|Dgrip|Dmel\CG14447|GRIP|dGRIP|dgrip|grip	Glutamate receptor binding protein	protein-coding
11934	chr3R	21022981	21023600	+	0	NA	5' UTR (NM_143973, exon 1 of 3)	5' UTR (NM_143973, exon 1 of 3)	873	NM_143973	50050	Dm.3976	NM_143973		CG17278	BcDNA:SD04019|Dmel\CG17278	uncharacterized protein	protein-coding
375	chr2L	2908951	2909300	+	0	NA	intron (NM_001347818, intron 2 of 10)	intron (NM_001347818, intron 2 of 10)	18954	NM_001144303	33496	Dm.2778	NM_078740		lilli	154454_at|189Y|AFF4|BEST:GH09955|BcDNA:GM02019|CG8817|Dmel\CG8817|Lilli|S(ls)4|SS2-1|SY2-1|Su(Raf)2A|Su(Raf)2a|dAFF4|l(2)00632|l(2)23Cc|l(2)K00632|l(2)K07920|l(2)k07920|l(2)k16124	lilliputian	protein-coding
8810	chr3L	21001741	21002440	+	0	NA	exon (NM_168880, exon 9 of 14)	exon (NM_168880, exon 9 of 14)	-1617	NR_133286	26067271		NR_133286		CR45944	Dmel\CR45944	ncRNA	ncRNA
7355	chr3L	10659901	10661810	+	0	NA	promoter-TSS (NM_168416)	promoter-TSS (NM_168416)	158	NM_168417	39206	Dm.21249	NM_168416		CG32066	CG6487|CG6491|Dmel\CG32066	uncharacterized protein	protein-coding
15318	chrX	13143441	13143710	+	0	NA	intron (NM_167349, intron 1 of 5)	(TC)n|Simple_repeat|Simple_repeat	4376	NM_167349	32264		NM_167349		CG32645	CG15716|CG4331|Dmel\CG32645	uncharacterized protein	protein-coding
858	chr2L	6488781	6489370	+	0	NA	promoter-TSS (NM_135193)	promoter-TSS (NM_135193)	-15	NM_135193	33908	Dm.3125	NM_135193		epsilonCOP	BcDNA:LD29885|CG9543|Dmel\CG9543|bcDNA:LD29885|epsilon-COP|epsilon-Cop	Coat Protein (coatomer) epsilon	protein-coding
10250	chr3R	8276761	8278390	+	0	NA	promoter-TSS (NM_169213)	promoter-TSS (NM_169213)	-477	NM_169213	40975		NM_169213		ato	ATO|At|Ato|CG7508|Dmel\CG7508|ato1|ato[Dm]|bHLHa10	atonal	protein-coding
16071	chrX	19028421	19029050	+	0	NA	TTS (NM_001272769)	TTS (NM_001272769)	-21707	NM_001103558	50358		NM_001103558		Diedel3	CG14189|CG34329|Diedel-3|Dmel\CG34329	Diedel 3	protein-coding
3569	chr2R	7445641	7445940	+	0	NA	promoter-TSS (NM_001144141)	promoter-TSS (NM_001144141)	2	NM_136434	35667	Dm.6833	NM_136434		kappaB-Ras	B7YZS7|BcDNA:RH38596|CG1669|Dmel\CG1669|Q9V4L4-1|dkappaB-Ras	kappaB-Ras	protein-coding
5037	chr2R	17665331	17666090	+	0	NA	promoter-TSS (NM_137398)	promoter-TSS (NM_137398)	32	NM_001299616	37005	Dm.7296	NM_137398		eIF3-S8	CG4954|Dmel\CG4954|eIF3-s8|eIF3c	eIF3-S8	protein-coding
3292	chr2R	5359621	5360510	+	0	NA	TTS (NM_165430)	TTS (NM_165430)	3039	NM_165430	35492	Dm.490	NM_136325		CG10417	Dmel\CG10417|PP2Cg	uncharacterized protein	protein-coding
7178	chr3L	9018681	9019780	+	0	NA	promoter-TSS (NM_140025)	promoter-TSS (NM_140025)	16	NM_140025	39038	Dm.5197	NM_140025		Doc2	CG5187|Dm-DOC2|Dmel\CG5187|Doc|doc2	Dorsocross2	protein-coding
13029	chr3R	29802601	29803650	+	0	NA	promoter-TSS (NM_170428)	promoter-TSS (NM_170428)	-71	NM_143471	43516	Dm.12968	NM_143471		CG7789	Dmel\CG7789	CG7789	protein-coding
14033	chrX	3022431	3023150	+	0	NA	intron (NM_001258578, intron 6 of 10)	intron (NM_001258578, intron 6 of 10)	33739	NM_001272267	31292	Dm.4017	NM_080320		kirre	CG3653|CT12279|DUF|DUF/KIRRE|Dmel\CG3653|Duf|Duf/Kirre|EG:163A10.1|Kirre|RH09239|duf|duf/kirre	kin of irre	protein-coding
11315	chr3R	16263981	16264340	+	0	NA	promoter-TSS (NM_079655)	promoter-TSS (NM_079655)	-45	NM_001260206	53565	Dm.1727	NM_080257		bor	ATAD3A|Bor|CG6815|CP89BC|Dmel\CG6815|dATAD3A	belphegor	protein-coding
3724	chr2R	8579441	8580120	+	0	NA	intron (NM_001299271, intron 6 of 12)	(TGGCATA)n|Simple_repeat|Simple_repeat	-1289	NM_136547	35838		NM_136547		CG42326	CG14747|CG14748|Dmel\CG42326|Dmel_CG14747|Dmel_CG14748	uncharacterized protein	protein-coding
13474	chr4	650381	650850	+	0	NA	exon (NM_001014691, exon 10 of 10)	exon (NM_001014691, exon 10 of 10)	-4059	NM_143674	43806	Dm.14094	NM_143674		Ekar	CG9935|CT36399|DmelCG9935|Dmel\CG9935|ekar	Eye-enriched kainate receptor	protein-coding
10733	chr3R	11618391	11620270	+	0	NA	promoter-TSS (NM_141835)	promoter-TSS (NM_141835)	576	NM_169406	41392	Dm.20930	NM_169404		Jupiter	BEST:LP05168|BcDNA:GH06373|BcDNA:LD21358|BcDNA:LD43690|BcDNA:RH53211|CG17238|CG18762|CG18763|CG31363|Dmel\CG31363|anon-EST:Liang-1.76|anon-WO0140519.173|clone 1.76|jupiter	jupiter	protein-coding
15253	chrX	12649471	12649890	+	0	NA	intron (NM_167330, intron 14 of 22)	intron (NM_167330, intron 14 of 22)	-3946	NM_001298234	32221	Dm.2166	NM_078585		CkIalpha	CG2028|CK I|CK1|CK1a|CK1alpha|CKI|CKI alpha|CKIa|CKIalpha|Ck1alpha|CkI alpha|CkIa|Dmel\CG2028|PKA-C|anon-WO03040301.93|anon-WO03040301.95|ck1a|ck1alpha|dmCK1|dmckI|l(1)G0492	Casein kinase Ialpha	protein-coding
6308	chr3L	1480831	1481090	+	0	NA	intron (NM_176272, intron 5 of 7)	intron (NM_176272, intron 5 of 7)	-2019	NM_176273	38169	Dm.3465	NM_176272		stet	B-Rho|Brho|CG12083|CG12504|CG33166|Dmel\CG33166|Rho-2|Rho2|brho|rho-2|rho2	stem cell tumor	protein-coding
5174	chr2R	18510931	18511590	+	0	NA	Intergenic	Intergenic	-3314	NM_137496	37129	Dm.13273	NM_137496		CG43066	CG42510|CG5226|Dmel\CG43066|Dmel_CG42510|Dmel_CG5226|anon-WO0149848.1	uncharacterized protein	protein-coding
2434	chr2L	19189991	19190610	+	0	NA	promoter-TSS (NM_001273637)	promoter-TSS (NM_001273637)	-42	NM_001273637	44355	Dm.4108	NM_057791		drl	CG10758|CG17348|DRL|Dmel\CG17348|Drl|lin|lio|lio/drl	derailed	protein-coding
3691	chr2R	8164161	8165170	+	0	NA	promoter-TSS (NM_165595)	promoter-TSS (NM_165595)	5	NM_165595	246573		NM_165595		CG30373	BcDNA:RH67738|Dmel\CG30373	uncharacterized protein	protein-coding
15685	chrX	16275771	16276470	+	0	NA	promoter-TSS (NM_167488)	promoter-TSS (NM_167488)	60	NM_078639	32581	Dm.2793	NM_078639		kat80	CG13956|CG9910|Dmel\CG13956|Kat80|Katanin80	katanin 80	protein-coding
10340	chr3R	8831641	8831950	+	0	NA	intron (NM_001260069, intron 12 of 13)	intron (NM_001260069, intron 12 of 13)	7384	NM_206463	41060	Dm.2106	NM_141584		CG8379	Dmel\CG8379|anon-WO0118547.250	CG8379	protein-coding
5144	chr2R	18305481	18306290	+	0	NA	intron (NM_206161, intron 1 of 3)	intron (NM_206161, intron 1 of 3)	-1908	NM_001043093	37098	Dm.33482	NM_001043093		CG14505	Dmel\CG14505	uncharacterized protein	protein-coding
4436	chr2R	13022601	13023310	+	0	NA	Intergenic	Intergenic	24301	NM_001299441	36433	Dm.24504	NM_136988		CG13323	Dmel\CG13323|FBgn0033788	uncharacterized protein	protein-coding
16008	chrX	18645041	18645540	+	0	NA	intron (NM_001298482, intron 1 of 6)	intron (NM_001298482, intron 1 of 6)	2277	NM_001298483	32850	Dm.208	NM_133085		Rip11	CG6606|Dmel\CG6606|dRip11|l(1)G0003|l(1)G0070|l(1)G0092|l(1)G0205|l(1)G0297|l(1)G0434	Rab11 interacting protein	protein-coding
7448	chr3L	11260071	11262350	+	0	NA	Intergenic	Intergenic	8903	NM_140199	39270	Dm.6574	NM_140199		scyl	7590|CG7590|Dmel\CG7590|anon-WO0118547.215|scy	scylla	protein-coding
4536	chr2R	13822621	13823260	+	0	NA	intron (NM_001259377, intron 1 of 4)	intron (NM_001259377, intron 1 of 4)	1613	NM_166010	36527	Dm.1511	NM_079008		fl(2)d	CG6315|Dmel\CG6315|v(2)k16105	female lethal d	protein-coding
4238	chr2R	11788381	11788860	+	0	NA	exon (NM_136856, exon 1 of 1)	exon (NM_136856, exon 1 of 1)	873	NM_136856	36257	Dm.27746	NM_136856		Ir48c	CG12444|DmelIR48c|Dmel\CG12444|IR48c|TANGO3|Tango3	Ionotropic receptor 48c	protein-coding
11094	chr3R	14586791	14587640	+	0	NA	intron (NM_001104322, intron 2 of 6)	intron (NM_001104322, intron 2 of 6)	-4405	NM_169588	41770	Dm.1198	NM_169588		stumps	0837/10|C|CG18485|CG31317|CG3375|DOF|Dmel\CG31317|Dof|Dof/stumps/heartbroken|Hbr|Hbr/Dof|P1740|anon-EST:CL47|anon-estC|dof|dof/hbr|dof/hbr/sms|dof1|gene C|hbr|heartbroken/dof|i21|i28|l(3)09904|l(3)S083710|sms|stumps/dof	stumps	protein-coding
10474	chr3R	9604571	9604820	+	0	NA	intron (NM_001275499, intron 1 of 3)	intron (NM_001275499, intron 1 of 3)	12766	NM_001275499	41163	Dm.11523	NM_141661		CG8312	Dmel\CG8312	CG8312	protein-coding
6582	chr3L	3624781	3625370	+	0	NA	Intergenic	Intergenic	-1277	NM_001104023	38436	Dm.27049	NM_001104023		dar1	CG12029|Dar1|Dmel\CG12029|l(3)63Ed|l(3)SH5	dendritic arbor reduction 1	protein-coding
106	chr2L	540451	541410	+	0	NA	TTS (NM_001272899)	TTS (NM_001272899)	1650	NM_164385	33226	Dm.3336	NM_057630		lwr	CG3018|DUbc9|DmUbc9|Dmel\CG3018|Dmubc9|FBgn0010602|Iwr|Lwr|UBC9|Ubc 9|Ubc-9|Ubc9|UbcD9|dUBC9|dUbc9|dip4|hbl|i105|i56|l(2)01519|l(2)02858|l(2)05486|l(2)05487|semi|ubc9	lesswright	protein-coding
468	chr2L	3662461	3662810	+	0	NA	promoter-TSS (NM_001103605)	promoter-TSS (NM_001103605)	-110	NM_001298663	5740176	Dm.12203	NM_001103605		Drgx	CG10017|CG2808|CG34340|Dmel\CG34340|Dmel_CG10017|Dmel_CG2808	Dorsal root ganglia homeobox	protein-coding
12671	chr3R	26472521	26472860	+	0	NA	3' UTR (NM_001170273, exon 11 of 11)	3' UTR (NM_001170273, exon 11 of 11)	7150	NM_170273	43196	Dm.1344	NM_143224		CG5455	CT17296|Dmel\CG5455	CG5455	protein-coding
2806	chr2L	21674971	21675250	+	0	NA	intron (NM_206020, intron 1 of 11)	FB4_DM|DNA|TcMar-Tc1	1117	NM_165393	35421	Dm.11759	NM_136274		CG2225	Dmel\CG2225	CG2225	protein-coding
5465	chr2R	20937341	20937620	+	0	NA	TTS (NM_166413)	TTS (NM_166413)	-6541	NM_079076	37368	Dm.36749	NM_079076		Act57B	Act57|Act57A|Act57b|Actin|ArpE|BEST:RE38067|C|CG10067|CG30294|Dmel\CG10067|M|T10|act 57A|act57A|act57B|act57b|actin|anon-EST:CL2c12|chr2R:16452771..16452966	Actin 57B	protein-coding
3901	chr2R	9761091	9761340	+	0	NA	intron (NM_057547, intron 4 of 13)	intron (NM_057547, intron 4 of 13)	-3147	NM_136671	36004	Dm.5055	NM_136671		CG1690	Dmel\CG1690	CG1690	protein-coding
12030	chr3R	21500811	21501100	+	0	NA	intron (NM_057525, intron 1 of 3)	intron (NM_057525, intron 1 of 3)	969	NM_057525	42544	Dm.2657	NM_057525		C15	311|93Bal|CG7937|Cll|Dmel\CG7937|Ect5|Hox11-311|c15|cll	C15	protein-coding
12732	chr3R	27201401	27201750	+	0	NA	Intergenic	Intergenic	-7308	NM_001300629	43275		NM_079803		Ser	Bd|CG6127|CT18858|Dmel\CG6127|Rpw|SER|mel(3)8|ser|std	Serrate	protein-coding
10719	chr3R	11481181	11481960	+	0	NA	Intergenic	Intergenic	-5218	NR_125143	19835351		NR_125143		CR45581	Dmel\CR45581	ncRNA	ncRNA
9207	chr3L	24298141	24298440	+	0	NA	3' UTR (NM_001043177, exon 8 of 8)	3' UTR (NM_001043177, exon 8 of 8)	-7426	NR_125058	19835308		NR_125058		CR45159	Dmel\CR45159	ncRNA	ncRNA
695	chr2L	5327121	5327560	+	0	NA	promoter-TSS (NM_001103618)	promoter-TSS (NM_001103618)	51	NM_001258956	46040	Dm.13877	NM_080526		cype	BcDNA:GH04604|CG14028|CG18323|COX6C|COXH|COXVIc|Cox6c|Cyc|Cype|Dmel\CG14028|VIc|cyc|l(2)03771	cyclope	protein-coding
11360	chr3R	16526031	16526750	+	0	NA	TTS (NR_133408)	TTS (NR_133408)	1026	NR_133408	26067349		NR_133408		CR46030	Dmel\CR46030	ncRNA	ncRNA
12337	chr3R	23818741	23819590	+	0	NA	promoter-TSS (NM_001014646)	promoter-TSS (NM_001014646)	72	NM_001275957	50068	Dm.1302	NM_176548		CG33111	CG10193|CG11945|CG11957|Dmel\CG33111	uncharacterized protein	protein-coding
12799	chr3R	27905641	27906250	+	0	NA	promoter-TSS (NM_001104479)	promoter-TSS (NM_001104479)	-102	NM_001300642	5740590	Dm.23047	NM_001104479		CG34353	CG12274|CG12427|CG12873|CG12874|CG12875|CG5566|CG5572|Dmel\CG34353|Dmel_CG12274|Dmel_CG12427|Dmel_CG12873|Dmel_CG12874|Dmel_CG12875|Dmel_CG5566|Dmel_CG5572	uncharacterized protein	protein-coding
8129	chr3L	15811411	15811810	+	0	NA	3' UTR (NM_168633, exon 5 of 6)	3' UTR (NM_168633, exon 5 of 6)	2125	NM_140546	39719	Dm.15267	NM_140546		CG13445	Dmel\CG13445	uncharacterized protein	protein-coding
9034	chr3L	22527491	22527760	+	0	NA	Intergenic	Intergenic	-9334	NR_048309	12798462		NR_048309		mir-957	CR42889|Dmel\CR42889|dme-mir-957|miR-957	mir-957 stem loop	ncRNA
1386	chr2L	10342371	10342900	+	0	NA	promoter-TSS (NM_001273400)	promoter-TSS (NM_001273400)	41	NM_058130	34397	Dm.3457	NM_058130		Sps2	CG5025|Dmel\CG5025|Dsps2|SPS2|dSPS2|dsps2|sps2	Selenophosphate synthetase 2	protein-coding
427	chr2L	3464921	3466800	+	0	NA	promoter-TSS (NM_164537)	promoter-TSS (NM_164537)	252	NM_078743	33565	Dm.14311	NM_078743		msl-2	CG3241|Dmel\CG3241|MSL|MSL-2|MSL2|Msl 1-3|Msl-2|Msl2|km(2)A|kmA|msl|msl2	male-specific lethal 2	protein-coding
11850	chr3R	20308971	20309920	+	0	NA	5' UTR (NM_001202323, exon 1 of 10)	5' UTR (NM_001202323, exon 1 of 10)	101	NM_001202322	42412	Dm.4545	NM_142621		CG42668	CG15684|CG5077|Dmel\CG42668|Dmel_CG15684|Dmel_CG5077	uncharacterized protein	protein-coding
16133	chrX	19520921	19523380	+	0	NA	promoter-TSS (NM_001201742)	promoter-TSS (NM_001201742)	51	NM_001014755	32941	Dm.4085	NM_001014752		CoRest	BcDNA:GH01486|BcDNA:LD11215|CG32534|CG32535|CG33525|CG3878|CG42687|CoREST|CoRESTG|Dmel\CG42687|Dmel_CG32534|Dmel_CG33525|dCoREST|i169	CoRest	protein-coding
11628	chr3R	18255111	18255770	+	0	NA	promoter-TSS (NM_001014637)	promoter-TSS (NM_001014637)	47	NM_001014635	326128	Dm.13710	NM_001014634		Ada2a	ADA2a|Ada2A|CG31318|CG33520|CG43663|CG7150|DmADA2a|DmAda2a|Dmel\CG43663|ada2a|dADA2a|dAda2A|dAda2a	transcriptional Adaptor 2a	protein-coding
6196	chr3L	707981	708570	+	0	NA	promoter-TSS (NM_138211)	promoter-TSS (NM_138211)	-70	NM_001274291	38087	Dm.5860	NM_138211		CG13895	Dmel\CG13895	uncharacterized protein	protein-coding
11444	chr3R	16851411	16851670	+	0	NA	non-coding (NR_125189, exon 2 of 2)	non-coding (NR_125189, exon 2 of 2)	1302	NR_125190	3772110		NR_002036		iab-4	CR31271|Dmel\CR31271|I|iab|pri-mir-iab-4_mir-iab-4as	ncRNA	ncRNA
9110	chr3L	23104501	23105150	+	0	NA	Intergenic	OSVALDO_I-int|LTR|Gypsy	3819	NM_001300223	48448	Dm.1750	NM_080179		CkIIalpha	0958/08|CG17520|CJIIalpha|CK II|CK-2|CK-II|CK-II alpha|CK2|CK2 alpha|CK2-alpha|CK2a|CK2alpha|CKII|CKII alpha|CKII-alpha|CKIIa|CKIIalfa|CKIIalpha|Cask-II-a|Ck2alpha|CkII|DmCK2alpha|DmCKIIalpha|Dmel\CG17520|Tik|alphaCK2|anon-WO02059370.53|ck2alpha|ckIIalpha|dCK2alpha|dCKII|dCKII alpha|l(3)S095808	casein kinase IIalpha	protein-coding
3925	chr2R	9933531	9934740	+	0	NA	intron (NM_206067, intron 2 of 9)	intron (NM_206067, intron 2 of 9)	-4520	NM_057671	36032	Dm.7054	NM_057670		Mef2	22.21|BEST:SD04091|C|CG1429|D-MEF2|D-Mef2|D-mef2|DMEF-2|DMEF2|DMedf2|DMef-2|DMef2|Dmef|Dmef-2|Dmef2|Dmel\CG1429|MEF-2|MEF2|Mef|Mef-2|SD04091|dMEF2|dMEf2|dMef2|dmef2|l(2)46CFr|mb247|mef|mef-2|mef2|mef2c	Myocyte enhancer factor 2	protein-coding
7817	chr3L	14028421	14029460	+	0	NA	TTS (NM_168572)	TTS (NM_168572)	181	NM_168571	39552	Dm.24000	NM_168571		Ptip	CG32133|CG6532|CG8797|Dmel\CG32133|PTIP|ptip	PAX transcription activation domain interacting protein	protein-coding
3893	chr2R	9699871	9700750	+	0	NA	Intergenic	CpG	-4074	NM_001169629	246384	Dm.14903	NM_001169629		CG30002	Dmel\CG30002	uncharacterized protein	protein-coding
11034	chr3R	14037361	14037700	+	0	NA	Intergenic	Intergenic	-1132	NM_001275627	41708	Dm.5908	NM_142072		CG9922	BcDNA:RE55111|Dmel\CG9922|NEST:bs28g09	CG9922	protein-coding
1240	chr2L	9148751	9149190	+	0	NA	intron (NM_001201816, intron 3 of 9)	intron (NM_001201816, intron 3 of 9)	-2229	NM_176002	34237	Dm.6376	NM_176001		CG32982	CG18566|CG9584|CG9585|Dmel\CG32982|p78	uncharacterized protein	protein-coding
6374	chr3L	1884571	1886000	+	0	NA	promoter-TSS (NM_167926)	promoter-TSS (NM_167926)	-266	NM_001299980	48224	Dm.20322	NM_057289		Aprt	BcDNA:LP07986|CG18315|Dmel\CG18315|aprt	Adenine phosphoribosyltransferase	protein-coding
16012	chrX	18656921	18657480	+	0	NA	promoter-TSS (NM_167627)	promoter-TSS (NM_167627)	34	NM_167627	32854	Dm.11562	NM_133089		CG6659	Dmel\CG6659	CG6659	protein-coding
221	chr2L	1449591	1450360	+	0	NA	Intergenic	Intergenic	7249	NM_001258909	12797876	Dm.37565	NM_001258909		CG43402	Dmel\CG43402	uncharacterized protein	protein-coding
12463	chr3R	24659371	24659740	+	0	NA	promoter-TSS (NM_170162)	promoter-TSS (NM_170162)	-66	NM_170162	326121	Dm.21116	NM_170162		CG31126	CG13621|Dmel\CG31126	uncharacterized protein	protein-coding
11924	chr3R	20890711	20891090	+	0	NA	Intergenic	Intergenic	2871	NR_125217	19835685		NR_125217		CR44947	Dmel\CR44947|lincRNA.822	ncRNA	ncRNA
12510	chr3R	25065451	25065930	+	0	NA	promoter-TSS (NM_170197)	promoter-TSS (NM_170197)	-99	NM_143073	43003	Dm.13950	NM_143073		veli	CG7662|D-veli|DLin-7|DLin7|Dmel\CG7662|Dveli|Flin-7|Lin-7|Veli|d-Veli|dLin-7|dLin7|dVeli|lin-7|lin7	veli	protein-coding
10507	chr3R	9808801	9809510	+	0	NA	TTS (NR_073992)	TTS (NR_073992)	213	NM_141697	41209	Dm.17044	NM_141697		FBXO11	CG9461|Dmel\CG9461|FBX011|dFBX011	F-box protein 11	protein-coding
9264	chr3L	25412901	25413220	+	0	NA	intron (NM_001316486, intron 5 of 7)	intron (NM_001316486, intron 5 of 7)	257920	NM_001316486	26067050		NM_001316486		CG45782	CG40467|CG41087|CG41343|Dmel\CG45782|Dmel_CG40467|Dmel_CG41087|Dmel_CG41343|GH10292|Slc45-2	uncharacterized protein	protein-coding
1865	chr2L	14274641	14274990	+	0	NA	promoter-TSS (NM_001144352)	promoter-TSS (NM_001144352)	-6	NM_001144351	318271	Dm.34173	NM_176038		CG32971	Dmel\CG32971	uncharacterized protein	protein-coding
13990	chrX	2624581	2625260	+	0	NA	promoter-TSS (NM_130657)	promoter-TSS (NM_130657)	116	NM_001272262	31247	Dm.11491	NM_130658		PI4KIIIalpha	CG10260|Dmel\CG10260|EG:BACR7C10.2|PI4K|PI4KIII[[alpha]]|PI4KinaseIIIalpha|Pi4KIIIalpha|Stt4|ZW-2|l(1)17-59|l(1)3Ah|l(1)VA722|l(1)zw2|stt4|zw-2|zw2	Phosphatidylinositol 4-kinase III alpha	protein-coding
12203	chr3R	22747411	22747790	+	0	NA	promoter-TSS (NM_142837)	promoter-TSS (NM_142837)	-1	NM_142837	42697	Dm.31332	NM_142837		CG17141	Dmel\CG17141	uncharacterized protein	protein-coding
9922	chr3R	5982731	5983120	+	0	NA	Intergenic	Intergenic	-6108	NM_079518	40738		NM_079518		Obp83b	83b|CG11422|DmelObp83b|Dmel\CG11422|OS-E|Os-E|PBP-H1|obp83b	Odorant-binding protein 83b	protein-coding
11626	chr3R	18250191	18250740	+	0	NA	promoter-TSS (NM_142441)	promoter-TSS (NM_142441)	-650	NM_142441	42188	Dm.16742	NM_142441		CG18598	CT42539|Dmel\CG18598	uncharacterized protein	protein-coding
13369	chr4	155241	155620	+	0	NA	intron (NM_001297780, intron 1 of 2)	intron (NM_001297780, intron 1 of 2)	630	NM_001297780	319064	Dm.20880	NM_166735		CG31997	BEST:GH25016|BcDNA:RE42475|Dmel\CG31997	uncharacterized protein	protein-coding
14924	chrX	9688481	9690130	+	0	NA	TTS (NR_123848)	TTS (NR_123848)	1116	NR_123848	19835852		NR_123848		CR42657	CG42657|Dmel\CR42657	ncRNA	ncRNA
13219	chr3R	31217371	31217740	+	0	NA	non-coding (NR_002092, exon 1 of 1)	non-coding (NR_002092, exon 1 of 1)	103	NR_133496	3772418		NR_002092		RNaseP:RNA	CR32868|Dmel\CR32868|P RNA|RNase P RNA|RPR RNA|chr3R:27043287..27043402	Ribonuclease P RNA	ncRNA
9910	chr3R	5772391	5772730	+	0	NA	promoter-TSS (NM_001170042)	promoter-TSS (NM_001170042)	-662	NM_169100	40713	Dm.12988	NM_141327		CG2082	BcDNA:GH02439|Dmel\CG2082	CG2082	protein-coding
416	chr2L	3333071	3333430	+	0	NA	TTS (NM_134922)	TTS (NM_134922)	436	NM_134923	33548	Dm.26718	NM_134923		CG15408	Dmel\CG15408	uncharacterized protein	protein-coding
11029	chr3R	14020671	14020970	+	0	NA	intron (NM_169566, intron 2 of 8)	intron (NM_169566, intron 2 of 8)	5142	NM_142068	41704	Dm.10784	NM_142068		rdx	0869/09|BEST:GM07940|CG10235|CG12537|CG9924|D-SPOP|Dmel\CG12537|Dmel_CG9924|Dromel_CG9924_FBtr0082871_rdx_mORF|HIB|Hib|Rdx|SPOP|Spop|anon-WO0118547.577|hib|l(3)03477|l(3)2004|l(3)88Aa|l(3)A6|l(3)S086909|l(3)SG40|l(3)dsl-6|l(3)dsl6|l(3)j1D1|l(3)j4C7|mei-P19	roadkill	protein-coding
9625	chr3R	4204001	4204670	+	0	NA	TTS (NM_001043190)	TTS (NM_001043190)	7027	NM_164315	40524	Dm.1050	NM_141179		beta-Man	CG12582|CG12583|Dmel\CG12582	beta-Mannosidase	protein-coding
1007	chr2L	7362601	7362970	+	0	NA	promoter-TSS (NM_135265)	promoter-TSS (NM_135265)	-594	NM_135265	34011		NM_135265		Wnt10	CG4971|D-Wnt-10|DWnt-10|DWnt10|Dm DWnt10|Dmel\CG4971|wnt10	Wnt oncogene analog 10	protein-coding
8348	chr3L	17401531	17401780	+	0	NA	promoter-TSS (NR_144649)	promoter-TSS (NR_144649)	-307	NR_144649	43918		NR_144649		noe	CG32172|CR32172|Dmel\CR32172|Noe|anon-EST:Posey101|anon-EST:Posey151|anon-EST:Posey243|anon-EST:Posey292|anon-EST:Posey35|anon-WO02059370.51	ncRNA	ncRNA
14841	chrX	9109041	9109660	+	0	NA	promoter-TSS (NM_001103448)	promoter-TSS (NM_001103448)	-200	NM_176717	31842	Dm.5374	NM_132299		AP-1gamma	AP-1|AP-1 gamma|AP-1[gamma]|AP1gamma|AP1gamma1|Ap-1|CG9113|Dmel\CG9113|apl4|cg9113|dgamma|gamma|gamma-Ada	Adaptor Protein complex 1, gamma subunit	protein-coding
10338	chr3R	8819401	8821300	+	0	NA	promoter-TSS (NR_125120)	promoter-TSS (NR_125120)	332	NM_001275461	41058	Dm.3732	NM_176424		CG9821	CG31442|Dmel\CG9821|Ov29|anon-WO0118547.399|anon-WO0118547.424	CG9821	protein-coding
6642	chr3L	4048941	4049370	+	0	NA	intron (NM_139596, intron 1 of 3)	intron (NM_139596, intron 1 of 3)	-1420	NM_001274464	38480	Dm.23442	NM_139597		Dpy-30L2	CG11591|Dmel\CG11591|dpy-30L2	Dpy-30-like 2	protein-coding
273	chr2L	1970221	1970930	+	0	NA	promoter-TSS (NM_001272960)	promoter-TSS (NM_001272960)	-213	NM_001272960	326152	Dm.8473	NM_134787		erm	CG31670|CG7312|Dmel\CG31670|dFezf|dfezl	earmuff	protein-coding
15207	chrX	12203201	12204340	+	0	NA	promoter-TSS (NM_001272554)	promoter-TSS (NM_001272554)	-28	NM_001258711	32183	Dm.147	NM_078582		Ten-a	1.2|CG11270|CG12720|CG15733|CG18182|CG2578|CG2590|CG32659|CG42338|Dmel\CG42338|Dmel_CG12720|Dmel_CG15733|Dmel_CG32659|DmtenA|Dmtena|Ten11A|Ten[a]|cbd|ten-a|tenA|tenA(AT)[[14]]|ten[a]	Tenascin accessory	protein-coding
2156	chr2L	16677021	16677450	+	0	NA	promoter-TSS (NM_001144358)	promoter-TSS (NM_001144358)	50	NM_057224	34992	Dm.4142	NM_057224		her	CG4694|Dmel\CG4694|FBgn 1185|l(2)mat	hermaphrodite	protein-coding
3603	chr2R	7615421	7615750	+	0	NA	intron (NM_001201944, intron 2 of 10)	intron (NM_001201944, intron 2 of 10)	-1050	NM_165545	35697	Dm.7075	NM_136457		CG1358	Dmel\CG1358	CG1358	protein-coding
568	chr2L	4393811	4394540	+	0	NA	promoter-TSS (NM_001273094)	promoter-TSS (NM_001273094)	-21	NM_134985	33644	Dm.294	NM_134985		l(2)k05819	CG3054|Dmel\CG3054|anon-WO0140519.156	lethal (2) k05819	protein-coding
11589	chr3R	18039991	18040320	+	0	NA	Intergenic	NOMAD_LTR|LTR|Gypsy	9211	NM_169785	42160	Dm.7690	NM_079670		htl	CG7223|CT22273|CT39172|DFGF-R1|DFGF-R2|DFR-1|DFR1|DFR1/DFGF-R2|DPR3|DTRK(FR1)|Dfr-1|Dfr1|DmHD-38|Dmel\CG7223|Dtk1|EMS2|FGF-R2|FGFR|FGFR2|FR1|Fr1|HD-38|HTL/FGFR1|Htl|Tk1|dtk1|i100|i150|i79|j372	heartless	protein-coding
13746	chrX	1048011	1048560	+	0	NA	intron (NR_123770, intron 1 of 1)	CpG-18835	1043	NR_123769	19835701		NR_123768		CR44779	Dmel\CR44779	ncRNA	ncRNA
14489	chrX	6709141	6709630	+	0	NA	5' UTR (NM_001272361, exon 3 of 9)	5' UTR (NM_001272361, exon 3 of 9)	298	NM_001272359	31611		NM_132116		CG14441	Dmel\CG14441	uncharacterized protein	protein-coding
1714	chr2L	12926161	12926460	+	0	NA	TTS (NM_001273494)	TTS (NM_001273494)	699	NM_144344	53426	Dm.23655	NM_144344		ACXE	AC|CG17178|DACXE|Dmel\CG17178	ACXE	protein-coding
10151	chr3R	7365661	7366380	+	0	NA	promoter-TSS (NM_079531)	promoter-TSS (NM_079531)	170	NM_079532	40889		NM_079532		Mst84Da	CG17946|Dmel\CG17946|Mst|Mst ORF|Mst84|Mst87D|Mstprox|mst(3)gl-1	Male-specific RNA 84Da	protein-coding
1655	chr2L	12476881	12477290	+	0	NA	intron (NM_001298946, intron 4 of 5)	intron (NM_001298946, intron 4 of 5)	6504	NM_001169494	34665	Dm.7349	NM_080364		bun	1550|Bun|BunA|CG31857|CG42281|CG5461|Dm_2L:60722|Dmel\CG42281|Dmel_CG31857|Dmel_CG5461|EP(2)0488|TSC-22|Tsc22|bnc|l(2)00255|l(2)02687|l(2)05479|l(2)06475|l(2)k02903|l(2)rI043|shs	bunched	protein-coding
3015	chr2R	1350431	1351010	+	0	NA	intron (NM_001110887, intron 1 of 6)	MAX_I-int|LTR|Pao	1328	NM_001110887	5740691	Dm.29278	NM_001110886		l(2)41Ab	1(2R)B|41Ab|CG40214|CG40334|CG41265|Dmel\CG41265|GroupI|l(2)EMS45-10|l(2R)B	lethal (2) 41Ab	protein-coding
15030	chrX	10785771	10786560	+	0	NA	intron (NM_167246, intron 1 of 4)	intron (NM_167246, intron 1 of 4)	742	NM_167246	32007	Dm.21507	NM_078554		sesB	A/A-T|A/A-T/sesB|ADP/ATP translocase|ADT2|ANT|ANT1|CG16944|Dmel\CG16944|EM12|Hmr|S12|SesB|anon-WO02059370.55|dANT|jive|l(1)9Ed|l(1)9Fa|l(1)DC701|l(1)EM31|l(1)G0126|l(1)G0247|l(1)G0386|l(1)S12|orangi|ses B	stress-sensitive B	protein-coding
9016	chr3L	22381991	22382500	+	0	NA	intron (NR_133305, intron 1 of 1)	intron (NR_133305, intron 1 of 1)	-21377	NR_133307	26067292		NR_133307		CR45965	Dmel\CR45965	ncRNA	ncRNA
4704	chr2R	14991441	14991740	+	0	NA	TTS (NM_206117)	TTS (NM_206117)	640	NM_206116	36675	Dm.19297	NM_206116		CG7639	Dmel\CG7639	CG7639	protein-coding
13701	chrX	700921	701300	+	0	NA	intron (NM_001297827, intron 2 of 15)	intron (NM_001297827, intron 2 of 15)	14276	NM_001297828	31017		NM_057941		sdk	BcDNA:LD22322|BcDNA:RE63453|CG5227|CT16627|Dmel\CG5227|EG:BACR19J1.1	sidekick	protein-coding
623	chr2L	4883031	4883410	+	0	NA	promoter-TSS (NM_001273128)	promoter-TSS (NM_001273128)	-78	NM_135027	33693	Dm.5994	NM_135027		CG3008	Dmel\CG3008	CG3008	protein-coding
10668	chr3R	11169451	11169820	+	0	NA	exon (NM_079589, exon 2 of 2)	exon (NM_079589, exon 2 of 2)	611	NM_079589	41333	Dm.7100	NM_079589		Ugt35b	AC 006491B|CG6649|DmeUgt35b|Dmel\CG6649|UDPGT2|UGT35b|Ugt-35b|Ugt35B|Ugt86Db|ugt35b	UDP-glycosyltransferase 35b	protein-coding
14719	chrX	8160561	8160960	+	0	NA	TTS (NM_132228)	TTS (NM_132228)	706	NM_132227	31748	Dm.31044	NM_132227		CG15337	Dmel\CG15337	uncharacterized protein	protein-coding
11961	chr3R	21218121	21219270	+	0	NA	promoter-TSS (NM_142699)	promoter-TSS (NM_142699)	96	NM_142698	42517	Dm.16654	NM_142698		Smyd5	CG3353|Dmel\CG3353	SET and MYND domain containing, class 5	protein-coding
4167	chr2R	11403951	11404660	+	0	NA	Intergenic	Intergenic	-1292	NM_165831	36234		NM_165831		Smyd4-3	CG7759|Dmel\CG7759	SET and MYND domain containing, class 4, member 3	protein-coding
8769	chr3L	20621611	20622500	+	0	NA	Intergenic	Intergenic	-1396	NM_001316439	40285	Dm.1017	NM_176374		knrl	CG4761|Dmel\CG4761|Knrl|NR0A2|knl	knirps-like	protein-coding
16190	chrX	19812171	19812480	+	0	NA	promoter-TSS (NM_134513)	promoter-TSS (NM_134513)	-404	NM_134513	32995		NM_134513		SkpD	BcDNA:AT18217|CG12700|Dmel\CG12700|Skp|dskpD|skpD	SKP1-related D	protein-coding
688	chr2L	5305111	5306140	+	0	NA	promoter-TSS (NM_001144320)	promoter-TSS (NM_001144320)	-25	NM_001298695	33759	Dm.3340	NM_057843		vri	CG14029|DM16|Dmel\CG14029|VRI|Vri|argo|jf23|l(2)25Db|l(2)jf23|mat(2)ea-G|mat(2)earlyRS32|mel_vri	vrille	protein-coding
11067	chr3R	14369381	14370600	+	0	NA	promoter-TSS (NM_001316524)	promoter-TSS (NM_001316524)	18	NM_001316524	41747	Dm.2986	NM_142100		NK7.1	CG8524|Dmel\CG8524|NK-7.1	NK7.1	protein-coding
14983	chrX	10330301	10330900	+	0	NA	promoter-TSS (NM_078551)	promoter-TSS (NM_078551)	-728	NM_078551	31960	Dm.12480	NM_078551		Gip	CG2227|Dmel\CG2227|T15|gene C	GIP-like	protein-coding
7965	chr3L	14956111	14957150	+	0	NA	Intergenic	Intergenic	6746	NR_133241	26067305		NR_133241		CR45978	Dmel\CR45978|lincRNA.556	ncRNA	ncRNA
1438	chr2L	10598351	10599140	+	0	NA	intron (NM_001201857, intron 1 of 9)	NOMAD_I-int|LTR|Gypsy	-17043	NM_001103673	5740441	Dm.33403	NM_001103673		CG34161	Dmel\CG34161	uncharacterized protein	protein-coding
5688	chr2R	22561131	22562140	+	0	NA	promoter-TSS (NM_137835)	promoter-TSS (NM_137835)	430	NM_001274207	37573	Dm.3051	NM_166535		px	CG4444|Dmel\CG4444|l(2)k08134|l(2)k08316	plexus	protein-coding
613	chr2L	4823291	4824590	+	0	NA	intron (NM_135017, intron 1 of 4)	intron (NM_135017, intron 1 of 4)	2166	NM_001273118	33681	Dm.14915	NM_135017		CG15628	Dmel\CG15628|anon-WO02059370.23	uncharacterized protein	protein-coding
15991	chrX	18529251	18529590	+	0	NA	3' UTR (NM_133081, exon 1 of 1)	3' UTR (NM_133081, exon 1 of 1)	737	NM_133081	32845	Dm.26664	NM_133081		CG15047	Dmel\CG15047	uncharacterized protein	protein-coding
14696	chrX	8058961	8059250	+	0	NA	promoter-TSS (NM_001272394)	promoter-TSS (NM_001272394)	-747	NM_001272394	31722	Dm.7909	NM_078523		fs(1)h	CG2252|Dmel\CG2252|FSH|Fs(1)h|Fs(1)h-L|Fs(1)hL|Fs(1)hS|Fsh|N72|ORE-1|anon-EST:Liang-1.81|anon-EST:fe1G2|clone 1.81|fs(1)1456|fs(1)26/26A|fs(1)M16|fs(1)R10.4|fsh|fst(1)h|l(1)7Da|l(1)G0093|l(1)G0495|rnc	female sterile (1) homeotic	protein-coding
9808	chr3R	5120171	5121060	+	0	NA	Intergenic	Intergenic	-7472	NM_141255	40617	Dm.4147	NM_141255		CG12007	Dmel\CG12007|PTAR3|RabGGTalpha	uncharacterized protein	protein-coding
14	chr2L	51521	52110	+	0	NA	intron (NM_001258876, intron 2 of 10)	LINEJ1_DM|LINE|Jockey	-3002	NR_133057	26067564		NR_133057		CR46254	Dmel\CR46254	ncRNA	ncRNA
13886	chrX	2085821	2086070	+	0	NA	intron (NM_130625, intron 1 of 4)	CpG	-3391	NM_001272244	31179	Dm.20488	NM_130625		Unc-76	BcDNA:GH10260|CG18851|CG3981|Dmel\CG3981|Dunc-76|EG:67A9.1|UNC-76|l(1)G0066|l(1)G0158|l(1)G0310|l(1)G0333|l(1)G0360|unc-76	Unc-76	protein-coding
3646	chr2R	7988801	7989500	+	0	NA	promoter-TSS (NM_136499)	promoter-TSS (NM_136499)	564	NM_001299248	35761	Dm.11366	NM_136498		ACC	A1Z784_DROME|ACoT|CG11198|CG8723|DmACC|Dmel\CG11198|FBgn0043811|dACC	Acetyl-CoA carboxylase	protein-coding
8744	chr3L	20491491	20492230	+	0	NA	promoter-TSS (NM_140977)	promoter-TSS (NM_140977)	-222	NM_140977	40272	Dm.7124	NM_140977		ND-39	CG6020|Dmel\CG6020|GM13757p|NDUFA9|NUEM|Ndufa9	NADH dehydrogenase (ubiquinone) 39 kDa subunit	protein-coding
1188	chr2L	8668341	8668650	+	0	NA	TTS (NM_001273336)	TTS (NM_001273336)	-4203	NM_058156	34193	Dm.14600	NM_058156		Glt	CG9280|CT26441|Dmel\CG9280	Glutactin	protein-coding
7274	chr3L	9809871	9810300	+	0	NA	Intergenic	Intergenic	-3762	NM_001274727	39153	Dm.15438	NM_168379		CG43897	BcDNA:RE55923|BcDNA:RH19933|CG14172|CG32049|CG32050|CG32051|CG33205|CG8154|CG8163|Dmel\CG43897|Dmel_CG32050|Dmel_CG33205	uncharacterized protein	protein-coding
1078	chr2L	7993651	7994550	+	0	NA	promoter-TSS (NM_001144336)	promoter-TSS (NM_001144336)	84	NM_164777	34087	Dm.5223	NM_135324		pes	CG7228|Dmel\CG7228|Pes	peste	protein-coding
4280	chr2R	12113481	12114780	+	0	NA	intron (NM_136882, intron 1 of 2)	intron (NM_136882, intron 1 of 2)	4723	NM_136882	36295	Dm.3501	NM_136882		jeb	CG13180|CG13182|CG30040|Dmel\CG30040|Jeb|l(2)SH0422|l(2)k05644	jelly belly	protein-coding
2778	chr2L	21552731	21553750	+	0	NA	Intergenic	MAX_I-int|LTR|Pao	15012	NM_001032160	3772632		NM_001032160		His2A:CG33832	CG33832|Dmel\CG33832	histone H2A	protein-coding
8042	chr3L	15314741	15315100	+	0	NA	Intergenic	Intergenic	-5003	NR_133242	26067524		NR_133242		CR46213	Dmel\CR46213|lincRNA.565	ncRNA	ncRNA
9560	chr3R	2965051	2965450	+	0	NA	intron (NM_001316564, intron 12 of 20)	ACCORD2_I-int|LTR|Gypsy	-220450	NR_125325	19835739		NR_125325		CR45220	Dmel\CR45220	ncRNA	ncRNA
9111	chr3L	23123661	23125090	+	0	NA	Intergenic	Gypsy8_LTR|LTR|Gypsy	-1650	NM_206425	2768951	Dm.33615	NM_206425		CG33217	BcDNA:RE15216|Dmel\CG33217	uncharacterized protein	protein-coding
6988	chr3L	7360291	7361410	+	0	NA	promoter-TSS (NM_168209)	promoter-TSS (NM_168209)	289	NM_139854	38819	Dm.14937	NM_139854		Sec63	CG8583|Dmel\CG8583|anon-WO0118547.333|peg|sec63	Secretory 63	protein-coding
10510	chr3R	9874131	9875070	+	0	NA	promoter-TSS (NM_001144558)	promoter-TSS (NM_001144558)	-81	NM_001144557	41217	Dm.4030	NM_001038952		Glut4EF	BcDNA:GH25505|BcDNA:GM06804|BcDNA:RE66512|BcDNA:RH63124|CG11676|CG12802|CG12804|CG12805|CG32469|CG33975|CG34360|CG43757|D-Glut4EF|Dmel\CG34360|Dmel_CG12802|Dmel_CG33975|stretch	Glucose transporter 4 enhancer factor	protein-coding
6105	chr3L	161701	162510	+	0	NA	intron (NM_001169831, intron 1 of 3)	intron (NM_001169831, intron 1 of 3)	1301	NM_001169831	38021	Dm.792	NM_167797		p130CAS	CG1212|CT1293|DCas|Dcas|Dmel\CG1212|p130Cas	p130CAS	protein-coding
10254	chr3R	8285911	8286410	+	0	NA	Intergenic	CpG	-1009	NR_125111	19836230		NR_125111		CR44318	Dmel\CR44318	ncRNA	ncRNA
10676	chr3R	11226371	11226800	+	0	NA	promoter-TSS (NM_141797)	promoter-TSS (NM_141797)	-177	NM_141797	41349	Dm.33439	NM_141797		CG17726	Dmel\CG17726	uncharacterized protein	protein-coding
6974	chr3L	7243661	7244120	+	0	NA	promoter-TSS (NM_139835)	promoter-TSS (NM_139835)	43	NM_139835	38796	Dm.31179	NM_139835		mRpL50	ANON-65Eb|BcDNA:GM06185|BcDNA:RE06140|CG8612|Dmel\CG8612|MRP-L50|anon-65Eb	mitochondrial ribosomal protein L50	protein-coding
7184	chr3L	9038871	9039740	+	0	NA	Intergenic	CpG	-2070	NM_140026	39039	Dm.3040	NM_140026		Doc1	CG5133|Dm-DOC1|Dmel\CG5133|Doc|Ect2|TBX6|Tb66F2|doc|doc1	Dorsocross1	protein-coding
2947	chr2L	23175731	23176600	+	0	NA	Intergenic	Intergenic	-1681	NM_001015383	3355094	Dm.1540	NM_001015383		CG12567	Dmel\CG12567	uncharacterized protein	protein-coding
7665	chr3L	12732531	12733110	+	0	NA	TTS (NM_080035)	TTS (NM_080035)	1791	NM_080035	44668	Dm.1823	NM_080035		SmD1	BcDNA:RE39488|CG10753|D1-Sm|Dmel\CG10753|dD1|l(2)SH3 003|l(3)SH003|smd1|snRNP|snRNP-69D|snRNP69D	Small ribonucleoprotein particle protein SmD1	protein-coding
8059	chr3L	15370141	15370610	+	0	NA	Intergenic	Intergenic	33683	NM_079357	39663	Dm.2661	NM_079357		Toll-6	18w-like|CG7250|CT22359|Dmel\CG7250|TOLL 6|Tl-6|Toll 6|dTLR6|dToll6|toll|toll-6	Toll-6	protein-coding
2636	chr2L	20806761	20807180	+	0	NA	intron (NM_165344, intron 1 of 2)	intron (NM_165344, intron 1 of 2)	-3004	NM_136215	35344	Dm.7117	NM_136215		CG9328	38E.22|BEST:LD01639|BcDNA:SD01241|Dmel\CG9328|LD01639	CG9328	protein-coding
8498	chr3L	18392921	18393260	+	0	NA	Intergenic	Intergenic	5345	NM_079414	40015	Dm.2529	NM_079414		rpr	CG4319|Dmel\CG4319|RPR|Reaper|Rpr|anon-WO0162936.19|rp	reaper	protein-coding
13035	chr3R	29841531	29841820	+	0	NA	promoter-TSS (NM_170435)	promoter-TSS (NM_170435)	18	NM_001202382	43528	Dm.4517	NM_170435		Cad99C	CA-10|CG15511|CG310034|CG31009|CG7805|CT35624|CT4930|Cad99c|DCad99C|Dm Cad99C|Dmel\CG31009|cad99C	Cadherin 99C	protein-coding
10270	chr3R	8347451	8347730	+	0	NA	promoter-TSS (NM_001170079)	promoter-TSS (NM_001170079)	11	NM_001170079	40997	Dm.27236	NM_141538		CG7352	Dmel\CG7352	CG7352	protein-coding
5375	chr2R	20069391	20069790	+	0	NA	Intergenic	NOMAD_LTR|LTR|Gypsy	11495	NR_124642	19835850		NR_124642		CR44631	Dmel\CR44631	ncRNA	ncRNA
1507	chr2L	11152361	11152710	+	0	NA	exon (NM_135652, exon 4 of 6)	exon (NM_135652, exon 4 of 6)	3186	NM_135652	34554	Dm.4327	NM_135652		CG6287	Dmel\CG6287|GH26	CG6287	protein-coding
10708	chr3R	11402881	11403340	+	0	NA	3' UTR (NM_001260117, exon 8 of 8)	3' UTR (NM_001260117, exon 8 of 8)	-4808	NM_079594	41364	Dm.2445	NM_079594		mRpL40	CG5242|Dmel\CG5242|MRPL22(24)|mRpL22-24	mitochondrial ribosomal protein L40	protein-coding
9512	chr3R	2115951	2116220	+	0	NA	intron (NM_001316563, intron 16 of 21)	PROTOP_A|DNA|P	-250077	NR_133318	26067438		NR_133318		CR46122	Dmel\CR46122	ncRNA	ncRNA
13090	chr3R	30197431	30197890	+	0	NA	exon (NM_143524, exon 3 of 6)	exon (NM_143524, exon 3 of 6)	-1432	NM_143523	43592	Dm.16300	NM_143523		CG15531	Dmel\CG15531	uncharacterized protein	protein-coding
5311	chr2R	19716621	19717170	+	0	NA	Intergenic	BLOOD_I-int|LTR|Gypsy	2819	NM_137602	37268	Dm.6276	NM_137602		CG8517	8517|Dmel\CG8517|mtr	CG8517	protein-coding
13318	chr3R	32027391	32027650	+	0	NA	TTS (NR_125315)	TTS (NR_125315)	-10810	NM_001300703	43762	Dm.16259	NM_143647		CG2053	Dmel\CG2053	CG2053	protein-coding
7699	chr3L	13049211	13050560	+	0	NA	TTS (NM_001300127)	TTS (NM_001300127)	2874	NM_140371	39486	Dm.18896	NM_140371		CG11279	BcDNA:GM21080|Dmel\CG11279	uncharacterized protein	protein-coding
11695	chr3R	19017701	19018180	+	0	NA	exon (NM_001104364, exon 5 of 5)	exon (NM_001104364, exon 5 of 5)	6090	NM_001300471	42279	Dm.11255	NM_142514		CG6005	Dmel\CG6005	CG6005	protein-coding
11103	chr3R	14628861	14629350	+	0	NA	intron (NM_142121, intron 7 of 10)	intron (NM_142121, intron 7 of 10)	-1373	NM_169594	41774		NM_169594		Cad88C	CG3389|CT11389|DCad88C|Dm Cad88C|Dmel\CG3389|cad88C	Cadherin 88C	protein-coding
7833	chr3L	14092281	14092740	+	0	NA	Intergenic	Intergenic	5543	NM_001274897	39566	Dm.7260	NM_079341		Fbp1	CG17285|DmeFBP1|Dmel\CG17285|FBP-1|FBP1|FbP1|Fbp-1|LP07910p|P1|fbp-1|fbp1	Fat body protein 1	protein-coding
15085	chrX	11321651	11323030	+	0	NA	promoter-TSS (NM_078561)	promoter-TSS (NM_078561)	17	NM_078561	32068		NM_078561		sisA	CG1641|DM29|Dmel\CG1641|sis A|sis a|sis-A|sis-a|sisa	sisterless A	protein-coding
2663	chr2L	21035641	21036420	+	0	NA	intron (NM_001316403, intron 2 of 5)	intron (NM_001316403, intron 2 of 5)	15953	NM_001144373	7354398	Dm.6495	NM_001144373		CG42238	CG9266|Dmel\CG42238	uncharacterized protein	protein-coding
15990	chrX	18528331	18528800	+	0	NA	promoter-TSS (NM_133081)	promoter-TSS (NM_133081)	-118	NM_133081	32845	Dm.26664	NM_133081		CG15047	Dmel\CG15047	uncharacterized protein	protein-coding
53	chr2L	245541	246030	+	0	NA	intron (NM_001258891, intron 1 of 16)	intron (NM_001258891, intron 1 of 16)	-2644	NR_047867	12797869	Dm.38858	NR_047867		mir-965	965|CR42959|Dmel\CR42959|dme-miR-965|miR-965	mir-965 stem loop	ncRNA
15034	chrX	10807801	10808940	+	0	NA	intron (NM_001258687, intron 2 of 6)	intron (NM_001258687, intron 2 of 6)	-1514	NM_001042803	32009	Dm.3773	NM_078556		Imp	CG1691|Dmel\CG1691|IGF-II|IGF2BP1|IMP|IMP-1|MRE11|ORE-9|anon-EST:fe2B3|anon-WO0140519.39|cg1691|dIMP|imp|l(1)G0072|mre11	IGF-II mRNA-binding protein	protein-coding
9426	chr3R	120611	121650	+	0	NA	Intergenic	NTS_DM|Other|Other	-445946	NM_001316563	26067052		NM_001316563		Myo81F	CG15831|CG40155|CG40204|CG41281|CG41518|CG41527|CG42621|CG42622|CG42623|CG42624|CG45784|Dmel\CG45784|Dmel_CG15831|Dmel_CG40155|Dmel_CG40204|Dmel_CG41281|Dmel_CG41518|Dmel_CG41527|Dmel_CG42621|Dmel_CG42622|Dmel_CG42623|Dmel_CG42624	Myosin 81F	protein-coding
1067	chr2L	7887121	7887490	+	0	NA	TTS (NM_001042880)	TTS (NM_001042880)	208	NM_175980	34079	Dm.345	NM_175980		CG7102	CG17973|Dmel\CG7102	CG7102	protein-coding
354	chr2L	2808031	2808390	+	0	NA	promoter-TSS (NM_078737)	promoter-TSS (NM_078737)	-112	NM_078737	33474	Dm.6843	NM_078737		daw	ALP23B|Alp|Alp23B|Alp23b|CG16987|DAW|Daw|Dmel\CG16987|cg16987	dawdle	protein-coding
1641	chr2L	12366471	12366730	+	0	NA	intron (NM_001259070, intron 1 of 6)	intron (NM_001259070, intron 1 of 6)	234	NM_001259070	250811	Dm.412	NM_135715		bru2	Bru-2|CG17008|CG31761|CG31763|CG43065|CG6319|Dm Bru-2|Dmel\CG43065|Dmel_CG31761|Dmel_CG31763|bru-2	bruno 2	protein-coding
11183	chr3R	15286631	15287080	+	0	NA	intron (NM_169638, intron 4 of 11)	intron (NM_169638, intron 4 of 11)	436	NM_169639	41852	Dm.19116	NM_079636		Tm1	1305/10|2299|BcDNA:GH09289|BcDNA:LD37158|BcDNA:SD21996|CG4898|Dm Tm1|Dm TmH33|Dm TmH34|DmTm1|Dmel\CG4898|PmI|TM|TM1|TMII|Tm|TmH|TmH-33|TmH-34|TmH33|TmH34|TmII|Tmr33|Tmr34|TnH|TnH-33|TnH-34|cTM|cTm|cTmII|chr3R:11122272..11122408|l(3)02299|l(3)S130510|l(3)s2958|mTmII|region 3|tm1|tmII|tropomyosin	Tropomyosin 1	protein-coding
16457	chrX	23032841	23033110	+	0	NA	exon (NM_001015263, exon 6 of 8)	exon (NM_001015263, exon 6 of 8)	-3091	NM_001015258	3354990	Dm.29318	NM_001015258		CG12061	CG40148|Dmel\CG12061	uncharacterized protein	protein-coding
6012	chr2R	24985571	24986930	+	0	NA	promoter-TSS (NM_001299944)	promoter-TSS (NM_001299944)	-180	NM_001299944	37999		NM_079135		emp	CG2727|Dmel\CG2727	epithelial membrane protein	protein-coding
488	chr2L	3817611	3818780	+	0	NA	non-coding (NR_073714, exon 1 of 1)	non-coding (NR_073714, exon 1 of 1)	471	NR_073714	14462690		NR_073714		CR44077	Dmel\CR44077	ncRNA	ncRNA
7630	chr3L	12591521	12591960	+	0	NA	intron (NM_001169961, intron 3 of 4)	intron (NM_001169961, intron 3 of 4)	11068	NM_079321	39439	Dm.2892	NM_079321		ara	Ara|CG10571|Dmel\CG10571|IRO-C|Iro|Iro-C|IroC|iro|iro-C	araucan	protein-coding
6007	chr2R	24948211	24948610	+	0	NA	promoter-TSS (NM_138143)	promoter-TSS (NM_138143)	-32	NM_138142	37992	Dm.9386	NM_138142		CG2790	BcDNA:GH03108|Dmel\CG2790	CG2790	protein-coding
8157	chr3L	15960641	15960990	+	0	NA	TTS (NM_140561)	TTS (NM_140561)	1636	NM_001274976	39736	Dm.12896	NM_140560		CG17032	Dmel\CG17032	uncharacterized protein	protein-coding
15428	chrX	14182961	14183520	+	0	NA	promoter-TSS (NR_133524)	promoter-TSS (NR_133524)	-524	NR_133524	26067316		NR_133524		CR45995	Dmel\CR45995	ncRNA	ncRNA
10924	chr3R	13277011	13278310	+	0	NA	Intergenic	Intergenic	-2061	NM_169500	41629	Dm.13697	NM_169500		CG8630	Dmel\CG8630	CG8630	protein-coding
8366	chr3L	17505121	17505450	+	0	NA	intron (NM_001300166, intron 3 of 8)	intron (NM_001300166, intron 3 of 8)	8627	NM_140733	39955	Dm.987	NM_140733		U4-U6-60K	CG6322|Dmel\CG6322|Prp4|U4/U6-60K	U4-U6 small nuclear riboprotein factor 60K	protein-coding
14455	chrX	6365711	6366140	+	0	NA	promoter-TSS (NM_206635)	promoter-TSS (NM_206635)	-24	NM_206634	31581	Dm.11038	NM_132092		Marf	CG3869|CG38869|Dmel\CG3869|MARF|Marf-1|Mfn|Mfn-2|anon-WO0125274.3|dMFN|dMfn|dMfn2|dmfn|marf|mfn|mfn2	Mitochondrial assembly regulatory factor	protein-coding
1479	chr2L	10987591	10987960	+	0	NA	promoter-TSS (NM_143799)	promoter-TSS (NM_143799)	-31	NM_143799	47730	Dm.10633	NM_143799		CG12253	BEST:LD08487|DPLG1|Dmel\CG12253|LD08487	uncharacterized protein	protein-coding
918	chr2L	6853781	6854370	+	0	NA	promoter-TSS (NM_135235)	promoter-TSS (NM_135235)	-67	NM_135235	33960		NM_135235		l(2)k09022	CG10805|Dmel\CG10805|anon-WO0118547.160	lethal (2) k09022	protein-coding
7459	chr3L	11403391	11404310	+	0	NA	Intergenic	(GCA)n|Simple_repeat|Simple_repeat	-1685	NR_124890	19834955		NR_124890		CR44363	Dmel\CR44363	ncRNA	ncRNA
907	chr2L	6795711	6796250	+	0	NA	intron (NM_057820, intron 3 of 7)	intron (NM_057820, intron 3 of 7)	803	NM_001014475	33953	Dm.4056	NM_057820		nrv2	42kDa|CG9261|Dmel\CG9261|K-ATPase|NEST:bs13c10|Na|NaK ATPase|Na[+]/K[+] ATPase|Na[+]/K[+]-ATPase|Na[+]/K[+]ATPase|Nrv|Nrv2|Nrv2.2|ecta|l(2)SH0329|l(2)SH2 0329|l(2)k04223|l(2)k13315|nrv2.2	nervana 2	protein-coding
58	chr2L	271501	272010	+	0	NA	promoter-TSS (NM_164377)	promoter-TSS (NM_164377)	-11	NM_134663	33190	Dm.4432	NM_134663		CG3645	Dmel\CG3645	CG3645	protein-coding
11916	chr3R	20821061	20822660	+	0	NA	promoter-TSS (NM_001043269)	promoter-TSS (NM_001043269)	-12	NM_142659	42463	Dm.13360	NM_142659		CG17271	Dm_3R:88623|Dmel\CG17271	uncharacterized protein	protein-coding
737	chr2L	5550621	5550940	+	0	NA	promoter-TSS (NM_135095)	promoter-TSS (NM_135095)	55	NM_135095	33784	Dm.13485	NM_135095		CG14014	Dmel\CG14014	uncharacterized protein	protein-coding
10212	chr3R	8112831	8114460	+	0	NA	non-coding (NR_125107, exon 1 of 2)	non-coding (NR_125107, exon 1 of 2)	358	NR_125106	19835062		NR_125106		CR44331	Dmel\CR44331	ncRNA	ncRNA
9464	chr3R	1213201	1213510	+	0	NA	intron (NM_001316563, intron 8 of 21)	IDEFIX_I-int|LTR|Gypsy	153246	NR_133317	26067439		NR_133317		CR46123	Dmel\CR46123	ncRNA	ncRNA
3905	chr2R	9822821	9823130	+	0	NA	promoter-TSS (NM_165697)	promoter-TSS (NM_165697)	-20	NM_165697	246383	Dm.16222	NM_165697		CG30001	Dmel\CG30001	uncharacterized protein	protein-coding
3030	chr2R	1525071	1526210	+	0	NA	intron (NM_001015167, intron 1 of 5)	S_DM|DNA|TcMar-Tc1	1303	NM_001110544	3354925	Dm.35882	NM_001015167		Maf1	CG40196|CR41604|Dmel\CG40196|dMaf1	Maf1	protein-coding
10824	chr3R	12383751	12384110	+	0	NA	promoter-TSS (NM_001144568)	promoter-TSS (NM_001144568)	-400	NM_001144568	41512	Dm.19102	NM_141926		GstD11	BcDNA:RE72392|CG17639|DmGSTD11|Dmel\CG17639|GSTD11|cg17639|gstd11	Glutathione S transferase D11	protein-coding
6856	chr3L	5993661	5994800	+	0	NA	Intergenic	Intergenic	-2978	NM_168153	38677	Dm.15592	NM_168153		PVRAP	CG13292|CG32406|CG6062|Dmel\CG32406	PVR adaptor protein	protein-coding
5215	chr2R	18799381	18799940	+	0	NA	intron (NM_001299662, intron 1 of 3)	intron (NM_001299662, intron 1 of 3)	2745	NM_001299662	46085	Dm.10938	NM_143781		MFS14	8717|CG15095|Dmel\CG15095|l(2)08717|l208717|lethal (2) 08717|lethal(2)08717	Major Facilitator Superfamily Transporter 14	protein-coding
4682	chr2R	14858321	14858980	+	0	NA	promoter-TSS (NM_001014528)	promoter-TSS (NM_001014528)	-10	NM_001014528	3346177	Dm.30981	NM_001014528		CG33506	CG10220|Dmel\CG33506	uncharacterized protein	protein-coding
2651	chr2L	20966781	20967110	+	0	NA	3' UTR (NM_001144374, exon 2 of 2)	3' UTR (NM_001144374, exon 2 of 2)	2022	NM_001144374	7354398	Dm.6495	NM_001144373		CG42238	CG9266|Dmel\CG42238	uncharacterized protein	protein-coding
3393	chr2R	6190201	6190860	+	0	NA	intron (NM_001259216, intron 1 of 9)	intron (NM_001259216, intron 1 of 9)	5479	NM_001273793	35546	Dm.17870	NM_136365		Ptr	CG11212|Dmel\CG11212|Dmptr|Ptr_Dm|ptc-related-gene|ptr	Patched-related	protein-coding
1798	chr2L	13770911	13771240	+	0	NA	promoter-TSS (NM_135825)	promoter-TSS (NM_135825)	-20	NM_135825	34778	Dm.4331	NM_135825		TM9SF4	BG:DS00797.1|CG16861|CG7364|Dmel\CG7364|n(2)k07245	Transmembrane 9 superfamily protein member 4	protein-coding
12233	chr3R	22968561	22968980	+	0	NA	TTS (NM_170042)	TTS (NM_170042)	2486	NM_170042	318658	Dm.7462	NM_170042		Tpl94D	CG31281|Dmel\CG31281|NEST:bs11b10|NEST:bs30g09|Tpl[94D]|tpl|tpl94D|tpl[94D]	Transition protein-like 94D	protein-coding
13117	chr3R	30376401	30376870	+	0	NA	Intergenic	DM412|LTR|Gypsy	10965	NM_001260437	46415	Dm.1630	NM_080134		Fer1HCH	1HCH|BEST:LD36673|CG2216|Dmel\CG2216|FER1|FER1HCH|Fe1HCH|Fer-L|Fer1|Fer1HC|FerHCH|HCH|T21|T9|fer1|fer1hch|l(3)00451|l(3)j10B4	Ferritin 1 heavy chain homologue	protein-coding
13025	chr3R	29774461	29774730	+	0	NA	non-coding (NR_133481, exon 1 of 1)	non-coding (NR_133481, exon 1 of 1)	456	NR_133481	26067427		NR_133481		CR46110	Dmel\CR46110	ncRNA	ncRNA
1756	chr2L	13365851	13366950	+	0	NA	promoter-TSS (NM_143719)	promoter-TSS (NM_143719)	-47	NM_135797	34745	Dm.7756	NM_135797		CG6523	Dmel\CG6523|Grx3|Grx4	CG6523	protein-coding
4393	chr2R	12801901	12802260	+	0	NA	TTS (NM_165951)	TTS (NM_165951)	-2821	NR_124529	19835272		NR_124529		CR45137	Dmel\CR45137	ncRNA	ncRNA
10025	chr3R	6757601	6757870	+	0	NA	exon (NM_176411, exon 3 of 4)	exon (NM_176411, exon 3 of 4)	1731	NM_169157	40830	Dm.3237	NM_057477		bcd	BCD|BG:DS00276.7|Bcd|Bicoid|CG1034|Dmel\CG1034|bic|mum|prd4	bicoid	protein-coding
2072	chr2L	16124161	16124790	+	0	NA	Intergenic	Intergenic	-9033	NM_135934	34949	Dm.5031	NM_135934		CG4892	BG:DS04095.2|BcDNA:AT24169|DS04095.2|Dmel\CG4892	CG4892	protein-coding
10552	chr3R	10324691	10325460	+	0	NA	exon (NM_141738, exon 9 of 32)	exon (NM_141738, exon 9 of 32)	6278	NM_001275534	41260	Dm.13678	NM_141738		Bruce	BRUCE|CG6303|Dmel\CG6303|bruce|dBRUCE|dBruce|dbruce|mod86	BIR repeat containing ubiquitin-conjugating enzyme	protein-coding
10700	chr3R	11378251	11379140	+	0	NA	intron (NM_001260115, intron 6 of 7)	CpG	5907	NM_169386	41363	Dm.7116	NM_079593		pros	0244/09|0320/10|0441/16|0451/09|0563/18|0585/13|0664/07|0671/02|0763/13|0989/01|1135/07|1135/09|1167/13|1316/02|671/2|BcDNA:HL08040|CG17228|DMPROSPER|DROPROSA|Dmel\CG17228|PROS|PROS-1|PROS-2|Pro|Pros|Prosp|Voila|anon-WO0140519.15|l(3)10419|l(3)j12C8|l(3)j6E2|l(3)rH013|l(3)rI160|l(3)rJ806|l(3)rK137|l(3)rK204|l(3)rL433|l(3)rO534|pro|voila	prospero	protein-coding
13073	chr3R	30058071	30058750	+	0	NA	promoter-TSS (NM_001144657)	promoter-TSS (NM_001144657)	99	NM_079845	43580	Dm.6953	NM_079845		sima	7951|CG31031|CG45051|CG7951|DMU43090|Dmel\CG45051|Dmel_CG31031|Dmel_CG7951|HIF alpha|HIF-1|HIF-1alpha|HIF-alpha/sima|HIF1alpha|Hif-1A|Hif1alpha|SIMA|Sima|bHLHe56|dHIF-1alpha|dHIF-alpha|l(3)j11B7	similar	protein-coding
7456	chr3L	11369391	11369710	+	0	NA	Intergenic	Intergenic	-4665	NM_140203	39274	Dm.15394	NM_140203		CG6163	Dmel\CG6163	CG6163	protein-coding
4950	chr2R	16850071	16850630	+	0	NA	promoter-TSS (NM_137318)	promoter-TSS (NM_137318)	-87	NM_137318	36886	Dm.658	NM_137318		IntS8	CG5859|Dmel\CG5859|EG:EG0003.5|Int8	Integrator 8	protein-coding
15056	chrX	10926961	10928200	+	0	NA	exon (NM_132440, exon 1 of 4)	exon (NM_132440, exon 1 of 4)	124	NM_001298173	32027	Dm.126	NM_132440		CG2145	Dmel\CG2145	CG2145	protein-coding
13386	chr4	255181	255440	+	0	NA	5' UTR (NM_001038713, exon 1 of 8)	5' UTR (NM_001038713, exon 1 of 8)	313	NM_001258487	43781		NM_143657		RhoGAP102A	BP1050|CG1748|CG34013|CG42316|Dm_4:1183|Dmel\CG42316|Dmel_CG1748|Dmel_CG34013|mlncRNA102B1|rhoGAP102A	Rho GTPase activating protein at 102A	protein-coding
6058	chr2R	25191931	25192730	+	0	NA	intron (NM_001274250, intron 3 of 8)	intron (NM_001274250, intron 3 of 8)	-2206	NM_001274251	38011	Dm.14982	NM_166707		CG9380	Dmel\CG9380	CG9380	protein-coding
10319	chr3R	8719181	8719460	+	0	NA	promoter-TSS (NM_001260063)	promoter-TSS (NM_001260063)	122	NM_141562	41036	Dm.5202	NM_141562		CG11760	BcDNA:LD16427|Dmel\CG11760	uncharacterized protein	protein-coding
16290	chrX	20709781	20710460	+	0	NA	Intergenic	Intergenic	15681	NM_078700	33059	Dm.2688	NM_078700		run	1|2|AA33|CG1849|Dmel\CG1849|LB5|P235|RUN|Rnt|Run|Runt|l(1)19Ea|l(1)AA33|l(1)B2/13.1|l(1)LB9|lLB5|leg	runt	protein-coding
3158	chr2R	3973131	3973990	+	0	NA	Intergenic	Intergenic	-4167	NR_125412	19835838		NR_125318		CR45139	Dmel\CR45139	ncRNA	ncRNA
13187	chr3R	30865491	30866500	+	0	NA	Intergenic	Intergenic	-1526	NM_143572	43657	Dm.6377	NM_143572		Cpr100A	CG12045|DmelCpr100A|Dmel\CG12045	Cuticular protein 100A	protein-coding
14614	chrX	7476271	7476990	+	0	NA	Intergenic	Intergenic	-10922	NR_123825	19834839		NR_123825		CR45534	Dmel\CR45534	ncRNA	ncRNA
11476	chr3R	16973761	16974040	+	0	NA	Intergenic	Intergenic	-1304	NM_142321	42041	Dm.27318	NM_142321		VhaM9.7-d	CG14909|Dmel\CG14909|vhaM9.7-4	Vacuolar H[+] ATPase M9.7 subunit d	protein-coding
12509	chr3R	25054261	25055160	+	0	NA	promoter-TSS (NM_170194)	promoter-TSS (NM_170194)	-57	NM_001276017	43001	Dm.6101	NM_170194		CG31109	BcDNA:RE17222|CG13649|Dmel\CG31109	uncharacterized protein	protein-coding
6896	chr3L	6431771	6432230	+	0	NA	intron (NM_139788, intron 1 of 6)	ROO_LTR|LTR|Pao	31410	NM_139788	38732	Dm.27069	NM_139788		CG42747	CG14910|CG14911|Dmel\CG42747|Dmel_CG14910|Dmel_CG14911	uncharacterized protein	protein-coding
5967	chr2R	24653711	24654240	+	0	NA	Intergenic	DM412|LTR|Gypsy	-7528	NM_138108	37944	Dm.779	NM_138108		CG3663	Dmel\CG3663	CG3663	protein-coding
1019	chr2L	7495291	7496760	+	0	NA	TTS (NM_078781)	TTS (NM_078781)	282	NM_001273278	34030	Dm.13216	NM_135281		Ziz	BcDNA:RH71439|CG15819|CG42533|CG6630|Dm ziz|Dmel\CG42533|Dmel_CG15819|Dmel_CG6630	Zizimin	protein-coding
1009	chr2L	7400071	7400500	+	0	NA	Intergenic	Intergenic	-1050	NM_001201780	34016	Dm.8590	NM_135269		CG5171	Dmel\CG5171	CG5171	protein-coding
12210	chr3R	22781561	22781950	+	0	NA	promoter-TSS (NM_176542)	promoter-TSS (NM_176542)	27	NM_176542	42703		NM_176542		CG7029	Dmel\CG7029	CG7029	protein-coding
11004	chr3R	13909101	13911710	+	0	NA	Intergenic	Intergenic	8552	NM_169560	41697	Dm.1755	NM_169560		ems	CG2988|Dmel\CG2988|E4|EMS|Ems|W13|ant	empty spiracles	protein-coding
8500	chr3L	18402871	18403880	+	0	NA	Intergenic	Intergenic	-4940	NM_079414	40015	Dm.2529	NM_079414		rpr	CG4319|Dmel\CG4319|RPR|Reaper|Rpr|anon-WO0162936.19|rp	reaper	protein-coding
16391	chrX	21623361	21623810	+	0	NA	intron (NM_167766, intron 1 of 2).3	CpG-22015	140	NM_167766	318252	Dm.36391	NM_167766		CG32857	Dmel\CG32857	uncharacterized protein	protein-coding
13203	chr3R	30936051	30936400	+	0	NA	TTS (NM_143578)	TTS (NM_143578)	282	NM_143577	43665	Dm.14584	NM_143577		CG15549	BcDNA:AT07554|Dmel\CG15549	uncharacterized protein	protein-coding
4324	chr2R	12436841	12438000	+	0	NA	promoter-TSS (NM_001032237)	promoter-TSS (NM_001032237)	75	NM_165904	36362		NM_078988		Dyb	CG8529|DmDYB|Dmel\CG8529	Dystrobrevin	protein-coding
4812	chr2R	15835021	15835660	+	0	NA	promoter-TSS (NM_001274087)	promoter-TSS (NM_001274087)	-285	NM_001274087	36741	Dm.4653	NM_057338		Poxn	CG8246|Dmel\CG8246|P4|Pox-n|neuro|pox-n|poxn	Pox neuro	protein-coding
788	chr2L	6032571	6032850	+	0	NA	intron (NM_001298721, intron 4 of 6)	intron (NM_001298721, intron 4 of 6)	1713	NM_001298721	33844	Dm.19586	NM_135138		CG9109	Dmel\CG9109|dC1GalT9	CG9109	protein-coding
14565	chrX	7147101	7148520	+	0	NA	intron (NR_002102, intron 2 of 2)	intron (NR_002102, intron 2 of 2)	2040	NR_002102	3772297		NR_002102		CR32730	BcDNA:RE54930|Dmel\CR32730|MRE32	ncRNA	ncRNA
9652	chr3R	4349971	4350670	+	0	NA	Intergenic	CpG	-3674	NM_079497	40549	Dm.2495	NM_079497		hkb	5953|CG9768|Dmel\CG9768|HKB|Hkb|anon-82B3|gurt	huckebein	protein-coding
5109	chr2R	18162671	18163370	+	0	NA	exon (NM_137455, exon 4 of 4)	exon (NM_137455, exon 4 of 4)	2300	NM_001299636	37076	Dm.12105	NM_137455		CG10915	Dmel\CG10915	uncharacterized protein	protein-coding
14893	chrX	9414191	9415220	+	0	NA	intron (NM_001298124, intron 2 of 14)	intron (NM_001298124, intron 2 of 14)	31507	NM_001298127	19835594		NM_001298127		CG44815	Dmel\CG44815	uncharacterized protein	protein-coding
508	chr2L	4010731	4011360	+	0	NA	Intergenic	Intergenic	2392	NM_134972	14462693	Dm.21529	NM_134972		CG43774	CG10039|Dmel\CG43774	uncharacterized protein	protein-coding
9852	chr3R	5374391	5375370	+	0	NA	promoter-TSS (NM_001014607)	promoter-TSS (NM_001014607)	82	NM_001316495	40642	Dm.13653	NM_141274		hd	CG2669|Dmel\CG2669|fs(3)272|fs(3)272-9|l(3)82Ff|l(3)82Fk	humpty dumpty	protein-coding
231	chr2L	1501971	1503030	+	0	NA	intron (NM_134758, intron 1 of 3)	intron (NM_134758, intron 1 of 3)	404	NM_001272942	33332	Dm.258	NM_134758		CG7420	Dmel\CG7420	CG7420	protein-coding
14788	chrX	8670121	8670380	+	0	NA	Intergenic	Intergenic	-6813	NM_001272419	31803	Dm.13223	NM_132268		CG12772	Dmel\CG12772|FBgn 30055	uncharacterized protein	protein-coding
15342	chrX	13272021	13272560	+	0	NA	intron (NM_001272579, intron 2 of 12)	intron (NM_001272579, intron 2 of 12)	454	NM_167356	32278	Dm.6484	NM_132640		HDAC4	CG1770|DHDAC4|Dmel\CG1770|GC1770|HDAC|HDAC4a|dHDAC4|dmHDA405|hdac4	Histone deacetylase 4	protein-coding
13863	chrX	1941231	1941810	+	0	NA	promoter-TSS (NM_001038734)	promoter-TSS (NM_001038734)	-420	NM_001272232	31162	Dm.17760	NM_001038734		Hr4	CG16902|CG3600|CG42527|CG43692|CG43934|DHR4|Dmel\CG43934|Dmel_CG16902|Dmel_CG3600|Dmel_CG42527|EG:133E12.2|EG:BACH61I5.1|EP(X)1232|EP1232|GRF|NR6A2|null	Hormone receptor 4	protein-coding
10803	chr3R	12252351	12253170	+	0	NA	Intergenic	(CGGTTT)n|Simple_repeat|Simple_repeat	-1427	NM_141914	41489	Dm.7673	NM_141914		CG3942	Dmel\CG3942	CG3942	protein-coding
5354	chr2R	20029311	20029580	+	0	NA	Intergenic	Intergenic	-12350	NR_124641	19835251		NR_124641		CR44630	Dmel\CR44630	ncRNA	ncRNA
8284	chr3L	16865411	16865840	+	0	NA	TTS (NM_140672)	TTS (NM_140672)	330	NM_206388	39889	Dm.6522	NM_140673		Lmpt	BcDNA:RE37250|CG11914|CG11915|CG11916|CG32171|CG33256|CG42679|CG9959|Dmel\CG42679|Dmel_CG11915|Dmel_CG32171|Dmel_CG33256|lmpt	Limpet	protein-coding
12008	chr3R	21412911	21413630	+	0	NA	intron (NM_001275876, intron 1 of 3)	intron (NM_001275876, intron 1 of 3)	4147	NM_169959	318736	Dm.26564	NM_169959		CheB93b	CG31438|Dmel\CG31438	Chemosensory protein B 93b	protein-coding
4980	chr2R	17141271	17141740	+	0	NA	promoter-TSS (NM_001259457)	promoter-TSS (NM_001259457)	-640	NM_001259457	12798326	Dm.37573	NM_001259457		CG43107	Dmel\CG43107|MIP12466|lincRNA.331	uncharacterized protein	protein-coding
6799	chr3L	5651931	5652230	+	0	NA	TTS (NM_001300016)	TTS (NM_001300016)	-2601	NM_139726	38639	Dm.13816	NM_139726		lin-28	BcDNA:RE05342|CG17334|Dmel\CG17334|EP(3)0915|lin28	lin-28	protein-coding
14237	chrX	4598031	4598310	+	0	NA	intron (NR_123790, intron 1 of 4)	intron (NR_123790, intron 1 of 4)	13215	NR_123790	19835374		NR_123790		CR32773	CG32773|Dmel\CR32773	ncRNA	ncRNA
4756	chr2R	15460631	15461240	+	0	NA	exon (NM_001274069, exon 16 of 17)	exon (NM_001274069, exon 16 of 17)	21899	NM_001299529	36713	Dm.638	NM_137195		CG8180	Dmel\CG8180	CG8180	protein-coding
344	chr2L	2624591	2625070	+	0	NA	TTS (NR_124036)	TTS (NR_124036)	3025	NR_124036	19835239		NR_124036		CR45705	Dmel\CR45705	ncRNA	ncRNA
4532	chr2R	13809871	13810310	+	0	NA	exon (NM_137058, exon 6 of 21)	exon (NM_137058, exon 6 of 21)	3905	NM_001259374	36526	Dm.6691	NM_137058		stj	CG12295|Dmel\CG12295|alpha[[2]]delta|alpha[[2]]delta-3|dalpha[[2]]delta-3|l(2)k10814	straightjacket	protein-coding
2499	chr2L	19586961	19587590	+	0	NA	promoter-TSS (NM_001273667)	promoter-TSS (NM_001273667)	49	NM_001273667	35259	Dm.24416	NM_078880		Lar	CG10443|DLAR|DLar|Dlar|Dmel\CG10443|LAR|PTP38A|Ptp38A|dlar|lar	Leukocyte-antigen-related-like	protein-coding
1844	chr2L	14045441	14045900	+	0	NA	intron (NM_001259098, intron 2 of 13)	CpG	-1912	NM_135854	34824	Dm.33504	NM_135854		NimC4	BG:DS05899.3|CG16876|CT35247|Dmel\CG16876|nimC4|simu	Nimrod C4	protein-coding
7049	chr3L	8032901	8033270	+	0	NA	intron (NM_001274626, intron 3 of 8)	intron (NM_001274626, intron 3 of 8)	-22716	NR_133188	26067195		NR_133188		CR45867	Dmel\CR45867	ncRNA	ncRNA
12390	chr3R	24110561	24111490	+	0	NA	exon (NM_142957, exon 1 of 3)	exon (NM_142957, exon 1 of 3)	1364	NM_142957	42858	Dm.11197	NM_142957		CG13605	Dmel\CG13605	uncharacterized protein	protein-coding
9996	chr3R	6645741	6645990	+	0	NA	Intergenic	Intergenic	-1024	NM_001170061	40813	Dm.7380	NM_057608		Taf1	BG:DS00004.13|CG17603|Dmel\CG17603|EfW1|SR3-5|TAF|TAF1|TAF200|TAF230|TAF250|TAF250/230|TAFII-250|TAFII250|TAF[II]250|TAF[[II]]|TAF[[II]]230|TAF[[II]]250|TAF[[II]]250/230|TFIID|TFIID TAF250|Taf1p|Taf200|Taf230|Taf250|Taf[[II]]250|cel|cell|d230|dTAF1|dTAF230|dTAF250|dTAFII250|dTAF[[II]]230|dTAF[[II]]250|dmTAF1|dmTAF[[II]]230|l(3)84Ab|p230	TBP-associated factor 1	protein-coding
7228	chr3L	9422281	9423670	+	0	NA	promoter-TSS (NM_079277)	promoter-TSS (NM_079277)	-278	NM_079277	39085	Dm.2900	NM_079277		aay	0423/14|24661601|CG3705|Dmel\CG3705|anon-WO0172774.117	astray	protein-coding
4056	chr2R	10667061	10667350	+	0	NA	Intergenic	CpG	5417	NR_133111	26067540		NR_133111		CR46229	Dmel\CR46229|lincRNA.280	ncRNA	ncRNA
4129	chr2R	11184431	11185070	+	0	NA	intron (NM_057375, intron 1 of 7)	(AC)n|Simple_repeat|Simple_repeat	1526	NM_057375	36171	Dm.4730	NM_057375		shn	BEST:SD06302|CG7734|Dmel\CG7734|EP(2)2359|EP2359|SD06302|SHN|Schnurri|Shn|l(2)04738|quo	schnurri	protein-coding
10049	chr3R	6849841	6850150	+	0	NA	promoter-TSS (NM_206443)	promoter-TSS (NM_206443)	-14	NM_206443	40833	Dm.2481	NM_079524		Scr	BG:DS07876.2|CG1030|DmScr|Dmel\CG1030|Msc|SCR|l(3)84Af|scr	Sex combs reduced	protein-coding
899	chr2L	6722811	6725490	+	0	NA	promoter-TSS (NM_001042876)	promoter-TSS (NM_001042876)	247	NM_001273224	249072	Dm.12197	NM_135223		Liprin-alpha	CG11199|DLiprin|DLiprin-alpha|Dliprin-alpha|Dmel\CG11199|LIP|LIP.1|LIP1|Liprin|lip-alpha|lpr|oos	Liprin-alpha	protein-coding
10600	chr3R	10590651	10591210	+	0	NA	intron (NM_057228, intron 5 of 13)	(AT)n|Simple_repeat|Simple_repeat	23346	NM_057229	41273	Dm.2272	NM_057228		hth	1323/07|1422/04|CG17117|Dm-HTH|Dmel\CG17117|HTH|Hth|Meis1|P53|anon-EST:Liang-2.13|clone 2.13|dtl|hth1|hth2|l(3)05745|l(3)86Ca	homothorax	protein-coding
11895	chr3R	20654681	20655210	+	0	NA	exon (NM_169912, exon 2 of 5)	exon (NM_169912, exon 2 of 5)	1897	NM_142647	42449	Dm.1264	NM_142647		Nep4	CG4058|DmeNEP4|Dmel\CG4058|NEP4|dNEP4|nep4	Neprilysin 4	protein-coding
12507	chr3R	25049331	25050690	+	0	NA	promoter-TSS (NM_001104437)	promoter-TSS (NM_001104437)	-233	NM_143070	43000	Dm.1326	NM_143070		CG11791	Dmel\CG11791	uncharacterized protein	protein-coding
1466	chr2L	10835111	10835470	+	0	NA	intron (NM_078817, intron 1 of 18)	intron (NM_078817, intron 1 of 18)	2221	NM_001032069	34495	Dm.2707	NM_078817		Nos	CG6713|DNOS|DNOS1|Dmel\CG6713|NOS|dNOS|dNos|drNOSoxy|nNOS|nos	Nitric oxide synthase	protein-coding
8454	chr3L	18186691	18187430	+	0	NA	Intergenic	Intergenic	-1419	NM_001275081	40009	Dm.5624	NM_079412		hid	CG5123|Dmel\CG5123|HID|Hid|Hid1|W|hid1|his|l(3)05014	head involution defective	protein-coding
12232	chr3R	22934281	22934570	+	0	NA	intron (NM_079730, intron 2 of 10)	intron (NM_079730, intron 2 of 10)	5832	NR_133436	26067405		NR_133436		CR46088	Dmel\CR46088	ncRNA	ncRNA
10209	chr3R	8098311	8098620	+	0	NA	intron (NM_001104237, intron 1 of 4)	TRANSPAC_I-int|LTR|Gypsy	4341	NM_001104237	40957	Dm.24036	NM_001104237		CG7900	Dmel\CG7900	CG7900	protein-coding
16274	chrX	20658361	20658800	+	0	NA	promoter-TSS (NR_123968)	promoter-TSS (NR_123968)	-902	NR_123968	19836007		NR_123968		CR45466	Dmel\CR45466	ncRNA	ncRNA
15084	chrX	11320881	11321180	+	0	NA	TTS (NM_078561)	TTS (NM_078561)	1327	NM_078561	32068		NM_078561		sisA	CG1641|DM29|Dmel\CG1641|sis A|sis a|sis-A|sis-a|sisa	sisterless A	protein-coding
14052	chrX	3161491	3161850	+	0	NA	intron (NM_001258581, intron 5 of 8)	intron (NM_001258581, intron 5 of 8)	11470	NM_144464	59253	Dm.5987	NM_144464		CG18508	CG4015|Dmel\CG18508|EG:140G11.3	uncharacterized protein	protein-coding
11551	chr3R	17710541	17711650	+	0	NA	intron (NM_001275751, intron 2 of 14)	A-rich|Low_complexity|Low_complexity	7255	NM_001170168	42130	Dm.2989	NM_079668		osa	C819|CG7467|Dmel\CG7467|E(E2F)3C|OSA|Osa|anon-WO0118547.314|anon-WO0172774.126|eld|en(lz)4F/4H|eyelid|l(3)00090|l(3)04539|l(3)j9C3|p300	osa	protein-coding
11602	chr3R	18151811	18152080	+	0	NA	promoter-TSS (NM_142419)	promoter-TSS (NM_142419)	-175	NM_142419	42163	Dm.20208	NM_142419		CG14316	Dmel\CG14316	uncharacterized protein	protein-coding
692	chr2L	5319851	5320250	+	0	NA	exon (NM_001103618, exon 4 of 6)	exon (NM_001103618, exon 4 of 6)	-5155	NM_135076	33760	Dm.4604	NM_135076		CG14024	Dmel\CG14024|d4ST1	uncharacterized protein	protein-coding
8002	chr3L	15122811	15123190	+	0	NA	TTS (NM_168609)	TTS (NM_168609)	1428	NM_168609	318245	Dm.34005	NM_168609		CG32847	Dmel\CG32847	uncharacterized protein	protein-coding
12350	chr3R	23867081	23867350	+	0	NA	intron (NM_079742, intron 2 of 9)	intron (NM_079742, intron 2 of 9)	-7585	NR_002077	3772474	Dm.38258	NR_002077		snRNA:U1:95Cb	95C U1|CR32866|Dmel\CR32866|K5|U1|U1 snRNA|U1-95.2|U1-95Cb|U1:95C|U1:95Cb|U1a-95Cb|U1snRNA|U1snRNA95Cb|snRNA-U1-95.2|snRNA:U1|snRNA:U1:95CB	small nuclear RNA U1 at 95Cb	ncRNA
7530	chr3L	11822731	11823180	+	0	NA	promoter-TSS (NM_001043137)	promoter-TSS (NM_001043137)	-29	NR_003866	5740838	Dm.38304	NR_003866		snoRNA:Psi18S-920	CR34641|Dmel\CR34641|Psi 18S-920|psi18S-920	ncRNA	ncRNA
15336	chrX	13240041	13240300	+	0	NA	intron (NM_167354, intron 1 of 8)	intron (NM_167354, intron 1 of 8)	-3604	NM_167355	318134	Dm.34102	NM_167355		CG32639	Dmel\CG32639	uncharacterized protein	protein-coding
6330	chr3L	1580951	1581230	+	0	NA	intron (NM_139371, intron 1 of 4)	intron (NM_139371, intron 1 of 4)	4391	NM_139371	38186	Dm.9421	NM_139371		CG13917	Dmel\CG13917	uncharacterized protein	protein-coding
15815	chrX	17299561	17299890	+	0	NA	intron (NM_167564, intron 1 of 5)	intron (NM_167564, intron 1 of 5)	896	NM_167564	32721	Dm.2171	NM_078661		Fim	CG8649|Dmel\CG8649|FIM|fim	Fimbrin	protein-coding
8979	chr3L	22089271	22089620	+	0	NA	Intergenic	Intergenic	6637	NM_080120	45962	Dm.1780	NM_080120		msopa	CG14560|Dmel\CG14560	male-specific opa containing gene	protein-coding
2250	chr2L	17750811	17751530	+	0	NA	intron (NM_165227, intron 3 of 23)	intron (NM_165227, intron 3 of 23)	1176	NM_001032106	35070	Dm.5768	NM_165224		CadN	B|CG7100|CT21941|Cad-N|D-cad|DN|DN-CAD|DN-CAd|DN-Cad|DN-cad|DNCad|DNcad|Dmel\CG7100|N-Cad|N-Cadh|N-cad|N-cadherin|NCAD|NCad|Ncad|S(DmcycE[JP])2.12|anon-EST:CL32|cad1|cadN|l(2)36Da|l(2)Bld|n-cad|ncad	Cadherin-N	protein-coding
802	chr2L	6099931	6100350	+	0	NA	promoter-TSS (NM_001273193)	promoter-TSS (NM_001273193)	-237	NM_001273193	33863	Dm.3380	NM_164682		stai	BEST:LD33989|CG31641|CG5981|D-stat|Dmel\CG31641|LD33989|SCG10-like|rdt|rdtp	stathmin	protein-coding
8440	chr3L	18088101	18088480	+	0	NA	promoter-TSS (NM_001104166)	promoter-TSS (NM_001104166)	-970	NM_001104166	5740501	Dm.20883	NM_001104166		CG34253	CG32194|Dmel\CG34253	uncharacterized protein	protein-coding
7030	chr3L	7916431	7916760	+	0	NA	TTS (NM_168244)	TTS (NM_168244)	1158	NM_168244	317997	Dm.6894	NM_168244		CG32368	BcDNA:RH61042|Dmel\CG32368	uncharacterized protein	protein-coding
4856	chr2R	16129121	16129380	+	0	NA	intron (NM_080084, intron 1 of 8)	intron (NM_080084, intron 1 of 8)	4269	NM_166144	45380	Dm.3446	NM_080084		spin	25/11|CG8428|Dmel\CG8428|Spin|bnch|l(2)10403|l(2)W5|l(2)k02511|l(2)k09905|l(2R)W5	spinster	protein-coding
544	chr2L	4335621	4336270	+	0	NA	intron (NM_078747, intron 1 of 6)	intron (NM_078747, intron 1 of 6)	2032	NM_078747	33636	Dm.2602	NM_078747		Atet	CG2969|Dmel\CG2969	ABC transporter expressed in trachea	protein-coding
15675	chrX	16231181	16231600	+	0	NA	Intergenic	Intergenic	-14640	NM_078638	32579	Dm.175	NM_078638		disco	CG9908|DISCO|Disco|Dmel\CG9908|disc	disconnected	protein-coding
10964	chr3R	13665311	13665770	+	0	NA	intron (NM_176488, intron 6 of 8)	intron (NM_176488, intron 6 of 8)	3952	NM_176489	41670	Dm.2188	NM_176488		B52	B52/SRp55|B52/dSRp55|CG10851|Dmel\CG10851|E(Dfd)|E726|MabB52|RRM8|RSp55|Rbp8|SR55|SRp55|dSRp55|l(3)s2249|rrm8	B52	protein-coding
11160	chr3R	15208871	15209570	+	0	NA	promoter-TSS (NM_142171)	promoter-TSS (NM_142171)	16	NM_142171	41830	Dm.2076	NM_142171		Mau2	CG4203|Dmel\CG4203|FBgn0038300|MAU-2|MAU2|Mau-2	Mau2 sister chromatid cohesion factor	protein-coding
3276	chr2R	5292461	5292830	+	0	NA	intron (NM_165425, intron 3 of 5)	intron (NM_165425, intron 3 of 5)	-1418	NM_001273778	35485	Dm.487	NM_136319		d4	CG2682|D4|Dd4|Dmel\CG2682|dd4	d4	protein-coding
8937	chr3L	21765651	21766220	+	0	NA	intron (NM_079481, intron 1 of 7)	intron (NM_079481, intron 1 of 7)	-1294	NR_133297	26067284		NR_133297		CR45957	Dmel\CR45957	ncRNA	ncRNA
7526	chr3L	11807801	11808070	+	0	NA	exon (NM_168477, exon 9 of 17)	exon (NM_168477, exon 9 of 17)	6820	NM_168477	39334	Dm.15377	NM_168477		CG42255	CG32092|CG32094|CG5956|CT18701|Dmel\CG42255|Dmel_CG32092|Dmel_CG32094	uncharacterized protein	protein-coding
244	chr2L	1645971	1646240	+	0	NA	TTS (NR_124022)	TTS (NR_124022)	1058	NR_124022	19835756		NR_124022		CR45695	Dmel\CR45695	ncRNA	ncRNA
12619	chr3R	25888041	25889370	+	0	NA	TTS (NM_001170270)	TTS (NM_001170270)	163	NM_170247	43130	Dm.7043	NM_143181		Lnk	CG 17367|CG17367|CG5908|Dmel\CG17367|LNK|dSH2B|lnk	Lnk	protein-coding
7888	chr3L	14451651	14453480	+	0	NA	intron (NM_001259826, intron 4 of 8)	intron (NM_001259826, intron 4 of 8)	-3992	NM_140447	39583	Dm.13627	NM_140447		bbg	BBG|C96|CG42230|CG9587|CG9598|Dmel\CG42230|Dmel_CG9587|Dmel_CG9598	big bang	protein-coding
12045	chr3R	21570561	21570830	+	0	NA	3' UTR (NM_001144623, exon 12 of 12)	3' UTR (NM_001144623, exon 12 of 12)	-1546	NM_142717	42548	Dm.12947	NM_142717		CG15498	Dmel\CG15498	uncharacterized protein	protein-coding
4481	chr2R	13349351	13349890	+	0	NA	Intergenic	Intergenic	-4812	NR_133116	19835403		NR_133116		CR44206	CG44206|Dmel\CR44206|pri-mir-184	ncRNA	ncRNA
11210	chr3R	15481761	15482240	+	0	NA	promoter-TSS (NM_142213)	promoter-TSS (NM_142213)	94	NM_142213	41888	Dm.16845	NM_142213		B9d1	B9D1|CG14870|Dmel\CG14870	B9d1	protein-coding
10816	chr3R	12320991	12321550	+	0	NA	Intergenic	Intergenic	-2251	NM_141918	41494	Dm.16964	NM_141918		CG10013	Dmel\CG10013	uncharacterized protein	protein-coding
12998	chr3R	29664621	29665060	+	0	NA	promoter-TSS (NM_143447)	promoter-TSS (NM_143447)	61	NM_143447	43485	Dm.16325	NM_143447		ppk21	CG12048|Dmel\CG12048|PPK21|Ppk21	pickpocket 21	protein-coding
14265	chrX	4702851	4703340	+	0	NA	intron (NM_131953, intron 2 of 4)	intron (NM_131953, intron 2 of 4)	770	NM_167017	31406	Dm.11312	NM_131953		l(1)G0334	CG 7010|CG7010|Dmel\CG7010|E1-PDH|L(1)G0334|L(1)g0334|PDH|PDHE1|Pdh|l (1) G0334|pdha	lethal (1) G0334	protein-coding
1041	chr2L	7636771	7637290	+	0	NA	promoter-TSS (NR_124135)	promoter-TSS (NR_124135)	79	NR_124135	19835768		NR_124135		CR44800	Dmel\CR44800|lincRNA.71	ncRNA	ncRNA
9219	chr3L	24535821	24536540	+	0	NA	Intergenic	Intergenic	-1056	NM_001043187	3355089	Dm.1580	NM_001043186		mRpS5	BcDNA:RE47909|CG40049|Dmel\CG40049|MRP-S5|MrpS5	mitochondrial ribosomal protein S5	protein-coding
6698	chr3L	4469741	4471000	+	0	NA	exon (NM_168088, exon 2 of 2)	exon (NM_168088, exon 2 of 2)	369	NM_168088	317939	Dm.15673	NM_168088		CG32249	Dmel\CG32249	uncharacterized protein	protein-coding
6097	chr3L	133101	133370	+	0	NA	intron (NM_167789, intron 1 of 5)	(T)n|Simple_repeat|Simple_repeat	502	NM_167789	38017	Dm.7033	NM_080382		Pdk1	1210|CG1201|CG1210|DSTPK61|Dmel\CG1210|Dstpk61|PDK|PDK-1|PDK1|PDK1/Pk61C|PK61C|Pk61C|Pk61C/PDK1|Pk61C|PDK1|Pk61c/PDK1|dPDK|dPDK-1|dPDK1|dSTPK61|pdk1|pk61c	Phosphoinositide-dependent kinase 1	protein-coding
6005	chr2R	24943991	24944320	+	0	NA	promoter-TSS (NM_138141)	promoter-TSS (NM_138141)	445	NM_138140	37990	Dm.7976	NM_138140		CG15861	Dmel\CG15861|R5_2R:20832201..20832579	uncharacterized protein	protein-coding
4494	chr2R	13481901	13483710	+	0	NA	TTS (NM_137032)	TTS (NM_137032)	424	NM_079998	44279	Dm.1842	NM_079998		arr	Arr|BEST:CK00539|CG5912|CK00539|CT15575|Dm Arr|Dmel\CG5912|Irp6|LRP|LRP/Arr|LRP5/6|LRP6|l(2)k08131	arrow	protein-coding
12230	chr3R	22927721	22928450	+	0	NA	promoter-TSS (NR_133436)	promoter-TSS (NR_133436)	-508	NR_133436	26067405		NR_133436		CR46088	Dmel\CR46088	ncRNA	ncRNA
2089	chr2L	16266181	16266520	+	0	NA	exon (NM_057257, exon 3 of 3)	exon (NM_057257, exon 3 of 3)	4209	NM_135938	34955	Dm.12032	NM_135938		CG4935	BG:DS02740.2|Dmel\CG4935|MET30	CG4935	protein-coding
1708	chr2L	12832611	12833180	+	0	NA	Intergenic	Intergenic	-8000	NR_124225	19835536		NR_124225		CR44970	Dmel\CR44970	ncRNA	ncRNA
848	chr2L	6413671	6414210	+	0	NA	exon (NM_135181, exon 3 of 3)	exon (NM_135181, exon 3 of 3)	1625	NM_135181	33895	Dm.23851	NM_135181		CG13982	Dmel\CG13982	uncharacterized protein	protein-coding
487	chr2L	3815851	3816630	+	0	NA	TTS (NR_073713)	TTS (NR_073713)	802	NR_073713	14462689		NR_073713		CR44076	Dmel\CR44076	ncRNA	ncRNA
12964	chr3R	29433251	29433550	+	0	NA	intron (NM_143434, intron 8 of 18)	intron (NM_143434, intron 8 of 18)	-24170	NM_170409	43469	Dm.4029	NM_057468		Ptp99A	CG11515|CG11516|CG11517|CG2005|CT6383|DPTP99A|DPTP[[99A]]|Dmel\CG11516|PTP99A|R-PTP 99A|dptp99A|ptp99A	Protein tyrosine phosphatase 99A	protein-coding
7611	chr3L	12504051	12505220	+	0	NA	promoter-TSS (NM_140324)	promoter-TSS (NM_140324)	343	NM_140325	44118	Dm.3505	NM_140325		vih	1105/01|CG10682|Dmel\CG10682|UbcH10|anon-WO0172774.54|anon-WO0172774.55|anon-WO0172774.56|l(3)S110501	vihar	protein-coding
12220	chr3R	22880261	22880960	+	0	NA	Intergenic	Intergenic	-18674	NM_079730	42707	Dm.1287	NM_079730		klg	CG6669|CT20712|Dmel\CG6669|Klg|h214|l(3)rN712	klingon	protein-coding
15152	chrX	11713401	11717700	+	0	NA	promoter-TSS (NM_001201653)	promoter-TSS (NM_001201653)	15	NM_001272530	32123	Dm.19556	NM_132513		Amun	CG2446|Dmel\CG2446|EP1503|amun|anon-WO03040301.104|anon-WO03040301.105|anon-WO03040301.107	amun	protein-coding
1547	chr2L	11393991	11394260	+	0	NA	Intergenic	Intergenic	-1805	NR_124197	19835611		NR_124197		CR43681	CG43681|Dm_2L:52920|Dmel\CR43681|lincRNA.108	ncRNA	ncRNA
1059	chr2L	7850211	7850770	+	0	NA	exon (NM_135312, exon 4 of 7)	exon (NM_135312, exon 4 of 7)	4765	NM_135312	34073	Dm.26755	NM_135312		CG14535	DmKIF26|Dmel\CG14535|KIF26|KIF26A/B	uncharacterized protein	protein-coding
9817	chr3R	5179241	5179490	+	0	NA	exon (NM_169026, exon 16 of 16)	exon (NM_169026, exon 16 of 16)	14139	NM_001043212	40619		NM_001043212		dpr16	CG12591|CT34444|Dmel\CG12591|Dpr-16|Dpr16|mdcds_51595	defective proboscis extension response 16	protein-coding
4590	chr2R	14139901	14140980	+	0	NA	5' UTR (NM_137081, exon 1 of 12)	5' UTR (NM_137081, exon 1 of 12)	462	NM_001259386	50225	Dm.19025	NM_137081		Prosap	BcDNA:GH23107|CG13354|CG30483|CG8122|D-ProSAP|Dmel\CG30483|ProSAP|Shank|anon-WO0118547.149|prosap	prosap	protein-coding
7341	chr3L	10514611	10515130	+	0	NA	intron (NM_001259778, intron 2 of 16)	(CTG)n|Simple_repeat|Simple_repeat	-1133	NM_168413	39198	Dm.5024	NM_168412		Rbfox1	A2BP1|A2bp1|BcDNA:GM06073|CG14155|CG18441|CG32062|Dmel\CG32062|cg18441|dA2BP1	RNA-binding Fox protein 1	protein-coding
29	chr2L	114281	114710	+	0	NA	promoter-TSS (NM_001272864)	promoter-TSS (NM_001272864)	-231	NM_001258886	33179	Dm.21236	NM_164371		ND-15	CG11455|Dmel\CG11455|NIPM	NADH dehydrogenase (ubiquinone) 15 kDa subunit	protein-coding
10597	chr3R	10582241	10582700	+	0	NA	TTS (NM_001014613)	TTS (NM_001014613)	31806	NM_057229	41273	Dm.2272	NM_057228		hth	1323/07|1422/04|CG17117|Dm-HTH|Dmel\CG17117|HTH|Hth|Meis1|P53|anon-EST:Liang-2.13|clone 2.13|dtl|hth1|hth2|l(3)05745|l(3)86Ca	homothorax	protein-coding
8389	chr3L	17632641	17632960	+	0	NA	promoter-TSS (NM_140742)	promoter-TSS (NM_140742)	517	NR_124973	19835426		NR_124973		CR44567	Dmel\CR44567	ncRNA	ncRNA
5129	chr2R	18235101	18235960	+	0	NA	exon (NM_058135, exon 1 of 1)	exon (NM_058135, exon 1 of 1)	2769	NM_058135	37089	Dm.4763	NM_058135		fj	CG10917|Dmel\CG10917|Fj	four-jointed	protein-coding
8839	chr3L	21157811	21158330	+	0	NA	intron (NM_001275210, intron 2 of 23)	intron (NM_001275210, intron 2 of 23)	-7427	NM_001275208	40333	Dm.2507	NM_079470		Ac78C	AC 78C|AC78C|CG10554|CG10564|DAC78C|DAC78C-s|Dmel\CG10564	Adenylyl cyclase 78C	protein-coding
11254	chr3R	15853331	15854000	+	0	NA	promoter-TSS (NM_169676)	promoter-TSS (NM_169676)	-84	NM_169676	41921	Dm.10917	NM_169676		cv-d	CG31150|CG9622|CG9625|CG9627|Cv-d|Dmel\CG31150	crossveinless d	protein-coding
14646	chrX	7728731	7729080	+	0	NA	promoter-TSS (NM_132174)	promoter-TSS (NM_132174)	150	NM_132175	31682	Dm.95	NM_132175		CG12155	Dmel\CG12155	uncharacterized protein	protein-coding
13655	chrX	487421	488010	+	0	NA	promoter-TSS (NM_130488)	promoter-TSS (NM_130488)	-134	NM_130487	30991	Dm.13960	NM_130487		CG18273	CG13372|Dmel\CG18273|EG:171D11.6	uncharacterized protein	protein-coding
8381	chr3L	17555621	17558080	+	0	NA	exon (NM_079403, exon 1 of 4)	exon (NM_079403, exon 1 of 4)	938	NM_001275063	39961	Dm.20508	NM_079403		CycT	CG6292|Dmcyclin T|Dmel\CG6292|ORE-14|P-TEFb|anon-74EFc|dT|p124	Cyclin T	protein-coding
8263	chr3L	16709611	16712790	+	0	NA	promoter-TSS (NM_001275038)	promoter-TSS (NM_001275038)	477	NM_140655	39864	Dm.15215	NM_140655		Lasp	CG3849|Dmel\CG3849|anon-73Bd|cDNA B|lasp	lasp	protein-coding
145	chr2L	819411	820170	+	0	NA	promoter-TSS (NM_134704)	promoter-TSS (NM_134704)	-174	NM_057808	33259	Dm.4233	NM_057808		Clp	CG3642|CLP|CPSF30|Cpsf30|Dmel\CG3642|Ssb-c6a|c6a|clp	Clipper	protein-coding
3573	chr2R	7458671	7459370	+	0	NA	promoter-TSS (NM_058057)	promoter-TSS (NM_058057)	-146	NM_058057	35671	Dm.3378	NM_058057		Inos	CG11143|Dmel\CG11143|INOS|bs36h12.y1	inos	protein-coding
13378	chr4	204851	206310	+	0	NA	intron (NM_166742, intron 1 of 4)	intron (NM_166742, intron 1 of 4)	365	NM_166742	43774	Dm.33081	NM_166742		CG31998	CG11572|CG11578|Dmel\CG31998	uncharacterized protein	protein-coding
12630	chr3R	26000681	26002080	+	0	NA	TTS (NM_079780)	TTS (NM_079780)	179	NR_125261	19836099		NR_125261		CR45037	Dmel\CR45037	ncRNA	ncRNA
5522	chr2R	21238191	21238560	+	0	NA	intron (NM_137721, intron 2 of 7)	intron (NM_137721, intron 2 of 7)	12584	NM_137721	37422	Dm.15759	NM_137721		ASPP	CG18375|Dmel\CG18375|dASPP	Ankyrin-repeat, SH3-domain, and Proline-rich-region containing Protein	protein-coding
76	chr2L	386391	386650	+	0	NA	exon (NM_164382, exon 4 of 5)	exon (NM_164382, exon 4 of 5)	8408	NM_164382	33208	Dm.6423	NM_164382		al	A1|AL|Al|CG3935|Dmel\CG3935|L13-4|lambda13-4	aristaless	protein-coding
6843	chr3L	5966831	5967300	+	0	NA	TTS (NM_139749)	TTS (NM_139749)	8942	NM_001274529	38674	Dm.860	NM_139749		CG10479	Dmel\CG10479	uncharacterized protein	protein-coding
10028	chr3R	6765321	6765610	+	0	NA	promoter-TSS (NR_125087)	promoter-TSS (NR_125087)	-20	NR_125087	19834915		NR_125087		CR44930	Dmel\CR44930|lincRNA.697	ncRNA	ncRNA
9457	chr3R	1033641	1033890	+	0	NA	intron (NM_001316563, intron 6 of 21)	IDEFIX_I-int|LTR|Gypsy	332836	NR_133317	26067439		NR_133317		CR46123	Dmel\CR46123	ncRNA	ncRNA
7392	chr3L	10885881	10886240	+	0	NA	promoter-TSS (NM_168424)	promoter-TSS (NM_168424)	-10	NM_168424	39222	Dm.3180	NM_140160		CG6404	BcDNA:GH02220|Dmel\CG6404|OXA1	CG6404	protein-coding
9358	chr3L	27298731	27298990	+	0	NA	intron (NM_001276239, intron 4 of 10)	intron (NM_001276239, intron 4 of 10)	19544	NM_001015152	3354919	Dm.20297	NM_001015151		Dbp80	BcDNA:RE44177|CG17023|DBP80|DmDbp80|Dmel\CG17023|HEL80|Hel40|Hel80|hel-40|mdcds_36124	Dead box protein 80	protein-coding
3765	chr2R	8906711	8907970	+	0	NA	promoter-TSS (NM_136577)	promoter-TSS (NM_136577)	-178	NM_136577	35885	Dm.30897	NM_136577		CG30349	CG13750|CG2396|Dmel\CG30349	uncharacterized protein	protein-coding
15184	chrX	11940311	11940610	+	0	NA	intron (NM_001258708, intron 25 of 29)	intron (NM_001258708, intron 25 of 29)	-9610	NM_132543	32157	Dm.11848	NM_132543		CG10362	Dmel\CG10362	uncharacterized protein	protein-coding
15304	chrX	12929961	12930590	+	0	NA	intron (NM_001258719, intron 2 of 6)	intron (NM_001258719, intron 2 of 6)	-8242	NM_001103495	32245	Dm.3314	NM_132614		fne	BEST:HL02010|BcDNA:HL02010|BcDNA:RE25290|CG4396|CR32646|Dmel\CG4396|Dmel_CR32646|FNE|Fne|MRE28|cg4396|lincRNA.985	found in neurons	protein-coding
4689	chr2R	14927771	14928630	+	0	NA	5' UTR (NM_001202004, exon 1 of 12)	5' UTR (NM_001202004, exon 1 of 12)	225	NM_001202004	36668	Dm.3168	NM_137161		Kank	BEST:GH19041|BcDNA:GH03482|CG10249|Dmel\CG10249|dKank|kank	kank	protein-coding
8399	chr3L	17683671	17684010	+	0	NA	TTS (NM_001104164)	TTS (NM_001104164)	-6175	NM_168744	39972	Dm.15189	NM_168744		Ccn	CG13735|CG13736|CG32183|Dmel\CG32183|dCCN	Ccn	protein-coding
14304	chrX	5143221	5143870	+	0	NA	intron (NM_001297950, intron 2 of 30)	(CA)n|Simple_repeat|Simple_repeat	11647	NM_131977	31433	Dm.33761	NM_131977		Rpn13R	CG6789|Dmel\CG6789	Regulatory particle non-ATPase 13-related	protein-coding
14555	chrX	7095761	7098390	+	0	NA	promoter-TSS (NM_167115)	promoter-TSS (NM_167115)	-9	NM_167113	3772180	Dm.4502	NM_080052		Sxl	CG14425|CG14425/CG18350|CG18350|CG33070|CG43770|DmSxl|Dmel\CG43770|Dmel_CG14425|Dmel_CG18350|Fl|Mex156|ORF2|SXL|Su(da)|Sx1|SxL|Sxl-1 Sxl-2|SxlPe|SxlPm|dSXL|fs(1)K1274|fs(1)M106|l(1)6Fa|melSxl|sxl	Sex lethal	protein-coding
13155	chr3R	30749981	30751230	+	0	NA	Intergenic	Intergenic	-3433	NR_048515	12798049		NR_048515		CR43238	448-26|516|572|Dmel\CR43238|chr3R:26	ncRNA	ncRNA
11813	chr3R	19904631	19905660	+	0	NA	promoter-TSS (NM_142587)	promoter-TSS (NM_142587)	-19	NM_142587	42371	Dm.12939	NM_142587		RhoGAP92B	CG4755|Dmel\CG4755|dRich|drich	Rho GTPase activating protein at 92B	protein-coding
12982	chr3R	29544901	29545780	+	0	NA	Intergenic	Intergenic	10704	NR_048512	12798296		NR_048512		CR43613	Dmel\CR43613|lincRNA.892	ncRNA	ncRNA
7091	chr3L	8405131	8405760	+	0	NA	promoter-TSS (NM_176299)	promoter-TSS (NM_176299)	-9	NM_168274	38956	Dm.889	NM_139963		CG13667	Dmel\CG13667	uncharacterized protein	protein-coding
8016	chr3L	15172671	15174310	+	0	NA	Intergenic	Intergenic	-9862	NM_140501	39657	Dm.20085	NM_140501		CG7011	Dmel\CG7011	CG7011	protein-coding
2144	chr2L	16546931	16547290	+	0	NA	intron (NM_001144357, intron 1 of 4)	intron (NM_001144357, intron 1 of 4)	2094	NM_001144357	34987	Dm.11210	NM_135957		CG42389	CG13260|CG13261|CG31738|CG4668|CT15043|CT15049|Dmel\CG42389|Dmel_CG13260|Dmel_CG31738|anon-EST:Liang-1.16|clone 1.16	uncharacterized protein	protein-coding
10191	chr3R	7964591	7965140	+	0	NA	intron (NM_001275424, intron 1 of 4)	intron (NM_001275424, intron 1 of 4)	-2079	NM_079548	40940	Dm.3308	NM_079548		dsx	CG11094|DSX|Dmdsx|Dmel\CG11094|Dsx|Hr|dsxF|dsxM|ix-62c	doublesex	protein-coding
16443	chrX	22947011	22947320	+	0	NA	TTS (NM_001042844)	TTS (NM_001042844)	1844	NM_001042844	3355167	Dm.30188	NM_001042844		CG41106	Dmel\CG41106	uncharacterized protein	protein-coding
14669	chrX	7935521	7936580	+	0	NA	TTS (NM_080427)	TTS (NM_080427)	154	NM_001272389	31713	Dm.18600	NM_132200		Ubr3	CG1530|CG1531|CG42593|Dmel\CG42593|Dmel_CG1530|Dmel_CG1531|ubr3	Ubr3 ubiquitin ligase	protein-coding
8463	chr3L	18235361	18235630	+	0	NA	promoter-TSS (NR_133264)	promoter-TSS (NR_133264)	-735	NR_133264	26067264		NR_133264		CR45937	Dmel\CR45937|lincRNA.600	ncRNA	ncRNA
3781	chr2R	8994691	8995270	+	0	NA	intron (NM_001259284, intron 5 of 8)	intron (NM_001259284, intron 5 of 8)	-9080	NM_001299292	35902	Dm.537	NM_136591		CG8213	Dmel\CG8213|SP44|c-SP44	CG8213	protein-coding
6137	chr3L	320891	321990	+	0	NA	intron (NM_138184, intron 5 of 5)	intron (NM_138184, intron 5 of 5)	-1556	NM_167826	45374	Dm.1632	NM_080083		fwd	CG7004|Dmel\CG7004|Fwd|PI4K|anon-WO0118547.259	four wheel drive	protein-coding
5950	chr2R	24520021	24520470	+	0	NA	exon (NM_001144285, exon 1 of 1)	exon (NM_001144285, exon 1 of 1)	822	NM_001144285	7354402	Dm.37108	NM_001144285		Ir60d	CG13582|CG42291|DmelIR60d|Dmel\CG42291|Dmel_CG13582|IR60d	Ionotropic receptor 60d	protein-coding
7181	chr3L	9028831	9029720	+	0	NA	Intergenic	CpG	-10029	NM_140025	39038	Dm.5197	NM_140025		Doc2	CG5187|Dm-DOC2|Dmel\CG5187|Doc|doc2	Dorsocross2	protein-coding
2672	chr2L	21107421	21108400	+	0	NA	promoter-TSS (NR_073818)	promoter-TSS (NR_073818)	129	NM_001144378	35376	Dm.21362	NM_136244		Nhe2	CG9255|CG9256|DmNHE2|Dmel\CG9256|Dnhe2|NHE2|nhe2	Na[+]/H[+] hydrogen exchanger 2	protein-coding
4222	chr2R	11690831	11691950	+	0	NA	promoter-TSS (NM_165847)	promoter-TSS (NM_165847)	105	NM_001299390	36253	Dm.14697	NM_136852		CG13197	BcDNA:RE27552|Dmel\CG13197	uncharacterized protein	protein-coding
15604	chrX	15774321	15774570	+	0	NA	exon (NM_176739, exon 4 of 11)	exon (NM_176739, exon 4 of 11)	1274	NM_176739	318910	Dm.21086	NM_176739		CG43672	CG33173|CG8473|Dmel\CG43672|Dmel_CG33173	uncharacterized protein	protein-coding
7645	chr3L	12672741	12673370	+	0	NA	Intergenic	Intergenic	11229	NR_124910	19834958		NR_124910		CR44552	Dmel\CR44552	ncRNA	ncRNA
1958	chr2L	15010551	15010960	+	0	NA	exon (NM_078844, exon 1 of 2)	exon (NM_078844, exon 1 of 2)	816	NM_078844	34877	Dm.6528	NM_078844		l(2)35Bd	BG:DS00929.5|C2|CG3688|Dmel\CG3688|br9|l(2)10408|l(2)br9	lethal (2) 35Bd	protein-coding
13550	chr4	1008471	1008770	+	0	NA	TTS (NM_001272151)	TTS (NM_001272151)	18481	NM_079898	43832	Dm.1408	NM_079898		PlexA	BcDNA:GM05237|CG11081|D-Plex A|DPlexA|Dmel\CG11081|Plex1|PlexA1|lincRNA.927|plex|plex A|plexA	Plexin A	protein-coding
11778	chr3R	19655181	19655900	+	0	NA	exon (NM_169871, exon 2 of 5)	exon (NM_169871, exon 2 of 5)	925	NM_142567	42345	Dm.16703	NM_142567		CG6184	Dmel\CG6184	CG6184	protein-coding
4123	chr2R	11149631	11150240	+	0	NA	5' UTR (NM_136795, exon 1 of 2)	5' UTR (NM_136795, exon 1 of 2)	133	NM_136795	36170	Dm.561	NM_136795		CG12391	Dmel\CG12391|anon-WO0140519.201	uncharacterized protein	protein-coding
4116	chr2R	11090251	11091640	+	0	NA	intron (NM_001299374, intron 2 of 4)	intron (NM_001299374, intron 2 of 4)	-4100	NM_001259332	12798404		NM_001259332		CG43189	Dmel\CG43189	uncharacterized protein	protein-coding
2605	chr2L	20496381	20496970	+	0	NA	TTS (NM_001299175)	TTS (NM_001299175)	1645	NM_001299175	3885610		NM_001038840		CG34007	BP1020|Dmel\CG34007	uncharacterized protein	protein-coding
15174	chrX	11872231	11873140	+	0	NA	promoter-TSS (NM_001272538)	promoter-TSS (NM_001272538)	94	NM_132531	32145	Dm.31084	NM_132531		CG11802	Dmel\CG11802	uncharacterized protein	protein-coding
10230	chr3R	8190811	8191380	+	0	NA	Intergenic	Intergenic	6616	NR_048343	12798065		NR_048343		CR43302	Dmel\CR43302	ncRNA	ncRNA
15006	chrX	10585181	10585790	+	0	NA	promoter-TSS (NM_001272489)	promoter-TSS (NM_001272489)	-63	NM_001272486	31987	Dm.18586	NM_176723		spri	CG12638|CG15297|CG15298|CG15299|CG15300|CG15301|CG32674|CG32680|CG33175|CG34414|Dmel\CG34414|Dmel_CG32680|Dmel_CG33175|Rin1|Spri|anon-WO03040301.275	sprint	protein-coding
10573	chr3R	10432351	10432820	+	0	NA	Intergenic	CpG	-2204	NM_141746	41272	Dm.24048	NM_141746		Cyp12e1	12e1|CG14680|Dmel\CG14680	Cyp12e1	protein-coding
3379	chr2R	6094401	6094680	+	0	NA	intron (NM_165461, intron 4 of 6)	intron (NM_165461, intron 4 of 6)	-8915	NM_001273790	35539	Dm.7281	NM_136359		Ars2	CG7843|Dmel\CG7843|anon-WO0118547.166	Arsenic resistance protein 2	protein-coding
1839	chr2L	14024241	14024930	+	0	NA	promoter-TSS (NR_124245)	promoter-TSS (NR_124245)	-486	NR_124245	19835558		NR_124245		CR31840	CG31840|Dmel\CR31840	ncRNA	ncRNA
8165	chr3L	16017211	16018210	+	0	NA	non-coding (NR_133246, exon 1 of 4)	non-coding (NR_133246, exon 1 of 4)	173	NR_133245	26067319		NR_133245		CR45998	Dmel\CR45998	ncRNA	ncRNA
14591	chrX	7296661	7297510	+	0	NA	intron (NM_167124, intron 2 of 6)	intron (NM_167124, intron 2 of 6)	-5787	NM_001298049	31664	Dm.93	NM_132161		unc-119	CG1659|DmUNC-119|Dmel\CG1659|Unc-119|Unc119|anon-EST:Posey123|dm unc-119	unc-119	protein-coding
9699	chr3R	4599641	4600030	+	0	NA	promoter-TSS (NR_125066)	promoter-TSS (NR_125066)	-86	NR_125066	19835543		NR_125065		CR44317	Dmel\CR44317|lincRNA.671	ncRNA	ncRNA
6701	chr3L	4513071	4513370	+	0	NA	exon (NM_079204, exon 3 of 6)	exon (NM_079204, exon 3 of 6)	-4787	NM_168092	38558	Dm.13596	NM_168090		NT1	CG18318|CG32242|CG32244|CG42576|CT30097|DNT1|Dmel\CG42576|Dmel_CG32242|Dmel_CG32244|Spz-2|Spz2|dNT1|spz2	Neurotrophin 1	protein-coding
7440	chr3L	11242901	11244810	+	0	NA	Intergenic	Intergenic	-3098	NR_124876	19835946		NR_124876		CR44713	Dmel\CR44713	ncRNA	ncRNA
11342	chr3R	16422961	16424050	+	0	NA	Intergenic	Intergenic	-4799	NR_125185	19835149		NR_125185		CR45631	Dmel\CR45631	ncRNA	ncRNA
6737	chr3L	4848671	4849190	+	0	NA	TTS (NM_168104)	TTS (NM_168104)	3531	NM_168104	38584	Dm.6094	NM_168104		CG32237	BcDNA:RE17910|CG13703|CG13706|Dmel\CG32237	uncharacterized protein	protein-coding
5538	chr2R	21366431	21368020	+	0	NA	intron (NM_080070, intron 1 of 6)	intron (NM_080070, intron 1 of 6)	12239	NM_080070	45280	Dm.1806	NM_080070		cv-2	BMPER|CG15671|CT35855|CV2|Cv 2|Cv-2|Cv2|Dmel\CG15671|cv 2	crossveinless 2	protein-coding
1943	chr2L	14835251	14836460	+	0	NA	Intergenic	Intergenic	6354	NR_073775	14462766		NR_073775		CR43805	Dmel\CR43805	ncRNA	ncRNA
1247	chr2L	9176981	9177270	+	0	NA	5' UTR (NM_001201819, exon 2 of 14)	5' UTR (NM_001201819, exon 2 of 14)	767	NM_001201818	34242	Dm.2669	NM_078797		tai	58/2|CG13109|CG18494|DAIB1|DmTaiman|Dmel\CG13109|EP(2)2630|NEST:bs13g05|TAI|Tai|bs13g05.y1|l(2)01351|l(2)k05802|l(2)k05809	taiman	protein-coding
6842	chr3L	5964131	5964540	+	0	NA	Intergenic	Intergenic	11672	NM_001274529	38674	Dm.860	NM_139749		CG10479	Dmel\CG10479	uncharacterized protein	protein-coding
12174	chr3R	22530491	22530900	+	0	NA	promoter-TSS (NM_176537)	promoter-TSS (NM_176537)	-123	NM_176537	326254	Dm.21163	NM_176537		CG33099	CG5340|Dmel\CG33099	uncharacterized protein	protein-coding
2644	chr2L	20925761	20926350	+	0	NA	promoter-TSS (NM_001273723)	promoter-TSS (NM_001273723)	92	NM_136233	35364	Dm.2209	NM_136233		RPA2	153194_at|CG9273|Dmel\CG9273|RpA2|dRPA2	Replication protein A2	protein-coding
2005	chr2L	15422571	15423620	+	0	NA	TTS (NM_057253)	TTS (NM_057253)	2485	NM_057253	34906		NM_057253		wor	BG:DS03023.1|CG4158|Dmel\CG4158|Wor|br35|l(2)35Da|l(2)br35|l35Da	worniu	protein-coding
11685	chr3R	18982601	18984450	+	0	NA	promoter-TSS (NM_001104364)	promoter-TSS (NM_001104364)	125	NM_142510	42274	Dm.6730	NM_142510		snRNP-U1-C	BcDNA:RH29440|C|CG5454|Dmel\CG5454|SmC|U1C|dU1-C|snRNP-U1|snRNPC	small ribonucleoprotein particle U1 subunit C	protein-coding
14201	chrX	4410871	4412120	+	0	NA	intron (NR_123790, intron 3 of 4)	(AC)n|Simple_repeat|Simple_repeat	-1361	NM_080331	31379	Dm.1683	NM_080331		bi	BI|CG3578|Dm-OMB|Dm-omb|Dmel\CG3578|OMB|Omb|Qd|T3|TBX2|dm-omb|l(1)bi|l(1)omb|omb	bifid	protein-coding
1971	chr2L	15089771	15090530	+	0	NA	intron (NM_001259105, intron 6 of 15)	intron (NM_001259105, intron 6 of 15)	15374	NM_001299023	34886	Dm.14345	NM_135894		CG15270	BG:DS04929.1|Dmel\CG15270	uncharacterized protein	protein-coding
1284	chr2L	9584941	9585740	+	0	NA	intron (NR_047927, intron 1 of 1)	intron (NR_047927, intron 1 of 1)	704	NR_047927	12798311		NR_047927		CR43621	Dmel\CR43621|lincRNA.92	ncRNA	ncRNA
10758	chr3R	11818701	11819800	+	0	NA	promoter-TSS (NM_001316557)	promoter-TSS (NM_001316557)	89	NM_141863	41431	Dm.4997	NM_141863		glo	110/46|CG6946|Dmel\CG6946|Glo|anon-WO0118547.328|cg6946|l(3)S011046|l(3)S11046|p67|p67-K	glorund	protein-coding
15009	chrX	10605911	10606390	+	0	NA	exon (NM_001144713, exon 8 of 9)	exon (NM_001144713, exon 8 of 9)	-3436	NM_132411	31990	Dm.7074	NM_132411		CG1628	Dmel\CG1628	CG1628	protein-coding
3719	chr2R	8394051	8394860	+	0	NA	intron (NM_001299264, intron 7 of 9)	intron (NM_001299264, intron 7 of 9)	7085	NM_136533	35813	Dm.13918	NM_136533		pdm3	BcDNA:AT16994|CG11641|CG14755|CG42698|Dmel\CG42698|Dmel_CG11641|Dmel_CG14755|Pdm3	pou domain motif 3	protein-coding
4967	chr2R	17004951	17005630	+	0	NA	promoter-TSS (NM_137334)	promoter-TSS (NM_137334)	-141	NM_137333	44748	Dm.660	NM_137333		NiPp1	CG8980|Dmel\CG8980|NIPP-1Dm|NIPP1|NIPP1Dm|NiPp-1|nipp1	Nuclear inhibitor of Protein phosphatase 1	protein-coding
10441	chr3R	9398981	9399530	+	0	NA	TTS (NM_001043225)	TTS (NM_001043225)	798	NM_001043225	4379851		NM_001043225		CG34117	Dmel\CG34117	uncharacterized protein	protein-coding
15015	chrX	10729961	10730420	+	0	NA	intron (NM_132420, intron 1 of 3)	(AGAG)n|Simple_repeat|Simple_repeat	-14312	NM_001272498	43873	Dm.6459	NM_079907		ras	CG11485|CG1799|Dmel\CG1799|EP(X)1093|IMPDH|IMPdH|LD02673|LD06825|Ras|l(1)9Eb|l(1)G0002|l(1)G0056|l(1)G0098|l(1)G0127|l(1)G0238|l(1)G0351|l(1)G0380|l(1)G0388|l(1)G0391|l(1)G0436|l(1)G0482|ras-l|raspberry/impd	raspberry	protein-coding
187	chr2L	1145131	1145860	+	0	NA	exon (NM_134728, exon 2 of 4)	exon (NM_134728, exon 2 of 4)	2294	NM_134728	33292	Dm.10891	NM_134728		MFS3	CG4726|Dmel\CG4726	Major Facilitator Superfamily Transporter 3	protein-coding
7553	chr3L	12002251	12003420	+	0	NA	promoter-TSS (NM_168485)	promoter-TSS (NM_168485)	80	NM_001300112	39366	Dm.6800	NM_140281		Pop2	CAF1|CG5684|Caf1|Dmel\CG5684|POP2|pop2	Pop2	protein-coding
9098	chr3L	23024301	23024570	+	0	NA	intron (NM_001259962, intron 22 of 23)	intron (NM_001259962, intron 22 of 23)	26063	NM_001043156	40515	Dm.2496	NM_079494		nrm	CG32458|CG41452|CG43079|CG8779|CT16082|Dmel\CG43079|Dmel_CG32458|Dmel_CG41452|Dmel_CG8779	neuromusculin	protein-coding
5114	chr2R	18183031	18183470	+	0	NA	TTS (NM_001274142)	TTS (NM_001274142)	840	NM_137462	37084	Dm.23256	NM_137462		CG5721	Dmel\CG5721	CG5721	protein-coding
15588	chrX	15690081	15690480	+	0	NA	intron (NR_133525, intron 1 of 2)	intron (NR_133525, intron 1 of 2)	790	NR_133525	26067097		NR_133525		CR43132	CG43132|Dmel\CR43132|lincRNA.1005|mdcds_55191	ncRNA	ncRNA
1951	chr2L	14965501	14965780	+	0	NA	intron (NM_001299017, intron 1 of 19)	intron (NM_001299017, intron 1 of 19)	6660	NM_001014485	3346206		NM_001014485		CG42313	42313|BG:DS01219.3|BG:DS03144.1|BG:SD01219.3|CG15275|CG15276|CG15277|CG33515|CT35222|Dmel\CG42313|Dmel_CG15277|Dmel_CG33515|cg15277	uncharacterized protein	protein-coding
8530	chr3L	18745531	18746170	+	0	NA	promoter-TSS (NM_140800)	promoter-TSS (NM_140800)	-6	NM_140800	40042	Dm.14493	NM_140800		MED11	BcDNA:GH01072|CG6884|Dmel\CG6884|Med11|Med21|anon-WO0153538.71|dMED21|med11	Mediator complex subunit 11	protein-coding
11401	chr3R	16715261	16716190	+	0	NA	intron (NM_169728, intron 1 of 2)	intron (NM_169728, intron 1 of 2)	18701	NM_080504	42034	Dm.21668	NM_080500		Ubx	BX-C|Bxl|CG10388|Cbx|DUbx|Dm Ubx|DmUbx|Dmel\CG10388|Hm|UBX|UBx|Uab|Ubx1b|abx|bx|bx[D]|bxd|bxd[D]|bxl|l(3)89Eb|pbx|ubx	Ultrabithorax	protein-coding
4627	chr2R	14420081	14420380	+	0	NA	promoter-TSS (NM_137120)	promoter-TSS (NM_137120)	-94	NM_001299490	36605	Dm.24512	NM_137120		CG17386	CT33484|Dmel\CG17386	uncharacterized protein	protein-coding
15768	chrX	16803891	16804160	+	0	NA	promoter-TSS (NM_206769)	promoter-TSS (NM_206769)	375	NM_132940	32670		NM_132940		CG13005	Dmel\CG13005	uncharacterized protein	protein-coding
14119	chrX	3777011	3778550	+	0	NA	TTS (NR_047749)	TTS (NR_047749)	398	NR_047749	12798103		NR_047749		mir-4962	CR43517|Dmel\CR43517|dme-mir-4962	mir-4962 stem loop	miscRNA
13712	chrX	781721	782130	+	0	NA	exon (NM_001103389, exon 2 of 2)	exon (NM_001103389, exon 2 of 2)	-2821	NM_001272173	31024	Dm.12266	NM_130502		tw	CG12311|DPOMT2|DmPOMT2|Dmel\CG12311|EG:34F3.7|POMT2|Pomt2|Tw|dPOMT2|dPomt2	twisted	protein-coding
6424	chr3L	2437281	2440130	+	0	NA	promoter-TSS (NM_001299985)	promoter-TSS (NM_001299985)	-531	NM_001299985	38306	Dm.6482	NM_139462		CG45186	CG1141|CG12790|CG13797|CG13798|CG13799|CG13800|CG16763|CG16764|CG32306|CG33231|CG33232|CG42669|Dmel\CG45186|Dmel_CG13800|Dmel_CG32306|Dmel_CG33231|Dmel_CG33232|Dmel_CG42669|c62E-11	uncharacterized protein	protein-coding
12625	chr3R	25995251	25995650	+	0	NA	TTS (NM_170252)	TTS (NM_170252)	1546	NM_001260379	12798270	Dm.38831	NM_001260379		CG43116	Dmel\CG43116	uncharacterized protein	protein-coding
14784	chrX	8650461	8651660	+	0	NA	promoter-TSS (NM_001272418)	promoter-TSS (NM_001272418)	-379	NM_001272416	31802	Dm.2933	NM_078536		oc	CG12154|Dmel\CG12154|Oc|Otd|Otx|l(1)7Ff|l(1)8Ac|ort|otd|uvi	ocelliless	protein-coding
6609	chr3L	3843831	3844380	+	0	NA	Intergenic	Intergenic	-2101	NM_168042	38451	Dm.6063	NM_079183		Awh	CG1072|Dmel\CG1072|awh|l(3)63Ea|l(3)63Ea/Awh|l(3)64Ea|l(3)SH9|l63Ea	Arrowhead	protein-coding
14641	chrX	7710721	7711230	+	0	NA	Intergenic	Intergenic	-1590	NM_001272383	31678	Dm.31076	NM_078516		CHES-1-like	CG12690|Ches-1-like|Ches1|Dmches-1|Dmel\CG12690|FoxN|anon-EST:Posey7|ches1	Checkpoint suppressor 1-like	protein-coding
5508	chr2R	21156651	21157600	+	0	NA	5' UTR (NM_001274189, exon 2 of 11)	5' UTR (NM_001274189, exon 2 of 11)	892	NM_137712	37410	Dm.21382	NM_137711		CG30389	BcDNA:AT02070|CG10518|CG4126|Dmel\CG30389	uncharacterized protein	protein-coding
9163	chr3L	23581751	23582270	+	0	NA	intron (NM_001170027, intron 3 of 6)	PROTOP_A|DNA|P	26085	NM_001170027	3355150	Dm.33791	NM_001043162		AGO3	Ago-3|Ago3|BEST:LD15785|CG40300|Dmel\CG40300|ago3|dAgo3	Argonaute 3	protein-coding
3209	chr2R	4546341	4547070	+	0	NA	promoter-TSS (NM_001042977)	promoter-TSS (NM_001042977)	14	NM_001259209	3355135	Dm.2165	NM_001042977		Stlk	BcDNA:LD05623|CG40293|Dmel\CG40293|LD05623|stlk	Ste20-like kinase	protein-coding
5775	chr2R	23169391	23169730	+	0	NA	exon (NM_137923, exon 8 of 14)	exon (NM_137923, exon 8 of 14)	-11375	NM_137919	37675		NM_137919		CG13545	Dmel\CG13545	uncharacterized protein	protein-coding
4865	chr2R	16159871	16160340	+	0	NA	intron (NM_137247, intron 1 of 8)	intron (NM_137247, intron 1 of 8)	-1311	NM_137246	36787	Dm.11766	NM_137246		CG10734	Dmel\CG10734	uncharacterized protein	protein-coding
2151	chr2L	16622171	16622530	+	0	NA	exon (NM_001273575, exon 3 of 7)	exon (NM_001273575, exon 3 of 7)	6823	NR_073791	14462786		NR_073791		CR44151	Dmel\CR44151	ncRNA	ncRNA
926	chr2L	6918061	6922800	+	0	NA	promoter-TSS (NM_001169426)	promoter-TSS (NM_001169426)	-220	NM_001273239	33967	Dm.33422	NM_164718		x16	2/30|9G8|CG10203|Dmel\CG10203|Dx16|Dxl6|RBP1-like|TN166|X16|X16/9G8|XL6|Xl6|anon-WO0118547.78|d9G8|dx16|dxl6|l(2)k00230|xl6	x16 splicing factor	protein-coding
3009	chr2R	1241291	1241890	+	0	NA	Intergenic	BLOOD_I-int|LTR|Gypsy	-22550	NM_001015176	3354930	Dm.7153	NM_001015174		CG40191	BEST:HL02313|BcDNA:LD12604|Dmel\CG40191	uncharacterized protein	protein-coding
13924	chrX	2302351	2302600	+	0	NA	intron (NM_001103397, intron 2 of 6)	intron (NM_001103397, intron 2 of 6)	7009	NM_001103397	31221	Dm.39	NM_080308		Raf	11-29|C110|CG2845|D-RAF|D-Raf|D-raf|D-raf1|DRaf|DRaf1|Dmel\CG2845|Draf|Draf-1|Draf1|EG:BACH48C10.3|Phl|RAF|Raf/phl|Raf1|dRaf|draf|l(1)2Fe|l(1)G0475|l(1)ph|l(1)phl|l(1)pole hole|l(1)polehole|l(1)polehole/draf|l(1)raf|lincRNA.937|ph|ph1|phl|raf|raf-1|raf1|rafl	Raf oncogene	protein-coding
9897	chr3R	5683921	5684980	+	0	NA	intron (NM_141317, intron 1 of 2)	intron (NM_141317, intron 1 of 2)	984	NM_141317	40701	Dm.11663	NM_141317		Rab23	CG2108|DmRab23|Dmel\CG2108|Q9VNG6|rab23	Rab23	protein-coding
9669	chr3R	4418961	4419210	+	0	NA	intron (NM_001300228, intron 1 of 9)	intron (NM_001300228, intron 1 of 9)	493	NM_001300228	40560		NM_176397		CG32944	CG10532|CG9818|Dmel\CG32944	uncharacterized protein	protein-coding
1860	chr2L	14252341	14253430	+	0	NA	Intergenic	Intergenic	-10142	NM_057442	43946	Dm.3218	NM_057442		wb	&agr1|2|2Lan|2]]|A1|BEST:CK02229|BG:DS03792.1|BG:DS03792.2|CG15288|CG32970|CG42677|CK02229|CT35236|DLAM|Dmel\CG42677|Dmel_CG15288|Dmel_CG32970|LM-A/alpha2|LanA1|alpha[[1|fus5|l(2)09437|l(2)34Fb|l(2)br1|l34Fb	wing blister	protein-coding
1258	chr2L	9347151	9347430	+	0	NA	Intergenic	Intergenic	1922	NR_124163	19835893		NR_124163		CR44802	Dmel\CR44802|lincRNA.87	ncRNA	ncRNA
15120	chrX	11578821	11579200	+	0	NA	promoter-TSS (NR_123872)	promoter-TSS (NR_123872)	-55	NR_002105	3772415		NR_002104		roX2	CR32665|Dmel\CR32665|RoX2|roX|rox2	RNA on the X 2	ncRNA
13646	chrX	451491	452120	+	0	NA	intron (NM_001144667, intron 1 of 2)	intron (NM_001144667, intron 1 of 2)	-8942	NM_057346	30985	Dm.4781	NM_057346		ase	AS-C T8|AS-C T8ase|AS-T8|ASC|Ase|CG3258|Dmel\CG3258|EG:165H7.2|T1|T1A|T1a|T8|as-T8|ascT8|bHLHc28|sc/T8	asense	protein-coding
532	chr2L	4227571	4227990	+	0	NA	promoter-TSS (NM_001273089)	promoter-TSS (NM_001273089)	81	NM_001273089	33629	Dm.19778	NM_057428		RpL40	BcDNA:RE10554|CEP52|CG2960|DUb52|Dmel\CG2960|Dub52|L40|RPL40|Rpl40|Ub52|Ubi-f|Ubi-f52|Ubiq	Ribosomal protein L40	protein-coding
1588	chr2L	11933591	11933900	+	0	NA	promoter-TSS (NM_078829)	promoter-TSS (NM_078829)	-760	NM_078829	34601	Dm.26795	NM_078829		Or33a	33B.1|33a|AN3|CG16960|DOR33B.1|DOR73|Dmel\CG16960|Or33B.1|Or73|dor73	Odorant receptor 33a	protein-coding
1459	chr2L	10762631	10763380	+	0	NA	exon (NM_135607, exon 4 of 6)	exon (NM_135607, exon 4 of 6)	1889	NM_135607	34486	Dm.3138	NM_135607		CG6495	BcDNA:GH10711|Dmel\CG6495|GH10711	CG6495	protein-coding
8747	chr3L	20497061	20497430	+	0	NA	promoter-TSS (NM_001104179)	promoter-TSS (NM_001104179)	-78	NM_001104179	40273	Dm.1016	NM_168860		CG32425	CG15869|CG5100|Dmel\CG32425	uncharacterized protein	protein-coding
10268	chr3R	8340601	8341190	+	0	NA	promoter-TSS (NM_057538)	promoter-TSS (NM_057538)	4	NM_001260057	50002	Dm.6020	NM_143927		COX7A	CG9603|COXJ|COXK|Cox7a|Dmel\CG9603|VIIa	Cytochrome c oxidase subunit 7A	protein-coding
2790	chr2L	21617871	21619210	+	0	NA	exon (NM_001038843, exon 1 of 8)	exon (NM_001038843, exon 1 of 8)	234	NM_136271	35417	Dm.7383	NM_136271		CG2201	Dmel\CG2201	CG2201	protein-coding
13528	chr4	930491	932180	+	0	NA	promoter-TSS (NM_001103382)	promoter-TSS (NM_001103382)	-620	NM_079901	43839	Dm.7136	NM_079901		eIF4G	CG10811|Dmel\CG10811|EIF4G|Eif4G|deIF4G|eIF-4G|eIF4g|p200	eukaryotic translation initiation factor 4G	protein-coding
6254	chr3L	1095551	1096700	+	0	NA	intron (NM_001274310, intron 1 of 3)	intron (NM_001274310, intron 1 of 3)	4964	NM_001274311	38116	Dm.14837	NM_167852		bab1	BAB|BAB-1|BAB1|Bab1|CG13910|CG9097|Dmel\CG9097|anon-WO0118547.639|bab|bab-I|bric-a-brac	bric a brac 1	protein-coding
5006	chr2R	17393981	17394890	+	0	NA	promoter-TSS (NM_079973)	promoter-TSS (NM_079973)	-158	NM_079973	44155	Dm.1641	NM_079973		CG10939	Dmel\CG10939|Sip1|l(2)06373	uncharacterized protein	protein-coding
1405	chr2L	10397281	10397720	+	0	NA	promoter-TSS (NM_164924)	promoter-TSS (NM_164924)	321	NM_001273413	34416	Dm.18584	NM_164919		Cnot4	CG31716|CG5244|CG5251|Cont4|Dmel\CG31716|NOT4|Not4|Q8IPB9_DROME|cg5251|not4	CCR4-NOT transcription complex subunit 4	protein-coding
8250	chr3L	16602591	16603050	+	0	NA	promoter-TSS (NM_168677)	promoter-TSS (NM_168677)	-233	NM_001275028	59215	Dm.1565	NM_168677		CG32164	CG18219|CG18860|Dmel\CG32164	uncharacterized protein	protein-coding
7845	chr3L	14135201	14136420	+	0	NA	promoter-TSS (NR_133237)	promoter-TSS (NR_133237)	-708	NR_133237	26067215		NR_133237		CR45887	Dmel\CR45887	ncRNA	ncRNA
5699	chr2R	22647401	22647910	+	0	NA	promoter-TSS (NM_137852)	promoter-TSS (NM_137852)	152	NM_001103949	5740549		NM_001103949		CG34446	CG13513|CG30219|Dmel\CG34446|Dmel_CG30219	uncharacterized protein	protein-coding
15975	chrX	18384931	18385500	+	0	NA	promoter-TSS (NM_078676)	promoter-TSS (NM_078676)	27	NM_078676	32820	Dm.2883	NM_078676		betaCOP	BcDNA.GH09317|BcDNA:GH09317|Bcop|Beta Cop|BetaCop|CG6223|COPI|Dmel\CG6223|bcop|beta-COP|beta-Cop|beta-CopII|betaCop	Coat Protein (coatomer) beta	protein-coding
4641	chr2R	14503271	14504490	+	0	NA	promoter-TSS (NM_001274041)	promoter-TSS (NM_001274041)	-78	NM_166057	36612	Dm.2970	NM_166057		Asx	ASX|CG8787|Dmel\CG8787|FBgn0261823|xen	Additional sex combs	protein-coding
7734	chr3L	13347241	13347850	+	0	NA	Intergenic	Intergenic	-1620	NM_140377	39495	Dm.15326	NM_140377		CG17687	Dmel\CG17687	uncharacterized protein	protein-coding
12492	chr3R	24908951	24909240	+	0	NA	Intergenic	Intergenic	-3091	NM_001276007	50074	Dm.16520	NM_143996		CG13643	CG13642|Dmel\CG13643	uncharacterized protein	protein-coding
3579	chr2R	7479451	7480080	+	0	NA	TTS (NM_001144142)	TTS (NM_001144142)	-2603	NM_165528	45398	Dm.7844	NM_136441		Aldh-III	ALDH|ALDH-III|CG11140|CT41571|Dhap|Dmel\CG11140|FALDH|l(2)03610	Aldehyde dehydrogenase type III	protein-coding
2363	chr2L	18874861	18876480	+	0	NA	intron (NM_001299139, intron 1 of 8)	intron (NM_001299139, intron 1 of 8)	5591	NM_057427	35147	Dm.4717	NM_057426		tup	CG10619|Dmel\CG10619|Isl|Islet|TUP|Tup|isl|islet|l(2)37Aa|l(2)E41	tailup	protein-coding
11497	chr3R	17087851	17088500	+	0	NA	promoter-TSS (NM_142340)	promoter-TSS (NM_142340)	-105	NM_142340	42065	Dm.20203	NM_142340		cal1	CAL1|CG5148|CLD2|Cal1|Dmel\CG5148	chromosome alignment defect 1	protein-coding
14000	chrX	2683851	2684100	+	0	NA	promoter-TSS (NR_123780)	promoter-TSS (NR_123780)	-130	NR_123780	19835100		NR_123780		CR44470	Dmel\CR44470|lincRNA.938	ncRNA	ncRNA
2100	chr2L	16299051	16300090	+	0	NA	promoter-TSS (NM_001273565)	promoter-TSS (NM_001273565)	288	NM_078857	34961	Dm.2593	NM_078857		heix	124/1|BG:DS02740.7|CG5876|Dmel\CG5876|ipa-6d|l(2)35Fc|l(2)k12401	heixuedian	protein-coding
2538	chr2L	19866431	19867800	+	0	NA	intron (NM_001273681, intron 1 of 13)	intron (NM_001273681, intron 1 of 13)	934	NM_001273681	35277	Dm.17935	NM_136167		sick	CG10662|CG13958|CG13959|CG13960|CG13961|CG13964|CG33316|CG34343|CG42589|CG43720|Dm_2L:104545|Dmel\CG43720|Dmel_CG10662|Dmel_CG13958|Dmel_CG13964|Dmel_CG33316|Dmel_CG34343|Dmel_CG42589	sickie	protein-coding
10437	chr3R	9392001	9393090	+	0	NA	intron (NM_001275482, intron 2 of 13)	intron (NM_001275482, intron 2 of 13)	-1345	NR_133368	26067461		NR_133368		CR46145	Dmel\CR46145	ncRNA	ncRNA
13689	chrX	643841	645100	+	0	NA	promoter-TSS (NM_130495)	promoter-TSS (NM_130495)	-291	NM_130495	31013	Dm.12267	NM_130495		CG13367	Dmel\CG13367|EG:115C2.8|anon-1BCb	uncharacterized protein	protein-coding
2040	chr2L	15740191	15740700	+	0	NA	intron (NM_001259108, intron 1 of 4)	intron (NM_001259108, intron 1 of 4)	-5812	NR_124289	19835770		NR_124289		CR44974	Dmel\CR44974	ncRNA	ncRNA
8604	chr3L	19294221	19295260	+	0	NA	promoter-TSS (NM_001144502)	promoter-TSS (NM_001144502)	-27	NM_001144502	43927	Dm.3445	NM_080528		fal	CG9670|Dmel\CG9670|Q9VVY4_DROME	falten	protein-coding
14342	chrX	5603341	5603670	+	0	NA	intron (NM_001297969, intron 1 of 2)	intron (NM_001297969, intron 1 of 2)	9250	NM_132004	31470	Dm.5357	NM_132004		Vsx1	CG4136|Chx1|DChx1|DVSX1|Dchx1|Dmel\CG4136|Vsx-1|dChx1|dVsx1|lincRNA.S8688	Visual system homeobox 1	protein-coding
3058	chr2R	2168761	2169130	+	0	NA	intron (NM_001276228, intron 1 of 7)	TABOR_I-int|LTR|Gypsy	93170	NM_001015352	3355066	Dm.29261	NM_001015352		CG17684	CG40072|CG40260|Dmel\CG17684	uncharacterized protein	protein-coding
12921	chr3R	29112761	29113640	+	0	NA	promoter-TSS (NM_170387)	promoter-TSS (NM_170387)	-8	NM_143411	43437	Dm.19569	NM_143411		CG11876	CG 11876|Dmel\CG11876|E1beta|PDHB	uncharacterized protein	protein-coding
12808	chr3R	27936991	27938770	+	0	NA	promoter-TSS (NM_001170280)	promoter-TSS (NM_001170280)	-27	NM_001276100	43351	Dm.23351	NM_170360		NSD	CG4976|Dmel\CG4976|MES-4|Mes-4|dMES-4|dMes-4	Nuclear receptor binding SET domain protein	protein-coding
1938	chr2L	14727381	14727840	+	0	NA	exon (NM_135873, exon 4 of 5)	exon (NM_135873, exon 4 of 5)	2567	NM_135873	34854		NM_135873		CG42685	BG:DS07721.6|CG12636|CG33482|DS07721.6|Dmel\CG42685|Dmel_CG12636|Dmel_CG33482	uncharacterized protein	protein-coding
4651	chr2R	14604001	14604730	+	0	NA	promoter-TSS (NM_206113)	promoter-TSS (NM_206113)	-28	NM_206112	36619	Dm.4216	NM_057415		tra2	CG10128|Dmel\CG10128|TRA 2|TRA-2|TRA2|Tra-2|Tra2|tra-2	transformer 2	protein-coding
13215	chr3R	31199361	31199730	+	0	NA	exon (NM_143592, exon 3 of 12)	exon (NM_143592, exon 3 of 12)	2629	NM_143592	43689	Dm.10912	NM_143592		CG1544	Dmel\CG1544	CG1544	protein-coding
11298	chr3R	16216081	16217310	+	0	NA	Intergenic	Intergenic	2256	NR_125180	19834912		NR_125179		CR45641	Dmel\CR45641	ncRNA	ncRNA
8877	chr3L	21479441	21481080	+	0	NA	Intergenic	Intergenic	-3781	NM_079478	40374	Dm.5749	NM_079478		croc	CG5069|Dmel\CG5069|Dmfd1|FD1|FoxC|fd1|fd78E	crocodile	protein-coding
8870	chr3L	21455371	21456060	+	0	NA	Intergenic	Intergenic	9881	NM_168905	36173	Dm.562	NM_168905		Syx7	Aval|Avl|CG5081|Dm Syx7|DmSyx7|Dmel\CG5081|FCP-C|SYX7|Syx|avl|braided|dSyn7|syx7|syx7/avl	Syntaxin 7	protein-coding
7859	chr3L	14194221	14194720	+	0	NA	intron (NM_001259820, intron 1 of 11)	intron (NM_001259820, intron 1 of 11)	3597	NM_001038920	39572	Dm.33462	NM_001038917		nuf	CG32140|CG33991|CG7867|CIP-D2|Cy3-23|D2|Dmel\CG33991|EP3077|FIP3|NUF|Nuf|Nuf1|Nuf2p|anon-D2	nuclear fallout	protein-coding
14300	chrX	5085481	5086730	+	0	NA	5' UTR (NM_001144687, exon 1 of 28)	5' UTR (NM_001144687, exon 1 of 28)	346	NM_001297950	44531		NM_167028		rg	AKAP|Akap550|CG15464|CG15465/CG6775|CG15466|CG44835|CG6775|DAKAP550|Dmel\CG44835|Dmel_CG15464|Dmel_CG6775|fas	rugose	protein-coding
15181	chrX	11905671	11905950	+	0	NA	promoter-TSS (NM_132539)	promoter-TSS (NM_132539)	-439	NM_132539	32153	Dm.3617	NM_132539		Upf1	CG1559|Dm-Upf1|DmUpf1|Dmel\CG1559|UPF1|Upf1p|smg-2|upf1	Upf1	protein-coding
8382	chr3L	17570771	17571030	+	0	NA	intron (NM_001259887, intron 5 of 7)	intron (NM_001259887, intron 5 of 7)	-4738	NR_003871	5740701	Dm.36139	NR_003871		snoRNA:Me28S-A576	CR34709|Dmel\CR34709|Me28S-Am576	ncRNA	ncRNA
234	chr2L	1510241	1510700	+	0	NA	Intergenic	Intergenic	7008	NM_134759	33333	Dm.259	NM_134759		CG18132	Dmel\CG18132	uncharacterized protein	protein-coding
458	chr2L	3610441	3611650	+	0	NA	Intergenic	Intergenic	-4289	NM_164546	33583	Dm.290	NM_164546		odd	CG3851|Dmel\CG3851|ODD|Odd|l(2)01863|ods	odd skipped	protein-coding
881	chr2L	6617501	6618010	+	0	NA	TTS (NM_164695)	TTS (NM_164695)	-1325	NR_124122	19835190		NR_124122		CR44913	Dmel\CR44913	ncRNA	ncRNA
6499	chr3L	3054911	3055820	+	0	NA	TTS (NM_206259)	TTS (NM_206259)	286	NM_139507	38365	Dm.829	NM_139507		CG16753	Dmel\CG16753	uncharacterized protein	protein-coding
3165	chr2R	3989661	3990570	+	0	NA	Intergenic	Intergenic	3784	NR_125414	19835838		NR_125318		CR45139	Dmel\CR45139	ncRNA	ncRNA
6720	chr3L	4675541	4675870	+	0	NA	exon (NM_079917, exon 2 of 21)	exon (NM_079917, exon 2 of 21)	-2127	NM_001104037	5740465	Dm.36153	NM_001104037		CG34266	Dmel\CG34266	uncharacterized protein	protein-coding
931	chr2L	6930101	6930370	+	0	NA	3' UTR (NM_164720, exon 5 of 5)	3' UTR (NM_164720, exon 5 of 5)	-1886	NM_001316382	12798583	Dm.28965	NM_001258991		CG43232	Dmel\CG43232	uncharacterized protein	protein-coding
1128	chr2L	8287241	8287930	+	0	NA	intron (NM_057397, intron 2 of 12)	intron (NM_057397, intron 2 of 12)	-7573	NR_073743	14462725		NR_073743		CR43752	Dmel\CR43752	ncRNA	ncRNA
11310	chr3R	16246871	16247290	+	0	NA	intron (NM_169709, intron 1 of 1)	intron (NM_169709, intron 1 of 1)	4264	NM_169709	53562	Dm.1728	NM_080255		tara	5472|CG6889|Dmel\CG6889|EP(3)3463|Tara|anon-WO0257455.25|l(3)03881|l(3)j1C5|l(3)jlC5	taranis	protein-coding
11214	chr3R	15552191	15552580	+	0	NA	exon (NM_142221, exon 3 of 7)	exon (NM_142221, exon 3 of 7)	448	NM_142221	41897	Dm.27304	NM_142221		AOX4	CG18516|DmAO4|Dmel\CG18516	Aldehyde oxidase 4	protein-coding
14498	chrX	6770941	6771700	+	0	NA	promoter-TSS (NM_143710)	promoter-TSS (NM_143710)	95	NM_143710	44007	Dm.3357	NM_143710		COQ7	CG14437|Dclk1|Dmel\CG14437	COQ7	protein-coding
13547	chr4	989181	989860	+	0	NA	promoter-TSS (NM_001272151)	promoter-TSS (NM_001272151)	-205	NM_079899	43833	Dm.1885	NM_079899		toy	CG11186|Dmel\CG11186|Pax-6|TOY|Toy|l(4)102CDg|l(4)8	twin of eyeless	protein-coding
9243	chr3L	25056791	25057310	+	0	NA	Intergenic	MAX_I-int|LTR|Pao	-50544	NM_001170377	3354971	Dm.5195	NM_001015221		Set1	CG17395|CG17396|CG40351|Dmel\CG40351|SET1|aaf45425 Dm|dSet1|dset1|l(3)h5	SET domain containing 1	protein-coding
3588	chr2R	7528711	7531420	+	0	NA	promoter-TSS (NM_165539)	promoter-TSS (NM_165539)	-775	NM_165539	35687	Dm.507	NM_136449		Drat	CG1600|Dmel\CG1600	Death resistor Adh domain containing target	protein-coding
13855	chrX	1907751	1909300	+	0	NA	promoter-TSS (NM_001272223)	promoter-TSS (NM_001272223)	-255	NM_130603	31154	Dm.11711	NM_130603		Edem1	CG3810|DM-pI|Dmel\CG3810|EDEM1|EG.86E4.2|EG:86E4.2|edem1	ER degradation enhancer, mannosidase alpha-like 1	protein-coding
6944	chr3L	6955381	6956070	+	0	NA	promoter-TSS (NM_139806)	promoter-TSS (NM_139806)	179	NM_139805	38756	Dm.7301	NM_139805		CG10077	BcDNA:HL01868|BcDNA:HL07910|DmRH5|Dmel\CG10077|cg10077|p90	uncharacterized protein	protein-coding
8991	chr3L	22182661	22183470	+	0	NA	intron (NM_001275275, intron 1 of 10)	intron (NM_001275275, intron 1 of 10)	-5466	NR_133301	26067298		NR_133301		CR45971	Dmel\CR45971	ncRNA	ncRNA
2190	chr2L	17073131	17073390	+	0	NA	Intergenic	Intergenic	-12390	NR_124320	14462792		NR_073796		CR43819	Dmel\CR43819|lincRNA.168	ncRNA	ncRNA
14272	chrX	4853011	4853680	+	0	NA	intron (NM_001297940, intron 1 of 7)	intron (NM_001297940, intron 1 of 7)	12512	NM_001169196	8674091		NM_001169196		CG42594	CG15470|CG32770|CG32771|CG6952|Dmel\CG42594|Dmel_CG15470|Dmel_CG32770|Dmel_CG32771	uncharacterized protein	protein-coding
15607	chrX	15795041	15796510	+	0	NA	intron (NM_132848, intron 1 of 5)	intron (NM_132848, intron 1 of 5)	253	NM_167462	32532	Dm.7984	NM_132848		CG8974	Dmel\CG8974	CG8974	protein-coding
13820	chrX	1654921	1655230	+	0	NA	3' UTR (NM_001201596, exon 8 of 9)	3' UTR (NM_001201596, exon 8 of 9)	-9977	NM_057938	31118		NM_057938		dor	CG3093|Deep-orange|Dmel\CG3093|Dof|Dor|EG:171E4.1|FI09617|Vps18|dor1|l(1)2Be|l(1)2Bw|l(1)7|l(1)76	deep orange	protein-coding
5110	chr2R	18166641	18167550	+	0	NA	promoter-TSS (NM_001169717)	promoter-TSS (NM_001169717)	45	NM_137456	37078	Dm.682	NM_137456		Nup75	CG5733|Dmel\CG5733|Nup 75|nup75	Nucleoporin 75kD	protein-coding
683	chr2L	5270381	5270920	+	0	NA	TTS (NM_135074)	TTS (NM_135074)	734	NM_175975	33753	Dm.7011	NM_175975		tkv	Atkv|Atr25D|Brk25D|Brk25D1|Brk25D2|CG14026|Dmel\CG14026|Dtfr|STK-A|TKV|TKV1|Tkv|dtfr|kv|l(2)04415|l(2)25Da|str|tkv1|tkva	thickveins	protein-coding
7110	chr3L	8524931	8525540	+	0	NA	promoter-TSS (NM_139980)	promoter-TSS (NM_139980)	-9	NM_079250	38976	Dm.2818	NM_079250		foi	CG6817|Dmel\CG6817|FOI|Foi|cg6817|dFOI|dZIPfoi|dZipFOI|kas|l(3)j8E8|l(3)neo13	fear-of-intimacy	protein-coding
9986	chr3R	6527251	6527510	+	0	NA	promoter-TSS (NM_141403)	promoter-TSS (NM_141403)	-128	NM_141403	40798	Dm.24031	NM_141403		CG15185	Dmel\CG15185	uncharacterized protein	protein-coding
3432	chr2R	6544011	6544840	+	0	NA	intron (NM_001103730, intron 1 of 6)	intron (NM_001103730, intron 1 of 6)	-10830	NR_073842	14462549		NR_073842		CR43905	Dmel\CR43905	ncRNA	ncRNA
6710	chr3L	4599591	4600410	+	0	NA	intron (NM_001014562, intron 1 of 5)	intron (NM_001014562, intron 1 of 5)	13096	NM_001202122	48973	Dm.1531	NM_080195		Src64B	C-src1|CG7524|D-Src64B|D-src|DSRC64|DSrc|DSrc64|DSrc64B|Dm SRC1|DmHD-358|Dmel\CG7524|Dsrc|Dsrc64|Dsrc64B|HD-358|MRE5|SRC 64B|SRC64B|Src|Src1|Src64|Src64b|c-src|dSrc|dsrc|src|src1|src64|src64B|src64b	Src oncogene at 64B	protein-coding
12785	chr3R	27707061	27707320	+	0	NA	promoter-TSS (NM_001038984)	promoter-TSS (NM_001038984)	90	NM_001038984	43333	Dm.14943	NM_001038984		CG12877	BcDNA:LD30051|Dmel\CG12877	uncharacterized protein	protein-coding
11334	chr3R	16388901	16389830	+	0	NA	intron (NM_001260211, intron 3 of 8)	intron (NM_001260211, intron 3 of 8)	14318	NM_057400	41988	Dm.3249	NM_057400		ss	AHR|AhR|CG6993|Dmel\CG6993|SS|Ss|ssa	spineless	protein-coding
3570	chr2R	7447211	7448190	+	0	NA	exon (NM_001273842, exon 1 of 5)	exon (NM_001273842, exon 1 of 5)	227	NM_001273842	35669	Dm.11229	NM_136436		CG11125	Dmel\CG11125	uncharacterized protein	protein-coding
7301	chr3L	10225981	10226680	+	0	NA	Intergenic	Intergenic	-1090	NM_140132	326186	Dm.4188	NM_140132		scramb1	CG32056|CG6590|CT20492|Dmel\CG32056|Scramb1	scramblase 1	protein-coding
13129	chr3R	30431021	30431380	+	0	NA	promoter-TSS (NM_143535)	promoter-TSS (NM_143535)	-864	NM_143535	43613	Dm.27454	NM_143535		CG15534	Dmel\CG15534|aSMase|alphaSmase	uncharacterized protein	protein-coding
11988	chr3R	21341801	21343110	+	0	NA	exon (NM_142710, exon 2 of 15)	exon (NM_142710, exon 2 of 15)	7146	NM_001300512	42531	Dm.33570	NM_142710		CG16791	Dmel\CG16791|R5_3R:17143989..17145881|anon-WO0172774.78	uncharacterized protein	protein-coding
14182	chrX	4260211	4261040	+	0	NA	Intergenic	Intergenic	-5472	NM_131929	31370	Dm.26455	NM_131929		CG12691	Dmel\CG12691	uncharacterized protein	protein-coding
6046	chr2R	25111851	25112230	+	0	NA	intron (NM_001299947, intron 2 of 4)	intron (NM_001299947, intron 2 of 4)	-12848	NM_079141	38007	Dm.6651	NM_079141		lov	091y|91Y|BTB-III|BtbIII|CG16778|CG2672|Dmel\CG16778|Lov|TKR|Tkr|anon-G2|dTKR|g2|tkr	jim lovell	protein-coding
6217	chr3L	754471	754860	+	0	NA	intron (NM_001274293, intron 1 of 1)	intron (NM_001274293, intron 1 of 1)	824	NM_001274293	38090	Dm.5971	NM_138213		hng3	CG13897|Dmel\CG13897|anon-WO0118547.557	hinge3	protein-coding
10248	chr3R	8269581	8270050	+	0	NA	promoter-TSS (NM_141520)	promoter-TSS (NM_141520)	81	NM_141520	40974	Dm.1101	NM_141520		CG9630	DmRH16|Dmel\CG9630|cg9630	CG9630	protein-coding
12301	chr3R	23511701	23512130	+	0	NA	Intergenic	CpG	-4439	NM_001144628	5740640		NM_001144628		CG34289	Dmel\CG34289	uncharacterized protein	protein-coding
13868	chrX	1952871	1953390	+	0	NA	intron (NM_001272227, intron 2 of 11)	intron (NM_001272227, intron 2 of 11)	11190	NM_001272230	31162	Dm.17760	NM_001038734		Hr4	CG16902|CG3600|CG42527|CG43692|CG43934|DHR4|Dmel\CG43934|Dmel_CG16902|Dmel_CG3600|Dmel_CG42527|EG:133E12.2|EG:BACH61I5.1|EP(X)1232|EP1232|GRF|NR6A2|null	Hormone receptor 4	protein-coding
8091	chr3L	15619601	15620480	+	0	NA	exon (NM_140532, exon 1 of 2)	exon (NM_140532, exon 1 of 2)	139	NM_140532	39697	Dm.4019	NM_140532		CG7372	Dmel\CG7372	CG7372	protein-coding
7614	chr3L	12520521	12521010	+	0	NA	TTS (NM_140329)	TTS (NM_140329)	-3222	NM_140330	39432	Dm.23997	NM_140330		ver	1479/10|CG14121|Dmel\CG14121|Ver|anon-WO0172774.86|anon-WO0172774.87|anon-WO0172774.89|l(3)S147910	verrocchio	protein-coding
12716	chr3R	26937821	26938100	+	0	NA	intron (NM_001276072, intron 5 of 13)	intron (NM_001276072, intron 5 of 13)	-7574	NM_143256	43238	Dm.16423	NM_143256		CG14252	Dmel\CG14252	uncharacterized protein	protein-coding
11619	chr3R	18226731	18227070	+	0	NA	promoter-TSS (NM_142438)	promoter-TSS (NM_142438)	504	NM_142439	42185	Dm.7212	NM_142439		Mdh2	CG 7998|CG7998|Dmel\CG7998|MDH-2|Mdh|l(3)psg7|mMdh|mdh2|psg7	Malate dehydrogenase 2	protein-coding
10438	chr3R	9394271	9394690	+	0	NA	promoter-TSS (NM_169274)	promoter-TSS (NM_169274)	66	NM_079564	41118	Dm.8026	NM_079564		FER	CG8874|DFER|DFer|Dfer|Dfps|Dm FPS|DmHD-179|Dmel\CG8874|FPS|Fer|FpS95D|Fps85D|HD-179|dFer|dfer|dfps|dfps 85D|dfps85D|fer|fps|fps85D	FER tyrosine kinase	protein-coding
15617	chrX	15841521	15841780	+	0	NA	TTS (NM_132853)	TTS (NM_132853)	2495	NM_132853	32539	Dm.1574	NM_132853		ArgRS	Aats-arg|CG9020|Dmel\CG9020|RRS	Arginyl-tRNA synthetase	protein-coding
4616	chr2R	14290641	14291690	+	0	NA	promoter-TSS (NM_001038857)	promoter-TSS (NM_001038857)	-125	NM_001038857	36589	Dm.3330	NM_001038856		Ih	BcDNA:GH25778|CG8585|CR30068|DMIH|DmIh|Dmel\CG8585|Dmel_CR30068|I[[h]]	I[[h]] channel	protein-coding
10132	chr3R	7150481	7151670	+	0	NA	promoter-TSS (NM_001014610)	promoter-TSS (NM_001014610)	-107	NM_001014610	40858	Dm.14817	NM_001014609		gfzf	CG10065|CG31329|CG31492|CG33546|Dmel\CG33546|GFZF|Su(Kpn)|cg10065|dGFZF|l(3)84Cc	GST-containing FLYWCH zinc-finger protein	protein-coding
13749	chrX	1063711	1064330	+	0	NA	intron (NR_123770, intron 1 of 1)	ROO_LTR|LTR|Pao	12495	NM_130525	31055	Dm.3885	NM_130525		CG14629	Dmel\CG14629|EG:103E12.2	uncharacterized protein	protein-coding
259	chr2L	1751421	1752590	+	0	NA	promoter-TSS (NM_134776)	promoter-TSS (NM_134776)	117	NM_134775	33356	Dm.7731	NM_134775		CG17712	BcDNA:GH03377|Dmel\CG17712	uncharacterized protein	protein-coding
3816	chr2R	9203251	9204790	+	0	NA	TTS (NM_136625)	TTS (NM_136625)	3104	NM_136625	35943	Dm.4922	NM_136625		CG8027	Cg8027|Dmel\CG8027	CG8027	protein-coding
8075	chr3L	15541241	15541830	+	0	NA	intron (NM_079363, intron 1 of 5)	intron (NM_079363, intron 1 of 5)	6140	NM_206374	39682	Dm.6979	NM_079363		CrebA	BBF-2|BBF2_DROME|BOX B Binding Factor-2|Bbbf2|BcDNA:SD05937|CG7450|CRE-BP|CREB|CREB-A|CREB-a|CREBA|Creb|Creb A|Creb-A|DM4|Dmel\CG7450|creb|crebA|dCREB-A|dCREBA|dCreb-A|dCrebA|l(3)03576	Cyclic-AMP response element binding protein A	protein-coding
6180	chr3L	624231	624750	+	0	NA	Intergenic	Intergenic	-2174	NM_001259607	12798544	Dm.1946	NM_167836		CG43337	BcDNA:SD03580|CG32345|Dmel\CG43337	uncharacterized protein	protein-coding
15996	chrX	18547681	18548280	+	0	NA	intron (NM_167625, intron 1 of 3)	intron (NM_167625, intron 1 of 3)	13317	NM_167625	32846	Dm.2877	NM_078678		Bx	Bd|CG10548|CG15048|CG44425|CG6500|DLMO|Dlmo|Dmel\CG44425|Dmel_CG15048|Dmel_CG6500|LMO|Lmo|Ptd|Rho|beadex/dLMO|dLMO|dLmo|dlmo|dttg|fliH|hdp|hdp-a|hld	Beadex	protein-coding
10251	chr3R	8280431	8280720	+	0	NA	Intergenic	CpG	2523	NM_169213	40975		NM_169213		ato	ATO|At|Ato|CG7508|Dmel\CG7508|ato1|ato[Dm]|bHLHa10	atonal	protein-coding
4088	chr2R	10856101	10856390	+	0	NA	exon (NM_001103792, exon 3 of 9)	exon (NM_001103792, exon 3 of 9)	-2095	NM_001273945	36147	Dm.3740	NM_136777		CG30015	CG7699|CG7701|Dmel\CG30015|anon-EST:Posey2	uncharacterized protein	protein-coding
6591	chr3L	3702611	3702860	+	0	NA	Intergenic	Intergenic	-5828	NR_124773	19835106		NR_124773		CR45675	Dmel\CR45675|lincRNA.426	ncRNA	ncRNA
16479	chrX	23315071	23315320	+	0	NA	Intergenic	BATUMI_I-int|LTR|Pao	2214	NM_001144069	7354447		NM_001144069		SteXh:CG42398	CG42398|Dmel\CG42398|RR41752	SteXh:CG42398	protein-coding
9661	chr3R	4383401	4383720	+	0	NA	exon (NM_141204, exon 3 of 8)	exon (NM_141204, exon 3 of 8)	2254	NM_141204	40553	Dm.12849	NM_141204		Cont	CG1084|CONT|CT1481|D-Axonin|DCONT|Dmel\CG1084|cont	Contactin	protein-coding
16306	chrX	20791051	20791380	+	0	NA	intron (NM_001258858, intron 6 of 10)	intron (NM_001258858, intron 6 of 10)	1638	NM_001144750	33062	Dm.2607	NM_078701		shakB	2|3|6|CG12678|CG1321|CG15451|CG32508|CG34358|Dmel\CG34358|Dmel_CG12678|Dmel_CG32508|E81|FBpp0111481|Pas|R-9-29|R9-29|Shak B|Shak-B|ShakB|W3|inx8|l(1)19Eb|l(1)LB21|l(1)R-10-14|l(1)R-10-3|l(1)R-10-7|l(1)R-9-29|l(1)TH73|l(1)W3|l(1)W3b|lincRNA.1031|nj-156|nj156|pas|pass|shB|shak-B|shkB	shaking B	protein-coding
8299	chr3L	17015741	17016860	+	0	NA	promoter-TSS (NM_168709)	promoter-TSS (NM_168709)	-120	NM_168710	39903	Dm.7811	NM_140687		CG6664	Dmel\CG6664	CG6664	protein-coding
16039	chrX	18801101	18801590	+	0	NA	intron (NM_001258813, intron 7 of 8)	intron (NM_001258813, intron 7 of 8)	-3658	NM_078682	32872	Dm.2880	NM_078682		bnb	Bnb|CG7088|Dmel\CG7088|GAP43|Gap43	bangles and beads	protein-coding
407	chr2L	3145631	3145960	+	0	NA	promoter-TSS (NM_001273062)	promoter-TSS (NM_001273062)	53	NM_001273062	33528	Dm.20602	NM_134906		ND-B14.5B	BcDNA:RE29623|CG12400|Dmel\CG12400|N4BM	NADH dehydrogenase (ubiquinone) B14.5 B subunit	protein-coding
12891	chr3R	28856541	28857500	+	0	NA	intron (NM_001276121, intron 2 of 5)	intron (NM_001276121, intron 2 of 5)	2194	NM_079991	44266	Dm.7735	NM_079991		Inx3	CG1448|Dm-inx3|Dmel\CG1448|FBpp0084719|INX-3|Ix3|anon-EST:fe2B11|inx-3|inx3	Innexin 3	protein-coding
15455	chrX	14603251	14603520	+	0	NA	promoter-TSS (NM_132738)	promoter-TSS (NM_132738)	-805	NM_001298313	32397	Dm.17429	NM_132738		CG9413	Dmel\CG9413	CG9413	protein-coding
11122	chr3R	14696001	14696470	+	0	NA	intron (NM_001032403, intron 1 of 7)	intron (NM_001032403, intron 1 of 7)	1057	NM_001032403	3772109	Dm.11236	NM_001032403		Meltrin	CG31314|CG31385|CG7649|CT23341|DMeltrin|Dmel\CG7649|FBgn0051314|Neu3|meltrin	meltrin	protein-coding
8155	chr3L	15956561	15956960	+	0	NA	TTS (NM_001144485)	TTS (NM_001144485)	133	NM_001274975	39735	Dm.972	NM_140559		elgi	CG17033|Dmel\CG17033|Nrdp1|dNrdp1	early girl	protein-coding
1712	chr2L	12899091	12899820	+	0	NA	Intergenic	(CAG)n|Simple_repeat|Simple_repeat	-13075	NM_135749	34689	Dm.3283	NM_135749		ACXC	AC|Acxc|CG5983|DACXC|Dmel\CG5983	ACXC	protein-coding
13098	chr3R	30232231	30232730	+	0	NA	Intergenic	Intergenic	5254	NM_001260434	12798044	Dm.37378	NM_001260434		CG43448	Dmel\CG43448|lincRNA.898	uncharacterized protein	protein-coding
9157	chr3L	23521751	23522040	+	0	NA	Intergenic	BATUMI_I-int|LTR|Pao	-32698	NM_001043163	3355150	Dm.33791	NM_001043162		AGO3	Ago-3|Ago3|BEST:LD15785|CG40300|Dmel\CG40300|ago3|dAgo3	Argonaute 3	protein-coding
8487	chr3L	18350571	18350870	+	0	NA	Intergenic	Intergenic	-46303	NM_079413	40014	Dm.2372	NM_079413		grim	BcDNA:RE28551|CG4345|Dmel\CG4345|GRIM|Grim|gri|grm	grim	protein-coding
6043	chr2R	25085421	25085880	+	0	NA	TTS (NM_001014554)	TTS (NM_001014554)	-1303	NM_166705	38006	Dm.19312	NM_079140		gol	CG2679|Dmel\CG2679|Gol|anon-G1|g1|meso	goliath	protein-coding
8218	chr3L	16407431	16413110	+	0	NA	intron (NM_079382, intron 1 of 4)	intron (NM_079382, intron 1 of 4)	1514	NM_001014587	39826	Dm.6723	NM_079382		fax	CG4609|Dmel\CG4609|Fax|anon-EST:Liang-1.34|anon-WO0172774.62|anon-WO0172774.63|anon-WO0172774.65|anon-WO0172774.66|anon-WO0172774.67|anon-WO0172774.68|anon-WO0172774.69|clone 1.34|fac	failed axon connections	protein-coding
566	chr2L	4385931	4386340	+	0	NA	promoter-TSS (NM_134981)	promoter-TSS (NM_134981)	-73	NM_134981	33640	Dm.4244	NM_134981		Vps53	CG3338|Dmel\CG3338	Vacuolar protein sorting 53	protein-coding
9807	chr3R	5118361	5119170	+	0	NA	Intergenic	Intergenic	-9322	NM_141255	40617	Dm.4147	NM_141255		CG12007	Dmel\CG12007|PTAR3|RabGGTalpha	uncharacterized protein	protein-coding
8672	chr3L	19889411	19889730	+	0	NA	promoter-TSS (NM_001275149)	promoter-TSS (NM_001275149)	-756	NM_001275149	40170	Dm.28317	NM_140897		Mi-2	0006/06|0854/01|CG8103|Chd4|Dm-Mi-2|Dmel\CG8103|M-i2|MI-2|MI2|Mi 2|Mi2|Pha|dMI-2|dMi|dMi-2|dMi2|hip76|l(3)01058|l(3)76BDe|l(3)A154.3M3|l(3)L1243|l(3)S000606|l(3)S085401|l(3)j3D4|pha	Mi-2	protein-coding
8507	chr3L	18461231	18461610	+	0	NA	promoter-TSS (NM_168764)	promoter-TSS (NM_168764)	-396	NM_001275085	317908	Dm.26503	NM_168764		CG32196	Dmel\CG32196	uncharacterized protein	protein-coding
9624	chr3R	4202321	4203060	+	0	NA	exon (NM_164315, exon 6 of 8)	exon (NM_164315, exon 6 of 8)	5382	NM_164315	40524	Dm.1050	NM_141179		beta-Man	CG12582|CG12583|Dmel\CG12582	beta-Mannosidase	protein-coding
6822	chr3L	5855991	5857650	+	0	NA	Intergenic	Intergenic	-11156	NM_079218	38657	Dm.2441	NM_079218		vn	CG10491|CT29452|Dm vn|Dmel\CG10491|P1749|Vein|Vn|ddd|l(3)10567|l(3)10568|l(3)L6A|l(3)ddd|l(3)rF264|l(3)vn10567|wvn	vein	protein-coding
8793	chr3L	20789191	20790070	+	0	NA	intron (NM_140999, intron 3 of 3)	intron (NM_140999, intron 3 of 3)	-1493	NM_140998	40296	Dm.1020	NM_140998		CG11396	Dmel\CG11396	uncharacterized protein	protein-coding
8822	chr3L	21046561	21047020	+	0	NA	intron (NM_168881, intron 1 of 5)	intron (NM_168881, intron 1 of 5)	-1436	NM_001170016	40327	Dm.1023	NM_168881		siz	CG10577|CG12980|CG12981|CG32434|Dmel\CG32434|Loner|loner	schizo	protein-coding
11137	chr3R	14853631	14854510	+	0	NA	promoter-TSS (NM_001014625)	promoter-TSS (NM_001014625)	-151	NM_001144584	3346167	Dm.16866	NM_001014622		btsz	BcDNA:GH06647|Btsz|CG14858|CG17304|CG18280|CG31306|CG33555|CG44012|CG7343|Dmel\CG44012|Dmel_CG17304|Dmel_CG33555|Granulophilin|l(3)10418	bitesize	protein-coding
2631	chr2L	20782971	20783370	+	0	NA	TTS (NM_001273712)	TTS (NM_001273712)	-4486	NM_136213	35342	Dm.19856	NM_136213		Pomp	38E.20|CG9324|Dmel\CG9324|POMP|UMP1|pomp	pomp	protein-coding
14329	chrX	5551011	5551600	+	0	NA	intron (NM_001297968, intron 2 of 5)	intron (NM_001297968, intron 2 of 5)	8878	NM_001038743	31469	Dm.25374	NM_001038743		Vsx2	CG15781|CG15782|CG15783|CG33980|Chx2|DChx2|Dmel\CG33980|dChx2|dVsx2	Visual system homeobox 2	protein-coding
2332	chr2L	18688531	18690060	+	0	NA	promoter-TSS (NM_165261)	promoter-TSS (NM_165261)	-233	NM_136051	35122	Dm.11262	NM_136051		CG10336	Dmel\CG10336	uncharacterized protein	protein-coding
9104	chr3L	23095191	23095870	+	0	NA	promoter-TSS (NM_168984)	promoter-TSS (NM_168984)	-59	NM_143697	43864	Dm.1411	NM_143697		RpL10	BcDNA:LD24589|CG17521|DQM|Dmel\CG17521|L10|Qm|Rp L10|anon-EST:Posey179|qm	Ribosomal protein L10	protein-coding
6444	chr3L	2588351	2588660	+	0	NA	promoter-TSS (NM_167956)	promoter-TSS (NM_167956)	-909	NM_167956	38321	Dm.2835	NM_079166		dos	141511_at|CG1044|DOS|Dmel\CG1044|Dos|E(csw)3A|E(csw[CS])3A|EC3-4|Gab-1|Su(sev)3A|Su(sev[S11])3A	daughter of sevenless	protein-coding
16083	chrX	19179401	19180460	+	0	NA	promoter-TSS (NM_133127)	promoter-TSS (NM_133127)	-100	NM_133126	32902	Dm.11579	NM_133126		CG7556	Dmel\CG7556	CG7556	protein-coding
6891	chr3L	6367071	6367380	+	0	NA	Intergenic	CpG	3366	NR_124814	19835728		NR_124814		CR45419	Dmel\CR45419	ncRNA	ncRNA
16222	chrX	20169631	20170040	+	0	NA	promoter-TSS (NM_134533)	promoter-TSS (NM_134533)	146	NM_134532	33017	Dm.28222	NM_134532		CG9581	Dmel\CG9581	CG9581	protein-coding
9091	chr3L	22958271	22958680	+	0	NA	Intergenic	Intergenic	-2455	NR_125053	19835268		NR_125053		CR45758	Dmel\CR45758	ncRNA	ncRNA
11274	chr3R	16001151	16001560	+	0	NA	exon (NM_001032019, exon 5 of 8)	exon (NM_001032019, exon 5 of 8)	6718	NR_048407	10178956		NR_037761		CR42839	Dmel\CR42839	ncRNA	ncRNA
11030	chr3R	14026141	14026500	+	0	NA	promoter-TSS (NM_142068)	promoter-TSS (NM_142068)	-358	NM_142068	41704	Dm.10784	NM_142068		rdx	0869/09|BEST:GM07940|CG10235|CG12537|CG9924|D-SPOP|Dmel\CG12537|Dmel_CG9924|Dromel_CG9924_FBtr0082871_rdx_mORF|HIB|Hib|Rdx|SPOP|Spop|anon-WO0118547.577|hib|l(3)03477|l(3)2004|l(3)88Aa|l(3)A6|l(3)S086909|l(3)SG40|l(3)dsl-6|l(3)dsl6|l(3)j1D1|l(3)j4C7|mei-P19	roadkill	protein-coding
8688	chr3L	19987631	19987910	+	0	NA	TTS (NM_168828)	TTS (NM_168828)	1177	NM_168828	317923	Dm.15128	NM_168828		Csas	CG32220|CSAS|DmCSAS|Dmel\CG32220	CMP-sialic acid synthase	protein-coding
14930	chrX	9716481	9717390	+	0	NA	Intergenic	Intergenic	11553	NR_047792	12797960		NR_047792		CR43498	Dmel\CR43498	ncRNA	ncRNA
2566	chr2L	20115761	20116130	+	0	NA	Intergenic	Intergenic	-11795	NM_136183	2768911		NM_136183		CG13970	38B.19|Dmel\CG13970	uncharacterized protein	protein-coding
5881	chr2R	23939641	23940460	+	0	NA	promoter-TSS (NM_138007)	promoter-TSS (NM_138007)	-296	NM_001299868	37803		NM_138007		CG3735	Dmel\CG3735	CG3735	protein-coding
11633	chr3R	18290971	18291340	+	0	NA	exon (NM_169802, exon 2 of 4)	exon (NM_169802, exon 2 of 4)	612	NM_169802	47260	Dm.3680	NM_143794		l(3)05822	5822|CG7129|Dmel\CG7129|L(3)05822|LD12970|clot 3142|l(3)5822	lethal (3) 05822	protein-coding
4802	chr2R	15789511	15791150	+	0	NA	intron (NM_001299538, intron 2 of 13)	intron (NM_001299538, intron 2 of 13)	-3670	NM_001299539	36743	Dm.3987	NM_137217		tun	BcDNA:LD38553|CG8253|Dmel\CG8253|Ntaq1	tungus	protein-coding
1265	chr2L	9438221	9438590	+	0	NA	intron (NM_164855, intron 1 of 3)	intron (NM_164855, intron 1 of 3)	936	NM_164855	34263	Dm.4492	NM_078799		numb	CG3779|Dmel\CG3779|N7-1|Nb|Numb|d-numb|dNumb|l(2)03235|l(2)3235|l(2)s2201|nb|numbs	numb	protein-coding
2731	chr2L	21438491	21439160	+	0	NA	promoter-TSS (NM_001032214)	promoter-TSS (NM_001032214)	-61	NM_001032154	3772166		NM_001032154		His2B:CG33892	CG33892|Dmel\CG33892|His2b:CG33892	histone H2B	protein-coding
7597	chr3L	12438411	12438920	+	0	NA	Intergenic	CpG	-5997	NM_079317	39418	Dm.941	NM_079317		toe	CG10704|Dmel\CG10704|Toe|anon-WO0172774.89	twin of eyg	protein-coding
8862	chr3L	21359771	21360220	+	0	NA	promoter-TSS (NM_168900)	promoter-TSS (NM_168900)	-184	NM_168900	318030	Dm.7466	NM_168900		CG32440	CG5051|Dmel\CG32440|bs36c07.y1	uncharacterized protein	protein-coding
10439	chr3R	9394841	9395440	+	0	NA	promoter-TSS (NM_169274)	promoter-TSS (NM_169274)	-594	NM_001275483	41118	Dm.8026	NM_079564		FER	CG8874|DFER|DFer|Dfer|Dfps|Dm FPS|DmHD-179|Dmel\CG8874|FPS|Fer|FpS95D|Fps85D|HD-179|dFer|dfer|dfps|dfps 85D|dfps85D|fer|fps|fps85D	FER tyrosine kinase	protein-coding
2697	chr2L	21245161	21245750	+	0	NA	intron (NM_057584, intron 2 of 7)	intron (NM_057584, intron 2 of 7)	7154	NR_144677	30522426		NR_144677		mir-9374	CR46295|Dmel\CR46295	mir-9374 stem loop	ncRNA
15554	chrX	15553681	15554820	+	0	NA	promoter-TSS (NM_001272646)	promoter-TSS (NM_001272646)	28	NM_001272646	32485	Dm.3052	NM_057951		Ac13E	AC 13E|AC13E|Ac35C|CG9210|DAC9|Dmel\CG9210|ac13e	Adenylyl cyclase 35C	protein-coding
14762	chrX	8554371	8554930	+	0	NA	TTS (NM_132260)	TTS (NM_132260)	4131	NM_132260	31793	Dm.4600	NM_132260		IntS4	CG12113|Dmel\CG12113|Int4|l(1)G0095	Integrator 4	protein-coding
12387	chr3R	24092721	24093020	+	0	NA	intron (NM_001202345, intron 2 of 2)	(GTGTGT)n|Simple_repeat|Simple_repeat	12893	NM_001202347	42854	Dm.2366	NM_079751		Syx1A	CG10716|CG18615|CG31136|CG31136/CG33100|CG5448|CT30033|Dm Syx1|DmSyx1A|Dmel\CG31136|SYX|SYX 1A|SYX1A|Stx1a|Syt1A|Syx|Syx-1A|Syx1|Syx1a|SyxA|anon-EST:Gibbs4|anon-WO02059370.54|dSyx1|dsyn-1A|l(3)06737|synt|syt-1A|syx|syx-1|syx-1A|syx1|syx1A	Syntaxin 1A	protein-coding
5047	chr2R	17716211	17716950	+	0	NA	promoter-TSS (NM_137405)	promoter-TSS (NM_137405)	-87	NM_137405	37012		NM_137405		CG6424	BcDNA:GH05095|Dmel\CG6424|GH05095|anon-WO0118547.96|anon-WO0153538.32|anon-WO0153538.33|anon-WO0153538.34	CG6424	protein-coding
12225	chr3R	22913061	22913450	+	0	NA	intron (NM_079730, intron 1 of 10)	intron (NM_079730, intron 1 of 10)	-10097	NM_142847	42708	Dm.34066	NM_142847		CG6660	Dmel\CG6660	CG6660	protein-coding
277	chr2L	1979241	1979840	+	0	NA	intron (NM_134789, intron 3 of 4)	intron (NM_134789, intron 3 of 4)	1215	NM_134789	33370	Dm.23834	NM_134789		CG15356	Dmel\CG15356|EMSY	uncharacterized protein	protein-coding
13903	chrX	2177791	2178400	+	0	NA	promoter-TSS (NM_080305)	promoter-TSS (NM_080305)	-912	NM_080305	31193	Dm.29	NM_080305		Cyp4ae1	4ae1|CG10755|CYP4E4|Cyp4e4|Cypae1|Dmel\CG10755|EG:152A3.6|I|P-450|P450|TcD20|anon-2Ea	Cytochrome P450-4ae1	protein-coding
13487	chr4	708251	709280	+	0	NA	intron (NM_001014693, intron 2 of 8)	intron (NM_001014693, intron 2 of 8)	1336	NM_001014694	43812	Dm.6503	NM_079889		ey	CG1464|DPax-6|Dmel\CG1464|EY|EYEL|Ey|Ey/Pax6|OK107|Pax-6|Pax6|eye|l(4)102CDh|l(4)102CDr|l(4)33|pax6	eyeless	protein-coding
1136	chr2L	8311761	8312240	+	0	NA	promoter-TSS (NM_135362)	promoter-TSS (NM_135362)	601	NM_135363	34140	Dm.352	NM_135363		CG7806	Dme_CG7806|Dmel\CG7806	CG7806	protein-coding
4220	chr2R	11678631	11678900	+	0	NA	promoter-TSS (NM_078978)	promoter-TSS (NM_078978)	589	NM_001169648	36246	Dm.30967	NM_136847		Roc2	BcDNA:RE61847|CG8998|Dmel\CG8998|Roc|dRoc2|roc2	Regulator of cullins 2	protein-coding
141	chr2L	740791	741340	+	0	NA	5' UTR (NM_001169373, exon 1 of 6)	5' UTR (NM_001169373, exon 1 of 6)	726	NM_001169373	33247	Dm.4846	NM_058079		Eaat2	CG3159|Dmel\CG3159|EAAT|dEAAT2|dEaat2	Excitatory amino acid transporter 2	protein-coding
7656	chr3L	12706581	12706840	+	0	NA	intron (NM_001274849, intron 3 of 4)	intron (NM_001274849, intron 3 of 4)	13071	NM_079323	39441		NM_079323		mirr	CG10601|DH1|De1|De3|Dmel\CG10601|Group F|IRO-C|Iro|Iro-C|IroC|MIRR|Mirr|Mrr|Sai|cre|crep|group F|iro|iro-C|l(3)69Ca|l(3)69Da|l(3)6D1|l(3)A5-3-42|mir|mrr	mirror	protein-coding
10662	chr3R	10900471	10900880	+	0	NA	Intergenic	Intergenic	-2094	NR_125137	19836249		NR_125137		CR45578	Dmel\CR45578	ncRNA	ncRNA
10576	chr3R	10448581	10450150	+	0	NA	Intergenic	CpG	-11663	NR_125129	19835244		NR_125129		CR44939	Dmel\CR44939	ncRNA	ncRNA
13116	chr3R	30375391	30375660	+	0	NA	Intergenic	Intergenic	12075	NM_001260437	46415	Dm.1630	NM_080134		Fer1HCH	1HCH|BEST:LD36673|CG2216|Dmel\CG2216|FER1|FER1HCH|Fe1HCH|Fer-L|Fer1|Fer1HC|FerHCH|HCH|T21|T9|fer1|fer1hch|l(3)00451|l(3)j10B4	Ferritin 1 heavy chain homologue	protein-coding
10705	chr3R	11390571	11391560	+	0	NA	intron (NM_001260115, intron 6 of 7)	intron (NM_001260115, intron 6 of 7)	-16853	NM_079594	41364	Dm.2445	NM_079594		mRpL40	CG5242|Dmel\CG5242|MRPL22(24)|mRpL22-24	mitochondrial ribosomal protein L40	protein-coding
15700	chrX	16340781	16341100	+	0	NA	TTS (NM_206762)	TTS (NM_206762)	4756	NM_001144731	117294	Dm.2879	NM_080715		Dsp1	CG12223|DSP1|Dmel\CG12223|Hmg14B|Hmg14D|Ssrp2|dsp1|hmg|ssrp2	Dorsal switch protein 1	protein-coding
2233	chr2L	17564661	17566260	+	0	NA	promoter-TSS (NR_047985)	promoter-TSS (NR_047985)	-647	NR_133087	26067247		NR_133086		CR45919	Dmel\CR45919|pri-mir-124	ncRNA	ncRNA
9108	chr3L	23103451	23103800	+	0	NA	TTS (NM_001043159)	TTS (NM_001043159)	2619	NM_001300223	48448	Dm.1750	NM_080179		CkIIalpha	0958/08|CG17520|CJIIalpha|CK II|CK-2|CK-II|CK-II alpha|CK2|CK2 alpha|CK2-alpha|CK2a|CK2alpha|CKII|CKII alpha|CKII-alpha|CKIIa|CKIIalfa|CKIIalpha|Cask-II-a|Ck2alpha|CkII|DmCK2alpha|DmCKIIalpha|Dmel\CG17520|Tik|alphaCK2|anon-WO02059370.53|ck2alpha|ckIIalpha|dCK2alpha|dCKII|dCKII alpha|l(3)S095808	casein kinase IIalpha	protein-coding
3586	chr2R	7519061	7519310	+	0	NA	promoter-TSS (NM_136448)	promoter-TSS (NM_136448)	-95	NM_136448	35685	Dm.506	NM_136448		CG2144	Dmel\CG2144	CG2144	protein-coding
16094	chrX	19244971	19245240	+	0	NA	TTS (NM_133141)	TTS (NM_133141)	1474	NM_133140	32916	Dm.217	NM_133140		CG7889	Dmel\CG7889	CG7889	protein-coding
13744	chrX	1041631	1041910	+	0	NA	3' UTR (NM_206601, exon 2 of 8)	3' UTR (NM_206601, exon 2 of 8)	-4454	NM_001042791	7354475	Dm.36756	NM_001042791		CG42259	C|Dmel\CG42259|anon-1Ea	uncharacterized protein	protein-coding
5672	chr2R	22411031	22412250	+	0	NA	promoter-TSS (NM_001169782)	promoter-TSS (NM_001169782)	-95	NM_057958	37559	Dm.2101	NM_057958		qkr58E-3	CG3584|Dmel\CG3584|KEP1|QKR58E-3|kep1|qkr58e-3|qrk58E-3	quaking related 58E-3	protein-coding
9042	chr3L	22571901	22572160	+	0	NA	Intergenic	Intergenic	21804	NM_079492	40475	Dm.2498	NM_079492		Trxr-2	CG11401|Dm-TrxR|DmTrx|DmTrxR-2|Dmel\CG11401|TRR|TrxR|Trxr2|trxr-2	thioredoxin reductase 2	protein-coding
10258	chr3R	8303581	8304400	+	0	NA	promoter-TSS (NM_141525)	promoter-TSS (NM_141525)	33	NM_141525	40981	Dm.31298	NM_141525		nac	CG9620|Dmel\CG9620|Gfr|Nac|gfr	neuronally altered carbohydrate	protein-coding
2574	chr2L	20199251	20200690	+	0	NA	Intergenic	HOBO|DNA|hAT-hobo	-48069	NR_124392	19835155		NR_124392		CR40341	38C.21|CG40341|Dmel\CR40341|anon-38C.21	ncRNA	ncRNA
9005	chr3L	22312331	22312760	+	0	NA	intron (NM_001275282, intron 2 of 11)	intron (NM_001275282, intron 2 of 11)	-17233	NM_168953	318034	Dm.13894	NM_168953		CG32450	BEST:GH25462|BcDNA:GH25462|Dmel\CG32450|anon-WO0140519.221	uncharacterized protein	protein-coding
15163	chrX	11806161	11806700	+	0	NA	promoter-TSS (NM_167308)	promoter-TSS (NM_167308)	-77	NM_167306	32133	Dm.2924	NM_078577		Hsc70-3	A4V4C4_DROME|BiP|Bip|CG1579|CG4147|Dmel\CG4147|GRP78|Grp78|HSC-70|HSC3|HSC70|HSC70-3|HSP7C_DROME|Hsc-3|Hsc-70-3|Hsc3|Hsc3p|Hsc70|Hsp-c3|anon-WO0138581.7|bip|dBiP|dBip|dhsc70|dmHsc72|hsc3|hsc70|hsc70-3|hsc72|l(1)G0102|l(1)G0111|l(1)G0292|l(1)G0341|l(1)G0407|l(1)G0466	Heat shock 70-kDa protein cognate 3	protein-coding
1221	chr2L	8888621	8889120	+	0	NA	promoter-TSS (NR_124152)	promoter-TSS (NR_124152)	-842	NR_124151	19835726		NR_124151		CR44415	Dmel\CR44415	ncRNA	ncRNA
2082	chr2L	16224081	16225930	+	0	NA	Intergenic	CpG	-6470	NM_165149	34951	Dm.21892	NM_165149		CG42817	BG:DS07473.1|CG12455|DS07473.1A|Dmel\CG42817|Dmel_CG12455	uncharacterized protein	protein-coding
2456	chr2L	19357771	19358300	+	0	NA	intron (NM_057993, intron 1 of 3)	intron (NM_057993, intron 1 of 3)	5192	NM_057993	35207	Dm.4769	NM_057993		dnt	CG17559|DNT|Dmel\CG17559	doughnut on 2	protein-coding
16368	chrX	21372431	21372730	+	0	NA	TTS (NR_123976)	TTS (NR_123976)	973	NR_123976	19834850		NR_123976		CR45612	Dmel\CR45612	ncRNA	ncRNA
3500	chr2R	6917311	6917570	+	0	NA	intron (NM_144058, intron 6 of 7)	intron (NM_144058, intron 6 of 7)	-5926	NM_136404	35604	Dm.11455	NM_136404		CG3358	Dmel\CG3358	CG3358	protein-coding
12096	chr3R	21822131	21823070	+	0	NA	promoter-TSS (NM_001170210)	promoter-TSS (NM_001170210)	74	NM_001275882	42567	Dm.7404	NM_079717		CASK	CAKI|CAMGUK|CASK-beta|CG13412|CG13413|CG6703|CMG|CMG/CASK|Caki|CamGUK|CamguK|Camguk|Cask|Cmg|DLin-2|Dmel\CG6703|RE09582p|caki|camguk|cask|cmg|dCASK	CASK	protein-coding
10043	chr3R	6826151	6826910	+	0	NA	intron (NM_079524, intron 2 of 2)	intron (NM_079524, intron 2 of 2)	4032	NR_037753	10178925		NR_037753		7SLRNA:CR42652	7SL RNA|7SLRNA|CR42652|Dmel\CR42652	Signal recognition particle 7SL RNA CR42652	ncRNA
1923	chr2L	14590661	14591160	+	0	NA	Intergenic	Intergenic	-2751	NM_001201881	10178899		NM_001201881		CG42680	Dmel\CG42680	uncharacterized protein	protein-coding
3076	chr2R	2499081	2499390	+	0	NA	intron (NM_001110894, intron 4 of 4)	ROO_LTR|LTR|Pao	53047	NR_047702	12798493	Dm.38842	NR_047702		mir-2279	CR42911|Dmel\CR42911|dme-mir-2279|miR-2279	mir-2279 stem loop	ncRNA
16123	chrX	19479781	19480790	+	0	NA	promoter-TSS (NM_167650)	promoter-TSS (NM_167650)	26	NM_133156	32934	Dm.14739	NM_133156		NAA15-16	CG12202|Dmel\CG12202|Nat1|dNat1|l(1)G0311	N(alpha)-acetyltransferase 15/16	protein-coding
4652	chr2R	14617621	14619310	+	0	NA	promoter-TSS (NM_176174)	promoter-TSS (NM_176174)	-306	NM_143780	46080	Dm.3305	NM_143780		Sec61beta	CG10130|DSec61beta|Dmel\CG10130|Sec1|Sec61|Secbeta61|dSec61beta|l(2)07214|sec61b|sec61beta	Sec61 beta subunit	protein-coding
16119	chrX	19393441	19393990	+	0	NA	intron (NM_167648, intron 3 of 7)	intron (NM_167648, intron 3 of 7)	40534	NM_133154	32930	Dm.31725	NM_133154		kek5	CG12199|CT10486|Dmel\CG12199|Kek5	kekkon5	protein-coding
11241	chr3R	15687001	15687340	+	0	NA	exon (NM_176504, exon 5 of 5)	exon (NM_176504, exon 5 of 5)	-5916	NM_169666	318741	Dm.5959	NM_169666		CG31446	BcDNA:RE40372|Dmel\CG31446	uncharacterized protein	protein-coding
13978	chrX	2526351	2526620	+	0	NA	intron (NM_001258562, intron 2 of 43)	intron (NM_001258562, intron 2 of 43)	-8838	NM_001258566	45320	Dm.14114	NM_001031862		trol	BcDNA:GM02481|CG12497|CG33675|CG33950|CG7981|CT23996|Dmel\CG33950|EG:BACR25B3.1|EG:BACR25B3.10|EG:BACR25B3.11|EG:BACR25B3.2|GC7891|MRE7|Pcan|TROL|Trol|Trol-A|Trol-B|Troll|ZW-1|anon-WO0153538.72|l(1)3Ac|l(1)9-96|l(1)G0023|l(1)G0271|l(1)G0374|l(1)VA51|l(1)trol|l(1)zw1|l(1)zwl|pcan|troll|zw-1|zw1	terribly reduced optic lobes	protein-coding
12143	chr3R	22210211	22210480	+	0	NA	promoter-TSS (NR_125231)	promoter-TSS (NR_125231)	-868	NR_125231	19835724		NR_125231		CR45224	Dmel\CR45224	ncRNA	ncRNA
14766	chrX	8575961	8576240	+	0	NA	intron (NM_132265, intron 2 of 9)	intron (NM_132265, intron 2 of 9)	1794	NM_001169237	31798	Dm.19450	NM_132265		CG12065	Dmel\CG12065	uncharacterized protein	protein-coding
6290	chr3L	1368031	1368430	+	0	NA	intron (NM_001274324, intron 3 of 7)	intron (NM_001274324, intron 3 of 7)	-2398	NM_080051	44856	Dm.1452	NM_080051		ru	CG1214|Dmel\CG1214|Rho-3|Rho-related [62A1]|Rho3|rho-3|rho3	roughoid	protein-coding
3675	chr2R	8092181	8092570	+	0	NA	intron (NM_136505, intron 1 of 6)	intron (NM_136505, intron 1 of 6)	679	NM_136505	35777	Dm.6080	NM_136505		CG8713	Dmel\CG8713|anon-WO0109301.39|anon-WO0109301.40|anon-WO0109301.41|anon-WO0109301.42|anon-WO0109301.43|anon-WO0109301.44|anon-WO0109301.45|anon-WO0109301.46|anon-WO0109301.5	CG8713	protein-coding
5588	chr2R	21684861	21685750	+	0	NA	promoter-TSS (NM_137760)	promoter-TSS (NM_137760)	22	NM_137760	37475	Dm.3730	NM_137760		CG10306	Dmel\CG10306|eIF3k	uncharacterized protein	protein-coding
6053	chr2R	25165391	25165920	+	0	NA	Intergenic	CpG	-2004	NM_001259590	3885596	Dm.26326	NM_001038886		CG34038	BP1023|Dm_2R:93795|Dm_2R:93799|Dmel\CG34038	uncharacterized protein	protein-coding
8025	chr3L	15236571	15237320	+	0	NA	exon (NM_080018, exon 1 of 1)	exon (NM_080018, exon 1 of 1)	1326	NM_080018	44497	Dm.3403	NM_080018		Tollo	CG6890|CT21344|Dmel\CG6890|TOLL 8|Tl-8|Toll-8|dTLR8|dToll8|toll|tollo|tollo/toll-8	tollo	protein-coding
8405	chr3L	17836951	17838220	+	0	NA	exon (NM_079407, exon 5 of 6)	exon (NM_079407, exon 5 of 6)	-2411	NM_168752	317902	Dm.31211	NM_168752		CG32189	BcDNA:RE39957|Dmel\CG32189	uncharacterized protein	protein-coding
13705	chrX	758771	759730	+	0	NA	promoter-TSS (NM_166863)	promoter-TSS (NM_166863)	-344	NM_166863	31021	Dm.11009	NM_130501		CG5273	Dmel\CG5273|EG:BACR19J1.3	CG5273	protein-coding
4740	chr2R	15329051	15329640	+	0	NA	Intergenic	CpG	-1074	NM_137187	36701	Dm.6074	NM_137187		CG8160	Dmel\CG8160	CG8160	protein-coding
14916	chrX	9650151	9651000	+	0	NA	promoter-TSS (NM_001201644)	promoter-TSS (NM_001201644)	201	NM_132348	31907	Dm.20620	NM_132348		Ptpmeg2	CG3101|CG3102|CG32697|Dmel\CG32697|L(1)G0232|MEG2|PTP-Meg2|dMeg2|l(1)G0232|lG0232	Protein tyrosine phosphatase Meg2	protein-coding
5344	chr2R	19946771	19947160	+	0	NA	promoter-TSS (NM_001169741)	promoter-TSS (NM_001169741)	-151	NM_001274170	10178943		NM_001202053		CG42691	Dmel\CG42691	uncharacterized protein	protein-coding
12943	chr3R	29262821	29264360	+	0	NA	Intergenic	Intergenic	7105	NM_001300652	19834823		NM_001300652		CG45544	Dmel\CG45544|lincRNA.886	uncharacterized protein	protein-coding
11846	chr3R	20288211	20288780	+	0	NA	exon (NM_001275826, exon 2 of 18)	exon (NM_001275826, exon 2 of 18)	-4549	NM_001260275	53560	Dm.5727	NM_080253		cic	CG43122|CG5060|CG5067|CIC|Cic|Dmel\CG43122|Dmel_CG5060|Dmel_CG5067|E(Dl)D49|cics|fet	capicua	protein-coding
2827	chr2L	21831061	21831340	+	0	NA	intron (NM_078891, intron 1 of 2)	intron (NM_078891, intron 1 of 2)	2607	NM_078891	35430	Dm.6988	NM_078891		tsh	CG1374|Dmel\CG1374|T shirt|Tsh|ae|ae[l]|l(2)04319|l(2)B4-2-12	teashirt	protein-coding
6413	chr3L	2341221	2341590	+	0	NA	intron (NM_001274395, intron 3 of 4)	intron (NM_001274395, intron 3 of 4)	18712	NM_001274395	38298	Dm.15826	NM_139456		MsR1	CG8985|DMS-R1|DMSR-1|Dm CG8985|Dmel\CG8985|DmsR|DmsR-1|MS-R|anon-WO0170980.106|anon-WO0170980.107	Myosuppressin receptor 1	protein-coding
12237	chr3R	23026771	23027200	+	0	NA	promoter-TSS (NM_170044)	promoter-TSS (NM_170044)	-272	NM_170044	42717	Dm.2373	NM_170044		lmd	CG4677|Dmel\CG4677|K|LMD|Lmd|anon-EST:CL2d4|gfl|minc	lame duck	protein-coding
13630	chrX	381571	381930	+	0	NA	intron (NM_001144667, intron 2 of 2)	intron (NM_001144667, intron 2 of 2)	-3808	NR_123758	19835367		NR_123758		CR44752	Dmel\CR44752	ncRNA	ncRNA
11705	chr3R	19096571	19097020	+	0	NA	promoter-TSS (NM_142524)	promoter-TSS (NM_142524)	-166	NM_142524	42292		NM_142524		CG6040	Dmel\CG6040	CG6040	protein-coding
12534	chr3R	25177131	25177650	+	0	NA	intron (NM_001043292, intron 2 of 8)	intron (NM_001043292, intron 2 of 8)	-6993	NM_001276020	43023	Dm.4441	NM_143089		dan	CG11849|Dan|Dmel\CG11849|fer	distal antenna	protein-coding
13020	chr3R	29738301	29739750	+	0	NA	promoter-TSS (NM_170422)	promoter-TSS (NM_170422)	750	NM_001276150	43504	Dm.1369	NM_143462		CG1969	Dmel\CG1969	CG1969	protein-coding
7016	chr3L	7654561	7654880	+	0	NA	promoter-TSS (NM_139889)	promoter-TSS (NM_139889)	32	NM_139889	38859	Dm.22214	NM_139889		CG7492	DPLG4|Dmel\CG7492|anon-EST:fe1A11	CG7492	protein-coding
7538	chr3L	11890141	11890420	+	0	NA	intron (NM_001300108, intron 2 of 3)	intron (NM_001300108, intron 2 of 3)	-1299	NM_001169956	39346	Dm.27126	NM_001169956		CG5897	Dmel\CG5897	CG5897	protein-coding
5959	chr2R	24578921	24579530	+	0	NA	exon (NM_138093, exon 1 of 2)	exon (NM_138093, exon 1 of 2)	602	NM_138093	37928	Dm.5627	NM_138093		CG4681	Dmel\CG4681|anon-WO0140519.29	CG4681	protein-coding
15924	chrX	17907091	17908050	+	0	NA	promoter-TSS (NM_133030)	promoter-TSS (NM_133030)	-122	NM_133030	32777	Dm.3175	NM_133030		Vps4	3B1|BcDNA:GH02678|CG6842|DmBcDNA.GH02678|Dmel\CG6842|Dvps4|Vps4B|bcDNA:GH02678|dvps4|vps4	Vacuolar protein sorting 4	protein-coding
5106	chr2R	18155461	18155850	+	0	NA	intron (NM_001259473, intron 2 of 3)	intron (NM_001259473, intron 2 of 3)	724	NM_001169715	44703	Dm.1712	NM_080039		lolal	25/12|Ban|CG5738|Dmel\CG5738|EP0647|EP647|LOLAL|Lolal|anon-EST:fe3D3|anon-WO0172774.186|ban|bat|l(2)k02512|l(2)kO2512	lola like	protein-coding
6567	chr3L	3474641	3474890	+	0	NA	intron (NM_001274443, intron 1 of 5)	intron (NM_001274443, intron 1 of 5)	2318	NM_001274443	38430	Dm.23967	NM_139561		CG42324	CG14972|CG14973|Dmel\CG42324|Dmel_CG14972|Dmel_CG14973	uncharacterized protein	protein-coding
2741	chr2L	21468891	21469750	+	0	NA	promoter-TSS (NM_001032157).8	promoter-TSS (NM_001032157).8	48	NM_001032136	3771938	Dm.5747	NM_001032136		His4:CG33899	CG33899|Dmel\CG33899	histone H4	protein-coding
5852	chr2R	23709641	23710110	+	0	NA	promoter-TSS (NM_079105)	promoter-TSS (NM_079105)	-83	NM_079105	37754	Dm.2569	NM_079105		l(2)not	1(2) not|CG4084|Dmel\CG4084|cDNA 10F|dAlg3|ntid	lethal (2) neighbor of tid	protein-coding
16445	chrX	22957841	22958210	+	0	NA	TTS (NM_001042847)	TTS (NM_001042847)	802	NR_123992	19835720		NR_123992		CR45502	Dmel\CR45502	ncRNA	ncRNA
4675	chr2R	14814811	14815740	+	0	NA	Intergenic	Intergenic	4712	NM_137148	36649	Dm.628	NM_137148		CG10202	Dmel\CG10202|anon-WO0140519.148	uncharacterized protein	protein-coding
10929	chr3R	13308491	13308800	+	0	NA	promoter-TSS (NM_142019)	promoter-TSS (NM_142019)	-741	NM_142019	41636	Dm.1180	NM_142019		CG32473	CG11688|CG8775|Dmel\CG32473|GM08240p	uncharacterized protein	protein-coding
4048	chr2R	10595651	10596010	+	0	NA	intron (NM_165791, intron 1 of 7)	intron (NM_165791, intron 1 of 7)	12144	NM_001014519	36118	Dm.7369	NM_078962		psq	BTB-V|BtbV|CG2368|Dmel\CG2368|PSQ|Pipsqueak|Piq|Psq|eyeful|pip|psk|psq-1|rum|zep	pipsqueak	protein-coding
8300	chr3L	17024191	17024770	+	0	NA	promoter-TSS (NM_079397)	promoter-TSS (NM_079397)	152	NM_140690	39907	Dm.3625	NM_140690		Fit2	CG7729|Dmel\CG7729	Fermitin 2	protein-coding
15864	chrX	17629111	17629920	+	0	NA	promoter-TSS (NM_132998)	promoter-TSS (NM_132998)	-23	NM_132998	32738	Dm.4461	NM_132998		CG8326	BEST:LD29336|Dmel\CG8326	CG8326	protein-coding
5582	chr2R	21657491	21658270	+	0	NA	promoter-TSS (NM_001103930)	promoter-TSS (NM_001103930)	-198	NM_001169770	37466	Dm.30883	NM_137752		ND-B12	10320|CG10320|Dmel\CG10320|NB2M|anon-EST:Posey47|anon-EST:Posey84	NADH dehydrogenase (ubiquinone) B12 subunit	protein-coding
10300	chr3R	8650471	8651450	+	0	NA	promoter-TSS (NM_001170080)	promoter-TSS (NM_001170080)	-124	NM_141551	41021	Dm.36782	NM_141551		SLIRP2	CG8021|DmSLIRP2|Dmel\CG8021|cg8021	SRA stem-loop interacting RNA binding protein 2	protein-coding
6732	chr3L	4824501	4825360	+	0	NA	promoter-TSS (NM_139675)	promoter-TSS (NM_139675)	757	NM_168103	38580	Dm.846	NM_079205		Dhc64C	CD|CG7507|Cdhc|DHC|DHC1|DHC64C|DYHC|Dhc|Dhc46C|Dhc64|Dhc64c|Dmel\CG7507|Dynein|FCP-A|Fs(3)Lab|Fs(3)Laborc|Fs(3)Sz18|HMW MAP|Lab|Su(Gl)77|cDhc|cDhc64C|dhc|dhc64C|dhc64c|l(3)64Ca	Dynein heavy chain 64C	protein-coding
13388	chr4	261411	262400	+	0	NA	exon (NM_001038713, exon 8 of 8)	exon (NM_001038713, exon 8 of 8)	6908	NM_001258487	43781		NM_143657		RhoGAP102A	BP1050|CG1748|CG34013|CG42316|Dm_4:1183|Dmel\CG42316|Dmel_CG1748|Dmel_CG34013|mlncRNA102B1|rhoGAP102A	Rho GTPase activating protein at 102A	protein-coding
15550	chrX	15486701	15487040	+	0	NA	promoter-TSS (NM_176734)	promoter-TSS (NM_176734)	-52	NM_176734	32483	Dm.4376	NM_176734		Gmap	CG32587|CG33206|CG6350|CG7821|Dmel\CG33206|GMAP|GMAP-210|GMAP210|dGMAP|l(1)G0168	Golgi microtubule-associated protein	protein-coding
15175	chrX	11886781	11887570	+	0	NA	promoter-TSS (NM_001272543)	promoter-TSS (NM_001272543)	-13	NM_132534	32148	Dm.13444	NM_132534		CG10353	Dmel\CG10353	uncharacterized protein	protein-coding
2932	chr2L	22967811	22968180	+	0	NA	Intergenic	PROTOP_A|DNA|P	-13821	NM_001273767	3355131	Dm.2855	NM_001042956		cta	CG17678|CG40010|Cta|Dmel\CG17678|GNA12/13|Galpha[[12/13]]|conc|mat(2)cta|mat(2)fog	concertina	protein-coding
7346	chr3L	10554361	10555300	+	0	NA	intron (NM_001274751, intron 2 of 13)	intron (NM_001274751, intron 2 of 13)	4252	NM_001300092	39197	Dm.36903	NM_176315		CG6527	BcDNA:AT13283|Dmel\CG6527	CG6527	protein-coding
1966	chr2L	15060391	15061190	+	0	NA	promoter-TSS (NM_001032103)	promoter-TSS (NM_001032103)	-33	NM_001273528	34883	Dm.3045	NM_057619		TfIIS	BG:DS00929.12|CG3710|DmS-II|DmSII|Dmel\CG3710|RnpSII|TFIIS|TFIISA|TFS-II|br52|l(2)35Cf|l(2)35cF|l(2)br52|l35Cf	RNA polymerase II elongation factor	protein-coding
4054	chr2R	10645211	10645850	+	0	NA	promoter-TSS (NM_136756)	promoter-TSS (NM_136756)	-103	NM_136755	36122	Dm.557	NM_136755		Git	CG16728|CT37209|Dmel\CG16728|GIT|arfgap2|dGit|dgit|git	G protein-coupled receptor kinase interacting ArfGAP	protein-coding
4428	chr2R	12996051	12997610	+	0	NA	promoter-TSS (NM_079002)	promoter-TSS (NM_079002)	-293	NM_079002	36432	Dm.2672	NM_079002		Su(z)2	Arp|CG3905|Dmel\CG3905|SU(Z)2|SUZ2|Su(Z)2|Su(z)2D|Su(z)3|Su(z)[[2]]|Suz2|l(2)k06344|su(z)2|su(z)3	Suppressor of zeste 2	protein-coding
10722	chr3R	11541221	11541870	+	0	NA	intron (NM_001014616, intron 1 of 5)	intron (NM_001014616, intron 1 of 5)	1404	NM_001014616	3346160	Dm.16989	NM_001014616		dpr4	CG12593|CG14707|CG33512|CT34497|Dmel\CG33512|Dpr-4|Dpr4	defective proboscis extension response 4	protein-coding
599	chr2L	4618311	4619280	+	0	NA	promoter-TSS (NR_124074)	promoter-TSS (NR_124074)	-792	NR_124074	19835094		NR_124074		CR44609	Dmel\CR44609|lincRNA.41	ncRNA	ncRNA
13484	chr4	696491	697850	+	0	NA	promoter-TSS (NM_166789)	promoter-TSS (NM_166789)	-519	NM_166789	43812	Dm.6503	NM_079889		ey	CG1464|DPax-6|Dmel\CG1464|EY|EYEL|Ey|Ey/Pax6|OK107|Pax-6|Pax6|eye|l(4)102CDh|l(4)102CDr|l(4)33|pax6	eyeless	protein-coding
14145	chrX	3952691	3953060	+	0	NA	exon (NM_206625, exon 8 of 8)	exon (NM_206625, exon 8 of 8)	3610	NM_206624	31349	Dm.4003	NM_130731		Vap33	BcDNA:GM03307|CG5014|DVAP|DVAP-33A|DVAP33A|Dmel\CG5014|VAP|VAP-33|VAP-33-1|VAP33-A|VAPB|Vap-33-1|Vap-33A|Vap33-1|anon-EST:Liang-2.42|anon-WO03040301.124|clone 2.42|dVAP|dVAP33A|dvap|dvap33a|l(1)G0231|vap-33A|vap33-1	VAMP-associated protein 33kDa	protein-coding
5298	chr2R	19583961	19584210	+	0	NA	intron (NM_166368, intron 2 of 8)	intron (NM_166368, intron 2 of 8)	-3287	NM_001259507	12798348	Dm.38990	NM_001259507		CG42878	Dmel\CG42878|chr2R_15474834_15475129.0	uncharacterized protein	protein-coding
5863	chr2R	23854641	23855670	+	0	NA	TTS (NM_166627)	TTS (NM_166627)	1781	NM_166627	37780	Dm.12746	NM_166627		Pym	BEST:HL05757|CG10330|CG30176|Dmel\CG30176|PYM|UD3|Wibg|pym|wibg	Partner of Y14 and Mago	protein-coding
3449	chr2R	6611951	6613280	+	0	NA	intron (NM_136371, intron 1 of 6)	intron (NM_136371, intron 1 of 6)	-1153	NM_206027	35555	Dm.5288	NM_136371		jing	1.28|AEBP2|CG9397|CG9403|CT9093|Dmel\CG9397|Dmel_CG9403|Jing|l(2)01094|l(2)22F3	jing	protein-coding
11395	chr3R	16688931	16689510	+	0	NA	intron (NM_080500, intron 1 of 1)	intron (NM_080500, intron 1 of 1)	-33558	NM_080515	42032	Dm.13706	NM_080515		modSP	CG10100|CG17557|CG31217|CT28389|Dm-SP|Dmel\CG31217|LDL|Ldlr|ModSP|SP172|SP53|Ser89E|W|X	modular serine protease	protein-coding
4187	chr2R	11552441	11553130	+	0	NA	Intergenic	Intergenic	-24575	NM_165841	36240	Dm.22056	NM_078976		en	153867_at|Apa|CG9015|Dmel\CG9015|EN|En|EnR|Eng|Engr|Engrailed|Engrailed/Invected|Es|V|en1|spa2|spt	engrailed	protein-coding
10842	chr3R	12469941	12470200	+	0	NA	Intergenic	Invader1_LTR|LTR|Gypsy	-2294	NM_169469	44921	Dm.20806	NM_169469		Hsp70Ba	CG31449|Dm-hsp70|Dmel\CG31449|HSP70|Hsp 70|Hsp-70|Hsp70|Hsp70(87C)|Hsp70B|dHsp70|dhsp70|hsp-70|hsp70|hsp70 87C|hsp70 Ba|hsp70B|hsp70Ba|hsp70b	Heat-shock-protein-70Ba	protein-coding
9582	chr3R	3374221	3374610	+	0	NA	Intergenic	Intergenic	51605	NM_001110990	5740359		NM_001110990		spok	307a2p|CG40123|CG41624|CYP307A2|Cyp307a2|Cyp307a2Psi|Cyp307a2p|Dmel\CG41624|Dmspok|spo2	spookier	protein-coding
482	chr2L	3803551	3804260	+	0	NA	intron (NM_143795, intron 1 of 3)	intron (NM_143795, intron 1 of 3)	360	NM_143795	47399	Dm.10972	NM_143795		Reph	CG3920|Dmel\CG3920|l(2)k16918|reph	Regulator of eph expression	protein-coding
6703	chr3L	4546271	4547550	+	0	NA	intron (NM_001259697, intron 2 of 3)	intron (NM_001259697, intron 2 of 3)	-3779	NM_001104035	38561	Dm.20483	NM_139659		CG11357	BcDNA:GM04393|Dmel\CG11357|GalT2|dbeta3GnT	uncharacterized protein	protein-coding
15281	chrX	12744411	12744850	+	0	NA	promoter-TSS (NM_167336)	promoter-TSS (NM_167336)	166	NM_001298236	32226	Dm.19702	NM_132596		CG4004	CG18137|Dmel\CG4004	CG4004	protein-coding
14851	chrX	9133561	9135290	+	0	NA	5' UTR (NM_001272443, exon 1 of 4)	5' UTR (NM_001272443, exon 1 of 4)	615	NM_132300	31843	Dm.5643	NM_132300		fend	BcDNA:RH56795|CG12664|Dmel\CG12664|Dromel_CG12664_FBtr0071349_ld14_mORF|LD14|ld14	forked end	protein-coding
13601	chr4	1263831	1264100	+	0	NA	intron (NM_001258510, intron 21 of 24)	intron (NM_001258510, intron 21 of 24)	32082	NM_001031859	49968	Dm.6976	NM_001031858		Cadps	BcDNA:GH07283|CAPS|CG17881|CG18026|CG33653|CG40477|Caps|Dmel\CG33653|SDCAP|cap|caps|dCAPS|dcaps|l(4)102Fb	Calcium-dependent secretion activator	protein-coding
10979	chr3R	13798421	13799830	+	0	NA	Intergenic	Intergenic	-12542	NR_125160	19835559		NR_125160		CR45590	Dmel\CR45590	ncRNA	ncRNA
7799	chr3L	13864461	13864930	+	0	NA	intron (NM_140408, intron 2 of 3)	intron (NM_140408, intron 2 of 3)	2210	NM_140408	39530	Dm.3716	NM_140408		CG8745	Dmel\CG8745	CG8745	protein-coding
8630	chr3L	19568951	19569380	+	0	NA	intron (NM_001275126, intron 5 of 5)	intron (NM_001275126, intron 5 of 5)	4034	NR_048299	12797939		NR_048299		mir-9a	CR33063|CR42891|Dmel\CR42891|Dmel_CR33063|dme-miR-9a|dme-miR-9a-5p|dme-mir-9a|miR-9|miR-9a|miR9a|mir-9|mir-9A|transfrag 22	mir-9a stem loop	ncRNA
10642	chr3R	10772691	10772940	+	0	NA	TTS (NM_169362)	TTS (NM_169362)	4559	NM_169361	41291	Dm.19238	NM_169361		fau	BcDNA:HL07933|CG45077|CG6544|Dmel\CG45077|Dmel_CG6544|Fau	fau	protein-coding
522	chr2L	4138781	4139100	+	0	NA	Intergenic	Intergenic	-10339	NM_134973	33622	Dm.292	NM_134973		CG2955	Dmel\CG2955|anon-WO0140519.175	CG2955	protein-coding
1790	chr2L	13620841	13621130	+	0	NA	intron (NM_057839, intron 5 of 12)	intron (NM_057839, intron 5 of 12)	11011	NR_047948	12798194		NR_047948		mir-2489	CR42901|Dmel\CR42901|dme-mir-2489|miR-2489	mir-2489 stem loop	ncRNA
5524	chr2R	21248651	21249440	+	0	NA	intron (NM_137721, intron 1 of 7)	intron (NM_137721, intron 1 of 7)	1914	NM_137721	37422	Dm.15759	NM_137721		ASPP	CG18375|Dmel\CG18375|dASPP	Ankyrin-repeat, SH3-domain, and Proline-rich-region containing Protein	protein-coding
16377	chrX	21434961	21435700	+	0	NA	intron (NM_001298591, intron 4 of 9)	intron (NM_001298591, intron 4 of 9)	-6074	NM_134609	33123	Dm.23695	NM_134609		CG10918	Dmel\CG10918	uncharacterized protein	protein-coding
1117	chr2L	8211861	8212380	+	0	NA	promoter-TSS (NM_001273303)	promoter-TSS (NM_001273303)	773	NM_057788	34120	Dm.2642	NM_057788		Ssb-c31a	C31A|CG8396|Dmel\CG8396|PC4-like|Ssb-C31a|p11	Single stranded-binding protein c31A	protein-coding
2491	chr2L	19565151	19565520	+	0	NA	promoter-TSS (NM_001273663)	promoter-TSS (NM_001273663)	-528	NM_136146	35252	Dm.5451	NM_136146		CG13077	Dmel\CG13077	uncharacterized protein	protein-coding
6153	chr3L	428831	429120	+	0	NA	Intergenic	Intergenic	4931	NM_138192	38066	Dm.15940	NM_138192		CG13891	Dmel\CG13891	uncharacterized protein	protein-coding
3501	chr2R	6923131	6923630	+	0	NA	promoter-TSS (NM_165497)	promoter-TSS (NM_165497)	14	NM_001259227	35604	Dm.11455	NM_136404		CG3358	Dmel\CG3358	CG3358	protein-coding
5711	chr2R	22725761	22726100	+	0	NA	intron (NM_166546, intron 9 of 15)	intron (NM_166546, intron 9 of 15)	3342	NM_001169787	43997	Dm.14398	NM_166546		jbug	AAF46896|CG11605|CG13525|CG30092|CG3550|Dmel\CG30092|Jbug	jitterbug	protein-coding
7256	chr3L	9613981	9614550	+	0	NA	promoter-TSS (NM_079282)	promoter-TSS (NM_079282)	-649	NM_079282	39118	Dm.2551	NM_079282		LanB2	CG3322|CT11145|DROLAMB2A|Dmel\CG3322|LAMB2A|LM-B2/gamma|LMG1|Lam-B2|anon-EST:fe2H3|gamma1|knod|l(3)67BDb|lamB2|lanB2	Laminin B2	protein-coding
5818	chr2R	23558681	23559280	+	0	NA	exon (NM_137964, exon 5 of 7)	exon (NM_137964, exon 5 of 7)	-1512	NM_057785	37733	Dm.1676	NM_057785		Pi3K59F	CG5373|DmVps34|Dmel\CG5373|PI(3)K|PI3K|PI3K-59F|PI3K_59F|PI[[3]]K|Pi3K_59F|VPS34|Vps34|dPI3K|dVps34|dVps34/PI3K59F|vps34	Phosphotidylinositol 3 kinase 59F	protein-coding
198	chr2L	1304151	1304410	+	0	NA	Intergenic	CpG	-24881	NM_057650	33317		NM_057650		a5	A5|CG5430|Dmel\CG5430	antennal protein 5	protein-coding
13079	chr3R	30084831	30086330	+	0	NA	intron (NM_001144657, intron 7 of 7)	HOBO|DNA|hAT-hobo	-13940	NM_001276171	43580	Dm.6953	NM_079845		sima	7951|CG31031|CG45051|CG7951|DMU43090|Dmel\CG45051|Dmel_CG31031|Dmel_CG7951|HIF alpha|HIF-1|HIF-1alpha|HIF-alpha/sima|HIF1alpha|Hif-1A|Hif1alpha|SIMA|Sima|bHLHe56|dHIF-1alpha|dHIF-alpha|l(3)j11B7	similar	protein-coding
3496	chr2R	6871901	6873370	+	0	NA	promoter-TSS (NM_001273813)	promoter-TSS (NM_001273813)	83	NM_136398	35596	Dm.11616	NM_136398		coro	CG9446|Dmel\CG9446|l(2)k08011	coro	protein-coding
6087	chr3L	60281	60870	+	0	NA	Intergenic	Intergenic	-5824	NM_001259591	12798539	Dm.38794	NM_001259591		CG43149	Dmel\CG43149	uncharacterized protein	protein-coding
5419	chr2R	20596401	20597180	+	0	NA	intron (NM_145883, intron 3 of 7)	(AT)n|Simple_repeat|Simple_repeat	2905	NM_001274173	43862	Dm.2004	NM_145883		HnRNP-K	BL|CG13425|Dmel\CG13425|Hrb57A|Q18|bl|dhnRNP K|hnRNP K|hnRNP-A1L|l(2)k08305	Heterogeneous nuclear ribonucleoprotein K	protein-coding
239	chr2L	1608341	1608860	+	0	NA	TTS (NM_001272946)	TTS (NM_001272946)	2557	NM_134764	33338	Dm.33640	NM_134764		CG31935	CG10870|CG7373|Dmel\CG31935	uncharacterized protein	protein-coding
5605	chr2R	21747031	21747320	+	0	NA	Intergenic	ROO_LTR|LTR|Pao	-10170	NM_137765	37483	Dm.4096	NM_137765		Grx-1	CG7975|Dmel\CG7975	Grx-1	protein-coding
15245	chrX	12617701	12618240	+	0	NA	intron (NM_132587, intron 1 of 2)	intron (NM_132587, intron 1 of 2)	1654	NM_132587	32213	Dm.22767	NM_132587		CG11085	Dmel\CG11085	uncharacterized protein	protein-coding
45	chr2L	207161	207750	+	0	NA	promoter-TSS (NM_001272878)	promoter-TSS (NM_001272878)	49	NM_001272878	33184	Dm.243	NM_134659		Tbc1d15-17	CG11490|Dmel\CG11490	TBC1 domain family member 15/17	protein-coding
13957	chrX	2434841	2435300	+	0	NA	Intergenic	Intergenic	-6103	NM_080310	31227	Dm.5740	NM_080310		gt	CG7952|DM17|Dmel\CG7952|EG:BACH7M4.5|GIAN_DROME|GT|Giant|Gt|l(1)3Aa|l(1)giant	giant	protein-coding
12631	chr3R	26002241	26003190	+	0	NA	TTS (NR_125261)	TTS (NR_125261)	1514	NR_125261	19836099		NR_125261		CR45037	Dmel\CR45037	ncRNA	ncRNA
6059	chr2R	25196611	25196860	+	0	NA	intron (NM_001274250, intron 3 of 8)	DNAREP1_DM|RC|Helitron	-6611	NM_001274251	38011	Dm.14982	NM_166707		CG9380	Dmel\CG9380	CG9380	protein-coding
15586	chrX	15686241	15686800	+	0	NA	exon (NM_132824, exon 4 of 4)	exon (NM_132824, exon 4 of 4)	2337	NM_132824	32503		NM_132824		CG15599	Dmel\CG15599	uncharacterized protein	protein-coding
9125	chr3L	23258491	23258930	+	0	NA	intron (NM_001259967, intron 5 of 11)	G5_DM|LINE|Jockey	9681	NM_080494	40521	Dm.33423	NM_080494		nAChRalpha4	CG12414|CG17552|Dalpha4|Dmel\CG12414|anon-WO0138359.1|nAChR|nAChR-alpha80B|nAcRalpha-4|nAcRalpha-80|nAcRalpha-80B|nAcRaplha-80B|rye	nicotinic Acetylcholine Receptor alpha4	protein-coding
3364	chr2R	6034131	6034510	+	0	NA	intron (NM_176097, intron 1 of 6)	DNAREP1_DM|RC|Helitron	2068	NM_176097	35529	Dm.13206	NM_176097		SCAP	CG14592|CG33131|CG8356|Dmel\CG33131|Scap|Scap_Dm|dSCAP|dScap|dscap	SREBP cleavage activating protein	protein-coding
8644	chr3L	19641041	19641480	+	0	NA	intron (NM_140881, intron 2 of 4)	intron (NM_140881, intron 2 of 4)	1556	NM_140881	40144	Dm.6362	NM_140881		CG8786	BcDNA:GM01527|DRNF146|Dmel\CG8786|RNF146	CG8786	protein-coding
10159	chr3R	7531491	7531800	+	0	NA	exon (NM_079540, exon 1 of 1)	exon (NM_079540, exon 1 of 1)	892	NM_079540	40904	Dm.21648	NM_079540		alphaTub84D	3t|ALPHA 84D|CG2512|D.m.ALPHA-84D|DTA4|Dmel\CG2512|T|Tub|Tub1A|aTub84D|alpha-Tub|alpha-Tub84D|alpha-tub|alpha-tub84D|alpha-tubulin|alpha3|alpha3t|alpha84D|alphaTUB|alphaTUB84D|alphaTub|alphaTub3|alphaTub84	alpha-Tubulin at 84D	protein-coding
12710	chr3R	26882641	26883290	+	0	NA	intron (NM_001276070, intron 1 of 2)	CpG	1231	NM_079798	43235	Dm.31285	NM_079798		T48	48|CG5507|Dmel\CG5507|Ubx-t48|anon-97D|t48	Transcript 48	protein-coding
2785	chr2L	21581821	21582310	+	0	NA	intron (NM_078889, intron 4 of 6)	intron (NM_078889, intron 4 of 6)	7358	NM_165385	35414		NM_078889		nompB	146590_s_at|CG12548|CG14465|CG15190|CG4137|Dmel\CG12548|IFT88|NOMPB|OSM-5|Tg737|nomp|osm-5	no mechanoreceptor potential B	protein-coding
5731	chr2R	22865381	22866210	+	0	NA	Intergenic	Intergenic	-2364	NM_079090	37631	Dm.738	NM_079090		fd59A	CG3668|Dmel\CG3668|Dmfd3|FD3|FD59A|Fd59a|fd3|fd59a|foxd	forkhead domain 59A	protein-coding
12023	chr3R	21477801	21478630	+	0	NA	Intergenic	Intergenic	-4110	NM_001275877	42543	Dm.10217	NM_142714		Fancm	CG7922|Dmel\CG7922|cg7922	Fanconi anemia group M helicase	protein-coding
4326	chr2R	12447381	12447650	+	0	NA	intron (NM_001259351, intron 1 of 5)	intron (NM_001259351, intron 1 of 5)	-5675	NM_078989	36363	Dm.4470	NM_078989		Lac	CG12369|CT24921|Dmel\CG12369|bulb|l(2)k11012|l(2)k11012b|lac	Lachesin	protein-coding
5924	chr2R	24265201	24265580	+	0	NA	TTS (NM_166665)	TTS (NM_166665)	3169	NM_001299905	37885	Dm.36514	NM_138061		CG13577	Dmel\CG13577	uncharacterized protein	protein-coding
13866	chrX	1948111	1948450	+	0	NA	intron (NM_001272227, intron 2 of 11)	intron (NM_001272227, intron 2 of 11)	6340	NM_001272230	31162	Dm.17760	NM_001038734		Hr4	CG16902|CG3600|CG42527|CG43692|CG43934|DHR4|Dmel\CG43934|Dmel_CG16902|Dmel_CG3600|Dmel_CG42527|EG:133E12.2|EG:BACH61I5.1|EP(X)1232|EP1232|GRF|NR6A2|null	Hormone receptor 4	protein-coding
4087	chr2R	10853991	10854670	+	0	NA	promoter-TSS (NM_001273945)	promoter-TSS (NM_001273945)	-180	NM_001273945	36147	Dm.3740	NM_136777		CG30015	CG7699|CG7701|Dmel\CG30015|anon-EST:Posey2	uncharacterized protein	protein-coding
7171	chr3L	9002571	9004180	+	0	NA	TTS (NM_140022)	TTS (NM_140022)	-1821	NM_140023	39036	Dm.5981	NM_140023		Doc3	CG5093|Dm-DOC3|Dmel\CG5093|Doc|doc3	Dorsocross3	protein-coding
7455	chr3L	11358391	11359210	+	0	NA	Intergenic	CpG	-5883	NR_124888	19835812		NR_124888		CR45036	Dmel\CR45036	ncRNA	ncRNA
2587	chr2L	20349391	20350740	+	0	NA	promoter-TSS (NM_001103715)	promoter-TSS (NM_001103715)	-53	NM_057666	35305	Dm.4836	NM_057666		La	38C.38|BEST:LD24519|CG10922|D-La|DLa/SS-B|Dmel\CG10922|dmLa	La autoantigen-like	protein-coding
13770	chrX	1235471	1235770	+	0	NA	promoter-TSS (NM_166873)	promoter-TSS (NM_166873)	-567	NM_166872	31071	Dm.12259	NM_130541		CG3638	BG00376|Dmel\CG3638|EG:33C11.3|TTYH2	CG3638	protein-coding
3097	chr2R	2775101	2775510	+	0	NA	intron (NM_001276230, intron 3 of 3)	FB4_DM|DNA|TcMar-Tc1	71356	NM_001170365	5740475	Dm.31659	NM_001110899		CG41378	Dmel\CG41378	uncharacterized protein	protein-coding
12162	chr3R	22420801	22421610	+	0	NA	promoter-TSS (NM_142784)	promoter-TSS (NM_142784)	44	NM_001275906	42634	Dm.3572	NM_142784		mats	CG13852|DMob1|Dmel\CG13852|Dmob1|Mats|Mob1|anon-WO0118547.303|dmob1	mob as tumor suppressor	protein-coding
15854	chrX	17506311	17507380	+	0	NA	5' UTR (NM_001272715, exon 1 of 7)	5' UTR (NM_001272715, exon 1 of 7)	244	NM_001272715	32729	Dm.1952	NM_132990		CG43658	CG12432|CG8557|Dmel\CG43658|Dmel_CG12432|Dmel_CG8557	uncharacterized protein	protein-coding
16138	chrX	19597561	19598260	+	0	NA	promoter-TSS (NM_167668)	promoter-TSS (NM_167668)	-121	NM_167668	32953	Dm.6225	NM_134480		RpS10b	CG14206|CT33819|Dmel\CG14206|GM19176|M(1)18C|M(1)36f|M(1)n|M[[n]]|Rp S10 b|S10b|i3|i73|l(1)carot13	Ribosomal protein S10b	protein-coding
4727	chr2R	15181211	15181560	+	0	NA	intron (NM_057712, intron 2 of 2)	CpG	-3773	NM_001259406	12798477	Dm.38939	NM_001259406		CG43068	Dmel\CG43068	uncharacterized protein	protein-coding
3434	chr2R	6557861	6558190	+	0	NA	intron (NM_001103730, intron 1 of 6)	intron (NM_001103730, intron 1 of 6)	-24430	NR_073842	14462549		NR_073842		CR43905	Dmel\CR43905	ncRNA	ncRNA
10182	chr3R	7907311	7907890	+	0	NA	promoter-TSS (NM_001144551)	promoter-TSS (NM_001144551)	-38	NM_001144551	40934	Dm.1094	NM_141491		Taf7	CG2670|Dmel\CG2670|E|TAF|TAF55|TAF7|TAF[[II]]|TAF[[II]]55|TFIID|Taf55|anon-84Ec|dTAF[[II]]55	TBP-associated factor 7	protein-coding
8995	chr3L	22219251	22220790	+	0	NA	intron (NM_001275275, intron 3 of 10)	intron (NM_001275275, intron 3 of 10)	5858	NR_125040	19835945		NR_125040		CR45035	Dmel\CR45035	ncRNA	ncRNA
14442	chrX	6311591	6311900	+	0	NA	intron (NM_001103421, intron 1 of 7)	intron (NM_001103421, intron 1 of 7)	2533	NM_001103421	31574		NM_132086		CG15894	Dmel\CG15894	uncharacterized protein	protein-coding
11689	chr3R	18990761	18991830	+	0	NA	intron (NM_169845, intron 1 of 5)	intron (NM_169845, intron 1 of 5)	7270	NM_001104364	53563	Dm.1249	NM_169845		gukh	CG14287|CG14288|CG31043|CG5456|CG6003|Dmel\CG31043|GUKH|GUKh|GukH|Gukh|anon-WO0118547.205	GUK-holder	protein-coding
16235	chrX	20257021	20257660	+	0	NA	promoter-TSS (NM_001169334)	promoter-TSS (NM_001169334)	-141	NM_001298559	33026	Dm.4887	NM_134536		CG17065	Dmel\CG17065	uncharacterized protein	protein-coding
13536	chr4	958021	958900	+	0	NA	promoter-TSS (NM_001272149)	promoter-TSS (NM_001272149)	-68	NM_166797	43836	Dm.14788	NM_166796		4E-T	CG11097|CG11232|CG32016|Dm4E-T|Dmel\CG32016	eIF4E-Transporter	protein-coding
12967	chr3R	29459161	29460280	+	0	NA	promoter-TSS (NR_074064)	promoter-TSS (NR_074064)	-442	NR_074064	14462526		NR_074064		CR44022	Dmel\CR44022	ncRNA	ncRNA
7777	chr3L	13615001	13615300	+	0	NA	intron (NM_001202168, intron 3 of 10)	intron (NM_001202168, intron 3 of 10)	-5672	NR_048273	12798241		NR_048273		mir-289	CR33605|CR42962|Dme-miR-289|Dmel\CR42962|Dmel_CR33605|dme-miR-289-3p|dme-miR-289-5p|miR-289|mir289	mir-289 stem loop	ncRNA
10663	chr3R	10920301	10920620	+	0	NA	Intergenic	HOBO|DNA|hAT-hobo	-21879	NR_125137	19836249		NR_125137		CR45578	Dmel\CR45578	ncRNA	ncRNA
8847	chr3L	21263321	21263660	+	0	NA	exon (NM_168892, exon 2 of 4)	exon (NM_168892, exon 2 of 4)	4475	NM_141037	40346	Dm.1030	NM_141037		CG9391	142335_at|Dmel\CG9391|IMP	CG9391	protein-coding
5411	chr2R	20557811	20558080	+	0	NA	intron (NM_001299706, intron 1 of 2)	CpG	1068	NM_001299706	37322	Dm.36477	NM_137647		lms	CG13424|Dmel\CG13424	lateral muscles scarcer	protein-coding
16279	chrX	20680001	20680990	+	0	NA	Intergenic	Intergenic	-3432	NM_134561	33058	Dm.5589	NM_134561		hydra	CG1338|Dmel\CG1338	hydra	protein-coding
4885	chr2R	16268131	16268480	+	0	NA	exon (NM_057242, exon 3 of 4)	exon (NM_057242, exon 3 of 4)	3653	NM_166158	36809	Dm.3058	NM_057836		csul	CG3730|Csul|DART5|Dart5|Dmel\CG3730|JBP1|PRMT5|dPRMT5|dart5|dprmt5	capsuleen	protein-coding
1585	chr2L	11816291	11816880	+	0	NA	exon (NM_001144348, exon 10 of 10)	exon (NM_001144348, exon 10 of 10)	-2805	NM_135675	34593	Dm.2062	NM_135675		CycY	CG14939|Dcyclin Y|Dmel\CG14939|anon-WO0118547.165|i182	Cyclin Y	protein-coding
12137	chr3R	22167901	22169610	+	0	NA	intron (NM_001275899, intron 4 of 20)	intron (NM_001275899, intron 4 of 20)	-5492	NM_001275897	42601	Dm.13728	NM_169997		SKIP	CG13863|CG13864|CG31163|CG5736|CG7086|CG7087|Dmel\CG31163	Shal K[+] channel interacting protein	protein-coding
5472	chr2R	20954791	20955130	+	0	NA	exon (NM_176240, exon 5 of 5)	exon (NM_176240, exon 5 of 5)	4858	NM_001032274	3772359	Dm.7445	NM_001032274		CG33704	Dmel\CG33704|NEST:bs05b09|NEST:bs14b07|NEST:bs27f10|NEST:bs29a11|NEST:bs30h04|bs30h04.y1	uncharacterized protein	protein-coding
6837	chr3L	5931921	5933030	+	0	NA	TTS (NM_001038902)	TTS (NM_001038902)	137	NM_168152	38669	Dm.8023	NM_079219		Rcc1	BJ1|Bj1|CG10480|CG18640 (Bj1)|Dmel\CG10480|RCC1|RanGEF|dRCC1|inxs|sdt	Regulator of chromosome condensation 1	protein-coding
7978	chr3L	14989881	14990290	+	0	NA	intron (NM_079350, intron 2 of 3)	intron (NM_079350, intron 2 of 3)	-2204	NM_001316435	39626	Dm.15285	NM_001104138		Zip71B	CG10006|Dmel\CG10006|cg10006|dZip71B	Zinc/iron regulated transporter-related protein 71B	protein-coding
9347	chr3L	27154911	27155260	+	0	NA	intron (NM_001300711, intron 7 of 8)	PROTOP_A|DNA|P	18560	NM_001300711	3354896	Dm.3062	NM_001015132		vtd	80Fh|CG17436|CG40222|DRAD21|DRad21|DmRAD21|Dmel\CG17436|Drad21|RAD21|Rad21|Rad21/Scc1|Scc1|VTD|dRad21|drad21|l(3)80Fh|l(3)Lh3|l3|lethal 3|rad21|scc1	verthandi	protein-coding
4014	chr2R	10481001	10481280	+	0	NA	TTS (NM_001273941)	TTS (NM_001273941)	977	NM_136748	36111	Dm.3848	NM_136748		CG17765	Dmel\CG17765	uncharacterized protein	protein-coding
6454	chr3L	2659791	2660070	+	0	NA	exon (NM_206257, exon 2 of 2)	exon (NM_206257, exon 2 of 2)	291	NM_206256	2769005	Dm.19397	NM_206256		CG33233	CG12036|Dmel\CG33233	uncharacterized protein	protein-coding
8453	chr3L	18184961	18186580	+	0	NA	promoter-TSS (NM_079412)	promoter-TSS (NM_079412)	-129	NM_001275081	40009	Dm.5624	NM_079412		hid	CG5123|Dmel\CG5123|HID|Hid|Hid1|W|hid1|his|l(3)05014	head involution defective	protein-coding
13926	chrX	2305691	2306990	+	0	NA	intron (NM_001103397, intron 2 of 6)	intron (NM_001103397, intron 2 of 6)	10874	NM_001103397	31221	Dm.39	NM_080308		Raf	11-29|C110|CG2845|D-RAF|D-Raf|D-raf|D-raf1|DRaf|DRaf1|Dmel\CG2845|Draf|Draf-1|Draf1|EG:BACH48C10.3|Phl|RAF|Raf/phl|Raf1|dRaf|draf|l(1)2Fe|l(1)G0475|l(1)ph|l(1)phl|l(1)pole hole|l(1)polehole|l(1)polehole/draf|l(1)raf|lincRNA.937|ph|ph1|phl|raf|raf-1|raf1|rafl	Raf oncogene	protein-coding
1035	chr2L	7618321	7618960	+	0	NA	Intergenic	Intergenic	10251	NM_001273281	34037	Dm.18244	NM_135286		CG6739	Dmel\CG6739	CG6739	protein-coding
14316	chrX	5401321	5401580	+	0	NA	TTS (NM_001103415)	TTS (NM_001103415)	9399	NM_131991	31457	Dm.13427	NM_131991		NAAT1	CG3252|DmNAT1|Dmel\CG3252|anon-WO0149848.3|dmNAT1	Nutrient Amino Acid Transporter 1	protein-coding
1116	chr2L	8210441	8211380	+	0	NA	promoter-TSS (NM_057788)	promoter-TSS (NM_057788)	212	NM_057407	34119	Dm.3713	NM_057407		Su(var)205	CBX5|CG8409|DmHP-1|DmHP1|Dmel\CG8409|E(var)29|E(var)29A|FBgn0003607|HP-1|HP1|HP1-VS|HP1A|HP1a|HP1alpha|Hp1|Hp1a|SU(VAR)205|Su(Var)2-5|Su(Var)205|Su(var)|Su(var)2-05|Su(var)2-5|Su(var)2-501|Su(var)29A|Su(var)[205]|Su-var(2)5|Su[Var]205|Su[var]205|Suvar(2)5|Suvar2-5|dHP-1a|dHP1|hp1|hp1a|su(var)205	Suppressor of variegation 205	protein-coding
9024	chr3L	22432111	22432810	+	0	NA	Intergenic	Intergenic	-7551	NR_133308	26067293		NR_133308		CR45966	Dmel\CR45966	ncRNA	ncRNA
2837	chr2L	21855181	21855450	+	0	NA	non-coding (NR_124422, exon 1 of 4)	non-coding (NR_124422, exon 1 of 4)	221	NR_124422	19835662		NR_124422		CR44917	Dmel\CR44917	ncRNA	ncRNA
15701	chrX	16349721	16350520	+	0	NA	promoter-TSS (NM_057378)	promoter-TSS (NM_057378)	-195	NM_057378	32601	Dm.4733	NM_057378		sl	CG4200|DPLCgamma|Dmel\CG4200|PLC|PLC&ygr;|PLC-gamma|PLC-gamma D|PLC-gammaD|PLCgamma|PLCgamma1|PLCgammaDmel|Plcgamma|Sl|p145|plc-gamma|plc-gammad	small wing	protein-coding
4770	chr2R	15573541	15573850	+	0	NA	promoter-TSS (NM_001299535)	promoter-TSS (NM_001299535)	67	NM_001299535	36728		NM_137206		CG8204	BcDNA:AT23078|Dmel\CG8204	CG8204	protein-coding
7715	chr3L	13119611	13121120	+	0	NA	Intergenic	Intergenic	6094	NM_079331	39491	Dm.2255	NM_079331		trn	0024/05|0641/17|CG11280|CT31487|Dmel\CG11280|anon-EST:fe2B1	tartan	protein-coding
8273	chr3L	16782801	16783140	+	0	NA	promoter-TSS (NM_168684)	promoter-TSS (NM_168684)	-40	NM_140664	39876	Dm.982	NM_140664		CG9706	Dmel\CG9706	CG9706	protein-coding
16110	chrX	19325701	19325980	+	0	NA	Intergenic	Intergenic	-3734	NM_001298506	32926	Dm.3073	NM_133150		out	BcDNA:LD28120|CG8062|Dmel\CG8062	outsiders	protein-coding
9334	chr3L	26744601	26744870	+	0	NA	Intergenic	Intergenic	339171	NM_001276238	5740664	Dm.29274	NM_001110955		CG40228	BcDNA:RE67573|Dmel\CG40228	uncharacterized protein	protein-coding
1237	chr2L	9126931	9127640	+	0	NA	exon (NM_001042884, exon 2 of 9)	exon (NM_001042884, exon 2 of 9)	1548	NM_176001	34237	Dm.6376	NM_176001		CG32982	CG18566|CG9584|CG9585|Dmel\CG32982|p78	uncharacterized protein	protein-coding
16273	chrX	20654941	20655330	+	0	NA	Intergenic	Intergenic	-1987	NM_134559	33056	Dm.12075	NM_134559		Cyp6v1	6v1|CG1829|Dmel\CG1829	Cyp6v1	protein-coding
6687	chr3L	4339521	4340120	+	0	NA	intron (NM_001259687, intron 2 of 11)	(CCATT)n|Simple_repeat|Simple_repeat	5677	NM_001259689	38534	Dm.7348	NM_139636		Cip4	CG11341|CG15015|DCIP4|Dmel\CG15015|cip4|dCIP4|dcip4	Cdc42-interacting protein 4	protein-coding
5910	chr2R	24098101	24098740	+	0	NA	promoter-TSS (NM_079114)	promoter-TSS (NM_079114)	216	NM_079113	37858	Dm.4506	NM_079113		gek	CG4012|Dmel\CG4012|Gek|MRCKalpha|MdaPk|Mrck|anon-WO0200864.1|dMRCK|l(2)09373	genghis khan	protein-coding
3878	chr2R	9584381	9585550	+	0	NA	promoter-TSS (NM_165681)	promoter-TSS (NM_165681)	322	NM_136657	35986	Dm.30898	NM_136657		Updo	CG1818|Dmel\CG1818	updo	protein-coding
4726	chr2R	15147801	15148120	+	0	NA	promoter-TSS (NM_001169685)	promoter-TSS (NM_001169685)	100	NM_001169685	36680	Dm.634	NM_137171		CG7544	Dmel\CG7544	CG7544	protein-coding
11307	chr3R	16240141	16241820	+	0	NA	intron (NM_080255, intron 1 of 1)	intron (NM_080255, intron 1 of 1)	-1836	NM_169709	53562	Dm.1728	NM_080255		tara	5472|CG6889|Dmel\CG6889|EP(3)3463|Tara|anon-WO0257455.25|l(3)03881|l(3)j1C5|l(3)jlC5	taranis	protein-coding
3208	chr2R	4544481	4545170	+	0	NA	Intergenic	OSVALDO_I-int|LTR|Gypsy	-1866	NM_001042977	3355135	Dm.2165	NM_001042977		Stlk	BcDNA:LD05623|CG40293|Dmel\CG40293|LD05623|stlk	Ste20-like kinase	protein-coding
6656	chr3L	4146081	4147340	+	0	NA	TTS (NM_168065)	TTS (NM_168065)	-1986	NM_001274477	38496	Dm.4901	NM_139605		CG1299	Dmel\CG1299|SP18|c-SP18	CG1299	protein-coding
571	chr2L	4448801	4449070	+	0	NA	promoter-TSS (NM_134991)	promoter-TSS (NM_134991)	-300	NM_134991	33650	Dm.28233	NM_134991		MFS18	BEST:CK02623|CG15438|CK02623|Dmel\CG15438	Major Facilitator Superfamily Transporter 18	protein-coding
16115	chrX	19348111	19348800	+	0	NA	promoter-TSS (NM_001169324)	promoter-TSS (NM_001169324)	-8	NM_001298507	32928		NM_167645		nAChRalpha7	CG32538|CG8082|CG8109|CT24218|Da7|Dalpha7|Dalpha7 nAChR|Dalpha7-nAChR|Dmel\CG32538|gfA|gfa|jpl|nAChR|nAChR-Dalpha7|nAChR-gfa|nAcRalpha-18C|nAcRalpha-7|nAcRalpha18C|nAchRa7|nj507|nj520|nj522|nj54|nj75	nicotinic Acetylcholine Receptor alpha7	protein-coding
6267	chr3L	1245591	1246150	+	0	NA	promoter-TSS (NM_057470)	promoter-TSS (NM_057470)	40	NM_057470	38135	Dm.804	NM_057470		Klp61F	6345|CG9191|CG9191-PA|DmKLP61F|DmKRP130|DmKlp61F|Dmel\CG9191|KIF 8|KIF11|KLP2|KLP61|KLP61F|KLP61f|KRP130|KRP[[(130)]]|KRP[[130]]|Kin-5|Klp 61F|Klp2|Klp61F/KRP130|Klp61f|Krp130|klp61F|klp61f|l(3)07012|l(3)6D283|l(3)Klp61F|urc|urcn	Kinesin-like protein at 61F	protein-coding
10635	chr3R	10706851	10707860	+	0	NA	promoter-TSS (NM_169353)	promoter-TSS (NM_169353)	381	NM_141750	41281	Dm.31242	NM_141750		CG14684	Dmel\CG14684	uncharacterized protein	protein-coding
8093	chr3L	15638201	15639100	+	0	NA	intron (NM_140534, intron 1 of 1)	intron (NM_140534, intron 1 of 1)	-4160	NM_001300143	39696	Dm.22276	NM_140534		comm3	CG13446|CG13447|CG13448|CG33209|CG42334|Dmel\CG42334|Dmel_CG13446|Dmel_CG33209	comm3	protein-coding
5471	chr2R	20953601	20954590	+	0	NA	TTS (NM_176240)	TTS (NM_176240)	3993	NM_001032274	3772359	Dm.7445	NM_001032274		CG33704	Dmel\CG33704|NEST:bs05b09|NEST:bs14b07|NEST:bs27f10|NEST:bs29a11|NEST:bs30h04|bs30h04.y1	uncharacterized protein	protein-coding
9078	chr3L	22885481	22885830	+	0	NA	intron (NM_141171, intron 1 of 2)	intron (NM_141171, intron 1 of 2)	480	NM_141171	40510	Dm.11707	NM_141171		slif	CG11128|Dmel\CG11128|Slif|slifA	slimfast	protein-coding
10135	chr3R	7174531	7174800	+	0	NA	exon (NM_169177, exon 3 of 10)	exon (NM_169177, exon 3 of 10)	-11729	NR_133350	26067237		NR_133350		CR45909	Dmel\CR45909	ncRNA	ncRNA
16480	chrX	23316191	23316480	+	0	NA	TTS (NM_001144069)	TTS (NM_001144069)	1074	NM_001144069	7354447		NM_001144069		SteXh:CG42398	CG42398|Dmel\CG42398|RR41752	SteXh:CG42398	protein-coding
12374	chr3R	24031421	24032240	+	0	NA	promoter-TSS (NM_001170238)	promoter-TSS (NM_001170238)	-3	NM_170108	42843	Dm.6042	NM_079749		KrT95D	CG5405|Dmel\CG5405	Krueppel target at 95D	protein-coding
12986	chr3R	29555761	29556870	+	0	NA	promoter-TSS (NM_057976)	promoter-TSS (NM_057976)	-71	NM_057976	45285	Dm.1455	NM_057976		Dr	153515_at|99B|CG1897|Dmel\CG1897|Dr/msh|Msh|Msx|l(3)FA30|ltt|msh|msh-1|msh1	Drop	protein-coding
7010	chr3L	7518991	7519810	+	0	NA	promoter-TSS (NM_168218)	promoter-TSS (NM_168218)	-83	NM_168218	38845	Dm.18618	NM_168218		ltl	CG14836|CG32372|CG7545|CT15760|Dmel\CG32372|F|anon-EST:CL1a11|l(3)tr|lincRNA.S4366	larval translucida	protein-coding
4083	chr2R	10838531	10839130	+	0	NA	promoter-TSS (NM_136776)	promoter-TSS (NM_136776)	-103	NM_136776	36146	Dm.7058	NM_136776		LTV1	BcDNA:LD21529|CG7686|Dmel\CG7686	LTV1 ribosome biogenesis factor	protein-coding
15828	chrX	17324841	17325180	+	0	NA	TTS (NM_001272712)	TTS (NM_001272712)	10429	NM_078662	32723	Dm.2611	NM_078662		B-H2	B|BH2|Bar|Bar-H2|BarH|Barh2|CG5488|Dmel\CG5488|bar-h2	BarH2	protein-coding
97	chr2L	514651	514940	+	0	NA	intron (NM_001272902, intron 2 of 8)	intron (NM_001272902, intron 2 of 8)	-8671	NM_057432	33225	Dm.4716	NM_057432		ush	CG2762|Dmel\CG2762|FOG|USH|Ush|ZFPM2|dFOG|l(2)19|u-sh|ushaped	u-shaped	protein-coding
2244	chr2L	17727871	17729320	+	0	NA	intron (NM_165224, intron 2 of 21)	HOBO|DNA|hAT-hobo	23751	NM_001032106	35070	Dm.5768	NM_165224		CadN	B|CG7100|CT21941|Cad-N|D-cad|DN|DN-CAD|DN-CAd|DN-Cad|DN-cad|DNCad|DNcad|Dmel\CG7100|N-Cad|N-Cadh|N-cad|N-cadherin|NCAD|NCad|Ncad|S(DmcycE[JP])2.12|anon-EST:CL32|cad1|cadN|l(2)36Da|l(2)Bld|n-cad|ncad	Cadherin-N	protein-coding
8455	chr3L	18199451	18199920	+	0	NA	Intergenic	Intergenic	-1809	NM_140777	40010	Dm.24018	NM_140777		CG7320	Dmel\CG7320	CG7320	protein-coding
2012	chr2L	15475761	15476080	+	0	NA	TTS (NM_057384)	TTS (NM_057384)	2340	NM_057384	34908	Dm.3035	NM_057384		sna	BG:DS01845.1|CG3956|Dmel\CG3956|SNA|SNAIL|Sco|Sna|br28|br29|l(2)35Db|l(2)br28|l(2)br29|l(3)br28|l35Db|sn	snail	protein-coding
6750	chr3L	5042631	5042990	+	0	NA	intron (NM_001259706, intron 3 of 7)	ROO_I-int|LTR|Pao	8628	NR_073917	14462834		NR_073917		CR43884	Dmel\CR43884	ncRNA	ncRNA
10289	chr3R	8561901	8562240	+	0	NA	promoter-TSS (NM_169227)	promoter-TSS (NM_169227)	-306	NM_001300306	41013	Dm.2464	NM_079558		pch2	CG11743|CG11744|CG31453|Dmel\CG31453	pachytene checkpoint 2	protein-coding
10459	chr3R	9509721	9510650	+	0	NA	TTS (NM_057351)	TTS (NM_057351)	139	NM_141642	41138	Dm.7304	NM_141642		rump	CG9373|Dmel\CG9373|HnRNP-S5|Hrp59|S5|cg9373|hnRNP M|hrp59|p70|p75	rumpelstiltskin	protein-coding
2694	chr2L	21220501	21221830	+	0	NA	promoter-TSS (NM_001273738)	promoter-TSS (NM_001273738)	-147	NM_001299194	35397		NM_136257		CG8677	BEST:LD14959|BEST:LD19244|Dmel\CG8677|LD14959|dRsf-1|rsf-1	CG8677	protein-coding
3316	chr2R	5671541	5672190	+	0	NA	exon (NM_136335, exon 1 of 1)	exon (NM_136335, exon 1 of 1)	124	NM_136335	35504	Dm.5791	NM_136335		kune	CG1298|Dmel\CG1298|Kune	kune-kune	protein-coding
12658	chr3R	26180731	26181140	+	0	NA	intron (NM_001260381, intron 1 of 4)	intron (NM_001260381, intron 1 of 4)	-4316	NM_001260383	43179	Dm.34061	NM_170260		CG31086	CG14558|Dmel\CG31086	uncharacterized protein	protein-coding
3271	chr2R	5237841	5238420	+	0	NA	intron (NM_001316406, intron 4 of 19)	intron (NM_001316406, intron 4 of 19)	12892	NM_001103722	35483	Dm.12140	NM_001103722		Nipped-A	41Ah|CG10549|CG2905|CG33554|Dmel\CG33554|GroupV|Nip-A|NipA|Nipped A|Nipped[A]|TRA1|TRRAP|Tra-1|Tra1|dTRRAP|dTra1|dmTRRAP|l(2)41Ah|l(2)C123|l(2)EMS34-12|tra1	Nipped-A	protein-coding
8908	chr3L	21634901	21636020	+	0	NA	exon (NM_168929, exon 1 of 3)	exon (NM_168929, exon 1 of 3)	155	NM_168929	40404	Dm.15066	NM_168929		ORMDL	CG14577|Dmel\CG14577	ORMDL	protein-coding
5966	chr2R	24607011	24607430	+	0	NA	promoter-TSS (NM_138102)	promoter-TSS (NM_138102)	-47	NM_138102	37937		NM_138102		CG42360	CG13588|CG3579|Dmel\CG42360|Dmel_CG13588|Dmel_CG3579	uncharacterized protein	protein-coding
[truncated: 14,708 more rows]

## Sheet: opa_nc15
PeakID (cmd=annotatePeaks.pl opa_nc15_peaks_q1E-5_101019.bed dm6)	Chr	Start	End	Strand	Peak Score	Focus Ratio/Region Size	Annotation	Detailed Annotation	Distance to TSS	Nearest PromoterID	Entrez ID	Nearest Unigene	Nearest Refseq	Nearest Ensembl	Gene Name	Gene Alias	Gene Description	Gene Type
[truncated: 16,490 more rows]

[truncated: 5 more sheets: ATAC_sh_opa_nc14D_S5_S10_S11, UAS_opa_nc14B_S2_S3, UAS_opa_nc14B_S14, Opa1_mutant_nc14D_S4, Control_nc14D_S8_9_13]
